# Supplementary material
Source: publisher figshare collection journal article supplement (https://future-science-group.figshare.com/articles/dataset/_/20166407)
Supplement: Supplementary file 1 [file 1]

## Sheet: Index
Supplementary Tables
Supplementary Table 7: All differentially methylated probes (DMP) associated with alcohol consumption identified from nine studies included in the review
Supplementary Table 8: All differentially methylated regions (DMR) associated with alcohol consumption identified from four studies included in the review (only data available online)
Supplementary Table 9: KEGG (Kyoto Encyclopedia of Genes and Genomes) pathways and GO (Gene Ontology) pathways associated with identified DMP in Dugue et al.
Reference studies' information
Identification	Reference
Cronje 2020	Cronjé HT et al. Replication and expansion of epigenome-wide association literature in a black South African population. Clinical epigenetics. 2020;12(1):6.
Langdon 2020	Langdon R et al. Identifying epigenetic biomarkers of established prognostic factors and survival in a clinical cohort of individuals with oropharyngeal cancer. Clinical epigenetics. 2020;12(1):95.
Liang 2020	Liang X et al. DNA methylation signature on phosphatidylethanol, not on self-reported alcohol consumption, predicts hazardous alcohol consumption in two distinct populations. Molecular psychiatry. 2020.
Stephenson 2020	Stephenson M et al. Associations of Alcohol Consumption With Epigenome-Wide DNA Methylation and Epigenetic Age Acceleration: Individual-Level and Co-twin Comparison Analyses. Alcoholism, clinical and experimental research. 2021;45(2):318-28.
Dugue 2019	Dugué PA et al. Alcohol consumption is associated with widespread changes in blood DNA methylation: Analysis of cross-sectional and longitudinal data. Addiction biology. 2021;26(1):e12855.
Perrier 2019	Perrier F et al. Association of leukocyte DNA methylation changes with dietary folate and alcohol intake in the EPIC study. Clinical epigenetics. 2019;11(1):57.
Wilson 2019	Wilson LE et al. Alcohol and DNA Methylation: An Epigenome-Wide Association Study in Blood and Normal Breast Tissue. American journal of epidemiology. 2019;188(6):1055-65.
Liu 2018	Liu C et al. A DNA methylation biomarker of alcohol consumption. Molecular psychiatry. 2018;23(2):422-33.
McCartney 2018	McCartney DL et al. Epigenetic prediction of complex traits and death. Genome Biology. 2018;19(1):136.
Clark 2015	Clark SL et al. Combined Whole Methylome and Genomewide Association Study Implicates CNTN4 in Alcohol Use. Alcoholism, clinical and experimental research. 2015;39(8):1396-405.
Column legends
Study	Identification of the reference study
n	sample size
Ethnicity	Ethnicity of participants in the study sample. If the percentage is not specified, 100% of the subjects are of the indicated ethnicity, otherwise it is noted "Ethnicity:percentage".
Variable type	Type of variable used in the statistical analysis for alcohol consumption
Variable	Unit for alcohol consumption when variable type is continuous, or groups compared when alcohol consumption is categorized
Chr	Chromosome
Block Start	Block start co-ordinates are given for hg19
Block End	Block end co-ordinates are given for hg19
Probe	Probe names included in the DMR or number of CpGs included in the DMR
Value	T-value for Clark et al. (2015), or Mean beta fold change within the region for Dugue et al. (2019), or Beta minimum and beta maximum for Perrier et al. (2019)
p-value	Raw p-value
q-value	p-value that adjusted for the False Discovery Rate
Genes	Genes in the DMR
Gene	Nearest gene from the DMP
CpG	Probe name
pos	Position on the chromosome
Beta	Regression coefficient: beta
Adjusted p-value	p-value ajusted for multiple testing
CpG island region	Region of the CpG island where the DMP is located (N Shlef, N Shore, CpG Island, S Shore, S Shelf)
Gene region	Region of the gene where the DMP is located (TSS1500, TSS200, 5'UTR, 1st Exon, Body, 3'UTR)
Collection	the collection of pathways to test ("GO" or "KEGG")
Pathway entry	Entry of the pathway
Pathway name	Name of the pathway
Ont	Ontology that the GO term belongs to if testing GO pathways. "BP" - biological process, "CC" - cellular component, "MF" - molecular function
N	Number of genes in the GO or KEGG term
DE	Number of genes that are differentially methylated
P.DE	P-value for over-representation of the GO or KEGG term term
FDR	False discovery rate
Abreviations
AA	African Ancestry
B	Black
BP	Biological process
Cat	Categorical
CC	Cellular component
Cont	Continuous
DMP	Differentially Methylated Position
DMR	Differentially Methylated Region
EA	European Ancestry
g	Gram
GO	Gene Ontology
Hisp	Hispanic
KEGG	Kyoto Encyclopedia of Genes and Genomes
MF	Molecular function
MZ	Monozygotic
no	Number
NR	Not reported
PEth	Phosphatidylethanol
W	White

## Sheet: S7
Supplementary Table 7: All differentially methylated probes (DMP) associated with alcohol consumption identified from nine studies included in the review
Study	n	Ethnicity	Variable type	Variable	CpG	Gene	chr	pos	Beta	P-Value	Adjusted p-value	CpG island region	Gene region
Liu 2018	2423	AA	Cat	at-risk drinkers vs non-drinkers	cg00400041	ZFP62	5	180284090	0.00183485	1.87e-08	NR	N_Shelf	NR
Liu 2018	2423	AA	Cat	at-risk drinkers vs non-drinkers	cg01617018	GDPD3	16	30116135	0.0027003	3.93e-09	NR		NR
Liu 2018	2423	AA	Cat	at-risk drinkers vs non-drinkers	cg02027979	NXF1	11	62562474	0.00242098	7.19e-08	NR	S_Shelf	NR
Liu 2018	2423	AA	Cat	at-risk drinkers vs non-drinkers	cg02360560		4	101229924	0.00336275	9.7e-09	NR		NR
Liu 2018	2423	AA	Cat	at-risk drinkers vs non-drinkers	cg07623058		5	2128976	0.00230606	5.48e-08	NR		NR
Liu 2018	2423	AA	Cat	at-risk drinkers vs non-drinkers	cg08493899		6	13874120	0.00529843	5.68e-08	NR	Island	NR
Liu 2018	2423	AA	Cat	at-risk drinkers vs non-drinkers	cg13224427		15	70546741	0.00314973	1.47e-08	NR		NR
Liu 2018	2423	AA	Cat	at-risk drinkers vs non-drinkers	cg15623573	APBA1	9	72288098	0.000640536	3.95e-08	NR	S_Shore	NR
Liu 2018	2423	AA	Cat	at-risk drinkers vs non-drinkers	cg17707095	RPS6KA2	6	166993541	0.00188222	1.81e-08	NR		NR
Liu 2018	2423	AA	Cat	at-risk drinkers vs non-drinkers	cg19256589		10	122393530	0.00276072	4.67e-08	NR		NR
Liu 2018	2423	AA	Cat	at-risk drinkers vs non-drinkers	cg19939880	TBCD	17	80884963	0.00166076	1.92e-08	NR	N_Shore	NR
Liu 2018	2423	AA	Cat	at-risk drinkers vs non-drinkers	cg22949458	C10orf131	10	97667581	0.00302356	9.89e-08	NR	Island	NR
Liu 2018	2423	AA	Cat	at-risk drinkers vs non-drinkers	cg23248537	RPTOR	17	78809698	0.0030046	3.99e-08	NR		NR
Liu 2018	2423	AA	Cat	at-risk drinkers vs non-drinkers	cg24629438	TRIM71	3	32890738	0.00209496	1.72e-08	NR		NR
Liu 2018	2423	AA	Cat	at-risk drinkers vs non-drinkers	cg24787357	RPL9	4	39457832	0.00177669	1.2e-08	NR	N_Shelf	NR
Liu 2018	2423	AA	Cat	at-risk drinkers vs non-drinkers	cg25365958		13	42615991	0.00480735	9.65e-09	NR	S_Shore	NR
Liu 2018	2423	AA	Cat	at-risk drinkers vs non-drinkers	cg25448407		2	105191693	0.00253372	1.07e-10	NR		NR
Liu 2018	2423	AA	Cat	at-risk drinkers vs non-drinkers	cg26834680		1	111814208	0.00496769	5.06e-08	NR	S_Shore	NR
Liu 2018	2423	AA	Cat	heavy drinkers vs non-drinkers	cg00422488	ANP32B	9	100747767	-0.00845493	1.63e-08	NR	Island	NR
Liu 2018	2423	AA	Cat	heavy drinkers vs non-drinkers	cg00944304	BAHD1	15	40738072	-0.0151181	9.05e-10	NR	S_Shelf	NR
Liu 2018	2423	AA	Cat	heavy drinkers vs non-drinkers	cg01882991		6	6677756	-0.0129637	2.34e-08	NR		NR
Liu 2018	2423	AA	Cat	heavy drinkers vs non-drinkers	cg01899089	AHRR	5	369969	-0.0165533	1.67e-08	NR	N_Shore	NR
Liu 2018	2423	AA	Cat	heavy drinkers vs non-drinkers	cg01901332	ARRB1	11	75031054	-0.0198683	1.94e-09	NR		NR
Liu 2018	2423	AA	Cat	heavy drinkers vs non-drinkers	cg02003183	CDC42BPB	14	103415882	0.0219139	2.31e-09	NR		NR
Liu 2018	2423	AA	Cat	heavy drinkers vs non-drinkers	cg02233149	NEURL3	2	97171243	-0.0142408	6.52e-09	NR	N_Shelf	NR
Liu 2018	2423	AA	Cat	heavy drinkers vs non-drinkers	cg02256576	CES3	16	66995192	-0.020895	6.38e-10	NR		NR
Cronje 2020	108	B	Cont	g/day	cg13153796	SNORD113-6	14	101405628	− 6.78E–04	2.2E–11	NR	NR	TSS1500
Cronje 2020	108	B	Cont	g/day	cg00712390	BAHCC1	17	79373624	8.08E–04	9.7E–10	NR	NR	1stExon
Cronje 2020	108	B	Cont	g/day	cg05706661	LOC101928618	7	36134301	− 1.05E–03	2.0E–09	NR	NR	TSS1500
Cronje 2020	108	B	Cont	g/day	cg24252287		17	40250379	1.48E–04	4.8E–09	NR	NR
Cronje 2020	108	B	Cont	g/day	cg12177743	TTC12	11	113185079	1.59E–04	7.5E–09	NR	NR	TSS200
Cronje 2020	108	B	Cont	g/day	cg19323439	NTN1	17	9136232	5.06E–04	1.9E–08	NR	NR	Body
Cronje 2020	108	B	Cont	g/day	cg19683675	FGF1	5	142077712	− 1.13E–03	2.0E–08	NR	NR	TSS200
Cronje 2020	108	B	Cont	g/day	cg08333974	CACNA2D4	12	1956337	− 1.24E–03	2.2E–08	NR	NR	Body
Cronje 2020	108	B	Cont	g/day	cg12325997	RNF111	15	59280148	9.84E–05	3.2E–08	NR	NR	1stExon
Cronje 2020	108	B	Cont	g/day	cg19642811	LOC101927284	13	95453039	− 6.02E–04	3.4E–08	NR	NR	Body
Cronje 2020	108	B	Cont	g/day	cg06943216		8	102683096	− 1.33E–03	3.5E–08	NR	NR
Cronje 2020	108	B	Cont	g/day	cg26187237	IGFBP2	2	217498574	4.19E–04	3.6E–08	NR	NR	1stExon
Cronje 2020	108	B	Cont	g/day	cg16358446		1	1534984	8.10E–05	4.4E–08	NR	NR
Cronje 2020	108	B	Cont	g/day	cg08724692	EYA4	6	133646558	− 6.26E–04	6.4E–08	NR	NR	Body
Cronje 2020	108	B	Cont	g/day	cg08035774	SARDH	9	136600662	− 1.12E–03	7.5E–08	NR	NR	5′UTR
Cronje 2020	108	B	Cont	g/day	cg18780412	PEX5L	3	179755086	6.36E–04	8.6E–08	NR	NR	TSS1500
Cronje 2020	108	B	Cont	g/day	cg15942324	UTP11L	1	38482118	− 6.63E–04	8.8E–08	NR	NR	Body
Cronje 2020	108	B	Cont	g/day	cg25278025	TMEM182	2	103378026	5.99E–04	8.8E–08	NR	NR	TSS1500
Cronje 2020	108	B	Cont	g/day	cg22572934	LINC01484	5	173171061	− 1.21E–03	9.3E–08	NR	NR	Body
Liu 2018	9643	EA	Cont	g/day	cg00026553	ZNF710	15	90562839	-0.000154797	3.43e-08	NR		NR
Liu 2018	9643	EA	Cont	g/day	cg00045114		1	172674159	0.000249484	2.04e-09	NR		NR
Liu 2018	9643	EA	Cont	g/day	cg00085438	MBNL1	3	152049980	-0.00021381	1.28e-08	NR		NR
Liu 2018	9643	EA	Cont	g/day	cg00247963		16	20863151	-0.000155303	1.3e-09	NR		NR
Liu 2018	9643	EA	Cont	g/day	cg00291478	RGS10	10	121301041	-0.000339377	6.69e-09	NR	N_Shore	NR
Liu 2018	2423	AA	Cont	g/day	cg00291478	RGS10	10	121301041	-6.91e-05	2.87e-08	NR	N_Shore	NR
Liu 2018	9643	EA	Cont	g/day	cg00326958	HNRNPF	10	43892075	-0.000185588	1.76e-08	NR	Island	NR
Liu 2018	9643	EA	Cont	g/day	cg00464927	LRP5	11	68139121	0.000122261	1.24e-08	NR		NR
Liu 2018	9643	EA	Cont	g/day	cg00574412	ABHD15	17	27892866	-0.000166419	1.13e-12	NR	N_Shore	NR
Liu 2018	9643	EA	Cont	g/day	cg00574958	CPT1A	11	68607622	-0.000101269	2.09e-11	NR	N_Shore	NR
Liu 2018	9643	EA	Cont	g/day	cg00594278	GRAP2	22	40296407	-0.000188514	5.78e-09	NR		NR
Liu 2018	9643	EA	Cont	g/day	cg00594278	FAM83F	22	40404957	0.000145633	5.34e-10	NR		NR
Liu 2018	9643	EA	Cont	g/day	cg00622166	GPT2	16	46919021	-0.000265203	4.61e-09	NR	S_Shore	NR
Liu 2018	1251	W: 47; AA: 21; Hisp: 32	Cont	g/day	cg00622166	GPT2	16	46919021	-0.000379	8.4e-08	NR	S_Shore	NR
Liu 2018	9643	EA	Cont	g/day	cg00716257	JDP2	14	75897417	-0.000325731	1.09e-09	NR	S_Shore	NR
Liu 2018	1251	W: 47; AA: 21; Hisp: 32	Cont	g/day	cg00716257	JDP2	14	75897417	-0.000346	8.59e-09	NR	S_Shore	NR
Liu 2018	9643	EA	Cont	g/day	cg00827581	RAVER1	19	10434088	0.00013067	6.59e-11	NR	Island	NR
Liu 2018	9643	EA	Cont	g/day	cg00986580		14	22951241	-0.000245028	3.3e-09	NR		NR
Liu 2018	9643	EA	Cont	g/day	cg01234517	ACTR3C	7	150021553	-9.27e-05	1.85e-11	NR	S_Shore	NR
Liu 2018	9643	EA	Cont	g/day	cg01236573		1	26248897	-0.000200112	3.05e-10	NR	N_Shore	NR
Liu 2018	2423	AA	Cont	g/day	cg01281718	SMAP1	6	71376634	5.49e-05	6e-10	NR	N_Shore	NR
Liu 2018	9643	EA	Cont	g/day	cg01378158	PLEKHG4	16	67312308	-0.000167519	3.11e-08	NR	N_Shore	NR
Liu 2018	2423	AA	Cont	g/day	cg01383911	TRIM39	6	30297627	7.34e-05	1.36e-09	NR	S_Shelf	NR
Liu 2018	9643	EA	Cont	g/day	cg01538969	DHX16	6	30624636	0.000209017	2.24e-10	NR		NR
Liu 2018	9643	EA	Cont	g/day	cg01687189	GNPTAB	12	102225365	-0.000253427	6.39e-10	NR	S_Shore	NR
Liu 2018	9643	EA	Cont	g/day	cg01735398	SLC5A10	17	18907305	-0.000227915	8.36e-08	NR	Island	NR
Liu 2018	9643	EA	Cont	g/day	cg01940273		2	233284934	-0.000455966	1.13e-08	NR	Island	NR
Liu 2018	2423	AA	Cont	g/day	cg01940273		2	233284934	-9.79e-05	3.83e-10	NR	Island	NR
Liu 2018	9643	EA	Cont	g/day	cg01972009	PITPNM1	11	67273431	-0.000190542	8.47e-08	NR	N_Shore	NR
Liu 2018	2423	AA	Cont	g/day	cg02003183	CDC42BPB	14	103415882	0.000104693	6.66e-16	NR		NR
Liu 2018	9643	EA	Cont	g/day	cg02104962		6	31548314	-0.000228001	4.97e-12	NR	N_Shore	NR
Liu 2018	9643	EA	Cont	g/day	cg02231404	SOX18	20	62679635	-0.000312955	2.03e-09	NR	Island	NR
Liu 2018	2423	AA	Cont	g/day	cg02233149	NEURL3	2	97171243	-6.59e-05	2.11e-13	NR	N_Shelf	NR
Liu 2018	9643	EA	Cont	g/day	cg02256576	CES3	16	66995192	-0.00031293	1e-10	NR		NR
Liu 2018	9643	EA	Cont	g/day	cg02314339		10	91020653	-0.000254186	3.06e-08	NR		NR
Liu 2018	9643	EA	Cont	g/day	cg02341119	MGAT5B	17	74866479	-0.000244633	8.15e-09	NR	Island	NR
Liu 2018	9643	EA	Cont	g/day	cg02431260	ESAM	11	124628888	-0.000438112	8.42e-08	NR	Island	NR
Liu 2018	2423	AA	Cont	g/day	cg02448796	KCNAB2	1	6101339	7.79e-05	6.95e-11	NR		NR
Liu 2018	2423	AA	Cont	g/day	cg02504211	C3orf21	3	194815434	4.12e-05	9.09e-08	NR		NR
Liu 2018	9643	EA	Cont	g/day	cg02578470	MCM2	3	127320670	-0.000237701	2.03e-09	NR	N_Shelf	NR
Liu 2018	9643	EA	Cont	g/day	cg02583484	HNRNPA1	12	54677008	-0.000394498	1.57e-19	NR	S_Shelf	NR
Liu 2018	2423	AA	Cont	g/day	cg02583484	HNRNPA1	12	54677008	-9.46e-05	7.35e-17	NR	S_Shelf	NR
Liu 2018	9643	EA	Cont	g/day	cg02654940	HMGA1	6	34206400	-0.000214334	1.45e-09	NR	S_Shore	NR
Liu 2018	9643	EA	Cont	g/day	cg02711608	SLC1A5	19	47287964	-0.0004127	2.43e-11	NR	N_Shelf	NR
Liu 2018	1251	W: 47; AA: 21; Hisp: 32	Cont	g/day	cg02711608	SLC1A5	19	47287964	-0.000419	3.97e-08	NR	N_Shelf	NR
Liu 2018	9643	EA	Cont	g/day	cg02719954		8	23830907	-0.000274083	5.27e-11	NR		NR
Liu 2018	2423	AA	Cont	g/day	cg03044573	GAS5	1	173835265	-0.000125978	9.71e-10	NR	N_Shore	NR
Liu 2018	9643	EA	Cont	g/day	cg03068497	GARS	7	30635838	-0.000768697	2.58e-10	NR	S_Shore	NR
Liu 2018	2423	AA	Cont	g/day	cg03149958		6	36326677	-7.06e-05	2.25e-09	NR		NR
Liu 2018	9643	EA	Cont	g/day	cg03184011		20	39945503	-0.000139723	1.13e-10	NR	N_Shore	NR
Liu 2018	9643	EA	Cont	g/day	cg03260624	CDC7	1	91970722	-0.000242304	8.77e-11	NR	S_Shelf	NR
Liu 2018	9643	EA	Cont	g/day	cg03329539		2	233283329	-0.000229792	3.6e-09	NR	N_Shore	NR
Liu 2018	2423	AA	Cont	g/day	cg03329539		2	233283329	-6.34e-05	9.43e-08	NR	N_Shore	NR
Liu 2018	9643	EA	Cont	g/day	cg03339609	LSM14A	19	34662636	-0.000301051	2.66e-08	NR	N_Shore	NR
Liu 2018	2423	AA	Cont	g/day	cg03366574		7	2764599	4.56e-05	8e-08	NR		NR
Liu 2018	9643	EA	Cont	g/day	cg03450635	FAM198B	4	159094213	-0.000225637	9.44e-08	NR		NR
Liu 2018	2423	AA	Cont	g/day	cg03450842	ZMIZ1	10	80834947	-5.95e-05	1.18e-09	NR		NR
Liu 2018	9643	EA	Cont	g/day	cg03497652	ANKS3	16	4751569	0.000222415	1.27e-10	NR		NR
Liu 2018	2423	AA	Cont	g/day	cg03497652	ANKS3	16	4751569	0.000106879	5.59e-18	NR		NR
Liu 2018	9643	EA	Cont	g/day	cg03523740	TXLNA	1	32645027	-0.000216633	4.44e-15	NR	N_Shore	NR
Liu 2018	9643	EA	Cont	g/day	cg03599037	C10orf58	10	82172508	-0.000136129	4.51e-13	NR	S_Shelf	NR
Liu 2018	9643	EA	Cont	g/day	cg03627290	PNKD	2	219155248	-0.000109782	1.12e-08	NR	N_Shore	NR
Liu 2018	9643	EA	Cont	g/day	cg03877174	KIF1C	17	4923126	0.000131267	7.3e-08	NR		NR
Liu 2018	2423	AA	Cont	g/day	cg03935116	FAM60A	12	31476565	-3.52e-05	3.8e-09	NR	N_Shore	NR
Liu 2018	9643	EA	Cont	g/day	cg03959515	FAM84B	8	127569677	-0.000106696	3.9e-08	NR	Island	NR
Liu 2018	2423	AA	Cont	g/day	cg03991871	AHRR	5	368447	-4.79e-05	5.51e-08	NR	N_Shore	NR
Liu 2018	9643	EA	Cont	g/day	cg03997643	RNU6ATAC	9	137030726	-0.000214019	1.44e-11	NR	S_Shore	NR
Liu 2018	9643	EA	Cont	g/day	cg04172771	SNTG1	8	50892702	-0.000264704	8.63e-10	NR		NR
Liu 2018	9643	EA	Cont	g/day	cg04418434	RREB1	6	7110773	-0.000133156	2.25e-08	NR	S_Shore	NR
Liu 2018	2423	AA	Cont	g/day	cg04423209	SH2D6	2	85663660	3.97e-05	4.25e-08	NR	N_Shore	NR
Liu 2018	9643	EA	Cont	g/day	cg04460609	LDB2	4	16532808	-0.000371151	1.23e-08	NR		NR
Liu 2018	9643	EA	Cont	g/day	cg04605617	PLA2G2C	1	20501558	-0.000259599	5.19e-08	NR		NR
Liu 2018	9643	EA	Cont	g/day	cg04610235	MTMR4	17	56592440	-0.000131691	4.58e-09	NR	S_Shore	NR
Liu 2018	9643	EA	Cont	g/day	cg04737759		6	155253937	0.000101883	1.59e-08	NR		NR
Liu 2018	2423	AA	Cont	g/day	cg04740898	BZRAP1	17	56402669	-6.77e-05	5.99e-10	NR	S_Shore	NR
Liu 2018	2423	AA	Cont	g/day	cg04885881		1	11123118	-9.12e-05	3.07e-09	NR	S_Shelf	NR
Liu 2018	9643	EA	Cont	g/day	cg04916802	MIR548F5	13	36052985	-0.000196928	6.33e-09	NR	Island	NR
Liu 2018	2423	AA	Cont	g/day	cg04944536		12	116756890	3.98e-05	4.97e-08	NR		NR
Liu 2018	2423	AA	Cont	g/day	cg04987734	CDC42BPB	14	103415873	9.78e-05	2.4e-11	NR		NR
Liu 2018	9643	EA	Cont	g/day	cg05012902	VAMP2	17	8065517	-0.000165956	4.41e-09	NR	N_Shore	NR
Liu 2018	2423	AA	Cont	g/day	cg05089897	DYRK1A	21	38886664	6.66e-05	1.65e-10	NR		NR
Liu 2018	9643	EA	Cont	g/day	cg05262369	NUCKS1	1	205716365	-0.000159431	2.41e-08	NR	N_Shore	NR
Liu 2018	2423	AA	Cont	g/day	cg05284742	ITPK1	14	93552128	-3.8e-05	8.2e-08	NR		NR
Liu 2018	9643	EA	Cont	g/day	cg05356319	NFIX	19	13122449	-0.000359577	9.08e-08	NR	Island	NR
Liu 2018	9643	EA	Cont	g/day	cg05359207	ZNF217	20	52196506	-5.5e-05	5.69e-08	NR	N_Shore	NR
Liu 2018	9643	EA	Cont	g/day	cg05413305		17	79366851	-0.000256816	5.35e-13	NR	Island	NR
Liu 2018	9643	EA	Cont	g/day	cg05512483	SNORD30	11	62621791	-0.000345024	9.89e-12	NR	N_Shore	NR
Liu 2018	2423	AA	Cont	g/day	cg05512483	SNORD30	11	62621791	-4.78e-05	5.12e-08	NR	N_Shore	NR
Liu 2018	2423	AA	Cont	g/day	cg05523603		22	50973101	-9.61e-05	2.38e-11	NR	S_Shelf	NR
Liu 2018	9643	EA	Cont	g/day	cg05527044		2	73510851	-0.000115123	2.5e-08	NR	N_Shore	NR
Liu 2018	9643	EA	Cont	g/day	cg05603985	SKI	1	2161049	-0.000253797	1.94e-08	NR	Island	NR
Liu 2018	2423	AA	Cont	g/day	cg05603985	SKI	1	2161049	-5.61e-05	7.86e-13	NR	Island	NR
Liu 2018	9643	EA	Cont	g/day	cg05649922	ARID1A	1	27029290	-0.000210145	7.67e-12	NR		NR
Liu 2018	9643	EA	Cont	g/day	cg05668853	RAB34	17	27044169	-0.000200714	2.68e-08	NR	Island	NR
Liu 2018	9643	EA	Cont	g/day	cg05721773	FAIM3	1	207083336	-0.000175489	5.08e-09	NR	S_Shore	NR
Liu 2018	9643	EA	Cont	g/day	cg05751148	PTPRCAP	11	67204799	0.000134007	6.5e-08	NR	S_Shore	NR
Liu 2018	9643	EA	Cont	g/day	cg05903736	HDAC4	2	240197131	-0.000164016	2.89e-09	NR	S_Shore	NR
Liu 2018	9643	EA	Cont	g/day	cg05915866	ZFHX3	16	73090838	-0.000261383	2e-08	NR	N_Shore	NR
Liu 2018	9643	EA	Cont	g/day	cg05951221		2	233284402	-0.000605113	4.39e-08	NR	Island	NR
Liu 2018	9643	EA	Cont	g/day	cg05991220	ITIH1	3	52813859	0.000217716	3.98e-08	NR		NR
Liu 2018	2423	AA	Cont	g/day	cg06121808	SLC20A1	2	113404678	-5.58e-05	2.95e-08	NR	S_Shore	NR
Liu 2018	9643	EA	Cont	g/day	cg06126421		6	30720080	-0.000286062	6.99e-08	NR		NR
Liu 2018	2423	AA	Cont	g/day	cg06188083	IFIT3	10	91093005	-0.000102437	9.99e-10	NR		NR
Liu 2018	9643	EA	Cont	g/day	cg06226150	SLC2A4RG	20	62369956	-0.000141288	3.79e-08	NR	Island	NR
Liu 2018	2423	AA	Cont	g/day	cg06230847	TRIM39	6	30297594	6.37e-05	1.22e-09	NR	S_Shelf	NR
Liu 2018	9643	EA	Cont	g/day	cg06469895	TERF2	16	69418206	-0.000204884	1.52e-13	NR	N_Shore	NR
Liu 2018	9643	EA	Cont	g/day	cg06644515	SNORD47	1	173834831	-0.000365342	2.3e-09	NR	N_Shelf	NR
Liu 2018	2423	AA	Cont	g/day	cg06682445	URGCP	7	43915791	5.15e-05	3.96e-08	NR		NR
Liu 2018	9643	EA	Cont	g/day	cg06690548	SLC7A11	4	139162808	-0.00133477	3.86e-09	NR		NR
Liu 2018	1251	W: 47; AA: 21; Hisp: 32	Cont	g/day	cg06690548	SLC7A11	4	139162808	-0.00107	1.24e-31	NR		NR
Liu 2018	9643	EA	Cont	g/day	cg06799321	CES3	16	66995143	-0.000220922	9.02e-08	NR		NR
Liu 2018	2423	AA	Cont	g/day	cg06826457		12	12867669	-6.38e-05	2.13e-09	NR	N_Shelf	NR
Liu 2018	9643	EA	Cont	g/day	cg06846495	NCL	2	232326668	-0.000233729	1.86e-09	NR	N_Shore	NR
Liu 2018	9643	EA	Cont	g/day	cg06934523	KIAA0247	14	70077930	-0.00020561	1.76e-08	NR	N_Shore	NR
Liu 2018	9643	EA	Cont	g/day	cg06980173	IL6R	1	154376344	-0.000173694	1.05e-08	NR	N_Shore	NR
Liu 2018	9643	EA	Cont	g/day	cg06983052	LRRC8D	1	90288099	-0.000311866	2.39e-10	NR	S_Shore	NR
Liu 2018	1251	W: 47; AA: 21; Hisp: 32	Cont	g/day	cg06983052	LRRC8D	1	90288099	-0.00036	7.81e-09	NR	S_Shore	NR
Liu 2018	2423	AA	Cont	g/day	cg07021906	SLC7A5	16	87866833	7.72e-05	2.24e-13	NR		NR
Liu 2018	9643	EA	Cont	g/day	cg07091481	C10orf58	10	82169149	-0.000193968	8.22e-10	NR	S_Shore	NR
Liu 2018	9643	EA	Cont	g/day	cg07104958	ANUBL1	10	46168551	-0.00026315	5.27e-09	NR	Island	NR
Liu 2018	9643	EA	Cont	g/day	cg07176692	SLC16A1	1	113500329	-0.00031186	1.01e-09	NR	S_Shore	NR
Liu 2018	9643	EA	Cont	g/day	cg07251887	LOC100130933	17	73641809	-0.000282616	7.56e-12	NR		NR
Liu 2018	9643	EA	Cont	g/day	cg07286682	MIR548H4	15	69447132	0.000197101	2.39e-08	NR		NR
Liu 2018	2423	AA	Cont	g/day	cg07375256	ZNF498	7	99222196	7.98e-05	1.68e-10	NR		NR
Liu 2018	9643	EA	Cont	g/day	cg07567724	GATAD2B	1	153777721	-0.000346834	1.43e-08	NR		NR
Liu 2018	9643	EA	Cont	g/day	cg07626482	SLC1A5	19	47289503	-0.000335371	8.39e-08	NR	N_Shore	NR
Liu 2018	9643	EA	Cont	g/day	cg07797660	PRDM16	1	3239139	-0.000232051	4.75e-11	NR	N_Shore	NR
Liu 2018	2423	AA	Cont	g/day	cg07945582	NFE2L3	7	26206579	-6.61e-05	5.37e-08	NR		NR
Liu 2018	9643	EA	Cont	g/day	cg08062273	LIMD1	3	45641120	-0.000109838	3.61e-08	NR		NR
Liu 2018	9643	EA	Cont	g/day	cg08115371	ODZ4	11	79115706	-0.000394429	1.44e-09	NR		NR
Liu 2018	9643	EA	Cont	g/day	cg08276755		20	30196714	-0.000159783	6.54e-08	NR	S_Shore	NR
Liu 2018	2423	AA	Cont	g/day	cg08289839	CARS2	13	111318640	5.23e-05	6.16e-09	NR		NR
Liu 2018	9643	EA	Cont	g/day	cg08293528	CDH23	10	73565688	-0.000143323	5.17e-08	NR	Island	NR
Liu 2018	9643	EA	Cont	g/day	cg08297686	RAD51L1	14	68943486	-0.000334244	4.68e-08	NR		NR
Liu 2018	9643	EA	Cont	g/day	cg08335767	HMGA1	6	34206495	-0.000189721	4.75e-09	NR	S_Shore	NR
Liu 2018	2423	AA	Cont	g/day	cg08504583	SLAIN1	13	78315584	8.82e-05	1.06e-09	NR		NR
Liu 2018	9643	EA	Cont	g/day	cg08559712	MACROD2	20	16030674	0.00021938	2.31e-10	NR		NR
Liu 2018	9643	EA	Cont	g/day	cg08687540	LSP1	11	1890204	0.00013942	8.93e-09	NR	N_Shore	NR
Liu 2018	2423	AA	Cont	g/day	cg09018739	CPNE2	16	57180107	5.95e-05	4.36e-08	NR		NR
Liu 2018	9643	EA	Cont	g/day	cg09175009	FAM18A	16	10912699	-0.000197238	4.87e-08	NR	Island	NR
Liu 2018	9643	EA	Cont	g/day	cg09257526	IL6R	1	154379696	-0.00012733	1.8e-09	NR	S_Shore	NR
Liu 2018	9643	EA	Cont	g/day	cg09326440	HLA-E	6	30458161	-7.55e-05	2.71e-10	NR	Island	NR
Liu 2018	9643	EA	Cont	g/day	cg09448652	SNORD30	11	62621367	-0.000257449	1.27e-12	NR	N_Shore	NR
Liu 2018	2423	AA	Cont	g/day	cg09481056	ABCA3	16	2339260	4.51e-05	5.16e-08	NR	Island	NR
Liu 2018	9643	EA	Cont	g/day	cg09577455	GABBR1	6	29593382	-0.000155485	2.97e-08	NR	N_Shore	NR
Liu 2018	9643	EA	Cont	g/day	cg09613192		2	181388538	-0.000278778	1.87e-08	NR		NR
Liu 2018	9643	EA	Cont	g/day	cg09646173	PDE6A	5	149317669	-0.000287911	6.18e-08	NR		NR
Liu 2018	2423	AA	Cont	g/day	cg09701700	MIR146B	10	104194843	-7.39e-05	1.25e-08	NR	S_Shelf	NR
Liu 2018	9643	EA	Cont	g/day	cg09737197	CPT1A	11	68607675	-0.00016211	5.03e-13	NR	N_Shore	NR
Liu 2018	9643	EA	Cont	g/day	cg09906145	FAM65A	16	67562424	-9.78e-05	2.81e-08	NR	N_Shore	NR
Liu 2018	2423	AA	Cont	g/day	cg09940677	CDC42BPB	14	103415458	5.7e-05	2.39e-10	NR		NR
Liu 2018	9643	EA	Cont	g/day	cg10089657	C7orf50	7	1062820	0.000122239	1.66e-08	NR	Island	NR
Liu 2018	9643	EA	Cont	g/day	cg10317175		10	25247855	-0.000179648	7.53e-10	NR		NR
Liu 2018	2423	AA	Cont	g/day	cg10317175		10	25247855	-5.17e-05	6.91e-08	NR		NR
Liu 2018	2423	AA	Cont	g/day	cg10401362	DNAJB6	7	157185402	7.54e-05	6.04e-13	NR		NR
Liu 2018	2423	AA	Cont	g/day	cg10439456	TRIM69	15	45028270	-0.000108325	1e-08	NR		NR
Liu 2018	9643	EA	Cont	g/day	cg10554624	ECHDC2	1	53386618	-0.000214178	8.62e-09	NR	Island	NR
Liu 2018	9643	EA	Cont	g/day	cg10589813		20	48809978	-0.00043552	7.18e-10	NR	S_Shore	NR
Liu 2018	2423	AA	Cont	g/day	cg10691866	TPST1	7	65817282	-0.000100224	3.21e-10	NR		NR
Liu 2018	9643	EA	Cont	g/day	cg10750182	C10orf105	10	73497514	-0.000133251	1.04e-10	NR		NR
Liu 2018	9643	EA	Cont	g/day	cg10816169		11	66080868	-0.000272511	1.02e-09	NR	Island	NR
Liu 2018	2423	AA	Cont	g/day	cg10850792		15	89531046	5.47e-05	2.64e-08	NR		NR
Liu 2018	2423	AA	Cont	g/day	cg11077171	ARID3B	15	74881051	3.51e-05	2.05e-08	NR		NR
Liu 2018	9643	EA	Cont	g/day	cg11194994	PEA15	1	160175974	-0.000171208	7.33e-15	NR	S_Shore	NR
Liu 2018	9643	EA	Cont	g/day	cg11197916		1	26249040	-0.000159894	4.14e-09	NR	N_Shore	NR
Liu 2018	9643	EA	Cont	g/day	cg11376147	SLC43A1	11	57261198	-0.00025796	9.8e-13	NR		NR
Liu 2018	2423	AA	Cont	g/day	cg11376147	SLC43A1	11	57261198	-3.6e-05	2.23e-10	NR		NR
Liu 2018	1251	W: 47; AA: 21; Hisp: 32	Cont	g/day	cg11376147	SLC43A1	11	57261198	-0.000579	1.26e-22	NR		NR
Liu 2018	9643	EA	Cont	g/day	cg11405200		6	14212128	-0.000161143	4.66e-08	NR	S_Shore	NR
Liu 2018	2423	AA	Cont	g/day	cg11436113		20	19191145	-6.35e-05	2.71e-08	NR	N_Shore	NR
Liu 2018	2423	AA	Cont	g/day	cg11460110	PRR3	6	30530458	4.29e-05	2.37e-09	NR		NR
Liu 2018	9643	EA	Cont	g/day	cg11555067	INPP4A	2	99081350	-0.000185638	1.75e-09	NR		NR
Liu 2018	2423	AA	Cont	g/day	cg11594821	HLA-E	6	30458601	-6.31e-05	7.9e-08	NR	S_Shore	NR
Liu 2018	9643	EA	Cont	g/day	cg11700584	RPL36AL	14	50088544	-0.000273901	5.3e-08	NR	S_Shore	NR
Liu 2018	9643	EA	Cont	g/day	cg11704631	RUNX1	21	36395663	-0.000321075	6.7e-08	NR	N_Shelf	NR
Liu 2018	2423	AA	Cont	g/day	cg11832534	WDR8	1	3563998	3.57e-05	3.17e-09	NR	N_Shelf	NR
Liu 2018	2423	AA	Cont	g/day	cg12075928	PTK2	8	141801307	-9.34e-05	5.67e-10	NR		NR
Liu 2018	2423	AA	Cont	g/day	cg12116137	PRPF8	17	1576449	7.72e-05	6.24e-09	NR		NR
Liu 2018	9643	EA	Cont	g/day	cg12616487	ROM1	11	62379063	-0.000167865	2.1e-11	NR	N_Shore	NR
Liu 2018	9643	EA	Cont	g/day	cg12754982	IGF2R	6	160409942	-0.000175109	1.56e-08	NR		NR
Liu 2018	9643	EA	Cont	g/day	cg12807764		5	146864669	-0.000256786	5e-09	NR		NR
Liu 2018	9643	EA	Cont	g/day	cg12825509	TRA2B	3	185648568	-0.000524478	2.96e-10	NR		NR
Liu 2018	9643	EA	Cont	g/day	cg12866859	HEXIM1	17	43224332	-0.000183138	8.32e-09	NR	N_Shore	NR
Liu 2018	9643	EA	Cont	g/day	cg12873476		8	142402728	-0.000232506	2.8e-12	NR	S_Shore	NR
Liu 2018	9643	EA	Cont	g/day	cg13077865		8	105655901	0.000173048	3.87e-08	NR		NR
Liu 2018	9643	EA	Cont	g/day	cg13127741	COMMD7	20	31331821	-0.000229919	3.1e-12	NR	S_Shore	NR
Liu 2018	9643	EA	Cont	g/day	cg13442969	DYRK2	12	68044208	-0.000362448	8.68e-10	NR	S_Shore	NR
Liu 2018	1251	W: 47; AA: 21; Hisp: 32	Cont	g/day	cg13526915		14	24164078	-0.000366	5.12e-10	NR		NR
Liu 2018	9643	EA	Cont	g/day	cg13539253		9	130007838	-7.35e-05	5.08e-08	NR	S_Shore	NR
Liu 2018	2423	AA	Cont	g/day	cg13549638	RPTOR	17	78860076	7.38e-05	9.7e-10	NR	N_Shelf	NR
Liu 2018	2423	AA	Cont	g/day	cg13645530		12	116756948	4.96e-05	6.65e-08	NR		NR
Liu 2018	2423	AA	Cont	g/day	cg13876222	NOTCH1	9	139399348	6.25e-05	1.64e-12	NR	Island	NR
Liu 2018	9643	EA	Cont	g/day	cg13879047	GRB10	7	50774217	-0.000111936	1.26e-08	NR		NR
Liu 2018	9643	EA	Cont	g/day	cg14034325	HNRNPF	10	43891459	-0.000235275	5.18e-11	NR	N_Shore	NR
Liu 2018	2423	AA	Cont	g/day	cg14099685	CUGBP1	11	47546068	-4.87e-05	3.96e-10	NR		NR
Liu 2018	9643	EA	Cont	g/day	cg14145074	ACTB	7	5567891	-0.000142457	1.02e-08	NR	N_Shore	NR
Liu 2018	9643	EA	Cont	g/day	cg14330293	MYO1C	17	1374051	0.000128562	1.03e-08	NR	N_Shore	NR
Liu 2018	9643	EA	Cont	g/day	cg14476101	PHGDH	1	120255992	-0.000940588	3.69e-10	NR	S_Shore	NR
Liu 2018	1251	W: 47; AA: 21; Hisp: 32	Cont	g/day	cg14476101	PHGDH	1	120255992	-0.000714	6.62e-09	NR	S_Shore	NR
Liu 2018	9643	EA	Cont	g/day	cg14482712		15	40348303	-0.000178625	7.71e-12	NR		NR
Liu 2018	2423	AA	Cont	g/day	cg14615927	HDAC4	2	240259213	5.76e-05	1.13e-10	NR		NR
Liu 2018	2423	AA	Cont	g/day	cg14741228	FAM60A	12	31476479	-3.92e-05	3.8e-10	NR	N_Shore	NR
Liu 2018	2423	AA	Cont	g/day	cg14827056	EIF2C2	8	141550539	3.69e-05	6.58e-09	NR		NR
Liu 2018	2423	AA	Cont	g/day	cg15022400	TRIM69	15	45028161	-6.4e-05	8.66e-08	NR		NR
Liu 2018	9643	EA	Cont	g/day	cg15059065	NR2F6	19	17354961	-0.000242701	1.24e-09	NR	N_Shore	NR
Liu 2018	9643	EA	Cont	g/day	cg15117681	CSNK1D	17	80202426	0.00013987	2.59e-08	NR	N_Shore	NR
Liu 2018	2423	AA	Cont	g/day	cg15317375	ZNF275	X	152608863	-5.04e-05	3.43e-08	NR	N_Shelf	NR
Liu 2018	2423	AA	Cont	g/day	cg15705813		2	70297499	-6.83e-05	3.46e-11	NR		NR
Liu 2018	9643	EA	Cont	g/day	cg15804598	HEXIM1	17	43224418	-0.000228213	4.65e-09	NR	N_Shore	NR
Liu 2018	9643	EA	Cont	g/day	cg15821562	FOXN3	14	90083275	-0.000246252	1.42e-09	NR	N_Shelf	NR
Liu 2018	9643	EA	Cont	g/day	cg15827092		14	83600849	-0.000294369	5.48e-10	NR		NR
Liu 2018	9643	EA	Cont	g/day	cg15890469	PGF	14	75408846	-0.000238749	5.1e-08	NR		NR
Liu 2018	9643	EA	Cont	g/day	cg16246545	PHGDH	1	120255941	-0.000605981	1.54e-12	NR	S_Shore	NR
Liu 2018	9643	EA	Cont	g/day	cg16290996	GAS5	1	173835989	-0.000319806	2.61e-08	NR	N_Shore	NR
Liu 2018	2423	AA	Cont	g/day	cg16395997	WDR8	1	3562798	6.99e-05	8.88e-09	NR	S_Shore	NR
Liu 2018	2423	AA	Cont	g/day	cg16411857	NLRC5	16	57023191	-8.54e-05	4.54e-09	NR	Island	NR
Liu 2018	9643	EA	Cont	g/day	cg16505233	EDEM1	3	5239311	-9.5e-05	5.69e-08	NR		NR
Liu 2018	9643	EA	Cont	g/day	cg16568360	TAOK2	16	29987261	-0.000111562	2.25e-09	NR	S_Shore	NR
Liu 2018	9643	EA	Cont	g/day	cg16696035	FLCN	17	17126176	8.68e-05	3.49e-08	NR	S_Shore	NR
Liu 2018	9643	EA	Cont	g/day	cg16702313	C14orf43	14	74251926	-0.000158351	1.04e-11	NR	N_Shore	NR
Liu 2018	9643	EA	Cont	g/day	cg16705273	SETBP1	18	42262885	-0.000250798	5.28e-13	NR	S_Shelf	NR
Liu 2018	2423	AA	Cont	g/day	cg16743273	MOBKL2A	19	2076833	4.56e-05	2.5e-12	NR	Island	NR
Liu 2018	9643	EA	Cont	g/day	cg17058475	CPT1A	11	68607737	-0.000161893	8.5e-13	NR	N_Shore	NR
Liu 2018	9643	EA	Cont	g/day	cg17192599	PRKAG2	7	151504864	0.000193391	2.8e-09	NR		NR
Liu 2018	9643	EA	Cont	g/day	cg17378803		2	242823275	-0.00024546	2.98e-08	NR	N_Shore	NR
Liu 2018	9643	EA	Cont	g/day	cg17390562	EZR	6	159238463	-0.000140907	1.59e-09	NR	N_Shore	NR
Liu 2018	9643	EA	Cont	g/day	cg17485681	CDH23	10	73565625	-0.000230398	1.51e-08	NR	Island	NR
Liu 2018	2423	AA	Cont	g/day	cg17588003	C17orf87	17	5138696	5.94e-05	1.78e-08	NR		NR
Liu 2018	2423	AA	Cont	g/day	cg17723958	CCDC92	12	124429295	6.55e-05	2.17e-08	NR		NR
Liu 2018	9643	EA	Cont	g/day	cg17768768	CARD11	7	2948123	0.000133472	5.88e-09	NR	S_Shore	NR
Liu 2018	9643	EA	Cont	g/day	cg17865955	ITPR3	6	33601177	-0.000210619	7e-10	NR	Island	NR
Liu 2018	9643	EA	Cont	g/day	cg17962756		5	172769199	-0.000403039	8.18e-08	NR		NR
Liu 2018	9643	EA	Cont	g/day	cg18018313	IRS1	2	227657192	-0.000234742	5.75e-08	NR	S_Shore	NR
Liu 2018	2423	AA	Cont	g/day	cg18062721	VGLL4	3	11643427	7.7e-05	2.5e-09	NR		NR
Liu 2018	9643	EA	Cont	g/day	cg18120259	LOC100132354	6	43894639	-0.00052297	3.04e-09	NR		NR
Liu 2018	9643	EA	Cont	g/day	cg18125510	WARS	14	100841768	-0.00034229	6.17e-10	NR	N_Shore	NR
Liu 2018	9643	EA	Cont	g/day	cg18159646	SNORD22	11	62621178	-0.000256959	1.45e-09	NR	N_Shelf	NR
Liu 2018	2423	AA	Cont	g/day	cg18181703	SOCS3	17	76354621	-8.36e-05	9.17e-11	NR	N_Shore	NR
Liu 2018	9643	EA	Cont	g/day	cg18336453	PTK7	6	43082296	-0.000331161	4.84e-10	NR		NR
Liu 2018	1251	W: 47; AA: 21; Hisp: 32	Cont	g/day	cg18336453	PTK7	6	43082296	-0.000423	6.58e-09	NR		NR
Liu 2018	2423	AA	Cont	g/day	cg18349022	ZNF498	7	99222459	7.67e-05	3.58e-11	NR		NR
Liu 2018	9643	EA	Cont	g/day	cg18394552		5	159428643	0.000367256	3.03e-09	NR		NR
Liu 2018	9643	EA	Cont	g/day	cg18482892	ARHGEF3	3	56833426	-0.000225543	1.15e-08	NR	N_Shelf	NR
Liu 2018	2423	AA	Cont	g/day	cg18524934	NEURL3	2	97164073	-4.35e-05	1.89e-08	NR	N_Shelf	NR
Liu 2018	9643	EA	Cont	g/day	cg18530324	KIAA0427	18	46064992	-0.000173123	4.34e-09	NR	N_Shore	NR
Liu 2018	9643	EA	Cont	g/day	cg18590502	CCDC71	3	49203081	-0.000329032	2.83e-10	NR	N_Shore	NR
Liu 2018	9643	EA	Cont	g/day	cg18763536	ETV6	12	11812062	-0.000262462	9.94e-08	NR		NR
Liu 2018	9643	EA	Cont	g/day	cg18765542	DGKZ	11	46354101	-0.000142943	2.28e-09	NR	Island	NR
Liu 2018	2423	AA	Cont	g/day	cg18917643		5	39476124	-7.18e-05	3.56e-12	NR		NR
Liu 2018	2423	AA	Cont	g/day	cg19089328	NADSYN1	11	71210210	8.44e-05	9.57e-09	NR		NR
Liu 2018	9643	EA	Cont	g/day	cg19202384	PYCR1	17	79894511	-0.000261545	4.55e-08	NR	N_Shore	NR
Liu 2018	9643	EA	Cont	g/day	cg19238380	LMNA	1	156093948	-0.000294514	2.24e-12	NR		NR
Liu 2018	9643	EA	Cont	g/day	cg19240637	RNF144A	2	7172297	-0.000223937	3.21e-09	NR	Island	NR
Liu 2018	9643	EA	Cont	g/day	cg19266329		1	145456128	-0.000278274	1.65e-13	NR		NR
Liu 2018	9643	EA	Cont	g/day	cg19390658	GARS	7	30636176	-0.000583007	9.18e-09	NR	S_Shore	NR
Liu 2018	2423	AA	Cont	g/day	cg19427338		2	42566455	4.3e-05	1.23e-08	NR		NR
Liu 2018	9643	EA	Cont	g/day	cg00812770		1	1073510	0.000127112	1.82e-09	NR	S_Shore	NR
Liu 2018	9643	EA	Cont	g/day	cg04781796	GABRD	1	1959747	0.000201398	1.93e-09	NR	Island	NR
Liu 2018	9643	EA	Cont	g/day	cg01979157	SKI	1	2161013	-0.000156298	5.94e-12	NR	Island	NR
Liu 2018	9643	EA	Cont	g/day	cg22510139	PRDM16	1	3058822	-0.000239165	1.29e-08	NR	N_Shore	NR
Liu 2018	9643	EA	Cont	g/day	cg21848084	PRDM16	1	3264381	0.000149616	5.49e-08	NR		NR
Liu 2018	9643	EA	Cont	g/day	cg00546117	RERE	1	8445545	-0.000207682	7.33e-08	NR		NR
Liu 2018	9643	EA	Cont	g/day	cg03617456	EXOSC10	1	11160205	-9.87e-05	2.68e-08	NR	S_Shore	NR
Liu 2018	9643	EA	Cont	g/day	cg07180646	TMEM51	1	15481541	-0.000229401	4.13e-09	NR	S_Shore	NR
Liu 2018	9643	EA	Cont	g/day	cg05129477	KIF17	1	21044945	-0.00023488	5.6e-08	NR	S_Shore	NR
Liu 2018	9643	EA	Cont	g/day	cg02343604	ID3	1	23884703	-0.000152012	5.75e-08	NR	N_Shore	NR
Liu 2018	9643	EA	Cont	g/day	cg17164905	AHDC1	1	27931310	-0.00013746	1.17e-08	NR	S_Shore	NR
Liu 2018	9643	EA	Cont	g/day	cg11980897		1	32237457	-0.000136188	9.37e-08	NR	N_Shore	NR
Liu 2018	9643	EA	Cont	g/day	cg24141382	CTPS	1	41446726	-0.000150319	6.43e-08	NR	S_Shore	NR
Liu 2018	2423	AA	Cont	g/day	cg19534753	MYLK	3	123340306	-3.46e-05	3.62e-08	NR		NR
Liu 2018	9643	EA	Cont	g/day	cg19554457	NUDT4	12	93774772	-0.000234466	1.28e-08	NR	S_Shelf	NR
Liu 2018	9643	EA	Cont	g/day	cg19572487	RARA	17	38476024	-0.000247754	5.6e-10	NR	S_Shore	NR
Liu 2018	9643	EA	Cont	g/day	cg05756780	IL6R	1	154380705	-0.00014366	3.98e-08	NR	S_Shelf	NR
Liu 2018	9643	EA	Cont	g/day	cg22505006	ZBTB7B	1	154981829	-0.000163279	1.28e-08	NR		NR
Liu 2018	9643	EA	Cont	g/day	cg09182138	BCAN	1	156612436	-0.000154312	3.6e-09	NR	Island	NR
Liu 2018	9643	EA	Cont	g/day	cg19578183		2	128991530	-0.000248248	3.33e-09	NR	S_Shore	NR
Liu 2018	9643	EA	Cont	g/day	cg00313914	NAV1	1	201618901	-0.000446595	9.89e-08	NR	Island	NR
Liu 2018	9643	EA	Cont	g/day	cg12067421		1	203246482	-0.000147351	1.34e-09	NR	S_Shelf	NR
Liu 2018	9643	EA	Cont	g/day	cg10456541		2	8721512	-0.000190486	2.69e-08	NR	N_Shelf	NR
Liu 2018	9643	EA	Cont	g/day	cg14274621		2	8825107	-0.000137268	6.67e-09	NR	Island	NR
Liu 2018	9643	EA	Cont	g/day	cg07502661		2	43398339	-0.000187111	2.6e-12	NR	S_Shore	NR
Liu 2018	9643	EA	Cont	g/day	cg00883689	SPTBN1	2	54802904	-0.000284744	3.23e-12	NR		NR
Liu 2018	9643	EA	Cont	g/day	cg19693031	TXNIP	1	145441552	-0.000439381	1.02e-11	NR		NR
Liu 2018	9643	EA	Cont	g/day	cg06096336	PSMD1	2	231989800	-0.000266204	1.24e-10	NR		NR
Liu 2018	9643	EA	Cont	g/day	cg24642820	NUP210	3	13462465	-0.000302378	9.53e-09	NR	S_Shore	NR
Liu 2018	9643	EA	Cont	g/day	cg14473743	NUP210	3	13462496	-0.000260987	3.38e-09	NR	S_Shore	NR
Liu 2018	9643	EA	Cont	g/day	cg18483487		3	45208900	-0.00020568	2.42e-08	NR		NR
Liu 2018	9643	EA	Cont	g/day	cg27386529	SCAP	3	47517807	-0.000198814	2.61e-09	NR	S_Shore	NR
Liu 2018	9643	EA	Cont	g/day	cg19731612	NSD1	5	176559334	-0.00062134	3.8e-08	NR	Island	NR
Liu 2018	9643	EA	Cont	g/day	cg14035045	HEMK1	3	50606289	-0.000169382	1.85e-08	NR	N_Shore	NR
Liu 2018	9643	EA	Cont	g/day	cg12554573	PARP3	3	51976667	-0.000141513	1.79e-08	NR	S_Shore	NR
Liu 2018	9643	EA	Cont	g/day	cg18328933	ABHD14B	3	52008538	-0.000120354	6.55e-10	NR	N_Shore	NR
Liu 2018	9643	EA	Cont	g/day	cg22631938	EIF4E3	3	71802420	-0.000232342	3.99e-11	NR	N_Shore	NR
Liu 2018	9643	EA	Cont	g/day	cg17185710	MBNL1	3	151984822	-0.000212375	8.1e-12	NR	N_Shore	NR
Liu 2018	2423	AA	Cont	g/day	cg19825437		3	169383292	-6.04e-05	3.04e-11	NR	N_Shelf	NR
Liu 2018	9643	EA	Cont	g/day	cg06657944	TBL1XR1	3	176915062	-7.46e-05	1.81e-08	NR	N_Shore	NR
Liu 2018	2423	AA	Cont	g/day	cg19827923	GPR55	2	231790777	-3.5e-05	7.14e-08	NR		NR
Liu 2018	9643	EA	Cont	g/day	cg13729116	LETM1	4	1859262	-0.000178244	6.7e-18	NR	S_Shore	NR
Liu 2018	9643	EA	Cont	g/day	cg18101225	FGFBP2	4	15964913	0.000102643	8.45e-09	NR		NR
Liu 2018	9643	EA	Cont	g/day	cg04487857	SLC7A11	4	139096540	0.000109109	2.65e-09	NR		NR
Liu 2018	9643	EA	Cont	g/day	cg04006143	NDUFC1	4	140217312	-0.000239695	4.37e-08	NR	S_Shore	NR
Liu 2018	9643	EA	Cont	g/day	cg02282631		5	42953543	-0.000324862	3.07e-08	NR	S_Shore	NR
Liu 2018	9643	EA	Cont	g/day	cg08840551		5	56718349	-0.00017046	2.36e-08	NR		NR
Liu 2018	9643	EA	Cont	g/day	cg27020362	MGC29506	5	138723394	0.000194607	6.26e-08	NR		NR
Liu 2018	9643	EA	Cont	g/day	cg25518868	DIAPH1	5	140984057	-0.000123052	2.28e-12	NR		NR
Liu 2018	9643	EA	Cont	g/day	cg01201215	ATOX1	5	151137430	-0.000155998	6.76e-09	NR	N_Shore	NR
Liu 2018	9643	EA	Cont	g/day	cg15699524	FGF18	5	170845610	-0.000153203	4.13e-09	NR	N_Shore	NR
Liu 2018	9643	EA	Cont	g/day	cg03846076	STC2	5	172743837	0.000366331	8.58e-08	NR		NR
Liu 2018	9643	EA	Cont	g/day	cg19939077	PPIF	10	81108060	-0.000226411	2.24e-11	NR	S_Shore	NR
Liu 2018	9643	EA	Cont	g/day	cg01487468		6	14622793	-0.000145833	5.69e-08	NR		NR
Liu 2018	9643	EA	Cont	g/day	cg26405097	JARID2	6	15428301	-0.000156887	5.94e-08	NR		NR
Liu 2018	9643	EA	Cont	g/day	cg12662084	KIF13A	6	17809126	-0.000348783	1.4e-10	NR		NR
Liu 2018	9643	EA	Cont	g/day	cg27486585	HLA-E	6	30459595	-0.000183923	1.27e-08	NR	S_Shore	NR
Liu 2018	9643	EA	Cont	g/day	cg11484872	TNF	6	31543169	-0.000238677	4.91e-10	NR		NR
Liu 2018	9643	EA	Cont	g/day	cg03689048	BAT3	6	31619544	-0.000111641	5.36e-10	NR	N_Shore	NR
Liu 2018	9643	EA	Cont	g/day	cg11617964	PRRT1	6	32118399	-0.000305609	1.54e-08	NR	Island	NR
Liu 2018	9643	EA	Cont	g/day	cg22268510	PRRT1	6	32118420	-0.000285806	2.34e-08	NR	Island	NR
Liu 2018	9643	EA	Cont	g/day	cg11682350	VPS52	6	33240284	-5.63e-05	3.23e-09	NR	S_Shore	NR
Liu 2018	9643	EA	Cont	g/day	cg14051147		6	33539394	-0.000129371	8.95e-08	NR	S_Shore	NR
Liu 2018	9643	EA	Cont	g/day	cg05593667		6	35490744	-0.000252447	4.44e-16	NR		NR
Liu 2018	9643	EA	Cont	g/day	cg07507418	TRERF1	6	42372284	-0.000193753	7.15e-08	NR		NR
Liu 2018	9643	EA	Cont	g/day	cg08224159	AKAP12	6	151646312	-0.00021809	1.14e-09	NR	N_Shore	NR
Liu 2018	9643	EA	Cont	g/day	cg22871253	EZR	6	159238744	-0.000188219	1.27e-09	NR	N_Shore	NR
Liu 2018	9643	EA	Cont	g/day	cg21248060	C7orf50	7	1039957	0.000208003	2.29e-09	NR	Island	NR
Liu 2018	9643	EA	Cont	g/day	cg16492851	C7orf50	7	1062681	0.000120033	7.16e-08	NR	Island	NR
Liu 2018	9643	EA	Cont	g/day	cg19730982	C7orf50	7	1062729	9.62e-05	8e-08	NR	Island	NR
Liu 2018	9643	EA	Cont	g/day	cg07556911	MAD1L1	7	2044787	0.000123825	2.1e-08	NR	Island	NR
Liu 2018	9643	EA	Cont	g/day	cg07512517		7	38408106	-0.000171301	2.48e-08	NR		NR
Liu 2018	9643	EA	Cont	g/day	cg00817377	ELN	7	73441057	-0.000128232	8.36e-09	NR		NR
Liu 2018	9643	EA	Cont	g/day	cg06189038	GAL3ST4	7	99767134	-0.000160345	4.57e-13	NR	N_Shore	NR
Liu 2018	9643	EA	Cont	g/day	cg03021802	EPB49	8	21923841	-0.000183841	1.7e-08	NR	Island	NR
Liu 2018	9643	EA	Cont	g/day	cg09535960	LOXL2	8	23193704	0.000171727	8.85e-08	NR		NR
Liu 2018	9643	EA	Cont	g/day	cg20188739	SNORD87	8	67834756	-0.000212576	4.66e-08	NR	N_Shelf	NR
Liu 2018	9643	EA	Cont	g/day	cg20374917	FLI1	11	128603874	-0.000162622	3.2e-11	NR		NR
Liu 2018	9643	EA	Cont	g/day	cg08597832	TOP1MT	8	144416327	-0.00016218	6.12e-11	NR	N_Shore	NR
Liu 2018	9643	EA	Cont	g/day	cg12188860	TOP1MT	8	144416485	-0.000239327	6.17e-09	NR	N_Shore	NR
Liu 2018	9643	EA	Cont	g/day	cg23579062	C9orf25	9	34457500	-0.000141735	7.97e-08	NR	Island	NR
Liu 2018	9643	EA	Cont	g/day	cg14442518		9	136102543	0.000120076	8.41e-08	NR	S_Shore	NR
Liu 2018	9643	EA	Cont	g/day	cg06638811	RNU6ATAC	9	137030555	-0.000304661	1.32e-09	NR	Island	NR
Liu 2018	2423	AA	Cont	g/day	cg20385395	SNHG4	5	138613030	-6.34e-05	3.41e-10	NR	S_Shelf	NR
Liu 2018	9643	EA	Cont	g/day	cg23444264		10	72219751	-0.000193418	1.04e-08	NR	S_Shore	NR
Liu 2018	9643	EA	Cont	g/day	cg12752647	SPOCK2	10	73849106	-0.000129638	2.01e-08	NR	S_Shore	NR
Liu 2018	9643	EA	Cont	g/day	cg20484086		1	227015727	-0.000260199	1.52e-08	NR		NR
Liu 2018	2423	AA	Cont	g/day	cg20493718	CSNK1D	17	80202979	4.17e-05	1.39e-08	NR	Island	NR
Liu 2018	9643	EA	Cont	g/day	cg05457221		10	134272437	-0.000131515	2.69e-09	NR		NR
Liu 2018	9643	EA	Cont	g/day	cg06603309	KCNQ1	11	2724144	0.000166897	2.71e-14	NR	S_Shelf	NR
Liu 2018	9643	EA	Cont	g/day	cg00510149	MRVI1	11	10674966	-0.000156796	8.14e-09	NR		NR
Liu 2018	9643	EA	Cont	g/day	cg20204986	WT1	11	32448067	-0.000178141	7.5e-08	NR	N_Shore	NR
Liu 2018	9643	EA	Cont	g/day	cg00271311	CNTF	11	58389290	-0.000215594	1.64e-13	NR		NR
Liu 2018	9643	EA	Cont	g/day	cg21533897	NRXN2	11	64377229	0.000113815	2.72e-09	NR	S_Shore	NR
Liu 2018	9643	EA	Cont	g/day	cg20674424	MIR1248	3	186503527	-0.000210537	1.11e-08	NR	S_Shore	NR
Liu 2018	9643	EA	Cont	g/day	cg03575969	STARD10	11	72492171	-0.00016961	7.87e-08	NR	N_Shore	NR
Liu 2018	9643	EA	Cont	g/day	cg26039141	RPS3	11	75113160	-0.000127455	1.38e-08	NR	S_Shelf	NR
Liu 2018	9643	EA	Cont	g/day	cg05130679	AMOTL1	11	94502824	-0.000190281	8.57e-08	NR	S_Shore	NR
Liu 2018	9643	EA	Cont	g/day	cg10045354	C11orf93	11	111169427	-0.000219318	4.27e-08	NR	Island	NR
Liu 2018	9643	EA	Cont	g/day	cg16744438	DDX6	11	118657127	-0.000192991	7.26e-08	NR		NR
Liu 2018	9643	EA	Cont	g/day	cg09694921	DCPS	11	126215608	-0.000134242	5.63e-11	NR		NR
Liu 2018	9643	EA	Cont	g/day	cg18282388	TMEM45B	11	129716470	0.0002136	2.14e-09	NR		NR
Liu 2018	9643	EA	Cont	g/day	cg06516865	ETV6	12	11883921	-0.000151603	2.34e-09	NR		NR
Liu 2018	9643	EA	Cont	g/day	cg20732076	TRERF1	6	42335231	-0.000146791	1.46e-12	NR		NR
Liu 2018	9643	EA	Cont	g/day	cg21226442	C12orf11	12	27088580	-0.00023626	7.37e-08	NR	N_Shelf	NR
Liu 2018	9643	EA	Cont	g/day	cg27491190	SLC38A2	12	46767943	-0.000231754	4.4e-08	NR	S_Shore	NR
Liu 2018	9643	EA	Cont	g/day	cg16889557		12	50426531	-0.000190117	5.07e-09	NR	N_Shore	NR
Liu 2018	9643	EA	Cont	g/day	cg24750156	B4GALNT1	12	58025315	-0.00020192	8.04e-09	NR	N_Shore	NR
Liu 2018	9643	EA	Cont	g/day	cg06533408	SLC35E3	12	69139618	-0.000170064	1.17e-08	NR	N_Shore	NR
Liu 2018	9643	EA	Cont	g/day	cg24420742		12	77721808	-0.000197272	8.68e-09	NR	S_Shelf	NR
Liu 2018	9643	EA	Cont	g/day	cg04961225		12	91332479	0.00023287	3.51e-09	NR		NR
Liu 2018	9643	EA	Cont	g/day	cg18954900	ELK3	12	96604497	-0.000233979	1.44e-09	NR		NR
Liu 2018	9643	EA	Cont	g/day	cg02499214	RHOF	12	122230490	-6.44e-05	6.49e-08	NR	N_Shore	NR
Liu 2018	9643	EA	Cont	g/day	cg09042952	LOC338799	12	122237463	-4.57e-05	3.11e-09	NR	N_Shore	NR
Liu 2018	9643	EA	Cont	g/day	cg07447742	MLNR	13	49793170	-0.000216734	8.12e-08	NR	N_Shore	NR
Liu 2018	9643	EA	Cont	g/day	cg24146100	DOCK9	13	99737448	-0.000229638	8.25e-08	NR	N_Shore	NR
Liu 2018	2423	AA	Cont	g/day	cg20886049	TSKU	11	76493545	-6.05e-05	3.74e-08	NR	N_Shore	NR
Liu 2018	9643	EA	Cont	g/day	cg24570624	C14orf4	14	77493278	-0.000178699	5.97e-08	NR	Island	NR
Liu 2018	2423	AA	Cont	g/day	cg20889322		11	65196622	-5.16e-05	3.22e-08	NR		NR
Liu 2018	9643	EA	Cont	g/day	cg03345232	RIN3	14	92981121	-0.000209487	5.76e-10	NR	Island	NR
Liu 2018	9643	EA	Cont	g/day	cg20945261	NUP210	3	13460618	-0.000191839	2.08e-09	NR	N_Shore	NR
Liu 2018	9643	EA	Cont	g/day	cg20948740	DNMT3A	2	25475726	-0.000285328	1.34e-11	NR	Island	NR
Liu 2018	9643	EA	Cont	g/day	cg26430287	SMAD3	15	67439567	-0.000247362	1.71e-10	NR		NR
Liu 2018	9643	EA	Cont	g/day	cg23166988		16	2070861	-0.000276846	9.73e-09	NR	Island	NR
Liu 2018	9643	EA	Cont	g/day	cg01850135	NMRAL1	16	4516078	0.000191881	2.31e-08	NR		NR
Liu 2018	9643	EA	Cont	g/day	cg05152300	XYLT1	16	17458534	-0.000135229	2.34e-08	NR		NR
Liu 2018	9643	EA	Cont	g/day	cg20970369	DENND2D	1	111744108	-0.000227381	3.23e-12	NR	N_Shelf	NR
Liu 2018	9643	EA	Cont	g/day	cg08766770	XPO6	16	28123059	-0.000130424	2.02e-08	NR		NR
Liu 2018	9643	EA	Cont	g/day	cg05683445	SBK1	16	28303182	-0.000169456	3.95e-11	NR	N_Shore	NR
Liu 2018	9643	EA	Cont	g/day	cg08916477	SEPT1	16	30391350	-0.000162837	4.02e-13	NR	S_Shore	NR
Liu 2018	9643	EA	Cont	g/day	cg14676592		16	49910862	-0.0001352	1.48e-09	NR	Island	NR
Liu 2018	9643	EA	Cont	g/day	cg00657780		16	50285254	-0.000179482	2.03e-08	NR		NR
Liu 2018	9643	EA	Cont	g/day	cg07735969	SMPD3	16	68418473	-0.000109615	1.36e-08	NR		NR
Liu 2018	9643	EA	Cont	g/day	cg03603530	PDF	16	69365009	-0.000108706	1.92e-08	NR	S_Shore	NR
Liu 2018	9643	EA	Cont	g/day	cg03485667	ZNRF1	16	75143200	-0.000200024	1.51e-09	NR		NR
Liu 2018	9643	EA	Cont	g/day	cg26569315	SLC7A5	16	87886902	-6.46e-05	4.05e-10	NR		NR
Liu 2018	9643	EA	Cont	g/day	cg09907628	ANKRD11	16	89498634	-0.000134987	1.03e-09	NR	N_Shore	NR
Liu 2018	9643	EA	Cont	g/day	cg07451297	MPDU1	17	7486874	-0.00015954	1.33e-08	NR	Island	NR
Liu 2018	9643	EA	Cont	g/day	cg12699156	SHBG	17	7517016	-0.000135542	4.88e-08	NR	N_Shore	NR
Liu 2018	9643	EA	Cont	g/day	cg05465916	LOC284023	17	7819762	-0.00019089	2.17e-09	NR	Island	NR
Liu 2018	9643	EA	Cont	g/day	cg17757575	RASL10B	17	34068891	-0.000205722	1.07e-08	NR	S_Shore	NR
Liu 2018	9643	EA	Cont	g/day	cg27492942	CISD3	17	36885965	-0.000189492	1.17e-08	NR	N_Shore	NR
Liu 2018	9643	EA	Cont	g/day	cg21130958	CRISPLD1	8	75898238	-0.000182331	1.38e-08	NR	S_Shore	NR
Liu 2018	9643	EA	Cont	g/day	cg06474661		17	48239271	-0.000128622	6.38e-08	NR	S_Shore	NR
Liu 2018	9643	EA	Cont	g/day	cg08677210	MSI2	17	55550613	-0.000134156	3.32e-12	NR		NR
Liu 2018	9643	EA	Cont	g/day	cg19030682	SLC38A10	17	79218991	0.000178458	9.22e-08	NR		NR
Liu 2018	9643	EA	Cont	g/day	cg15253293		17	79366853	-0.000140199	1.11e-15	NR	Island	NR
Liu 2018	9643	EA	Cont	g/day	cg08429256	SLC16A3	17	80188425	-0.000155808	4.03e-09	NR	Island	NR
Liu 2018	9643	EA	Cont	g/day	cg22332722	CDH2	18	25754857	-0.000361164	2.22e-08	NR	N_Shore	NR
Liu 2018	9643	EA	Cont	g/day	cg24848615	NFIC	19	3368396	-0.000183639	5.77e-09	NR	N_Shore	NR
Liu 2018	9643	EA	Cont	g/day	cg15055101	SH2D3A	19	6766609	-0.000162025	1e-08	NR	N_Shore	NR
Liu 2018	9643	EA	Cont	g/day	cg21201109	KANK2	19	11307090	-0.000163329	7.18e-08	NR	N_Shore	NR
Liu 2018	9643	EA	Cont	g/day	cg25612391	SLC25A42	19	19216451	-0.000257381	3.39e-09	NR		NR
Liu 2018	9643	EA	Cont	g/day	cg04661001	SLC25A42	19	19217217	-0.000298416	5.36e-08	NR	N_Shelf	NR
Liu 2018	2423	AA	Cont	g/day	cg21337881	C17orf87	17	5138645	5.4e-05	1.05e-09	NR		NR
Liu 2018	9643	EA	Cont	g/day	cg21369801	CSNK1D	17	80202961	0.000197715	2.48e-09	NR	Island	NR
Liu 2018	9643	EA	Cont	g/day	cg03359362	SLC1A5	19	47289611	-6.21e-05	1.87e-10	NR	N_Shore	NR
Liu 2018	9643	EA	Cont	g/day	cg07805604	CCDC106	19	56158885	-0.000144105	2.72e-08	NR	N_Shore	NR
Liu 2018	9643	EA	Cont	g/day	cg00432454	C20orf54	20	741937	-0.000117396	9.35e-09	NR	Island	NR
Liu 2018	9643	EA	Cont	g/day	cg23534245	BMP2	20	6751435	-0.000186225	7.31e-10	NR	S_Shore	NR
Liu 2018	9643	EA	Cont	g/day	cg21429551	GARS	7	30635762	-0.000845343	1.43e-11	NR	S_Shore	NR
Liu 2018	9643	EA	Cont	g/day	cg19803952	DBNDD2	20	44036136	-0.000159896	6.65e-09	NR	S_Shore	NR
Liu 2018	9643	EA	Cont	g/day	cg21439672	C1RL	12	7260546	-0.000297026	3.7e-12	NR		NR
Liu 2018	9643	EA	Cont	g/day	cg09029902	ZNF217	20	52199594	-9.48e-05	5.31e-08	NR	S_Shore	NR
Liu 2018	9643	EA	Cont	g/day	cg21578195	PTK6	20	62168727	-0.000118018	8.69e-09	NR	S_Shore	NR
Liu 2018	9643	EA	Cont	g/day	cg14391586	SOX18	20	62681296	-0.000187694	8.81e-08	NR	Island	NR
Liu 2018	9643	EA	Cont	g/day	cg00549412	SLC37A1	21	43933482	-0.000191036	2e-08	NR	N_Shore	NR
Liu 2018	9643	EA	Cont	g/day	cg09365259	TUBA8	22	18594196	-0.000182845	2.14e-08	NR	Island	NR
Liu 2018	9643	EA	Cont	g/day	cg03382805		22	23905582	0.000120359	3.93e-08	NR	N_Shelf	NR
Liu 2018	9643	EA	Cont	g/day	cg09856467	TPST2	22	26938937	0.000176869	9.73e-09	NR	S_Shore	NR
Liu 2018	2423	AA	Cont	g/day	cg21566642		2	233284661	-0.000119175	9.09e-10	NR	Island	NR
Liu 2018	2423	AA	Cont	g/day	cg03607951	IFI44L	1	79085586	-0.00012445	8.55e-09	NR		NR
Liu 2018	2423	AA	Cont	g/day	cg18085280		1	92004374	-3.76e-05	2.03e-09	NR	S_Shelf	NR
Liu 2018	2423	AA	Cont	g/day	cg18146737	GFI1	1	92946700	-7.83e-05	1.53e-09	NR	Island	NR
Liu 2018	2423	AA	Cont	g/day	cg12876356	GFI1	1	92946825	-0.000112971	5.86e-13	NR	Island	NR
Liu 2018	2423	AA	Cont	g/day	cg18316974	GFI1	1	92947035	-5.52e-05	1.9e-09	NR	Island	NR
Liu 2018	2423	AA	Cont	g/day	cg09935388	GFI1	1	92947588	-0.000166773	2.07e-17	NR	Island	NR
Liu 2018	2423	AA	Cont	g/day	cg21115691	FCAMR	1	207140927	8.78e-06	7.74e-08	NR		NR
Liu 2018	2423	AA	Cont	g/day	cg05053365		1	244175136	-5.22e-05	5.53e-10	NR		NR
Liu 2018	2423	AA	Cont	g/day	cg22082665	NCRNA00201	1	245011429	-5.69e-05	5.83e-11	NR		NR
Liu 2018	2423	AA	Cont	g/day	cg00123017		2	3696748	-2.25e-05	4.44e-09	NR	N_Shore	NR
Liu 2018	9643	EA	Cont	g/day	cg21626848	SC65	17	39969267	-0.000226796	3.11e-15	NR	S_Shore	NR
Liu 2018	9643	EA	Cont	g/day	cg21791017	LTK	15	41803772	-0.000191272	8.69e-08	NR	Island	NR
Liu 2018	2423	AA	Cont	g/day	cg27493243		2	233366070	-2.65e-05	1.91e-10	NR	N_Shore	NR
Liu 2018	2423	AA	Cont	g/day	cg26078407	HDAC4	2	240225062	4.2e-05	3.16e-08	NR		NR
Liu 2018	2423	AA	Cont	g/day	cg13958389	VGLL4	3	11643630	6.05e-05	9.89e-08	NR		NR
Liu 2018	2423	AA	Cont	g/day	cg11882607	CAND2	3	12858926	6.04e-05	8.14e-08	NR	S_Shelf	NR
Liu 2018	9643	EA	Cont	g/day	cg21846790	FAM100A	16	4666047	-0.00013504	2.78e-08	NR	Island	NR
Liu 2018	2423	AA	Cont	g/day	cg07449209		3	117267936	-5.65e-05	1.16e-08	NR		NR
Liu 2018	2423	AA	Cont	g/day	cg11610002		3	126080368	-9.59e-05	1.37e-28	NR	S_Shelf	NR
Liu 2018	2423	AA	Cont	g/day	cg25729907	PLSCR1	3	146263345	-4.92e-05	3.7e-24	NR	S_Shore	NR
Liu 2018	2423	AA	Cont	g/day	cg15061231		3	186353575	-9.44e-05	9.14e-28	NR		NR
Liu 2018	2423	AA	Cont	g/day	cg25120484		3	197186156	-4.71e-05	2.03e-22	NR	S_Shelf	NR
Liu 2018	2423	AA	Cont	g/day	cg20523947	SCFD2	4	53744073	-3.25e-05	3.52e-09	NR		NR
Liu 2018	2423	AA	Cont	g/day	cg25648203	AHRR	5	395444	-4.69e-05	5.27e-08	NR		NR
Liu 2018	2423	AA	Cont	g/day	cg04646205	RGMB	5	98109366	9.28e-06	4.38e-08	NR	Island	NR
Liu 2018	2423	AA	Cont	g/day	cg22090064		5	150767392	-4.24e-05	1.77e-12	NR		NR
Liu 2018	2423	AA	Cont	g/day	cg21075643	BTNL2	6	32365785	-2.65e-05	2.53e-08	NR		NR
Liu 2018	2423	AA	Cont	g/day	cg05538701	FAM26D	6	116866658	-4.17e-05	9.53e-20	NR		NR
Liu 2018	2423	AA	Cont	g/day	cg08549335	ZNRF2	7	30387954	-9.26e-05	8.6e-08	NR		NR
Liu 2018	2423	AA	Cont	g/day	cg17546215		7	70577170	-4.23e-05	2.44e-09	NR		NR
Liu 2018	2423	AA	Cont	g/day	cg07470207		8	132828746	3.51e-05	1.24e-17	NR		NR
Liu 2018	9643	EA	Cont	g/day	cg22052056	DNMT3B	20	31351813	-0.000179502	3.37e-08	NR	S_Shore	NR
Liu 2018	2423	AA	Cont	g/day	cg22524735	BREA2	8	144779094	-2.9e-05	1.39e-24	NR	S_Shelf	NR
Liu 2018	2423	AA	Cont	g/day	cg20555778	MIR2278	9	97572199	-2.4e-05	5.9e-08	NR		NR
Liu 2018	2423	AA	Cont	g/day	cg14243616		9	100688028	-4.04e-05	1.66e-10	NR	S_Shelf	NR
Liu 2018	2423	AA	Cont	g/day	cg00008629	ROD1	9	115093661	-0.000118768	2.56e-08	NR	N_Shore	NR
Liu 2018	2423	AA	Cont	g/day	cg13706315		9	134724316	4.54e-05	7.85e-09	NR		NR
Liu 2018	2423	AA	Cont	g/day	cg05010113		10	2006950	-3.9e-05	9.18e-13	NR		NR
Liu 2018	2423	AA	Cont	g/day	cg25529535		10	6125715	-4.77e-05	6.57e-08	NR		NR
Liu 2018	2423	AA	Cont	g/day	cg10870587		10	95249627	-4.12e-05	9.46e-09	NR		NR
Liu 2018	2423	AA	Cont	g/day	cg10552523	IFITM1	11	313478	-7.67e-05	3.35e-09	NR	N_Shelf	NR
Liu 2018	2423	AA	Cont	g/day	cg01971407	IFITM1	11	313624	-8.69e-05	1.71e-12	NR	N_Shelf	NR
Liu 2018	2423	AA	Cont	g/day	cg09167291	BRSK2	11	1468535	-5.8e-05	1.11e-11	NR	N_Shore	NR
Liu 2018	2423	AA	Cont	g/day	cg09467675	HCCA2	11	1681593	-6.74e-05	5.11e-12	NR		NR
Liu 2018	2423	AA	Cont	g/day	cg26553513	LRRC4C	11	40310738	-7.21e-05	4.43e-08	NR		NR
Liu 2018	1251	W: 47; AA: 21; Hisp: 32	Cont	g/day	cg22304262	SLC1A5	19	47287778	-0.000375	8.57e-09	NR	N_Shelf	NR
Liu 2018	2423	AA	Cont	g/day	cg03528246	P4HA3	11	73995105	-2.3e-05	2.77e-08	NR		NR
Liu 2018	2423	AA	Cont	g/day	cg20759281	LDHB	12	21796914	-6.3e-05	7.31e-08	NR		NR
Liu 2018	2423	AA	Cont	g/day	cg05248321	KLHL33	14	20898128	5.78e-05	4.73e-08	NR		NR
Liu 2018	2423	AA	Cont	g/day	cg23123972	ABHD4	14	23080613	-3e-05	2.21e-09	NR		NR
Liu 2018	9643	EA	Cont	g/day	cg22451412	EHD4	15	42227210	0.000110606	9.73e-08	NR		NR
Liu 2018	2423	AA	Cont	g/day	cg13057576	SYNE2	14	64692154	-3.5e-05	9.32e-18	NR		NR
Liu 2018	2423	AA	Cont	g/day	cg01578221	ACYP1	14	75530906	2.42e-06	1.05e-09	NR		NR
Liu 2018	2423	AA	Cont	g/day	cg18392604	DLK1	14	101192386	-3.38e-05	1.62e-14	NR	N_Shore	NR
Liu 2018	2423	AA	Cont	g/day	cg02074956	MGRN1	16	4730657	4.67e-05	5.43e-08	NR	N_Shore	NR
Liu 2018	2423	AA	Cont	g/day	cg01200905	TOX3	16	52480264	-5.57e-05	7.21e-08	NR		NR
Liu 2018	2423	AA	Cont	g/day	cg12537003	RAP1GAP2	17	2886453	4.3e-05	3.52e-10	NR		NR
Liu 2018	2423	AA	Cont	g/day	cg02795151	POLR2A	17	7402630	-1.75e-05	2.71e-08	NR		NR
Liu 2018	2423	AA	Cont	g/day	cg27551295	OSBPL7	17	45894580	-1.86e-05	1.29e-11	NR	S_Shelf	NR
Liu 2018	2423	AA	Cont	g/day	cg12054453	TMEM49	17	57915717	-9.67e-05	4.71e-08	NR		NR
Liu 2018	2423	AA	Cont	g/day	cg13620705	LLGL2	17	73559492	-8.94e-05	8.88e-16	NR	Island	NR
Liu 2018	9643	EA	Cont	g/day	cg22797644	HMGA1	6	34206491	-0.000223141	2.57e-11	NR	S_Shore	NR
Liu 2018	2423	AA	Cont	g/day	cg22515589	BAHCC1	17	79426432	4.43e-05	3.01e-08	NR	N_Shore	NR
Liu 2018	2423	AA	Cont	g/day	cg12287206		17	80247929	-7.78e-05	1.48e-12	NR	N_Shelf	NR
Liu 2018	2423	AA	Cont	g/day	cg06306636	SPIRE1	18	12455633	-3.97e-05	9.1e-13	NR		NR
Liu 2018	2423	AA	Cont	g/day	cg11900210	BRUNOL4	18	34915648	-6.86e-05	1.6e-08	NR	N_Shore	NR
Liu 2018	2423	AA	Cont	g/day	cg07710247	NARS	18	55268669	-4.14e-05	1.06e-20	NR		NR
Liu 2018	2423	AA	Cont	g/day	cg22805381		14	51760188	-6.61e-05	6.44e-08	NR		NR
Liu 2018	2423	AA	Cont	g/day	cg24000650	ZFR2	19	3811161	6.24e-05	7.91e-08	NR	Island	NR
Liu 2018	2423	AA	Cont	g/day	cg10854610	ZNF761	19	53935034	5.88e-05	3.29e-14	NR	N_Shore	NR
Liu 2018	2423	AA	Cont	g/day	cg00240880	WISP2	20	43343233	-3.69e-05	1.68e-11	NR		NR
Liu 2018	9643	EA	Cont	g/day	cg22876908	DGKA	12	56325149	-0.000152717	2.15e-10	NR	N_Shore	NR
Liu 2018	2423	AA	Cont	g/day	cg27653384	PPM1F	22	22293118	6.56e-05	3.13e-08	NR	S_Shore	NR
Liu 2018	1251	W: 47; AA: 21; Hisp: 32	Cont	g/day	cg25190722	DFFB	1	3801660	-0.000181	1.19e-10	NR		NR
Liu 2018	1251	W: 47; AA: 21; Hisp: 32	Cont	g/day	cg12133952	SLC6A9	1	44497352	-0.000227	1.17e-08	NR	S_Shore	NR
Liu 2018	1251	W: 47; AA: 21; Hisp: 32	Cont	g/day	cg25386133	FAM189B	1	155217830	-0.000239	6.34e-12	NR	N_Shelf	NR
Liu 2018	1251	W: 47; AA: 21; Hisp: 32	Cont	g/day	cg00767642	NMNAT2	1	183387422	0.000151	7.07e-09	NR	Island	NR
Liu 2018	1251	W: 47; AA: 21; Hisp: 32	Cont	g/day	cg16365424		1	234700636	-0.00016	2.94e-08	NR		NR
Liu 2018	1251	W: 47; AA: 21; Hisp: 32	Cont	g/day	cg14478895		2	10692118	-0.00011	4.66e-11	NR		NR
Liu 2018	1251	W: 47; AA: 21; Hisp: 32	Cont	g/day	cg24527751	TLK1	2	171877888	-0.000185	1.58e-09	NR		NR
Liu 2018	1251	W: 47; AA: 21; Hisp: 32	Cont	g/day	cg20140201	C2orf54	2	241835670	-0.000229	1.7e-10	NR		NR
Liu 2018	1251	W: 47; AA: 21; Hisp: 32	Cont	g/day	cg17619311	ZNF662	3	42947565	0.000273	3.9e-08	NR	Island	NR
Liu 2018	1251	W: 47; AA: 21; Hisp: 32	Cont	g/day	cg24384244	ZNF662	3	42947690	0.00025	1.14e-19	NR	Island	NR
Liu 2018	1251	W: 47; AA: 21; Hisp: 32	Cont	g/day	cg01357292	ZNF662	3	42947771	0.000163	1.4e-11	NR	Island	NR
Liu 2018	1251	W: 47; AA: 21; Hisp: 32	Cont	g/day	cg20832020	TIGIT	3	114012912	-0.00021	2.96e-09	NR		NR
Liu 2018	1251	W: 47; AA: 21; Hisp: 32	Cont	g/day	cg11034122	SLC12A8	3	124879970	-0.000218	7.67e-11	NR		NR
Liu 2018	1251	W: 47; AA: 21; Hisp: 32	Cont	g/day	cg22754176	RHOBTB3	5	95066806	0.000161	2.44e-09	NR	N_Shore	NR
Liu 2018	1251	W: 47; AA: 21; Hisp: 32	Cont	g/day	cg05838308	TGFBI	5	135367668	-0.000258	2.74e-15	NR	S_Shelf	NR
Liu 2018	1251	W: 47; AA: 21; Hisp: 32	Cont	g/day	cg19017803	LOC285627	5	158893488	-0.000226	5.07e-16	NR		NR
Liu 2018	1251	W: 47; AA: 21; Hisp: 32	Cont	g/day	cg07496207	ERGIC1	5	172280684	-0.000328	8.69e-08	NR		NR
Liu 2018	1251	W: 47; AA: 21; Hisp: 32	Cont	g/day	cg24928581	PPT2	6	32122175	0.000147	4.15e-09	NR	Island	NR
Liu 2018	1251	W: 47; AA: 21; Hisp: 32	Cont	g/day	cg17990771		6	32223226	0.000147	9.59e-09	NR		NR
Liu 2018	1251	W: 47; AA: 21; Hisp: 32	Cont	g/day	cg18133076	GPR111	6	47623751	-0.000224	7.61e-14	NR		NR
Liu 2018	1251	W: 47; AA: 21; Hisp: 32	Cont	g/day	cg21379546	KIAA1908	7	1624987	-0.000236	3.69e-08	NR		NR
Liu 2018	1251	W: 47; AA: 21; Hisp: 32	Cont	g/day	cg13804356		7	36345224	-0.000163	4.92e-10	NR		NR
Liu 2018	1251	W: 47; AA: 21; Hisp: 32	Cont	g/day	cg10649802		8	57805770	-0.00014	5.6e-08	NR		NR
Liu 2018	1251	W: 47; AA: 21; Hisp: 32	Cont	g/day	cg16663900		10	22540745	0.000155	1.42e-17	NR	Island	NR
Liu 2018	1251	W: 47; AA: 21; Hisp: 32	Cont	g/day	cg11229185		10	22625274	0.000348	1.28e-09	NR	Island	NR
Liu 2018	1251	W: 47; AA: 21; Hisp: 32	Cont	g/day	cg02097843		10	33269812	9.6e-05	9.68e-08	NR	Island	NR
Liu 2018	1251	W: 47; AA: 21; Hisp: 32	Cont	g/day	cg17295910	EBF3	10	131731569	-0.000253	3.33e-09	NR		NR
Liu 2018	1251	W: 47; AA: 21; Hisp: 32	Cont	g/day	cg11724562	NADSYN1	11	71196642	-0.000173	1.46e-09	NR		NR
Liu 2018	1251	W: 47; AA: 21; Hisp: 32	Cont	g/day	cg17464820	SIK3	11	116838417	-0.000438	2.93e-09	NR		NR
Liu 2018	1251	W: 47; AA: 21; Hisp: 32	Cont	g/day	cg14351692	GRIN2B	12	13716374	-0.000239	2.91e-09	NR	Island	NR
Liu 2018	1251	W: 47; AA: 21; Hisp: 32	Cont	g/day	cg21638454		12	27345419	-0.000266	5.44e-08	NR		NR
Liu 2018	1251	W: 47; AA: 21; Hisp: 32	Cont	g/day	cg03432814		12	117037220	-0.000454	9.24e-10	NR		NR
Liu 2018	1251	W: 47; AA: 21; Hisp: 32	Cont	g/day	cg20531035		12	133028375	-0.000242	1.53e-11	NR		NR
Liu 2018	1251	W: 47; AA: 21; Hisp: 32	Cont	g/day	cg04561389	FGF14	13	103052468	0.000461	8.93e-23	NR	Island	NR
Liu 2018	1251	W: 47; AA: 21; Hisp: 32	Cont	g/day	cg18771357	EFNB2	13	107186870	0.000124	1.61e-10	NR	Island	NR
Liu 2018	1251	W: 47; AA: 21; Hisp: 32	Cont	g/day	cg00738309	RASA3	13	114748624	-0.000305	8.1e-13	NR	Island	NR
Liu 2018	1251	W: 47; AA: 21; Hisp: 32	Cont	g/day	cg04855004	C14orf115	14	74822139	-0.000223	1.13e-11	NR	N_Shore	NR
Liu 2018	1251	W: 47; AA: 21; Hisp: 32	Cont	g/day	cg27150010	TMED10	14	75643321	0.000414	1.3e-24	NR	Island	NR
Liu 2018	1251	W: 47; AA: 21; Hisp: 32	Cont	g/day	cg26724572	PAR-SN	15	25226703	-0.00019	5.07e-09	NR		NR
Liu 2018	1251	W: 47; AA: 21; Hisp: 32	Cont	g/day	cg02712036	RAB27A	15	55569533	0.000256	5.22e-16	NR		NR
Liu 2018	1251	W: 47; AA: 21; Hisp: 32	Cont	g/day	cg15268200	ZNF774	15	90904599	-0.000196	9.35e-09	NR		NR
Liu 2018	1251	W: 47; AA: 21; Hisp: 32	Cont	g/day	cg02062418	CCDC154	16	1494677	-0.000201	4.06e-08	NR	N_Shore	NR
Liu 2018	1251	W: 47; AA: 21; Hisp: 32	Cont	g/day	cg04245634	ZSCAN10	16	3140535	-0.000209	3.83e-09	NR	Island	NR
Liu 2018	1251	W: 47; AA: 21; Hisp: 32	Cont	g/day	cg07537551	VWA3A	16	22115461	-0.000142	4.14e-08	NR		NR
Liu 2018	1251	W: 47; AA: 21; Hisp: 32	Cont	g/day	cg21622464	DYNLL2	17	56164461	-0.00028	1.25e-19	NR	S_Shelf	NR
Liu 2018	1251	W: 47; AA: 21; Hisp: 32	Cont	g/day	cg07737179	C19orf70	19	5678497	-0.000201	3.89e-14	NR	N_Shore	NR
Liu 2018	1251	W: 47; AA: 21; Hisp: 32	Cont	g/day	cg12953628	CD320	19	8372962	0.000214	1.16e-15	NR	Island	NR
Liu 2018	1251	W: 47; AA: 21; Hisp: 32	Cont	g/day	cg13506058	AP2A1	19	50270010	0.00045	1.4e-26	NR	Island	NR
Liu 2018	1251	W: 47; AA: 21; Hisp: 32	Cont	g/day	cg08873940	CTU1	19	51607432	-0.000156	6.39e-18	NR	Island	NR
Liu 2018	1251	W: 47; AA: 21; Hisp: 32	Cont	g/day	cg12096988	ZNF264	19	57702809	0.000192	6.75e-13	NR	Island	NR
Liu 2018	1251	W: 47; AA: 21; Hisp: 32	Cont	g/day	cg04800749	CRELD2	22	50320996	-0.000236	3.12e-08	NR	N_Shore	NR
Liu 2018	2423	AA	Cont	g/day	cg23090529		1	51442133	-9.34e-05	1.56e-08	NR	N_Shore	NR
Liu 2018	2423	AA	Cont	g/day	cg23205886	SNHG4	5	138611766	-5.81e-05	4.02e-08	NR	S_Shore	NR
Liu 2018	9643	EA	Cont	g/day	cg23299618		11	45102239	-0.000146487	5.88e-12	NR		NR
Liu 2018	2423	AA	Cont	g/day	cg23482898	CAND2	3	12858887	5.5e-05	2.12e-08	NR	S_Shelf	NR
Liu 2018	9643	EA	Cont	g/day	cg23629150	TOP1MT	8	144416404	-0.000240933	1.67e-08	NR	N_Shore	NR
Liu 2018	9643	EA	Cont	g/day	cg23654112	TBC1D24	16	2525928	-0.000137164	3e-13	NR	Island	NR
Liu 2018	1251	W: 47; AA: 21; Hisp: 32	Cont	g/day	cg23684449	GPT2	16	46919194	-0.000387	3.36e-08	NR	S_Shore	NR
Liu 2018	9643	EA	Cont	g/day	cg23712594	PARP1	1	226591890	-0.000196963	2.18e-09	NR	N_Shelf	NR
Liu 2018	2423	AA	Cont	g/day	cg23842572	MPRIP	17	17030253	4.91e-05	2.55e-09	NR		NR
Liu 2018	9643	EA	Cont	g/day	cg23893460	PKM2	15	72492422	0.000104928	2.28e-08	NR	S_Shelf	NR
Liu 2018	9643	EA	Cont	g/day	cg23913963	RCC2	1	17766917	-0.000267259	3.59e-09	NR	S_Shore	NR
Liu 2018	9643	EA	Cont	g/day	cg23975840		12	117042895	0.000267792	2e-10	NR		NR
Liu 2018	2423	AA	Cont	g/day	cg23975840		12	117042895	8.72e-05	9.39e-10	NR		NR
Liu 2018	2423	AA	Cont	g/day	cg24088496	MAML2	11	96071506	-8.08e-05	3.97e-11	NR		NR
Liu 2018	2423	AA	Cont	g/day	cg24129923	CHD3	17	7814251	4.56e-05	6.52e-08	NR		NR
Liu 2018	9643	EA	Cont	g/day	cg24135793	NFIX	19	13122567	-0.000293472	1.74e-08	NR	Island	NR
Liu 2018	9643	EA	Cont	g/day	cg24217948	SETBP1	18	42261980	-0.000276498	2.14e-12	NR	S_Shore	NR
Liu 2018	2423	AA	Cont	g/day	cg24497361	RHOG	11	3858493	-5.75e-05	5.07e-08	NR	N_Shelf	NR
Liu 2018	9643	EA	Cont	g/day	cg24711224	NSD1	5	176561865	-0.000164883	5.44e-08	NR	S_Shore	NR
Liu 2018	9643	EA	Cont	g/day	cg24754633	CCDC88C	14	91831327	-0.00013168	1.12e-09	NR		NR
Liu 2018	2423	AA	Cont	g/day	cg24859433		6	30720203	-4.98e-05	1.86e-09	NR		NR
Liu 2018	9643	EA	Cont	g/day	cg25197194	CCDC48	3	128758787	0.000299216	3.38e-08	NR		NR
Liu 2018	2423	AA	Cont	g/day	cg25221975	FBLN2	3	13663444	8.57e-05	7.34e-11	NR		NR
Liu 2018	9643	EA	Cont	g/day	cg25342059	MBNL1	3	152121157	-0.000210897	5.75e-09	NR		NR
Liu 2018	2423	AA	Cont	g/day	cg25595834		15	59156878	5.15e-05	1.08e-09	NR	N_Shore	NR
Liu 2018	9643	EA	Cont	g/day	cg25643223	SPATA13	13	24787195	-0.000190149	8.64e-09	NR		NR
Liu 2018	2423	AA	Cont	g/day	cg25998745		8	142028625	-7.73e-05	3.98e-11	NR		NR
Liu 2018	9643	EA	Cont	g/day	cg26091247		11	118784336	8.12e-05	1.49e-08	NR	S_Shelf	NR
Liu 2018	9643	EA	Cont	g/day	cg26103104		5	139490895	-0.000343059	1.92e-09	NR	N_Shore	NR
Liu 2018	2423	AA	Cont	g/day	cg26312951	MX1	21	42797847	-0.000118343	4.26e-11	NR	N_Shore	NR
Liu 2018	9643	EA	Cont	g/day	cg26312998	ZNF318	6	43337775	-0.000170625	1.09e-08	NR	Island	NR
Liu 2018	9643	EA	Cont	g/day	cg26829071	GPR133	12	131590596	0.000227163	1.62e-10	NR		NR
Liu 2018	2423	AA	Cont	g/day	cg27118035	ZNF267	16	31891978	5.91e-05	5.85e-11	NR		NR
Liu 2018	9643	EA	Cont	g/day	cg27180443	SCARB1	12	125348871	-0.000226013	2.2e-08	NR	S_Shore	NR
Liu 2018	2423	AA	Cont	g/day	cg27241845		2	233250370	-7.76e-05	4.28e-11	NR	N_Shore	NR
Liu 2018	9643	EA	Cont	g/day	cg27394566	PLD4	14	105391635	-0.000175447	3.47e-10	NR		NR
Liu 2018	9643	EA	Cont	g/day	cg27464065	APOLD1	12	12940610	-0.000290383	1.95e-11	NR	S_Shore	NR
Liu 2018	9643	EA	Cont	g/day	cg27479634	ATP5G2	12	54070545	-0.000216929	3.45e-09	NR	N_Shore	NR
Liu 2018	9643	EA	Cont	g/day	cg27514333	SMAD6	15	66996626	-0.000156941	2.77e-12	NR	S_Shore	NR
Dugue 2019	5606	NR	Cont	g/day in last decade	cg00061031	ANP32B	9	100744026	-0.00186259	1.01e-09	NR	NR	NR
Dugue 2019	5606	NR	Cont	g/day in last decade	cg00062245	ITGA2B	17	42462260	-0.00109807	3.25e-08	NR	NR	NR
Dugue 2019	5606	NR	Cont	g/day in last decade	cg00085438	MBNL1	3	152049980	-0.00142282	6.56e-12	NR	NR	NR
Dugue 2019	5606	NR	Cont	g/day in last decade	cg00139681		7	106125168	-0.00119549	3.64e-10	NR	NR	NR
Dugue 2019	5606	NR	Cont	g/day in last decade	cg00161791		21	45575014	-0.00108706	1.46e-08	NR	NR	NR
Dugue 2019	5606	NR	Cont	g/day in last decade	cg00166216	FAM43A	3	194407860	-0.00239824	1.86e-09	NR	NR	NR
Dugue 2019	5606	NR	Cont	g/day in last decade	cg00252472		6	150739173	-0.00266429	1.38e-15	NR	NR	NR
Dugue 2019	5606	NR	Cont	g/day in last decade	cg00303541	GRM2	3	51741280	-0.00218857	3.48e-09	NR	NR	NR
Dugue 2019	5606	NR	Cont	g/day in last decade	cg00308631	ProSAPiP1	20	3149249	-0.000929678	1.53e-08	NR	NR	NR
Dugue 2019	5606	NR	Cont	g/day in last decade	cg00328227	C1orf59	1	109204325	-0.00134736	1.5e-08	NR	NR	NR
Dugue 2019	5606	NR	Cont	g/day in last decade	cg00347863	SGCE	7	94220697	-0.00161353	5.3e-08	NR	NR	NR
Dugue 2019	5606	NR	Cont	g/day in last decade	cg00422488	ANP32B	9	100747767	-0.00225776	2.68e-13	NR	NR	NR
Dugue 2019	5606	NR	Cont	g/day in last decade	cg00505318	UBA3	3	69130918	-0.000982813	1.53e-09	NR	NR	NR
Dugue 2019	5606	NR	Cont	g/day in last decade	cg00574412	ABHD15	17	27892866	-0.00112864	1.47e-11	NR	NR	NR
Dugue 2019	5606	NR	Cont	g/day in last decade	cg00574958	CPT1A	11	68607622	-0.00240655	5.42e-12	NR	NR	NR
Dugue 2019	5606	NR	Cont	g/day in last decade	cg00639656	SNORD42A	17	27050360	-0.000774526	1.54e-08	NR	NR	NR
Dugue 2019	5606	NR	Cont	g/day in last decade	cg00664406	GRM2	3	51740875	-0.00151515	1.66e-09	NR	NR	NR
Dugue 2019	5606	NR	Cont	g/day in last decade	cg00889709	FAM110B	8	59043471	-0.00165986	2.47e-09	NR	NR	NR
Dugue 2019	5606	NR	Cont	g/day in last decade	cg00944421	ESRP2	16	68269483	-0.00428737	5.28e-12	NR	NR	NR
Dugue 2019	5606	NR	Cont	g/day in last decade	cg00947319	UBE2Z	17	47005597	-0.000851506	1.34e-08	NR	NR	NR
Dugue 2019	5606	NR	Cont	g/day in last decade	cg01055562	COG2	1	230777685	-0.00108788	5.1e-08	NR	NR	NR
Dugue 2019	5606	NR	Cont	g/day in last decade	cg01211283	PEBP4	8	22735276	-0.0022518	2.53e-09	NR	NR	NR
Dugue 2019	5606	NR	Cont	g/day in last decade	cg01567051	CMIP	16	81512025	-0.00102687	6.69e-09	NR	NR	NR
Dugue 2019	5606	NR	Cont	g/day in last decade	cg01594949	NRARP	9	140197890	-0.0012194	1.87e-08	NR	NR	NR
Dugue 2019	5606	NR	Cont	g/day in last decade	cg01735398	SLC5A10	17	18907305	-0.00152808	4.57e-08	NR	NR	NR
Dugue 2019	5606	NR	Cont	g/day in last decade	cg01741041	ACTB	7	5567862	-0.000912851	6.58e-08	NR	NR	NR
Dugue 2019	5606	NR	Cont	g/day in last decade	cg01810926	CPT2	1	53663981	-0.000844995	1.01e-08	NR	NR	NR
Dugue 2019	5606	NR	Cont	g/day in last decade	cg01901101		1	9486939	-0.000955142	7.41e-09	NR	NR	NR
Dugue 2019	5606	NR	Cont	g/day in last decade	cg02004370	PDF	16	69362629	-0.00138771	1.3e-09	NR	NR	NR
Dugue 2019	5606	NR	Cont	g/day in last decade	cg02187259	FAM49A	2	16804452	-0.00169555	2.52e-09	NR	NR	NR
Dugue 2019	5606	NR	Cont	g/day in last decade	cg02341119	MGAT5B	17	74866479	-0.000942258	1.73e-08	NR	NR	NR
Dugue 2019	5606	NR	Cont	g/day in last decade	cg02431260	ESAM	11	124628888	-0.00143049	8.43e-09	NR	NR	NR
Dugue 2019	5606	NR	Cont	g/day in last decade	cg02459569	LASS2	1	150944634	-0.0010377	8.97e-10	NR	NR	NR
Dugue 2019	5606	NR	Cont	g/day in last decade	cg02571142	DKK4	8	42234803	-0.00143126	2.83e-09	NR	NR	NR
Dugue 2019	5606	NR	Cont	g/day in last decade	cg02578470	MCM2	3	127320670	-0.00119778	9.76e-12	NR	NR	NR
Dugue 2019	5606	NR	Cont	g/day in last decade	cg02583484	HNRNPA1	12	54677008	-0.00139827	1.44e-16	NR	NR	NR
Dugue 2019	5606	NR	Cont	g/day in last decade	cg02647520	HSD17B8	6	33173218	-0.000995673	7.01e-09	NR	NR	NR
Dugue 2019	5606	NR	Cont	g/day in last decade	cg02654940	HMGA1	6	34206400	-0.000861722	6.74e-09	NR	NR	NR
Dugue 2019	5606	NR	Cont	g/day in last decade	cg02661372	IER5	1	181056912	-0.00115286	6.39e-09	NR	NR	NR
Dugue 2019	5606	NR	Cont	g/day in last decade	cg02711608	SLC1A5	19	47287964	-0.00213093	2.41e-24	NR	NR	NR
Dugue 2019	5606	NR	Cont	g/day in last decade	cg02717339	ANKRD39	2	97524767	-0.00102388	2.85e-08	NR	NR	NR
Dugue 2019	5606	NR	Cont	g/day in last decade	cg02719954		8	23830907	-0.00200674	4.24e-09	NR	NR	NR
Dugue 2019	5606	NR	Cont	g/day in last decade	cg02771362	SH2D3C	9	130541859	-0.000813059	2.43e-08	NR	NR	NR
Dugue 2019	5606	NR	Cont	g/day in last decade	cg03006527		1	155043967	-0.000939841	2.27e-08	NR	NR	NR
Dugue 2019	5606	NR	Cont	g/day in last decade	cg03044573	GAS5	1	173835265	-0.00284833	1.23e-14	NR	NR	NR
Dugue 2019	5606	NR	Cont	g/day in last decade	cg03068497	GARS	7	30635838	-0.00205206	1.05e-08	NR	NR	NR
Dugue 2019	5606	NR	Cont	g/day in last decade	cg03149958		6	36326677	-0.00195896	1.86e-09	NR	NR	NR
Dugue 2019	5606	NR	Cont	g/day in last decade	cg03184011		20	39945503	-0.000678843	3.79e-08	NR	NR	NR
Dugue 2019	5606	NR	Cont	g/day in last decade	cg03217115		2	118942841	-0.00144547	4.25e-10	NR	NR	NR
Dugue 2019	5606	NR	Cont	g/day in last decade	cg03260624	CDC7	1	91970722	-0.00119278	9.49e-08	NR	NR	NR
Dugue 2019	5606	NR	Cont	g/day in last decade	cg03339609	LSM14A	19	34662636	-0.00133224	5.64e-10	NR	NR	NR
Dugue 2019	5606	NR	Cont	g/day in last decade	cg03450635	FAM198B	4	159094213	-0.00117015	1.99e-09	NR	NR	NR
Dugue 2019	5606	NR	Cont	g/day in last decade	cg03507326	LOC100128788	16	2801952	-0.00189702	8.6e-09	NR	NR	NR
Dugue 2019	5606	NR	Cont	g/day in last decade	cg03523740	TXLNA	1	32645027	-0.00087139	8.02e-11	NR	NR	NR
Dugue 2019	5606	NR	Cont	g/day in last decade	cg03533472	GPT2	16	46919112	-0.00135591	7.53e-08	NR	NR	NR
Dugue 2019	5606	NR	Cont	g/day in last decade	cg03599037	C10orf58	10	82172508	-0.000636324	6.97e-08	NR	NR	NR
Dugue 2019	5606	NR	Cont	g/day in last decade	cg03603381	RASGRP1	15	38857474	-0.000899544	2.49e-09	NR	NR	NR
Dugue 2019	5606	NR	Cont	g/day in last decade	cg03606511	BCL11A	2	60735530	-0.00094559	2.12e-08	NR	NR	NR
Dugue 2019	5606	NR	Cont	g/day in last decade	cg03607573	TAF1D	11	93471889	-0.00137519	7.63e-12	NR	NR	NR
Dugue 2019	5606	NR	Cont	g/day in last decade	cg03700669	SMPDL3B	1	28284100	-0.000962036	1.93e-08	NR	NR	NR
Dugue 2019	5606	NR	Cont	g/day in last decade	cg03725309	SARS	1	109757585	-0.00176957	4.14e-12	NR	NR	NR
Dugue 2019	5606	NR	Cont	g/day in last decade	cg03732014	BACH1	21	30676184	-0.00105564	1.38e-09	NR	NR	NR
Dugue 2019	5606	NR	Cont	g/day in last decade	cg03845837	HSF4	16	67203406	-0.00141001	2.27e-09	NR	NR	NR
Dugue 2019	5606	NR	Cont	g/day in last decade	cg03935116	FAM60A	12	31476565	-0.00119342	3.42e-08	NR	NR	NR
Dugue 2019	5606	NR	Cont	g/day in last decade	cg04091927		8	141519270	-0.00113281	1.24e-08	NR	NR	NR
Dugue 2019	5606	NR	Cont	g/day in last decade	cg04118190	DUSP2	2	96812528	-0.000934788	8.29e-09	NR	NR	NR
Dugue 2019	5606	NR	Cont	g/day in last decade	cg04162032	LOC646627	1	248902767	-0.000920636	2.46e-08	NR	NR	NR
Dugue 2019	5606	NR	Cont	g/day in last decade	cg04172771	SNTG1	8	50892702	-0.00167912	1.86e-10	NR	NR	NR
Dugue 2019	5606	NR	Cont	g/day in last decade	cg04191300	KCNJ1	11	128729652	-0.00186537	1.18e-10	NR	NR	NR
Dugue 2019	5606	NR	Cont	g/day in last decade	cg04261072	RBM26	13	79977499	-0.00133612	7.36e-11	NR	NR	NR
Dugue 2019	5606	NR	Cont	g/day in last decade	cg04367503	NFIX	19	13121571	-0.00280084	2.16e-13	NR	NR	NR
Dugue 2019	5606	NR	Cont	g/day in last decade	cg04370442	TEPP	16	58019866	-0.00374291	1.54e-09	NR	NR	NR
Dugue 2019	5606	NR	Cont	g/day in last decade	cg04383058	PITPNM1	11	67273507	-0.000977408	1.49e-08	NR	NR	NR
Dugue 2019	5606	NR	Cont	g/day in last decade	cg04460609	LDB2	4	16532808	-0.00168041	5.07e-14	NR	NR	NR
Dugue 2019	5606	NR	Cont	g/day in last decade	cg04561005	KSR1	17	25872931	-0.00109564	2.64e-09	NR	NR	NR
Dugue 2019	5606	NR	Cont	g/day in last decade	cg04577162	RFC2	7	73667397	-0.00133681	4.05e-10	NR	NR	NR
Dugue 2019	5606	NR	Cont	g/day in last decade	cg04622454	NELF	9	140349128	-0.000845175	4.52e-09	NR	NR	NR
Dugue 2019	5606	NR	Cont	g/day in last decade	cg04730047	TBC1D23	3	99979355	-0.00135926	1.44e-08	NR	NR	NR
Dugue 2019	5606	NR	Cont	g/day in last decade	cg04891961	ANKRD13B	17	27939900	-0.00157402	4.02e-08	NR	NR	NR
Dugue 2019	5606	NR	Cont	g/day in last decade	cg04916802	MIR548F5	13	36052985	-0.00160344	1.09e-08	NR	NR	NR
Dugue 2019	5606	NR	Cont	g/day in last decade	cg04957757	ST3GAL2	16	70463218	-0.00118349	5.91e-08	NR	NR	NR
Dugue 2019	5606	NR	Cont	g/day in last decade	cg05104080	ILKAP	2	239112693	-0.00101611	2.4e-08	NR	NR	NR
Dugue 2019	5606	NR	Cont	g/day in last decade	cg05185634	ADCY4	14	24804750	-0.000812969	3.53e-10	NR	NR	NR
Dugue 2019	5606	NR	Cont	g/day in last decade	cg05242244	CSAD	12	53553086	-0.000797006	8.84e-10	NR	NR	NR
Dugue 2019	5606	NR	Cont	g/day in last decade	cg05288253	ANKRD11	16	89552259	-0.00110147	2.53e-15	NR	NR	NR
Dugue 2019	5606	NR	Cont	g/day in last decade	cg05356319	NFIX	19	13122449	-0.00181455	7.87e-12	NR	NR	NR
Dugue 2019	5606	NR	Cont	g/day in last decade	cg05510337	ESRP2	16	68268252	-0.000664131	9.45e-08	NR	NR	NR
Dugue 2019	5606	NR	Cont	g/day in last decade	cg05512483	SNORD30	11	62621791	-0.00146658	8.6e-10	NR	NR	NR
Dugue 2019	5606	NR	Cont	g/day in last decade	cg05644767	ITGAX	16	31366118	-0.00100859	9.3e-08	NR	NR	NR
Dugue 2019	5606	NR	Cont	g/day in last decade	cg05649922	ARID1A	1	27029290	-0.0008541	1.6e-08	NR	NR	NR
Dugue 2019	5606	NR	Cont	g/day in last decade	cg05721773	FAIM3	1	207083336	-0.00071104	2.01e-08	NR	NR	NR
Dugue 2019	5606	NR	Cont	g/day in last decade	cg05796704	FBXO44	1	11714218	-0.00123771	2.92e-08	NR	NR	NR
Dugue 2019	5606	NR	Cont	g/day in last decade	cg05958351	SRRM2	16	2804731	-0.00102493	1.22e-08	NR	NR	NR
Dugue 2019	5606	NR	Cont	g/day in last decade	cg06038367	CORO1A	16	30198370	-0.0020841	4.94e-08	NR	NR	NR
Dugue 2019	5606	NR	Cont	g/day in last decade	cg06372223	SLC7A5	16	87899784	-0.000902155	2.95e-09	NR	NR	NR
Dugue 2019	5606	NR	Cont	g/day in last decade	cg06382664	RELT	11	73098877	-0.000983257	1.2e-08	NR	NR	NR
Dugue 2019	5606	NR	Cont	g/day in last decade	cg06468626	FAM196B	5	169409235	-0.00189262	4.91e-08	NR	NR	NR
Dugue 2019	5606	NR	Cont	g/day in last decade	cg06469895	TERF2	16	69418206	-0.00116561	4.2e-12	NR	NR	NR
Dugue 2019	5606	NR	Cont	g/day in last decade	cg06487082	ZNF532	18	56530106	-0.00131241	6.39e-08	NR	NR	NR
Dugue 2019	5606	NR	Cont	g/day in last decade	cg06534313		16	16405520	-0.000433641	4.57e-08	NR	NR	NR
Dugue 2019	5606	NR	Cont	g/day in last decade	cg06577850		7	84002356	-0.00143552	8.9e-08	NR	NR	NR
Dugue 2019	5606	NR	Cont	g/day in last decade	cg06644515	SNORD47	1	173834831	-0.00158795	5.52e-17	NR	NR	NR
Dugue 2019	5606	NR	Cont	g/day in last decade	cg06688763	CDK6	7	92238207	-0.00294261	4.47e-13	NR	NR	NR
Dugue 2019	5606	NR	Cont	g/day in last decade	cg06690548	SLC7A11	4	139162808	-0.00660176	7.39e-70	NR	NR	NR
Dugue 2019	5606	NR	Cont	g/day in last decade	cg06759518	RYBP	3	72496799	-0.00133031	9.71e-09	NR	NR	NR
Dugue 2019	5606	NR	Cont	g/day in last decade	cg06799321	CES3	16	66995143	-0.00119616	5.69e-08	NR	NR	NR
Dugue 2019	5606	NR	Cont	g/day in last decade	cg06829760	FAM49A	2	16845412	-0.00119482	1.83e-14	NR	NR	NR
Dugue 2019	5606	NR	Cont	g/day in last decade	cg06850687		12	56587526	-0.00138411	6.65e-08	NR	NR	NR
Dugue 2019	5606	NR	Cont	g/day in last decade	cg06983052	LRRC8D	1	90288099	-0.0012013	1.88e-08	NR	NR	NR
Dugue 2019	5606	NR	Cont	g/day in last decade	cg07028396		10	93805682	-0.00179477	2.4e-08	NR	NR	NR
Dugue 2019	5606	NR	Cont	g/day in last decade	cg07175797		16	50317656	-0.000849591	4.31e-10	NR	NR	NR
Dugue 2019	5606	NR	Cont	g/day in last decade	cg07298431	PRDM10	11	129817649	-0.000886225	1.14e-08	NR	NR	NR
Dugue 2019	5606	NR	Cont	g/day in last decade	cg07519229		22	41486835	-0.00158818	9.83e-08	NR	NR	NR
Dugue 2019	5606	NR	Cont	g/day in last decade	cg07567724	GATAD2B	1	153777721	-0.00159468	1.05e-14	NR	NR	NR
Dugue 2019	5606	NR	Cont	g/day in last decade	cg07577824	SNX5	20	17943403	-0.00109701	1.41e-09	NR	NR	NR
Dugue 2019	5606	NR	Cont	g/day in last decade	cg07626482	SLC1A5	19	47289503	-0.000964261	1.12e-11	NR	NR	NR
Dugue 2019	5606	NR	Cont	g/day in last decade	cg07797660	PRDM16	1	3239139	-0.000771251	5.88e-10	NR	NR	NR
Dugue 2019	5606	NR	Cont	g/day in last decade	cg07807470	SNHG3-RCC1	1	28837350	-0.00114501	5.05e-08	NR	NR	NR
Dugue 2019	5606	NR	Cont	g/day in last decade	cg07814318	KLF13	15	31624584	-0.00136342	3.42e-09	NR	NR	NR
Dugue 2019	5606	NR	Cont	g/day in last decade	cg07856667		10	94455710	-0.00340256	1.97e-09	NR	NR	NR
Dugue 2019	5606	NR	Cont	g/day in last decade	cg07870378	FAM100A	16	4665298	-0.00130238	5.36e-08	NR	NR	NR
Dugue 2019	5606	NR	Cont	g/day in last decade	cg08077617	CES1	16	55868196	-0.00237864	4.79e-08	NR	NR	NR
Dugue 2019	5606	NR	Cont	g/day in last decade	cg08115371	ODZ4	11	79115706	-0.00229142	6.24e-15	NR	NR	NR
Dugue 2019	5606	NR	Cont	g/day in last decade	cg08170227	ACTN1	14	69422517	-0.00103057	6.07e-08	NR	NR	NR
Dugue 2019	5606	NR	Cont	g/day in last decade	cg08170911	PRKCD	3	53202324	-0.000733056	1.84e-10	NR	NR	NR
Dugue 2019	5606	NR	Cont	g/day in last decade	cg08189198	NIN	14	51290136	-0.00126078	6.15e-08	NR	NR	NR
Dugue 2019	5606	NR	Cont	g/day in last decade	cg08244750	OTUB2	14	94494115	-0.00139809	2.85e-08	NR	NR	NR
Dugue 2019	5606	NR	Cont	g/day in last decade	cg08276755		20	30196714	-0.00122031	5.04e-08	NR	NR	NR
Dugue 2019	5606	NR	Cont	g/day in last decade	cg08297686	RAD51L1	14	68943486	-0.00124374	9.37e-12	NR	NR	NR
Dugue 2019	5606	NR	Cont	g/day in last decade	cg08312149	HDGF2	19	4475055	-0.000838421	5.15e-08	NR	NR	NR
Dugue 2019	5606	NR	Cont	g/day in last decade	cg08604960	ADAM19	5	157003436	-0.00125138	5.72e-08	NR	NR	NR
Dugue 2019	5606	NR	Cont	g/day in last decade	cg08647039	NFIX	19	13120987	-0.0011087	1.49e-08	NR	NR	NR
Dugue 2019	5606	NR	Cont	g/day in last decade	cg08761535	ZNRF1	16	75079000	-0.00124089	4.89e-08	NR	NR	NR
Dugue 2019	5606	NR	Cont	g/day in last decade	cg08790319	RAB26	16	2203008	-0.000958432	4.58e-08	NR	NR	NR
Dugue 2019	5606	NR	Cont	g/day in last decade	cg08899105	CHD2	15	93450671	-0.00088081	2.6e-09	NR	NR	NR
Dugue 2019	5606	NR	Cont	g/day in last decade	cg08984272		2	149884320	-0.00111194	7.32e-09	NR	NR	NR
Dugue 2019	5606	NR	Cont	g/day in last decade	cg09008322	NSD1	5	176726772	-0.00072031	4.73e-09	NR	NR	NR
Dugue 2019	5606	NR	Cont	g/day in last decade	cg09190408	PPP1CA	11	67170610	-0.000986087	3.63e-08	NR	NR	NR
Dugue 2019	5606	NR	Cont	g/day in last decade	cg09297903	DKK4	8	42234798	-0.0012248	4.4e-09	NR	NR	NR
Dugue 2019	5606	NR	Cont	g/day in last decade	cg09419102		11	65550444	-0.000883931	8.94e-08	NR	NR	NR
Dugue 2019	5606	NR	Cont	g/day in last decade	cg09424896	CIB3	19	16284351	-0.000903478	1.79e-09	NR	NR	NR
Dugue 2019	5606	NR	Cont	g/day in last decade	cg09496748	ANKRD44	2	198029215	-0.00152681	3.43e-08	NR	NR	NR
Dugue 2019	5606	NR	Cont	g/day in last decade	cg09635954	PRR15	7	29605624	-0.00217413	3.48e-11	NR	NR	NR
Dugue 2019	5606	NR	Cont	g/day in last decade	cg09646173	PDE6A	5	149317669	-0.00137404	1.83e-08	NR	NR	NR
Dugue 2019	5606	NR	Cont	g/day in last decade	cg09737197	CPT1A	11	68607675	-0.00252256	3.74e-11	NR	NR	NR
Dugue 2019	5606	NR	Cont	g/day in last decade	cg09906145	FAM65A	16	67562424	-0.000790651	4e-11	NR	NR	NR
Dugue 2019	5606	NR	Cont	g/day in last decade	cg09981830		7	55376098	-0.00167115	2.39e-10	NR	NR	NR
Dugue 2019	5606	NR	Cont	g/day in last decade	cg10005565		2	235578952	-0.00138388	9.04e-10	NR	NR	NR
Dugue 2019	5606	NR	Cont	g/day in last decade	cg01832549	CAPZB	1	19774989	-0.00117722	9.66e-08	NR	NR	NR
Dugue 2019	5606	NR	Cont	g/day in last decade	cg01080902	ZNF575	19	44039870	-0.00110644	9.43e-08	NR	NR	NR
Dugue 2019	5606	NR	Cont	g/day in last decade	cg10143507		2	118943004	-0.00127054	2.86e-09	NR	NR	NR
Dugue 2019	5606	NR	Cont	g/day in last decade	cg18824549	FAM117A	17	47807591	-0.00123233	6.37e-08	NR	NR	NR
Dugue 2019	5606	NR	Cont	g/day in last decade	cg05142833		2	200604518	-0.0010211	6.25e-08	NR	NR	NR
Dugue 2019	5606	NR	Cont	g/day in last decade	cg13924715		11	10750890	-0.00369217	6.24e-08	NR	NR	NR
Dugue 2019	5606	NR	Cont	g/day in last decade	cg18770635		22	50984368	-0.00142222	5.7e-08	NR	NR	NR
Dugue 2019	5606	NR	Cont	g/day in last decade	cg10439456	TRIM69	15	45028270	-0.00193436	1.45e-09	NR	NR	NR
Dugue 2019	5606	NR	Cont	g/day in last decade	cg01856529	CBX5	12	54653091	-0.00141951	5.28e-08	NR	NR	NR
Dugue 2019	5606	NR	Cont	g/day in last decade	cg19666600	GPN3	12	110907609	-0.00148926	5.02e-08	NR	NR	NR
Dugue 2019	5606	NR	Cont	g/day in last decade	cg10589813		20	48809978	-0.00118099	1.45e-12	NR	NR	NR
Dugue 2019	5606	NR	Cont	g/day in last decade	cg01419539	ZNF595	4	53010	-0.000745144	4.27e-08	NR	NR	NR
Dugue 2019	5606	NR	Cont	g/day in last decade	cg10676309		5	137685565	-0.00114676	5.92e-10	NR	NR	NR
Dugue 2019	5606	NR	Cont	g/day in last decade	cg08527448	RBM22	5	150070582	-0.00110182	3.99e-08	NR	NR	NR
Dugue 2019	5606	NR	Cont	g/day in last decade	cg01676795	POR	7	75586348	-0.00142642	3.55e-08	NR	NR	NR
Dugue 2019	5606	NR	Cont	g/day in last decade	cg24447042	SMARCA1	X	128657893	-0.0017775	3.46e-08	NR	NR	NR
Dugue 2019	5606	NR	Cont	g/day in last decade	cg12408911	SLC7A5	16	87903671	-0.000905458	3.45e-08	NR	NR	NR
Dugue 2019	5606	NR	Cont	g/day in last decade	cg11294269	GALNT9	12	132685428	-0.00111094	3.39e-08	NR	NR	NR
Dugue 2019	5606	NR	Cont	g/day in last decade	cg10816169		11	66080868	-0.000841571	2.79e-08	NR	NR	NR
Dugue 2019	5606	NR	Cont	g/day in last decade	cg01610915	THOC5	22	29950274	-0.00124014	3e-08	NR	NR	NR
Dugue 2019	5606	NR	Cont	g/day in last decade	cg17662369	TBC1D9B	5	179333958	-0.00136936	2.92e-08	NR	NR	NR
Dugue 2019	5606	NR	Cont	g/day in last decade	cg19497444	SLC22A18	11	2930794	-0.00224032	2.47e-08	NR	NR	NR
Dugue 2019	5606	NR	Cont	g/day in last decade	cg14854355	SARM1	17	26708366	-0.00113845	2.44e-08	NR	NR	NR
Dugue 2019	5606	NR	Cont	g/day in last decade	cg04726200	SLC22A18	11	2930485	-0.00200297	2.27e-08	NR	NR	NR
Dugue 2019	5606	NR	Cont	g/day in last decade	cg11127915	NFIX	19	13122381	-0.00246351	3.68e-12	NR	NR	NR
Dugue 2019	5606	NR	Cont	g/day in last decade	cg13072186	TBL1XR1	3	176904010	-0.00141227	1.72e-08	NR	NR	NR
Dugue 2019	5606	NR	Cont	g/day in last decade	cg25769566		6	31651278	-0.00219112	1.63e-08	NR	NR	NR
Dugue 2019	5606	NR	Cont	g/day in last decade	cg07507446		6	29928362	-0.00129443	1.59e-08	NR	NR	NR
Dugue 2019	5606	NR	Cont	g/day in last decade	cg11316386	C1orf229	1	247275808	-0.0014539	1.52e-08	NR	NR	NR
Dugue 2019	5606	NR	Cont	g/day in last decade	cg11253416	CHMP4C	8	82643680	-0.00167682	1.39e-08	NR	NR	NR
Dugue 2019	5606	NR	Cont	g/day in last decade	cg13716321	SLC34A3	9	140130136	-0.00153969	1.35e-08	NR	NR	NR
Dugue 2019	5606	NR	Cont	g/day in last decade	cg11376147	SLC43A1	11	57261198	-0.00149861	1.25e-18	NR	NR	NR
Dugue 2019	5606	NR	Cont	g/day in last decade	cg11440375	DKFZP686I15217	6	2988321	-0.000808048	5.34e-09	NR	NR	NR
Dugue 2019	5606	NR	Cont	g/day in last decade	cg11551560		15	70528789	-0.000996766	1.15e-08	NR	NR	NR
Dugue 2019	5606	NR	Cont	g/day in last decade	cg16315334	REEP4	8	21996639	0.00185453	6.44e-09	NR	NR	NR
Dugue 2019	5606	NR	Cont	g/day in last decade	cg11613559	INPP5F	10	121577971	-0.00214047	4.59e-09	NR	NR	NR
Dugue 2019	5606	NR	Cont	g/day in last decade	cg00312125	PLAC8	4	84030111	-0.00184378	3.46e-09	NR	NR	NR
Dugue 2019	5606	NR	Cont	g/day in last decade	cg11681597	SH3BP5L	1	249116587	-0.000734248	9.46e-08	NR	NR	NR
Dugue 2019	5606	NR	Cont	g/day in last decade	cg11701312	RPS5	19	58897497	-0.000964948	3.54e-09	NR	NR	NR
Dugue 2019	5606	NR	Cont	g/day in last decade	cg11826008	CPNE1	20	34249284	-0.0013413	8.45e-11	NR	NR	NR
Dugue 2019	5606	NR	Cont	g/day in last decade	cg12069540	C10orf58	10	82173570	-0.000897025	4.78e-09	NR	NR	NR
Dugue 2019	5606	NR	Cont	g/day in last decade	cg12194745	BAHCC1	17	79423649	-0.00118946	5.76e-10	NR	NR	NR
Dugue 2019	5606	NR	Cont	g/day in last decade	cg12490835		10	22623821	-0.00107479	3.65e-08	NR	NR	NR
Dugue 2019	5606	NR	Cont	g/day in last decade	cg12499872	TEPP	16	58019893	-0.00178194	1.66e-08	NR	NR	NR
Dugue 2019	5606	NR	Cont	g/day in last decade	cg12501995		7	142333497	-0.0013104	7.94e-08	NR	NR	NR
Dugue 2019	5606	NR	Cont	g/day in last decade	cg12670943	POLDIP3	22	43006541	-0.00111075	7.35e-10	NR	NR	NR
Dugue 2019	5606	NR	Cont	g/day in last decade	cg12807764		5	146864669	-0.0015236	4.04e-09	NR	NR	NR
Dugue 2019	5606	NR	Cont	g/day in last decade	cg25318579		3	187672350	-0.00138288	2.26e-10	NR	NR	NR
Dugue 2019	5606	NR	Cont	g/day in last decade	cg12825509	TRA2B	3	185648568	-0.00241041	1.93e-26	NR	NR	NR
Dugue 2019	5606	NR	Cont	g/day in last decade	cg12866859	HEXIM1	17	43224332	-0.00128439	1.52e-12	NR	NR	NR
Dugue 2019	5606	NR	Cont	g/day in last decade	cg12916723	NKG7	19	51876788	-0.00101084	6.34e-08	NR	NR	NR
Dugue 2019	5606	NR	Cont	g/day in last decade	cg12934382	GRM2	3	51741135	-0.00171606	1.3e-09	NR	NR	NR
Dugue 2019	5606	NR	Cont	g/day in last decade	cg13092108	RPS6KA1	1	26857284	-0.000812895	1.56e-08	NR	NR	NR
Dugue 2019	5606	NR	Cont	g/day in last decade	cg13408712	PRDM10	11	129817591	-0.000877382	2.78e-13	NR	NR	NR
Dugue 2019	5606	NR	Cont	g/day in last decade	cg13458211	B4GALT2	1	44444217	-0.000828011	4.84e-08	NR	NR	NR
Dugue 2019	5606	NR	Cont	g/day in last decade	cg13490403	LHX6	9	124982413	-0.00312996	6.54e-10	NR	NR	NR
Dugue 2019	5606	NR	Cont	g/day in last decade	cg13526915		14	24164078	-0.00151688	1.23e-08	NR	NR	NR
Dugue 2019	5606	NR	Cont	g/day in last decade	cg13551754	ECE1	1	21619913	-0.00111542	7.43e-08	NR	NR	NR
Dugue 2019	5606	NR	Cont	g/day in last decade	cg13702222	MBNL1	3	152017240	-0.00200336	2.86e-10	NR	NR	NR
Dugue 2019	5606	NR	Cont	g/day in last decade	cg13708910	ATPGD1	11	67183498	-0.000774586	4.25e-09	NR	NR	NR
Dugue 2019	5606	NR	Cont	g/day in last decade	cg13724812	TGFBR2	3	30689835	-0.00138456	1.65e-11	NR	NR	NR
Dugue 2019	5606	NR	Cont	g/day in last decade	cg13895343	SARM1	17	26708773	-0.00135128	3.65e-15	NR	NR	NR
Dugue 2019	5606	NR	Cont	g/day in last decade	cg13976502	C14orf43	14	74227875	-0.00129459	9.79e-10	NR	NR	NR
Dugue 2019	5606	NR	Cont	g/day in last decade	cg13980410		5	146870693	-0.0012495	4.34e-10	NR	NR	NR
Dugue 2019	5606	NR	Cont	g/day in last decade	cg13981001	RPL12	9	130211749	-0.00089377	9.81e-10	NR	NR	NR
Dugue 2019	5606	NR	Cont	g/day in last decade	cg14184886		19	46386226	-0.00142054	1.6e-10	NR	NR	NR
Dugue 2019	5606	NR	Cont	g/day in last decade	cg14264316		9	134280803	-0.00144696	3.86e-10	NR	NR	NR
Dugue 2019	5606	NR	Cont	g/day in last decade	cg14369329	KIAA0247	14	70104457	-0.000654675	9.65e-08	NR	NR	NR
Dugue 2019	5606	NR	Cont	g/day in last decade	cg14476101	PHGDH	1	120255992	-0.00341275	6.16e-34	NR	NR	NR
Dugue 2019	5606	NR	Cont	g/day in last decade	cg14628343		8	58788163	-0.00117292	7.09e-08	NR	NR	NR
Dugue 2019	5606	NR	Cont	g/day in last decade	cg14782678	TMEM102	17	7339721	-0.00132734	4.49e-08	NR	NR	NR
Dugue 2019	5606	NR	Cont	g/day in last decade	cg14868222	LTB	6	31548340	-0.00100608	1.14e-09	NR	NR	NR
Dugue 2019	5606	NR	Cont	g/day in last decade	cg14987431		10	94455650	-0.00323075	1.08e-09	NR	NR	NR
Dugue 2019	5606	NR	Cont	g/day in last decade	cg15114651	SLC1A5	19	47289410	-0.000786345	5.76e-12	NR	NR	NR
Dugue 2019	5606	NR	Cont	g/day in last decade	cg15241084	TLR7	X	12886121	-0.00173729	8.34e-08	NR	NR	NR
Dugue 2019	5606	NR	Cont	g/day in last decade	cg15451662	PNPLA6	19	7601318	-0.000755371	1.74e-08	NR	NR	NR
Dugue 2019	5606	NR	Cont	g/day in last decade	cg15514896		1	229074115	-0.00108979	1.91e-08	NR	NR	NR
Dugue 2019	5606	NR	Cont	g/day in last decade	cg15773890		6	17259549	-0.00125081	1.73e-08	NR	NR	NR
Dugue 2019	5606	NR	Cont	g/day in last decade	cg15804598	HEXIM1	17	43224418	-0.00107573	1.21e-15	NR	NR	NR
Dugue 2019	5606	NR	Cont	g/day in last decade	cg15880704	RBM20	10	112546110	-0.00085932	4.03e-11	NR	NR	NR
Dugue 2019	5606	NR	Cont	g/day in last decade	cg15915658		11	65262358	-0.00122298	4.95e-08	NR	NR	NR
Dugue 2019	5606	NR	Cont	g/day in last decade	cg15965301		17	75105832	-0.00210472	3.9e-08	NR	NR	NR
Dugue 2019	5606	NR	Cont	g/day in last decade	cg16100392	TAAR3	6	132931717	-0.00128627	4.76e-08	NR	NR	NR
Dugue 2019	5606	NR	Cont	g/day in last decade	cg16179607	PPP3R1	2	68476020	-0.00131182	3.98e-08	NR	NR	NR
Dugue 2019	5606	NR	Cont	g/day in last decade	cg16246545	PHGDH	1	120255941	-0.00172202	1.24e-17	NR	NR	NR
Dugue 2019	5606	NR	Cont	g/day in last decade	cg16290996	GAS5	1	173835989	-0.0018921	4.12e-12	NR	NR	NR
Dugue 2019	5606	NR	Cont	g/day in last decade	cg16702313	C14orf43	14	74251926	-0.000757291	1.79e-09	NR	NR	NR
Dugue 2019	5606	NR	Cont	g/day in last decade	cg16705273	SETBP1	18	42262885	-0.00142633	3.76e-09	NR	NR	NR
Dugue 2019	5606	NR	Cont	g/day in last decade	cg16723994	BZRAP1	17	56401623	-0.00145927	9.23e-10	NR	NR	NR
Dugue 2019	5606	NR	Cont	g/day in last decade	cg16834011	COMT	22	19931790	-0.00240404	2.31e-13	NR	NR	NR
Dugue 2019	5606	NR	Cont	g/day in last decade	cg16896539	HNRNPH3	10	70096482	-0.00172713	1.83e-09	NR	NR	NR
Dugue 2019	5606	NR	Cont	g/day in last decade	cg16914953	AP1S1	7	100798809	-0.00103685	7.38e-10	NR	NR	NR
Dugue 2019	5606	NR	Cont	g/day in last decade	cg16925459	HDAC9	7	18548581	-0.00159058	1.8e-09	NR	NR	NR
Dugue 2019	5606	NR	Cont	g/day in last decade	cg17058475	CPT1A	11	68607737	-0.003569	8.53e-18	NR	NR	NR
Dugue 2019	5606	NR	Cont	g/day in last decade	cg17331566	B4GALT2	1	44444305	-0.000993811	2.61e-08	NR	NR	NR
Dugue 2019	5606	NR	Cont	g/day in last decade	cg17344906	NFIX	19	13202507	-0.00124476	1.72e-08	NR	NR	NR
Dugue 2019	5606	NR	Cont	g/day in last decade	cg17378803		2	242823275	-0.00100835	5.09e-08	NR	NR	NR
Dugue 2019	5606	NR	Cont	g/day in last decade	cg17466510		1	116877566	-0.00130969	3.76e-08	NR	NR	NR
Dugue 2019	5606	NR	Cont	g/day in last decade	cg17473615	MAGED2	X	54835651	-0.00115284	9.26e-08	NR	NR	NR
Dugue 2019	5606	NR	Cont	g/day in last decade	cg17478203	STAT5A	17	40438393	-0.00101874	3.99e-11	NR	NR	NR
Dugue 2019	5606	NR	Cont	g/day in last decade	cg17493885	NSD1	5	176559558	-0.00161067	2.01e-08	NR	NR	NR
Dugue 2019	5606	NR	Cont	g/day in last decade	cg17552909		6	31801032	-0.00119023	4.02e-08	NR	NR	NR
Dugue 2019	5606	NR	Cont	g/day in last decade	cg17585031	KSR1	17	25798942	-0.00062597	4.94e-08	NR	NR	NR
Dugue 2019	5606	NR	Cont	g/day in last decade	cg17598574	RAP1A	1	112171207	-0.00101224	5.39e-10	NR	NR	NR
Dugue 2019	5606	NR	Cont	g/day in last decade	cg17705631	GNA12	7	2864192	-0.00144475	3.76e-10	NR	NR	NR
Dugue 2019	5606	NR	Cont	g/day in last decade	cg17710804	C1orf113	1	36771844	-0.00112535	4.16e-09	NR	NR	NR
Dugue 2019	5606	NR	Cont	g/day in last decade	cg17861836	C17orf56	17	79202505	-0.00165355	1.58e-08	NR	NR	NR
Dugue 2019	5606	NR	Cont	g/day in last decade	cg17962756		5	172769199	-0.00151095	1.63e-09	NR	NR	NR
Dugue 2019	5606	NR	Cont	g/day in last decade	cg18002437	LOC728875	1	144522237	-0.000616707	4.7e-08	NR	NR	NR
Dugue 2019	5606	NR	Cont	g/day in last decade	cg18018313	IRS1	2	227657192	-0.00102992	1.08e-08	NR	NR	NR
Dugue 2019	5606	NR	Cont	g/day in last decade	cg18033416	RHBDL3	17	30592033	-0.00114533	8.54e-08	NR	NR	NR
Dugue 2019	5606	NR	Cont	g/day in last decade	cg18120259	LOC100132354	6	43894639	-0.00191139	1.1e-20	NR	NR	NR
Dugue 2019	5606	NR	Cont	g/day in last decade	cg18159646	SNORD22	11	62621178	-0.00127622	1.67e-11	NR	NR	NR
Dugue 2019	5606	NR	Cont	g/day in last decade	cg18216249	RPAP3	12	48100805	-0.00145944	1e-08	NR	NR	NR
Dugue 2019	5606	NR	Cont	g/day in last decade	cg18259535		11	66092918	-0.000764821	1.25e-08	NR	NR	NR
Dugue 2019	5606	NR	Cont	g/day in last decade	cg18297349	MGC29506	5	138726375	-0.00128284	7.73e-11	NR	NR	NR
Dugue 2019	5606	NR	Cont	g/day in last decade	cg18335991	SEMA7A	15	74724562	-0.00108415	3.92e-08	NR	NR	NR
Dugue 2019	5606	NR	Cont	g/day in last decade	cg18336453	PTK7	6	43082296	-0.001269	2.12e-19	NR	NR	NR
Dugue 2019	5606	NR	Cont	g/day in last decade	cg18388547		1	35513161	-0.000915268	2.53e-11	NR	NR	NR
Dugue 2019	5606	NR	Cont	g/day in last decade	cg18487309	TBC1D9B	5	179333932	-0.00119216	5.71e-12	NR	NR	NR
Dugue 2019	5606	NR	Cont	g/day in last decade	cg18524934	NEURL3	2	97164073	-0.00190699	2.05e-08	NR	NR	NR
Dugue 2019	5606	NR	Cont	g/day in last decade	cg18590502	CCDC71	3	49203081	-0.00172008	2.28e-10	NR	NR	NR
Dugue 2019	5606	NR	Cont	g/day in last decade	cg18642234	GPX1	3	49394622	-0.000873761	3.36e-08	NR	NR	NR
Dugue 2019	5606	NR	Cont	g/day in last decade	cg18763536	ETV6	12	11812062	-0.00112381	1.12e-11	NR	NR	NR
Dugue 2019	5606	NR	Cont	g/day in last decade	cg19142553	HNRNPA2B1	7	26236069	-0.00105352	5.15e-09	NR	NR	NR
Dugue 2019	5606	NR	Cont	g/day in last decade	cg19169154	MFAP4	17	19287978	-0.000748574	3.55e-10	NR	NR	NR
Dugue 2019	5606	NR	Cont	g/day in last decade	cg19202384	PYCR1	17	79894511	-0.00125225	2.28e-12	NR	NR	NR
Dugue 2019	5606	NR	Cont	g/day in last decade	cg19351166	PIKFYVE	2	209133632	-0.00124592	2.47e-08	NR	NR	NR
Dugue 2019	5606	NR	Cont	g/day in last decade	cg19373099		2	210008092	-0.00198193	1.4e-09	NR	NR	NR
Dugue 2019	5606	NR	Cont	g/day in last decade	cg19390658	GARS	7	30636176	-0.00176763	8.08e-12	NR	NR	NR
Dugue 2019	5606	NR	Cont	g/day in last decade	cg19473623	C1GALT1	7	7224869	-0.00108536	2.7e-08	NR	NR	NR
Dugue 2019	5606	NR	Cont	g/day in last decade	cg19493651	B3GNT2	2	62428082	-0.00181961	6.82e-09	NR	NR	NR
Dugue 2019	5606	NR	Cont	g/day in last decade	cg19534753	MYLK	3	123340306	-0.00164648	2.64e-10	NR	NR	NR
Dugue 2019	5606	NR	Cont	g/day in last decade	cg19620383	RORA	15	60860767	-0.000928183	3.4e-08	NR	NR	NR
Dugue 2019	5606	NR	Cont	g/day in last decade	cg19693031	TXNIP	1	145441552	-0.00252769	5.18e-19	NR	NR	NR
Dugue 2019	5606	NR	Cont	g/day in last decade	cg19731612	NSD1	5	176559334	-0.00276533	9.61e-13	NR	NR	NR
Dugue 2019	5606	NR	Cont	g/day in last decade	cg19818308		14	75946745	-0.00130312	2.06e-09	NR	NR	NR
Dugue 2019	5606	NR	Cont	g/day in last decade	cg19939077	PPIF	10	81108060	-0.00168348	2.33e-11	NR	NR	NR
Dugue 2019	5606	NR	Cont	g/day in last decade	cg20033981	ELF1	13	41590153	-0.00223907	2.62e-09	NR	NR	NR
Dugue 2019	5606	NR	Cont	g/day in last decade	cg20146909	LRRC8D	1	90289611	-0.00117751	2.47e-10	NR	NR	NR
Dugue 2019	5606	NR	Cont	g/day in last decade	cg20379593		11	65198023	-0.00113932	5.53e-10	NR	NR	NR
Dugue 2019	5606	NR	Cont	g/day in last decade	cg20385395	SNHG4	5	138613030	-0.000978422	1.62e-09	NR	NR	NR
Dugue 2019	5606	NR	Cont	g/day in last decade	cg20494841		22	50984597	-0.00127888	8.37e-10	NR	NR	NR
Dugue 2019	5606	NR	Cont	g/day in last decade	cg20625334	STAM2	2	152991620	-0.00164358	1.6e-12	NR	NR	NR
Dugue 2019	5606	NR	Cont	g/day in last decade	cg20732076	TRERF1	6	42335231	-0.00192798	1.26e-10	NR	NR	NR
Dugue 2019	5606	NR	Cont	g/day in last decade	cg20732160	PFKFB4	3	48590040	-0.00132965	2.12e-12	NR	NR	NR
Dugue 2019	5606	NR	Cont	g/day in last decade	cg20841134	VPS54	2	64247030	-0.000618865	4.23e-08	NR	NR	NR
Dugue 2019	5606	NR	Cont	g/day in last decade	cg20945261	NUP210	3	13460618	-0.00078665	1.04e-08	NR	NR	NR
Dugue 2019	5606	NR	Cont	g/day in last decade	cg20954977	B3GNT7	2	232260116	-0.00152673	2.49e-08	NR	NR	NR
Dugue 2019	5606	NR	Cont	g/day in last decade	cg21118780	MAP4K4	2	102379567	-0.00120921	5.92e-08	NR	NR	NR
Dugue 2019	5606	NR	Cont	g/day in last decade	cg21161526		9	123691672	-0.00128484	9.55e-09	NR	NR	NR
Dugue 2019	5606	NR	Cont	g/day in last decade	cg21429551	GARS	7	30635762	-0.0023948	3.74e-12	NR	NR	NR
Dugue 2019	5606	NR	Cont	g/day in last decade	cg21626848	SC65	17	39969267	-0.00116654	3.5e-11	NR	NR	NR
Dugue 2019	5606	NR	Cont	g/day in last decade	cg21899500	GRM2	3	51740850	-0.00159969	6.47e-10	NR	NR	NR
Dugue 2019	5606	NR	Cont	g/day in last decade	cg21950166	SFN	1	27189349	-0.00117014	8.24e-08	NR	NR	NR
Dugue 2019	5606	NR	Cont	g/day in last decade	cg21993290	GIGYF2	2	233703120	-0.00114329	2.71e-09	NR	NR	NR
Dugue 2019	5606	NR	Cont	g/day in last decade	cg22023664	GNG7	19	2619608	-0.000905499	5.96e-10	NR	NR	NR
Dugue 2019	5606	NR	Cont	g/day in last decade	cg22121647	TMEM140	7	134845376	-0.00120275	3.4e-10	NR	NR	NR
Dugue 2019	5606	NR	Cont	g/day in last decade	cg22304262	SLC1A5	19	47287778	-0.0019171	8.67e-12	NR	NR	NR
Dugue 2019	5606	NR	Cont	g/day in last decade	cg22499893	SFRS13A	1	24307535	-0.00194002	1.16e-09	NR	NR	NR
Dugue 2019	5606	NR	Cont	g/day in last decade	cg22566142	LNPEP	5	96298493	-0.00158062	3.41e-09	NR	NR	NR
Dugue 2019	5606	NR	Cont	g/day in last decade	cg22797644	HMGA1	6	34206491	-0.000864581	7.86e-10	NR	NR	NR
Dugue 2019	5606	NR	Cont	g/day in last decade	cg22998777	RNASE2	14	21422605	-0.00108243	3.53e-09	NR	NR	NR
Dugue 2019	5606	NR	Cont	g/day in last decade	cg23069057		4	14867316	-0.0011633	1.18e-08	NR	NR	NR
Dugue 2019	5606	NR	Cont	g/day in last decade	cg23109891	SOX10	22	38379218	-0.00216109	8.21e-09	NR	NR	NR
Dugue 2019	5606	NR	Cont	g/day in last decade	cg23205886	SNHG4	5	138611766	-0.00109342	4.83e-14	NR	NR	NR
Dugue 2019	5606	NR	Cont	g/day in last decade	cg23371208	MIR130A	11	57408514	-0.000824725	6.39e-09	NR	NR	NR
Dugue 2019	5606	NR	Cont	g/day in last decade	cg23436584		12	98833359	-0.00108888	2.11e-11	NR	NR	NR
Dugue 2019	5606	NR	Cont	g/day in last decade	cg23533285	HLA-B	6	31322348	-0.00102682	3.08e-08	NR	NR	NR
Dugue 2019	5606	NR	Cont	g/day in last decade	cg23629150	TOP1MT	8	144416404	-0.00164628	7.36e-08	NR	NR	NR
Dugue 2019	5606	NR	Cont	g/day in last decade	cg23634177	MGC13005	2	114357261	-0.000487763	7.21e-09	NR	NR	NR
Dugue 2019	5606	NR	Cont	g/day in last decade	cg23654112	TBC1D24	16	2525928	-0.000697464	9.89e-10	NR	NR	NR
Dugue 2019	5606	NR	Cont	g/day in last decade	cg23666378	KIAA0495	1	3663164	-0.00116387	6.4e-08	NR	NR	NR
Dugue 2019	5606	NR	Cont	g/day in last decade	cg23684449	GPT2	16	46919194	-0.000883064	2.97e-09	NR	NR	NR
Dugue 2019	5606	NR	Cont	g/day in last decade	cg23712594	PARP1	1	226591890	-0.00134745	8.26e-08	NR	NR	NR
Dugue 2019	5606	NR	Cont	g/day in last decade	cg23831876	SLC1A4	2	65225988	-0.00137839	8.34e-09	NR	NR	NR
Dugue 2019	5606	NR	Cont	g/day in last decade	cg23930230		19	51598009	-0.00146607	2.02e-08	NR	NR	NR
Dugue 2019	5606	NR	Cont	g/day in last decade	cg24131262	ITPR1	3	4549756	-0.00115907	4.41e-08	NR	NR	NR
Dugue 2019	5606	NR	Cont	g/day in last decade	cg24135793	NFIX	19	13122567	-0.00141392	1.44e-09	NR	NR	NR
Dugue 2019	5606	NR	Cont	g/day in last decade	cg24237862	ELMO1	7	37026842	-0.00149394	9.72e-09	NR	NR	NR
Dugue 2019	5606	NR	Cont	g/day in last decade	cg24332710	AKR1A1	1	46016173	-0.00116771	7.47e-10	NR	NR	NR
Dugue 2019	5606	NR	Cont	g/day in last decade	cg24344074	MOV10	1	113218414	-0.00185461	1.13e-09	NR	NR	NR
Dugue 2019	5606	NR	Cont	g/day in last decade	cg24451117	MAP3K5	6	137094444	-0.00103051	2.61e-09	NR	NR	NR
Dugue 2019	5606	NR	Cont	g/day in last decade	cg24497361	RHOG	11	3858493	-0.00144092	2.66e-09	NR	NR	NR
Dugue 2019	5606	NR	Cont	g/day in last decade	cg24643922		10	134236975	-0.000907255	4.47e-08	NR	NR	NR
Dugue 2019	5606	NR	Cont	g/day in last decade	cg25305703		8	128378218	-0.00164885	5.81e-08	NR	NR	NR
Dugue 2019	5606	NR	Cont	g/day in last decade	cg25306932	LYSMD1	1	151132257	-0.00111485	5.91e-08	NR	NR	NR
Dugue 2019	5606	NR	Cont	g/day in last decade	cg25446191	SKIL	3	170077545	-0.00121945	1.9e-08	NR	NR	NR
Dugue 2019	5606	NR	Cont	g/day in last decade	cg25513776	MYLK4	6	2751204	-0.00105306	2.12e-08	NR	NR	NR
Dugue 2019	5606	NR	Cont	g/day in last decade	cg25693132	GRM2	3	51740741	-0.00164355	4.94e-10	NR	NR	NR
Dugue 2019	5606	NR	Cont	g/day in last decade	cg25739016	RCSD1	1	167638918	-0.00139231	1.23e-12	NR	NR	NR
Dugue 2019	5606	NR	Cont	g/day in last decade	cg25831522	ST5	11	8779964	-0.000958243	1.03e-09	NR	NR	NR
Dugue 2019	5606	NR	Cont	g/day in last decade	cg25998745		8	142028625	-0.00188441	3.97e-15	NR	NR	NR
Dugue 2019	5606	NR	Cont	g/day in last decade	cg26033504	CSRP1	1	201458737	-0.00121531	5.44e-09	NR	NR	NR
Dugue 2019	5606	NR	Cont	g/day in last decade	cg26062560	C3orf21	3	194979832	-0.00078302	1.95e-08	NR	NR	NR
Dugue 2019	5606	NR	Cont	g/day in last decade	cg26177760	BAT1	6	31507785	-0.00120397	9.58e-09	NR	NR	NR
Dugue 2019	5606	NR	Cont	g/day in last decade	cg26364091	CHADL	22	41633219	-0.000762041	6.08e-08	NR	NR	NR
Dugue 2019	5606	NR	Cont	g/day in last decade	cg26460530		22	39919067	-0.00119358	3.31e-09	NR	NR	NR
Dugue 2019	5606	NR	Cont	g/day in last decade	cg26480889		2	118942960	-0.00126262	4.41e-08	NR	NR	NR
Dugue 2019	5606	NR	Cont	g/day in last decade	cg26546113	DHX9	1	182810711	-0.00164693	4.8e-09	NR	NR	NR
Dugue 2019	5606	NR	Cont	g/day in last decade	cg26645468	PPP2CA	5	133559272	-0.00167516	6.82e-08	NR	NR	NR
Dugue 2019	5606	NR	Cont	g/day in last decade	cg26841068	PRELP	1	203456691	-0.00100787	3.33e-12	NR	NR	NR
Dugue 2019	5606	NR	Cont	g/day in last decade	cg26850469	SFMBT1	3	53051694	-0.00119645	8.29e-08	NR	NR	NR
Dugue 2019	5606	NR	Cont	g/day in last decade	cg26856289	SFRS13A	1	24307516	-0.00161595	4.68e-18	NR	NR	NR
Dugue 2019	5606	NR	Cont	g/day in last decade	cg26873338	CPSF6	12	69637167	-0.00155856	1e-11	NR	NR	NR
Dugue 2019	5606	NR	Cont	g/day in last decade	cg26910511	LRFN1	19	39799037	-0.00289241	1.92e-08	NR	NR	NR
Dugue 2019	5606	NR	Cont	g/day in last decade	cg26959945	MACC1	7	20233217	-0.00167008	1.15e-09	NR	NR	NR
Dugue 2019	5606	NR	Cont	g/day in last decade	cg27305510	C11orf48	11	62434716	-0.0012426	3.89e-08	NR	NR	NR
Dugue 2019	5606	NR	Cont	g/day in last decade	cg27464065	APOLD1	12	12940610	-0.00144256	5.22e-08	NR	NR	NR
Dugue 2019	5606	NR	Cont	g/day in last decade	cg27519140	RPP21	6	30312645	-0.00166272	1.68e-09	NR	NR	NR
Dugue 2019	5606	NR	Cont	g/day in last week	cg00028013	LOXL1	15	74218697	-0.0011464	8.02e-09	NR	NR	NR
Dugue 2019	5606	NR	Cont	g/day in last week	cg00061031	ANP32B	9	100744026	-0.00196555	2.82e-09	NR	NR	NR
Dugue 2019	5606	NR	Cont	g/day in last week	cg00062245	ITGA2B	17	42462260	-0.0011952	2.65e-08	NR	NR	NR
Dugue 2019	5606	NR	Cont	g/day in last week	cg00085438	MBNL1	3	152049980	-0.00185852	9.36e-17	NR	NR	NR
Dugue 2019	5606	NR	Cont	g/day in last week	cg00108715	NT5DC2	3	52565015	-0.00129716	5.97e-10	NR	NR	NR
Dugue 2019	5606	NR	Cont	g/day in last week	cg00123478	ZNF518B	4	10458165	-0.00198133	1.08e-08	NR	NR	NR
Dugue 2019	5606	NR	Cont	g/day in last week	cg00139681		7	106125168	-0.00159676	1.03e-14	NR	NR	NR
Dugue 2019	5606	NR	Cont	g/day in last week	cg00161791		21	45575014	-0.00128697	4.76e-10	NR	NR	NR
Dugue 2019	5606	NR	Cont	g/day in last week	cg00166216	FAM43A	3	194407860	-0.00340145	2.93e-15	NR	NR	NR
Dugue 2019	5606	NR	Cont	g/day in last week	cg00252472		6	150739173	-0.00294823	3.63e-16	NR	NR	NR
Dugue 2019	5606	NR	Cont	g/day in last week	cg00303541	GRM2	3	51741280	-0.00227547	1.43e-08	NR	NR	NR
Dugue 2019	5606	NR	Cont	g/day in last week	cg00308631	ProSAPiP1	20	3149249	-0.000954966	8.1e-08	NR	NR	NR
Dugue 2019	5606	NR	Cont	g/day in last week	cg00326958	HNRNPF	10	43892075	-0.00251586	9.14e-12	NR	NR	NR
Dugue 2019	5606	NR	Cont	g/day in last week	cg00328227	C1orf59	1	109204325	-0.0019837	1.11e-14	NR	NR	NR
Dugue 2019	5606	NR	Cont	g/day in last week	cg00347863	SGCE	7	94220697	-0.00200755	3.86e-10	NR	NR	NR
Dugue 2019	5606	NR	Cont	g/day in last week	cg00360794	LTK	15	41803850	-0.00141813	1.47e-08	NR	NR	NR
Dugue 2019	5606	NR	Cont	g/day in last week	cg00419702	BAIAP2L2	22	38485294	-0.00205892	1.3e-10	NR	NR	NR
Dugue 2019	5606	NR	Cont	g/day in last week	cg00422488	ANP32B	9	100747767	-0.00327277	6.89e-23	NR	NR	NR
Dugue 2019	5606	NR	Cont	g/day in last week	cg00423486	RERE	1	8491132	-0.00102478	9.52e-12	NR	NR	NR
Dugue 2019	5606	NR	Cont	g/day in last week	cg00468395	XPO6	16	28193063	-0.00162687	1.09e-10	NR	NR	NR
Dugue 2019	5606	NR	Cont	g/day in last week	cg00505318	UBA3	3	69130918	-0.00105133	2.31e-09	NR	NR	NR
Dugue 2019	5606	NR	Cont	g/day in last week	cg00517855	RPL8	8	146016408	-0.000875053	2e-08	NR	NR	NR
Dugue 2019	5606	NR	Cont	g/day in last week	cg00550955		22	22012657	-0.00167369	1.41e-09	NR	NR	NR
Dugue 2019	5606	NR	Cont	g/day in last week	cg00574412	ABHD15	17	27892866	-0.00132853	2.23e-13	NR	NR	NR
Dugue 2019	5606	NR	Cont	g/day in last week	cg00574958	CPT1A	11	68607622	-0.00314252	8.33e-17	NR	NR	NR
Dugue 2019	5606	NR	Cont	g/day in last week	cg00622166	GPT2	16	46919021	-0.00138152	4.21e-13	NR	NR	NR
Dugue 2019	5606	NR	Cont	g/day in last week	cg00639656	SNORD42A	17	27050360	-0.000994152	2.16e-11	NR	NR	NR
Dugue 2019	5606	NR	Cont	g/day in last week	cg00664406	GRM2	3	51740875	-0.00169671	4.43e-10	NR	NR	NR
Dugue 2019	5606	NR	Cont	g/day in last week	cg00716257	JDP2	14	75897417	-0.00294116	2.21e-08	NR	NR	NR
Dugue 2019	5606	NR	Cont	g/day in last week	cg00827581	RAVER1	19	10434088	0.00190192	4.24e-08	NR	NR	NR
Dugue 2019	5606	NR	Cont	g/day in last week	cg00872865		3	112770545	-0.00168084	8.73e-08	NR	NR	NR
Dugue 2019	5606	NR	Cont	g/day in last week	cg00889709	FAM110B	8	59043471	-0.00192552	1.79e-10	NR	NR	NR
Dugue 2019	5606	NR	Cont	g/day in last week	cg00944304	BAHD1	15	40738072	-0.00119983	3.34e-09	NR	NR	NR
Dugue 2019	5606	NR	Cont	g/day in last week	cg00944421	ESRP2	16	68269483	-0.00519694	8.82e-15	NR	NR	NR
Dugue 2019	5606	NR	Cont	g/day in last week	cg00947319	UBE2Z	17	47005597	-0.00103185	1.88e-10	NR	NR	NR
Dugue 2019	5606	NR	Cont	g/day in last week	cg00986580		14	22951241	-0.00202802	2.17e-15	NR	NR	NR
Dugue 2019	5606	NR	Cont	g/day in last week	cg00988350	GALE	1	24126048	-0.0010232	8.11e-10	NR	NR	NR
Dugue 2019	5606	NR	Cont	g/day in last week	cg01040890	FLT4	5	180073780	-0.00123737	3.64e-09	NR	NR	NR
Dugue 2019	5606	NR	Cont	g/day in last week	cg01046070	MLKL	16	74730199	-0.00213695	4.26e-08	NR	NR	NR
Dugue 2019	5606	NR	Cont	g/day in last week	cg01055562	COG2	1	230777685	-0.00141021	5.55e-11	NR	NR	NR
Dugue 2019	5606	NR	Cont	g/day in last week	cg01091099	SPTBN1	2	54815680	-0.00156024	1.21e-14	NR	NR	NR
Dugue 2019	5606	NR	Cont	g/day in last week	cg01211283	PEBP4	8	22735276	-0.00223634	4.16e-08	NR	NR	NR
Dugue 2019	5606	NR	Cont	g/day in last week	cg01309328	PSMB8	6	32811253	-0.00147971	4.63e-08	NR	NR	NR
Dugue 2019	5606	NR	Cont	g/day in last week	cg01419727		5	131438977	-0.00130542	1.92e-08	NR	NR	NR
Dugue 2019	5606	NR	Cont	g/day in last week	cg01425762	CMIP	16	81666633	0.000980481	9.17e-08	NR	NR	NR
Dugue 2019	5606	NR	Cont	g/day in last week	cg01439754		2	112293267	-0.00137075	2.25e-13	NR	NR	NR
Dugue 2019	5606	NR	Cont	g/day in last week	cg01475538	RRAS2	11	14381234	-0.000799719	8.43e-09	NR	NR	NR
Dugue 2019	5606	NR	Cont	g/day in last week	cg01557754	FGF11	17	7342661	-0.00105143	7.24e-11	NR	NR	NR
Dugue 2019	5606	NR	Cont	g/day in last week	cg01567051	CMIP	16	81512025	-0.00129683	1.38e-11	NR	NR	NR
Dugue 2019	5606	NR	Cont	g/day in last week	cg01594949	NRARP	9	140197890	-0.00156111	2.74e-11	NR	NR	NR
Dugue 2019	5606	NR	Cont	g/day in last week	cg01637169	NUP210	3	13459281	-0.00109567	2.21e-13	NR	NR	NR
Dugue 2019	5606	NR	Cont	g/day in last week	cg01642550		16	89098327	-0.0014613	4.47e-09	NR	NR	NR
Dugue 2019	5606	NR	Cont	g/day in last week	cg01719268	PAPD5	16	50244074	-0.000799209	2.94e-08	NR	NR	NR
Dugue 2019	5606	NR	Cont	g/day in last week	cg01735398	SLC5A10	17	18907305	-0.00210355	3.26e-12	NR	NR	NR
Dugue 2019	5606	NR	Cont	g/day in last week	cg01741041	ACTB	7	5567862	-0.00127624	2.33e-12	NR	NR	NR
Dugue 2019	5606	NR	Cont	g/day in last week	cg01810926	CPT2	1	53663981	-0.00109757	6.51e-12	NR	NR	NR
Dugue 2019	5606	NR	Cont	g/day in last week	cg01838971	SLC35C1	11	45825448	-0.000947794	5.21e-09	NR	NR	NR
Dugue 2019	5606	NR	Cont	g/day in last week	cg01882991		6	6677756	-0.00128276	6.98e-11	NR	NR	NR
Dugue 2019	5606	NR	Cont	g/day in last week	cg01901101		1	9486939	-0.00101969	1.28e-08	NR	NR	NR
Dugue 2019	5606	NR	Cont	g/day in last week	cg01940273		2	233284934	-0.00141179	1.64e-08	NR	NR	NR
Dugue 2019	5606	NR	Cont	g/day in last week	cg01972009	PITPNM1	11	67273431	-0.00162423	3.07e-12	NR	NR	NR
Dugue 2019	5606	NR	Cont	g/day in last week	cg01993576	SLC29A1	6	44187674	-0.00118516	1.21e-11	NR	NR	NR
Dugue 2019	5606	NR	Cont	g/day in last week	cg02004370	PDF	16	69362629	-0.00149472	1.96e-09	NR	NR	NR
Dugue 2019	5606	NR	Cont	g/day in last week	cg02104962		6	31548314	-0.00193014	1.35e-09	NR	NR	NR
Dugue 2019	5606	NR	Cont	g/day in last week	cg02187259	FAM49A	2	16804452	-0.00182892	2.99e-09	NR	NR	NR
Dugue 2019	5606	NR	Cont	g/day in last week	cg02256576	CES3	16	66995192	-0.00220196	3.23e-14	NR	NR	NR
Dugue 2019	5606	NR	Cont	g/day in last week	cg02314339		10	91020653	-0.00146776	1.39e-08	NR	NR	NR
Dugue 2019	5606	NR	Cont	g/day in last week	cg02341119	MGAT5B	17	74866479	-0.00103559	1.11e-08	NR	NR	NR
Dugue 2019	5606	NR	Cont	g/day in last week	cg02359132	GTF3C6	6	111279585	-0.00247259	5.15e-11	NR	NR	NR
Dugue 2019	5606	NR	Cont	g/day in last week	cg02375166		11	58291656	-0.00160142	5.73e-10	NR	NR	NR
Dugue 2019	5606	NR	Cont	g/day in last week	cg02393640	LUZP6	7	135660101	-0.00152644	1.82e-08	NR	NR	NR
Dugue 2019	5606	NR	Cont	g/day in last week	cg02431260	ESAM	11	124628888	-0.0020162	6.16e-14	NR	NR	NR
Dugue 2019	5606	NR	Cont	g/day in last week	cg02459569	LASS2	1	150944634	-0.00122679	1.45e-11	NR	NR	NR
Dugue 2019	5606	NR	Cont	g/day in last week	cg02470690		6	27839548	-0.00160986	7.09e-08	NR	NR	NR
Dugue 2019	5606	NR	Cont	g/day in last week	cg02571142	DKK4	8	42234803	-0.00158745	1e-09	NR	NR	NR
Dugue 2019	5606	NR	Cont	g/day in last week	cg02578470	MCM2	3	127320670	-0.00167114	1.34e-18	NR	NR	NR
Dugue 2019	5606	NR	Cont	g/day in last week	cg02583484	HNRNPA1	12	54677008	-0.00206135	1.63e-29	NR	NR	NR
Dugue 2019	5606	NR	Cont	g/day in last week	cg02647520	HSD17B8	6	33173218	-0.00119114	1.5e-10	NR	NR	NR
Dugue 2019	5606	NR	Cont	g/day in last week	cg02654940	HMGA1	6	34206400	-0.00125958	4.83e-15	NR	NR	NR
Dugue 2019	5606	NR	Cont	g/day in last week	cg02661372	IER5	1	181056912	-0.00146542	8.97e-12	NR	NR	NR
Dugue 2019	5606	NR	Cont	g/day in last week	cg02711608	SLC1A5	19	47287964	-0.00257622	5.57e-30	NR	NR	NR
Dugue 2019	5606	NR	Cont	g/day in last week	cg02717339	ANKRD39	2	97524767	-0.00125927	2.73e-10	NR	NR	NR
Dugue 2019	5606	NR	Cont	g/day in last week	cg02719954		8	23830907	-0.00223487	1.56e-09	NR	NR	NR
Dugue 2019	5606	NR	Cont	g/day in last week	cg02771362	SH2D3C	9	130541859	-0.000999191	2.64e-10	NR	NR	NR
Dugue 2019	5606	NR	Cont	g/day in last week	cg02790691	DTNA	18	32289550	-0.00204036	8.76e-09	NR	NR	NR
Dugue 2019	5606	NR	Cont	g/day in last week	cg02810967	NCAPG	4	17813558	-0.00200145	4.14e-13	NR	NR	NR
Dugue 2019	5606	NR	Cont	g/day in last week	cg02812767	LOXL1	15	74218468	-0.00215264	1.22e-12	NR	NR	NR
Dugue 2019	5606	NR	Cont	g/day in last week	cg02837301	DOK2	8	21769695	-0.00113218	2.11e-09	NR	NR	NR
Dugue 2019	5606	NR	Cont	g/day in last week	cg02855207	RELT	11	73087016	-0.0012354	6.65e-08	NR	NR	NR
Dugue 2019	5606	NR	Cont	g/day in last week	cg03006527		1	155043967	-0.00120547	3.32e-11	NR	NR	NR
Dugue 2019	5606	NR	Cont	g/day in last week	cg03044533	MAML2	11	96065844	-0.0016391	4.34e-08	NR	NR	NR
Dugue 2019	5606	NR	Cont	g/day in last week	cg03044573	GAS5	1	173835265	-0.00379255	2.91e-21	NR	NR	NR
Dugue 2019	5606	NR	Cont	g/day in last week	cg03068497	GARS	7	30635838	-0.00295102	2.5e-14	NR	NR	NR
Dugue 2019	5606	NR	Cont	g/day in last week	cg03099849		19	39755959	-0.00120999	4.7e-10	NR	NR	NR
Dugue 2019	5606	NR	Cont	g/day in last week	cg03149958		6	36326677	-0.00246386	2.81e-12	NR	NR	NR
Dugue 2019	5606	NR	Cont	g/day in last week	cg03184011		20	39945503	-0.000919464	5.84e-12	NR	NR	NR
Dugue 2019	5606	NR	Cont	g/day in last week	cg03217115		2	118942841	-0.00211984	1.73e-17	NR	NR	NR
Dugue 2019	5606	NR	Cont	g/day in last week	cg03222868	KCNH3	12	49933636	-0.00125031	4.64e-09	NR	NR	NR
Dugue 2019	5606	NR	Cont	g/day in last week	cg03260624	CDC7	1	91970722	-0.00150332	5.51e-10	NR	NR	NR
Dugue 2019	5606	NR	Cont	g/day in last week	cg03285617	NT5E	6	86179345	-0.00141619	2.86e-12	NR	NR	NR
Dugue 2019	5606	NR	Cont	g/day in last week	cg03331229	MMP13	11	102821111	-0.00188761	3.25e-10	NR	NR	NR
Dugue 2019	5606	NR	Cont	g/day in last week	cg03337218	PRTFDC1	10	25189866	-0.0018834	1.14e-12	NR	NR	NR
Dugue 2019	5606	NR	Cont	g/day in last week	cg03339609	LSM14A	19	34662636	-0.00213054	3.69e-20	NR	NR	NR
Dugue 2019	5606	NR	Cont	g/day in last week	cg03375056	YTHDF2	1	29062431	-0.0015681	9.89e-09	NR	NR	NR
Dugue 2019	5606	NR	Cont	g/day in last week	cg03384000	NAGS	17	42081948	-0.00145309	2.26e-08	NR	NR	NR
Dugue 2019	5606	NR	Cont	g/day in last week	cg03391657	LOC647121	1	121260690	-0.0016172	8.73e-09	NR	NR	NR
Dugue 2019	5606	NR	Cont	g/day in last week	cg03431111	SNORD30	11	62621406	-0.00175927	1.26e-10	NR	NR	NR
Dugue 2019	5606	NR	Cont	g/day in last week	cg03450635	FAM198B	4	159094213	-0.00155888	1.45e-13	NR	NR	NR
Dugue 2019	5606	NR	Cont	g/day in last week	cg03507326	LOC100128788	16	2801952	-0.00253504	1.21e-12	NR	NR	NR
Dugue 2019	5606	NR	Cont	g/day in last week	cg03523740	TXLNA	1	32645027	-0.00133785	1.79e-20	NR	NR	NR
Dugue 2019	5606	NR	Cont	g/day in last week	cg03533472	GPT2	16	46919112	-0.00217616	1.26e-15	NR	NR	NR
Dugue 2019	5606	NR	Cont	g/day in last week	cg03539717	GADD45GIP1	19	13065086	-0.00112632	1.28e-09	NR	NR	NR
Dugue 2019	5606	NR	Cont	g/day in last week	cg03575122	UBR5	8	103407566	-0.00111004	9.76e-08	NR	NR	NR
Dugue 2019	5606	NR	Cont	g/day in last week	cg03599037	C10orf58	10	82172508	-0.000968982	3.04e-14	NR	NR	NR
Dugue 2019	5606	NR	Cont	g/day in last week	cg03603381	RASGRP1	15	38857474	-0.00102006	3.93e-10	NR	NR	NR
Dugue 2019	5606	NR	Cont	g/day in last week	cg03606511	BCL11A	2	60735530	-0.00112442	6.9e-10	NR	NR	NR
Dugue 2019	5606	NR	Cont	g/day in last week	cg03607573	TAF1D	11	93471889	-0.00206472	1.97e-21	NR	NR	NR
Dugue 2019	5606	NR	Cont	g/day in last week	cg03609488	ETV6	12	12044761	-0.00141132	1.83e-09	NR	NR	NR
Dugue 2019	5606	NR	Cont	g/day in last week	cg03627290	PNKD	2	219155248	-0.000836824	3.09e-09	NR	NR	NR
Dugue 2019	5606	NR	Cont	g/day in last week	cg03652525		3	72149324	-0.00142044	5.03e-12	NR	NR	NR
Dugue 2019	5606	NR	Cont	g/day in last week	cg03700669	SMPDL3B	1	28284100	-0.00104669	1.59e-08	NR	NR	NR
Dugue 2019	5606	NR	Cont	g/day in last week	cg03725309	SARS	1	109757585	-0.00234795	1.72e-17	NR	NR	NR
Dugue 2019	5606	NR	Cont	g/day in last week	cg03732014	BACH1	21	30676184	-0.00137121	3.51e-13	NR	NR	NR
Dugue 2019	5606	NR	Cont	g/day in last week	cg03740612	C2orf34	2	44659228	-0.0020771	5.31e-08	NR	NR	NR
Dugue 2019	5606	NR	Cont	g/day in last week	cg03756485	GNPTAB	12	102218837	-0.00119171	6.95e-08	NR	NR	NR
Dugue 2019	5606	NR	Cont	g/day in last week	cg03805684	FEN1	11	61561219	-0.00143089	4.97e-09	NR	NR	NR
Dugue 2019	5606	NR	Cont	g/day in last week	cg03845837	HSF4	16	67203406	-0.00191207	6.27e-14	NR	NR	NR
Dugue 2019	5606	NR	Cont	g/day in last week	cg03935116	FAM60A	12	31476565	-0.00175475	5.82e-14	NR	NR	NR
Dugue 2019	5606	NR	Cont	g/day in last week	cg03967798		4	145268453	-0.00132096	2.27e-08	NR	NR	NR
Dugue 2019	5606	NR	Cont	g/day in last week	cg03997643	RNU6ATAC	9	137030726	-0.00120217	3.42e-08	NR	NR	NR
Dugue 2019	5606	NR	Cont	g/day in last week	cg04010868	ZC3H7A	16	11876381	-0.000991269	1.63e-08	NR	NR	NR
Dugue 2019	5606	NR	Cont	g/day in last week	cg04091927		8	141519270	-0.00125199	6.21e-09	NR	NR	NR
Dugue 2019	5606	NR	Cont	g/day in last week	cg04118190	DUSP2	2	96812528	-0.0012392	1.45e-12	NR	NR	NR
Dugue 2019	5606	NR	Cont	g/day in last week	cg04162032	LOC646627	1	248902767	-0.00113605	1.69e-10	NR	NR	NR
Dugue 2019	5606	NR	Cont	g/day in last week	cg27097923	TPBG	6	83071433	-0.00147008	9.97e-08	NR	NR	NR
Dugue 2019	5606	NR	Cont	g/day in last week	cg24162603	EEFSEC	3	127945858	-0.000970229	9.94e-08	NR	NR	NR
Dugue 2019	5606	NR	Cont	g/day in last week	cg27437304	APLP2	11	129992368	-0.0012959	9.93e-08	NR	NR	NR
Dugue 2019	5606	NR	Cont	g/day in last week	cg05720226	ST7	7	116786597	-0.00113915	9.92e-08	NR	NR	NR
Dugue 2019	5606	NR	Cont	g/day in last week	cg25944717	TRIM41	5	180648843	-0.00174807	9.91e-08	NR	NR	NR
Dugue 2019	5606	NR	Cont	g/day in last week	cg00245854	DCTN4	5	150138895	-0.00137541	9.88e-08	NR	NR	NR
Dugue 2019	5606	NR	Cont	g/day in last week	cg11755251	MIR557	1	168343945	-0.00140376	9.85e-08	NR	NR	NR
Dugue 2019	5606	NR	Cont	g/day in last week	cg04172771	SNTG1	8	50892702	-0.00193395	1.32e-11	NR	NR	NR
Dugue 2019	5606	NR	Cont	g/day in last week	cg08472449	TANC1	2	160009677	-0.00181866	9.76e-08	NR	NR	NR
Dugue 2019	5606	NR	Cont	g/day in last week	cg26691179	WWOX	16	78211809	-0.00166904	9.73e-08	NR	NR	NR
Dugue 2019	5606	NR	Cont	g/day in last week	cg20362308	FAM18B2	17	15412141	-0.00122974	9.58e-08	NR	NR	NR
Dugue 2019	5606	NR	Cont	g/day in last week	cg09387382		17	78418426	-0.00124698	9.51e-08	NR	NR	NR
Dugue 2019	5606	NR	Cont	g/day in last week	cg01753375	DCTN1	2	74607600	-0.000850388	9.45e-08	NR	NR	NR
Dugue 2019	5606	NR	Cont	g/day in last week	cg09391066		6	3163814	-0.00157282	9.37e-08	NR	NR	NR
Dugue 2019	5606	NR	Cont	g/day in last week	cg04191300	KCNJ1	11	128729652	-0.00226166	5.34e-13	NR	NR	NR
Dugue 2019	5606	NR	Cont	g/day in last week	cg16331883	MAP3K12	12	53886170	-0.0017139	9.27e-08	NR	NR	NR
Dugue 2019	5606	NR	Cont	g/day in last week	cg21721340	SOX18	20	62682309	-0.00119589	9.27e-08	NR	NR	NR
Dugue 2019	5606	NR	Cont	g/day in last week	cg18262201	PFKFB3	10	6187854	-0.00138364	9.26e-08	NR	NR	NR
Dugue 2019	5606	NR	Cont	g/day in last week	cg26165081	PSMA1	11	14562955	-0.00125262	9.2e-08	NR	NR	NR
Dugue 2019	5606	NR	Cont	g/day in last week	cg19009305	ISG20	15	89181732	-0.00090132	9.19e-08	NR	NR	NR
Dugue 2019	5606	NR	Cont	g/day in last week	cg09452027	SLC35C1	11	45825483	-0.00120273	9.19e-08	NR	NR	NR
Dugue 2019	5606	NR	Cont	g/day in last week	cg22670033		5	180646608	-0.00197703	9.18e-08	NR	NR	NR
Dugue 2019	5606	NR	Cont	g/day in last week	cg14397813	GNAQ	9	80522508	-0.00137484	9.13e-08	NR	NR	NR
Dugue 2019	5606	NR	Cont	g/day in last week	cg13962372	CDC42	1	22415149	-0.001251	9.08e-08	NR	NR	NR
Dugue 2019	5606	NR	Cont	g/day in last week	cg15718594	BATF3	1	212874742	-0.00104995	9.01e-08	NR	NR	NR
Dugue 2019	5606	NR	Cont	g/day in last week	cg15611912	RGS10	10	121300857	-0.00152735	8.99e-08	NR	NR	NR
Dugue 2019	5606	NR	Cont	g/day in last week	cg00377681		6	37102603	-0.000868182	8.95e-08	NR	NR	NR
Dugue 2019	5606	NR	Cont	g/day in last week	cg10593047		2	232526667	-0.00168534	8.95e-08	NR	NR	NR
Dugue 2019	5606	NR	Cont	g/day in last week	cg27025995	COL22A1	8	139926236	-0.00164554	8.93e-08	NR	NR	NR
Dugue 2019	5606	NR	Cont	g/day in last week	cg09440270	CYP26C1	10	94820086	-0.00106966	8.74e-08	NR	NR	NR
Dugue 2019	5606	NR	Cont	g/day in last week	cg13933070		9	93925376	-0.00128826	8.73e-08	NR	NR	NR
Dugue 2019	5606	NR	Cont	g/day in last week	cg04240553	TRADD	16	67188614	-0.00133321	8.93e-09	NR	NR	NR
Dugue 2019	5606	NR	Cont	g/day in last week	cg14975122	HDAC1	1	32761824	-0.0010281	8.66e-08	NR	NR	NR
Dugue 2019	5606	NR	Cont	g/day in last week	cg13039199	SLCO3A1	15	92455658	-0.000856184	8.66e-08	NR	NR	NR
Dugue 2019	5606	NR	Cont	g/day in last week	cg12018969		2	43350413	-0.00122123	8.65e-08	NR	NR	NR
Dugue 2019	5606	NR	Cont	g/day in last week	cg04261072	RBM26	13	79977499	-0.0019348	2.33e-18	NR	NR	NR
Dugue 2019	5606	NR	Cont	g/day in last week	cg13139542		2	8242815	-0.00141591	8.62e-08	NR	NR	NR
Dugue 2019	5606	NR	Cont	g/day in last week	cg17753789	ZMIZ1	10	81026766	-0.000888911	8.54e-08	NR	NR	NR
Dugue 2019	5606	NR	Cont	g/day in last week	cg07757252	TWF2	3	52274561	-0.000984519	8.51e-08	NR	NR	NR
Dugue 2019	5606	NR	Cont	g/day in last week	cg01252496	USE1	19	17326655	-0.000800307	8.42e-08	NR	NR	NR
Dugue 2019	5606	NR	Cont	g/day in last week	cg24675730	GMEB1	1	28994850	-0.00120645	8.41e-08	NR	NR	NR
Dugue 2019	5606	NR	Cont	g/day in last week	cg04295144	ICAM5	19	10407184	-0.00242605	4.27e-09	NR	NR	NR
Dugue 2019	5606	NR	Cont	g/day in last week	cg13168012	TMEM132A	11	60692978	-0.000766099	8.26e-08	NR	NR	NR
Dugue 2019	5606	NR	Cont	g/day in last week	cg12244275		2	70355397	-0.00142889	8.24e-08	NR	NR	NR
Dugue 2019	5606	NR	Cont	g/day in last week	cg08608952	CDC42	1	22383198	-0.0016018	8.22e-08	NR	NR	NR
Dugue 2019	5606	NR	Cont	g/day in last week	cg23213327	RSAD2	2	7016509	-0.00123878	8.22e-08	NR	NR	NR
Dugue 2019	5606	NR	Cont	g/day in last week	cg18028470	PIGV	1	27117061	-0.0012756	8.21e-08	NR	NR	NR
Dugue 2019	5606	NR	Cont	g/day in last week	cg13392022	ADAR	1	154600693	-0.00179951	8.16e-08	NR	NR	NR
Dugue 2019	5606	NR	Cont	g/day in last week	cg04367503	NFIX	19	13121571	-0.0036665	5.62e-19	NR	NR	NR
Dugue 2019	5606	NR	Cont	g/day in last week	cg05155595	ANXA4	2	70008161	-0.00135612	8.09e-08	NR	NR	NR
Dugue 2019	5606	NR	Cont	g/day in last week	cg24139720	MDM4	1	204485075	-0.00120222	8.07e-08	NR	NR	NR
Dugue 2019	5606	NR	Cont	g/day in last week	cg02210498	CRKL	22	21275401	-0.00153644	8.03e-08	NR	NR	NR
Dugue 2019	5606	NR	Cont	g/day in last week	cg12655416	ORMDL3	17	38077870	-0.00101451	8.03e-08	NR	NR	NR
Dugue 2019	5606	NR	Cont	g/day in last week	cg18302606	PLEKHG2	19	39904402	-0.00231956	8.01e-08	NR	NR	NR
Dugue 2019	5606	NR	Cont	g/day in last week	cg12030710	CHST12	7	2444010	-0.00184556	7.93e-08	NR	NR	NR
Dugue 2019	5606	NR	Cont	g/day in last week	cg09666532	B4GALT2	1	44446600	-0.000829664	7.9e-08	NR	NR	NR
Dugue 2019	5606	NR	Cont	g/day in last week	cg20959965		X	37606012	-0.0013978	7.71e-08	NR	NR	NR
Dugue 2019	5606	NR	Cont	g/day in last week	cg04370442	TEPP	16	58019866	-0.00452715	1.28e-11	NR	NR	NR
Dugue 2019	5606	NR	Cont	g/day in last week	cg18090646		2	7575450	-0.0014679	7.63e-08	NR	NR	NR
Dugue 2019	5606	NR	Cont	g/day in last week	cg02072975	BEST4	1	45249541	-0.0010867	7.54e-08	NR	NR	NR
Dugue 2019	5606	NR	Cont	g/day in last week	cg05989693	RASSF1	3	50376155	-0.000672649	7.47e-08	NR	NR	NR
Dugue 2019	5606	NR	Cont	g/day in last week	cg10336193		1	206848389	-0.00110522	7.45e-08	NR	NR	NR
Dugue 2019	5606	NR	Cont	g/day in last week	cg04383058	PITPNM1	11	67273507	-0.00156962	2.87e-17	NR	NR	NR
Dugue 2019	5606	NR	Cont	g/day in last week	cg16724148	AGL	1	100326338	-0.00171513	7.3e-08	NR	NR	NR
Dugue 2019	5606	NR	Cont	g/day in last week	cg18418479	MINK1	17	4735500	-0.000691071	7.26e-08	NR	NR	NR
Dugue 2019	5606	NR	Cont	g/day in last week	cg17980786	TRIM71	3	32933637	-0.000825334	7.26e-08	NR	NR	NR
Dugue 2019	5606	NR	Cont	g/day in last week	cg22090404	RNASEH2B	13	51489972	-0.00136038	7.23e-08	NR	NR	NR
Dugue 2019	5606	NR	Cont	g/day in last week	cg06951627		6	26196580	-0.00162096	7.22e-08	NR	NR	NR
Dugue 2019	5606	NR	Cont	g/day in last week	cg14387743	VNN3	6	133056278	-0.00153807	7.22e-08	NR	NR	NR
Dugue 2019	5606	NR	Cont	g/day in last week	cg08255475	CDT1	16	88871329	-0.00161309	7.2e-08	NR	NR	NR
Dugue 2019	5606	NR	Cont	g/day in last week	cg02619834	ADD3	10	111782464	-0.00181287	7.18e-08	NR	NR	NR
Dugue 2019	5606	NR	Cont	g/day in last week	cg15931839	TRAF3IP2	6	111880530	-0.00126744	7.08e-08	NR	NR	NR
Dugue 2019	5606	NR	Cont	g/day in last week	cg06722121	OTOP3	17	72934409	-0.00120254	7.08e-08	NR	NR	NR
Dugue 2019	5606	NR	Cont	g/day in last week	cg04418434	RREB1	6	7110773	-0.00132025	7.74e-09	NR	NR	NR
Dugue 2019	5606	NR	Cont	g/day in last week	cg00541500	LOC100133308	10	45642600	-0.000989392	7.01e-08	NR	NR	NR
Dugue 2019	5606	NR	Cont	g/day in last week	cg07808761	ZNF790	19	37329760	-0.00173335	6.99e-08	NR	NR	NR
Dugue 2019	5606	NR	Cont	g/day in last week	cg13094752	MMP14	14	23305548	-0.000758536	6.98e-08	NR	NR	NR
Dugue 2019	5606	NR	Cont	g/day in last week	cg04388657	RPL35	9	127623377	-0.00168787	6.9e-08	NR	NR	NR
Dugue 2019	5606	NR	Cont	g/day in last week	cg00842095	KIAA0247	14	70116951	-0.00156667	6.86e-08	NR	NR	NR
Dugue 2019	5606	NR	Cont	g/day in last week	cg10703453	SNORA38	6	31589789	-0.00157516	6.85e-08	NR	NR	NR
Dugue 2019	5606	NR	Cont	g/day in last week	cg20306694	BIN2	12	51718251	-0.00145642	6.85e-08	NR	NR	NR
Dugue 2019	5606	NR	Cont	g/day in last week	cg22885332	CXXC5	5	139034002	-0.00119273	6.72e-08	NR	NR	NR
Dugue 2019	5606	NR	Cont	g/day in last week	cg26143577	TSPYL3	20	30778628	-0.00132129	6.62e-08	NR	NR	NR
Dugue 2019	5606	NR	Cont	g/day in last week	cg11854073	SLC9A10	3	112013357	-0.00171917	6.61e-08	NR	NR	NR
Dugue 2019	5606	NR	Cont	g/day in last week	cg16296417	NSMCE2	8	126285443	-0.0016772	6.57e-08	NR	NR	NR
Dugue 2019	5606	NR	Cont	g/day in last week	cg19939793		5	151119245	-0.00126326	6.53e-08	NR	NR	NR
Dugue 2019	5606	NR	Cont	g/day in last week	cg04427651	ZDHHC18	1	27152694	-0.00123215	4.44e-10	NR	NR	NR
Dugue 2019	5606	NR	Cont	g/day in last week	cg22363327	SFRS13B	6	89828097	-0.000692675	6.49e-08	NR	NR	NR
Dugue 2019	5606	NR	Cont	g/day in last week	cg14215711	PIP4K2A	10	22894054	-0.00117399	6.47e-08	NR	NR	NR
Dugue 2019	5606	NR	Cont	g/day in last week	cg22094045	C20orf123	20	45174465	-0.00112128	6.33e-08	NR	NR	NR
Dugue 2019	5606	NR	Cont	g/day in last week	cg06243458	BANF2	20	17679422	-0.00127238	6.21e-08	NR	NR	NR
Dugue 2019	5606	NR	Cont	g/day in last week	cg04439252	STAT3	17	40475282	-0.000787079	2.43e-08	NR	NR	NR
Dugue 2019	5606	NR	Cont	g/day in last week	cg24413918	ZNF606	19	58516100	-0.00173205	6.04e-08	NR	NR	NR
Dugue 2019	5606	NR	Cont	g/day in last week	cg16062877	KSR1	17	25798415	-0.000840142	6.02e-08	NR	NR	NR
Dugue 2019	5606	NR	Cont	g/day in last week	cg03172991	NFIX	19	13105728	-0.00053743	5.95e-08	NR	NR	NR
Dugue 2019	5606	NR	Cont	g/day in last week	cg04453050	GRM2	3	51740896	-0.00122442	6.06e-08	NR	NR	NR
Dugue 2019	5606	NR	Cont	g/day in last week	cg22753630		10	63527012	-0.0010361	5.91e-08	NR	NR	NR
Dugue 2019	5606	NR	Cont	g/day in last week	cg25875537		8	21909033	-0.000871038	5.9e-08	NR	NR	NR
Dugue 2019	5606	NR	Cont	g/day in last week	cg06305891		3	195897904	-0.00105445	5.89e-08	NR	NR	NR
Dugue 2019	5606	NR	Cont	g/day in last week	cg07209244	NEURL1B	5	172116212	-0.00109583	5.88e-08	NR	NR	NR
Dugue 2019	5606	NR	Cont	g/day in last week	cg17396222		7	134228596	-0.000892572	5.84e-08	NR	NR	NR
Dugue 2019	5606	NR	Cont	g/day in last week	cg05906166	KLF2	19	16437057	-0.00230338	5.82e-08	NR	NR	NR
Dugue 2019	5606	NR	Cont	g/day in last week	cg25793587	SMAD3	15	67383147	-0.00162816	5.75e-08	NR	NR	NR
Dugue 2019	5606	NR	Cont	g/day in last week	cg02247863		22	50983415	-0.00110171	5.75e-08	NR	NR	NR
Dugue 2019	5606	NR	Cont	g/day in last week	cg24361265	ELL3	15	44068668	-0.00261348	5.75e-08	NR	NR	NR
Dugue 2019	5606	NR	Cont	g/day in last week	cg20770512	GFOD1	6	13396094	-0.000956858	5.74e-08	NR	NR	NR
Dugue 2019	5606	NR	Cont	g/day in last week	cg05995607		11	59953045	-0.00105176	5.72e-08	NR	NR	NR
Dugue 2019	5606	NR	Cont	g/day in last week	cg01792666	SRCAP	16	30710912	-0.00116215	5.72e-08	NR	NR	NR
Dugue 2019	5606	NR	Cont	g/day in last week	cg03573109		16	85849619	-0.000926458	5.71e-08	NR	NR	NR
Dugue 2019	5606	NR	Cont	g/day in last week	cg04453471	MAP3K8	10	30726531	-0.00153214	1.38e-09	NR	NR	NR
Dugue 2019	5606	NR	Cont	g/day in last week	cg00582562	SKAP1	17	46388465	-0.00207458	5.66e-08	NR	NR	NR
Dugue 2019	5606	NR	Cont	g/day in last week	cg16896205	CD53	1	111413643	-0.00137972	5.64e-08	NR	NR	NR
Dugue 2019	5606	NR	Cont	g/day in last week	cg00103299		15	93362247	-0.00103199	5.6e-08	NR	NR	NR
Dugue 2019	5606	NR	Cont	g/day in last week	cg23403099	TMEM132E	17	32942254	-0.00110279	5.6e-08	NR	NR	NR
Dugue 2019	5606	NR	Cont	g/day in last week	cg16932560	SNORA38	6	31589994	-0.00119548	5.6e-08	NR	NR	NR
Dugue 2019	5606	NR	Cont	g/day in last week	cg26204079	DGKD	2	234262348	-0.00151901	5.59e-08	NR	NR	NR
Dugue 2019	5606	NR	Cont	g/day in last week	cg16302310	TLR9	3	52260432	-0.000626847	5.58e-08	NR	NR	NR
Dugue 2019	5606	NR	Cont	g/day in last week	cg05376869	NCRNA00188	17	16344368	-0.00159503	5.51e-08	NR	NR	NR
Dugue 2019	5606	NR	Cont	g/day in last week	cg09694527	RILPL2	12	123918498	-0.00146563	5.48e-08	NR	NR	NR
Dugue 2019	5606	NR	Cont	g/day in last week	cg12430029	MSI2	17	55446979	-0.00112682	5.43e-08	NR	NR	NR
Dugue 2019	5606	NR	Cont	g/day in last week	cg23095192	ZEB2	2	145271307	-0.00107142	5.43e-08	NR	NR	NR
Dugue 2019	5606	NR	Cont	g/day in last week	cg20822884	BEND5	1	49240625	-0.00117133	5.39e-08	NR	NR	NR
Dugue 2019	5606	NR	Cont	g/day in last week	cg09527687	TMEM154	4	153549242	-0.00121564	5.38e-08	NR	NR	NR
Dugue 2019	5606	NR	Cont	g/day in last week	cg26283141	VPS52	6	33240471	-0.00119758	5.38e-08	NR	NR	NR
Dugue 2019	5606	NR	Cont	g/day in last week	cg16854826	ZMIZ1	10	80889523	-0.000815857	5.34e-08	NR	NR	NR
Dugue 2019	5606	NR	Cont	g/day in last week	cg04460609	LDB2	4	16532808	-0.00216281	3.11e-19	NR	NR	NR
Dugue 2019	5606	NR	Cont	g/day in last week	cg11415275	CHD1L	1	146715872	-0.0013988	5.23e-08	NR	NR	NR
Dugue 2019	5606	NR	Cont	g/day in last week	cg01621943		17	53531409	-0.00117859	5.2e-08	NR	NR	NR
Dugue 2019	5606	NR	Cont	g/day in last week	cg04661436	MORF4L1	15	79169207	-0.00136203	5.19e-08	NR	NR	NR
Dugue 2019	5606	NR	Cont	g/day in last week	cg05343021	ILF3	19	10773698	-0.000739507	5.16e-08	NR	NR	NR
Dugue 2019	5606	NR	Cont	g/day in last week	cg20017995	SNORD24	9	136216076	-0.00114527	5.15e-08	NR	NR	NR
Dugue 2019	5606	NR	Cont	g/day in last week	cg00197026	TMEM170B	6	11537105	-0.00172934	5.14e-08	NR	NR	NR
Dugue 2019	5606	NR	Cont	g/day in last week	cg03584056	UHRF1	19	4910798	-0.000753414	5.12e-08	NR	NR	NR
Dugue 2019	5606	NR	Cont	g/day in last week	cg04517079	FOXP4	6	41546161	-0.00101501	5.11e-08	NR	NR	NR
Dugue 2019	5606	NR	Cont	g/day in last week	cg04464122		11	34457835	-0.00143944	7.8e-09	NR	NR	NR
Dugue 2019	5606	NR	Cont	g/day in last week	cg06318624		2	174913188	-0.00121007	5.04e-08	NR	NR	NR
Dugue 2019	5606	NR	Cont	g/day in last week	cg09650731		16	46823623	-0.00090745	5.01e-08	NR	NR	NR
Dugue 2019	5606	NR	Cont	g/day in last week	cg06829584		10	75659483	-0.00086395	4.99e-08	NR	NR	NR
Dugue 2019	5606	NR	Cont	g/day in last week	cg04731624		5	171067585	-0.00136746	4.98e-08	NR	NR	NR
Dugue 2019	5606	NR	Cont	g/day in last week	cg27516159	CACNA2D4	12	1904847	-0.00114096	4.86e-08	NR	NR	NR
Dugue 2019	5606	NR	Cont	g/day in last week	cg05971148	ACTB	7	5568411	-0.00135567	4.8e-08	NR	NR	NR
Dugue 2019	5606	NR	Cont	g/day in last week	cg13795883	ABCA2	9	139902728	-0.000845412	4.7e-08	NR	NR	NR
Dugue 2019	5606	NR	Cont	g/day in last week	cg04913005	FZD7	2	202900408	-0.00119325	4.69e-08	NR	NR	NR
Dugue 2019	5606	NR	Cont	g/day in last week	cg19978242	INPP5F	10	121578846	-0.00158432	4.68e-08	NR	NR	NR
Dugue 2019	5606	NR	Cont	g/day in last week	cg03024791		11	2243261	-0.00116395	4.68e-08	NR	NR	NR
Dugue 2019	5606	NR	Cont	g/day in last week	cg13928306	ZNF205	16	3162397	-0.00156399	4.67e-08	NR	NR	NR
Dugue 2019	5606	NR	Cont	g/day in last week	cg23264429	STAMBPL1	10	90642003	-0.00170228	4.63e-08	NR	NR	NR
Dugue 2019	5606	NR	Cont	g/day in last week	cg04561005	KSR1	17	25872931	-0.00140413	1.76e-12	NR	NR	NR
Dugue 2019	5606	NR	Cont	g/day in last week	cg10805721	TPBG	6	83075187	-0.00232553	4.62e-08	NR	NR	NR
Dugue 2019	5606	NR	Cont	g/day in last week	cg13026729	EZR	6	159240774	-0.000957376	4.62e-08	NR	NR	NR
Dugue 2019	5606	NR	Cont	g/day in last week	cg25344672	C9orf171	9	135285207	-0.0013773	4.56e-08	NR	NR	NR
Dugue 2019	5606	NR	Cont	g/day in last week	cg01054402	TGOLN2	2	85551850	-0.00157	4.54e-08	NR	NR	NR
Dugue 2019	5606	NR	Cont	g/day in last week	cg09357462	DUSP5	10	112259305	-0.00137397	4.43e-08	NR	NR	NR
Dugue 2019	5606	NR	Cont	g/day in last week	cg01152015	IGSF9B	11	133820837	-0.000955754	4.41e-08	NR	NR	NR
Dugue 2019	5606	NR	Cont	g/day in last week	cg20497631	MFHAS1	8	8647440	-0.00122528	4.34e-08	NR	NR	NR
Dugue 2019	5606	NR	Cont	g/day in last week	cg04577162	RFC2	7	73667397	-0.00176679	2.18e-14	NR	NR	NR
Dugue 2019	5606	NR	Cont	g/day in last week	cg10575367	LOC100128788	16	2801914	-0.00157811	4.34e-08	NR	NR	NR
Dugue 2019	5606	NR	Cont	g/day in last week	cg09703123	NRM	6	30658281	-0.00129154	4.31e-08	NR	NR	NR
Dugue 2019	5606	NR	Cont	g/day in last week	cg12753787	PRDM16	1	3239712	-0.000976852	4.31e-08	NR	NR	NR
Dugue 2019	5606	NR	Cont	g/day in last week	cg06788278	RALGPS2	1	178693891	-0.00104633	4.31e-08	NR	NR	NR
Dugue 2019	5606	NR	Cont	g/day in last week	cg19030554	NME3	16	1822289	-0.0017215	4.29e-08	NR	NR	NR
Dugue 2019	5606	NR	Cont	g/day in last week	cg26408612	BAT1	6	31507879	-0.00137357	4.27e-08	NR	NR	NR
Dugue 2019	5606	NR	Cont	g/day in last week	cg09986680		19	39737861	-0.00139109	4.22e-08	NR	NR	NR
Dugue 2019	5606	NR	Cont	g/day in last week	cg08731696		1	59280489	-0.00251128	4.16e-08	NR	NR	NR
Dugue 2019	5606	NR	Cont	g/day in last week	cg04230060	SUSD1	9	114937992	-0.00187819	4.09e-08	NR	NR	NR
Dugue 2019	5606	NR	Cont	g/day in last week	cg25741368	LIPE	19	42906601	-0.000795141	4.08e-08	NR	NR	NR
Dugue 2019	5606	NR	Cont	g/day in last week	cg21695395	ETS1	11	128364143	-0.00126168	4.06e-08	NR	NR	NR
Dugue 2019	5606	NR	Cont	g/day in last week	cg26487157	PCBP1	2	70313295	-0.00316599	4.06e-08	NR	NR	NR
Dugue 2019	5606	NR	Cont	g/day in last week	cg10902738		8	134895500	-0.00136045	4.01e-08	NR	NR	NR
Dugue 2019	5606	NR	Cont	g/day in last week	cg27046604	SPINT1	15	41135869	-0.000886021	3.97e-08	NR	NR	NR
Dugue 2019	5606	NR	Cont	g/day in last week	cg04625615	ITPKA	15	41788368	-0.0015509	3.97e-08	NR	NR	NR
Dugue 2019	5606	NR	Cont	g/day in last week	cg16943019	RYK	3	133956516	-0.00129914	3.96e-08	NR	NR	NR
Dugue 2019	5606	NR	Cont	g/day in last week	cg21160357	TNS3	7	47522272	-0.00125869	3.9e-08	NR	NR	NR
Dugue 2019	5606	NR	Cont	g/day in last week	cg23106115	C8orf38	8	96036568	-0.00100738	3.9e-08	NR	NR	NR
Dugue 2019	5606	NR	Cont	g/day in last week	cg03332546	EPS15L1	19	16553887	-0.00148901	3.79e-08	NR	NR	NR
Dugue 2019	5606	NR	Cont	g/day in last week	cg01375248	SR140	3	142724451	-0.00133336	3.76e-08	NR	NR	NR
Dugue 2019	5606	NR	Cont	g/day in last week	cg02623114	PLEC1	8	145015122	-0.000753186	3.73e-08	NR	NR	NR
Dugue 2019	5606	NR	Cont	g/day in last week	cg07530947	COG3	13	46041747	-0.00121568	3.72e-08	NR	NR	NR
Dugue 2019	5606	NR	Cont	g/day in last week	cg01272428	SLC4A5	2	74477456	-0.00159746	3.72e-08	NR	NR	NR
Dugue 2019	5606	NR	Cont	g/day in last week	cg02054431	SNORA38	6	31589593	-0.00154115	3.71e-08	NR	NR	NR
Dugue 2019	5606	NR	Cont	g/day in last week	cg22926842	CENPM	22	42336869	-0.00088475	3.66e-08	NR	NR	NR
Dugue 2019	5606	NR	Cont	g/day in last week	cg04605617	PLA2G2C	1	20501558	-0.00201878	9.6e-09	NR	NR	NR
Dugue 2019	5606	NR	Cont	g/day in last week	cg07453451	JAK1	1	65433360	-0.00219487	3.65e-08	NR	NR	NR
Dugue 2019	5606	NR	Cont	g/day in last week	cg11630392	GPR171	3	150920964	-0.00186548	3.62e-08	NR	NR	NR
Dugue 2019	5606	NR	Cont	g/day in last week	cg08305533	SFI1	22	32007224	0.00117601	3.59e-08	NR	NR	NR
Dugue 2019	5606	NR	Cont	g/day in last week	cg04610235	MTMR4	17	56592440	-0.00100814	1.78e-08	NR	NR	NR
Dugue 2019	5606	NR	Cont	g/day in last week	cg23120725	TRPM7	15	50975608	-0.0012076	3.53e-08	NR	NR	NR
Dugue 2019	5606	NR	Cont	g/day in last week	cg21960364		4	185398007	-0.00132292	3.52e-08	NR	NR	NR
Dugue 2019	5606	NR	Cont	g/day in last week	cg13619623	BBS9	7	33637324	-0.00180377	3.44e-08	NR	NR	NR
Dugue 2019	5606	NR	Cont	g/day in last week	cg04622454	NELF	9	140349128	-0.00104978	1.57e-11	NR	NR	NR
Dugue 2019	5606	NR	Cont	g/day in last week	cg03725115	HLA-E	6	30458102	-0.00206829	3.39e-08	NR	NR	NR
Dugue 2019	5606	NR	Cont	g/day in last week	cg27146050	HIF3A	19	46801557	-0.00123423	3.34e-08	NR	NR	NR
Dugue 2019	5606	NR	Cont	g/day in last week	cg13795831	CTSZ	20	57582706	-0.00126838	3.33e-08	NR	NR	NR
Dugue 2019	5606	NR	Cont	g/day in last week	cg22874264	SH2D4B	10	82296440	-0.000749356	3.27e-08	NR	NR	NR
Dugue 2019	5606	NR	Cont	g/day in last week	cg05975881		16	3148982	-0.00156512	3.27e-08	NR	NR	NR
Dugue 2019	5606	NR	Cont	g/day in last week	cg15763258	FLI1	11	128561675	-0.00131875	3.26e-08	NR	NR	NR
Dugue 2019	5606	NR	Cont	g/day in last week	cg18241337	SSR3	3	156271892	-0.0012254	3.26e-08	NR	NR	NR
Dugue 2019	5606	NR	Cont	g/day in last week	cg01941278		5	71895997	-0.00149624	3.25e-08	NR	NR	NR
Dugue 2019	5606	NR	Cont	g/day in last week	cg00937359	SYNCRIP	6	86350540	-0.00101779	3.24e-08	NR	NR	NR
Dugue 2019	5606	NR	Cont	g/day in last week	cg25492583		17	53923046	-0.000948469	3.16e-08	NR	NR	NR
Dugue 2019	5606	NR	Cont	g/day in last week	cg18533225	KLHDC7B	22	50986813	-0.00123191	3.15e-08	NR	NR	NR
Dugue 2019	5606	NR	Cont	g/day in last week	cg04665046		9	123691674	-0.00164697	5.86e-10	NR	NR	NR
Dugue 2019	5606	NR	Cont	g/day in last week	cg24124954	BAT1	6	31508106	-0.00169519	3.14e-08	NR	NR	NR
Dugue 2019	5606	NR	Cont	g/day in last week	cg03676485	LFNG	7	2563816	-0.0013913	3.11e-08	NR	NR	NR
Dugue 2019	5606	NR	Cont	g/day in last week	cg04689048	PNMAL2	19	46999289	-0.00131492	2.12e-08	NR	NR	NR
Dugue 2019	5606	NR	Cont	g/day in last week	cg07974833	ADAMTS3	4	73430160	-0.00162279	3.11e-08	NR	NR	NR
Dugue 2019	5606	NR	Cont	g/day in last week	cg00701706	OTOP3	17	72931632	-0.0015566	3.08e-08	NR	NR	NR
Dugue 2019	5606	NR	Cont	g/day in last week	cg04730047	TBC1D23	3	99979355	-0.00140886	5.98e-08	NR	NR	NR
Dugue 2019	5606	NR	Cont	g/day in last week	cg01036779	SH2D3A	19	6768251	-0.00112075	3.06e-08	NR	NR	NR
Dugue 2019	5606	NR	Cont	g/day in last week	cg16428517		16	3317428	-0.00206731	3.04e-08	NR	NR	NR
Dugue 2019	5606	NR	Cont	g/day in last week	cg14545975	RXRA	9	137297213	-0.00101547	2.98e-08	NR	NR	NR
Dugue 2019	5606	NR	Cont	g/day in last week	cg27315497	SLC43A1	11	57281561	-0.00105426	2.97e-08	NR	NR	NR
Dugue 2019	5606	NR	Cont	g/day in last week	cg02007567	FAM18A	16	10912696	-0.00111164	2.95e-08	NR	NR	NR
Dugue 2019	5606	NR	Cont	g/day in last week	cg18728264	CXCR5	11	118766491	-0.000960958	2.94e-08	NR	NR	NR
Dugue 2019	5606	NR	Cont	g/day in last week	cg15958828	FOXP1	3	71598380	-0.00118936	2.92e-08	NR	NR	NR
Dugue 2019	5606	NR	Cont	g/day in last week	cg00456672	C2CD4A	15	62358751	-0.0016184	2.91e-08	NR	NR	NR
Dugue 2019	5606	NR	Cont	g/day in last week	cg03084350	PLCD1	3	38065265	-0.000652544	2.91e-08	NR	NR	NR
Dugue 2019	5606	NR	Cont	g/day in last week	cg25567938	CFLAR	2	201993795	-0.00122274	2.89e-08	NR	NR	NR
Dugue 2019	5606	NR	Cont	g/day in last week	cg22479226	LARP1	5	154153028	-0.00098841	2.87e-08	NR	NR	NR
Dugue 2019	5606	NR	Cont	g/day in last week	cg13880654	KDM4C	9	6779450	-0.00146712	2.84e-08	NR	NR	NR
Dugue 2019	5606	NR	Cont	g/day in last week	cg11903133	ZFP64	20	50722613	-0.00177783	2.84e-08	NR	NR	NR
Dugue 2019	5606	NR	Cont	g/day in last week	cg22523743	ZNF718	4	53115	-0.000628824	2.82e-08	NR	NR	NR
Dugue 2019	5606	NR	Cont	g/day in last week	cg12743031	PTK2B	8	27219512	-0.00103922	2.8e-08	NR	NR	NR
Dugue 2019	5606	NR	Cont	g/day in last week	cg06834916		5	95610	-0.00166211	2.79e-08	NR	NR	NR
Dugue 2019	5606	NR	Cont	g/day in last week	cg12067024	S100A7A	1	153387689	-0.000860224	2.79e-08	NR	NR	NR
Dugue 2019	5606	NR	Cont	g/day in last week	cg07188665	HSF4	16	67200492	-0.00114148	2.79e-08	NR	NR	NR
Dugue 2019	5606	NR	Cont	g/day in last week	cg22246785		12	122021013	-0.00139237	2.78e-08	NR	NR	NR
Dugue 2019	5606	NR	Cont	g/day in last week	cg05329352	ADRA2A	10	112838983	-0.0016489	2.76e-08	NR	NR	NR
Dugue 2019	5606	NR	Cont	g/day in last week	cg00972246		1	228265972	-0.00144128	2.75e-08	NR	NR	NR
Dugue 2019	5606	NR	Cont	g/day in last week	cg01526748	FGF12	3	191930926	-0.00188492	2.74e-08	NR	NR	NR
Dugue 2019	5606	NR	Cont	g/day in last week	cg05578595		3	186542905	-0.00126724	2.73e-08	NR	NR	NR
Dugue 2019	5606	NR	Cont	g/day in last week	cg01438090	MPPED2	11	30502936	-0.00154068	2.71e-08	NR	NR	NR
Dugue 2019	5606	NR	Cont	g/day in last week	cg04740898	BZRAP1	17	56402669	-0.00173752	7.06e-08	NR	NR	NR
Dugue 2019	5606	NR	Cont	g/day in last week	cg04745384		12	52242468	-0.000923561	9.44e-08	NR	NR	NR
Dugue 2019	5606	NR	Cont	g/day in last week	cg10813980	FAM49A	2	16845587	-0.00195881	2.64e-08	NR	NR	NR
Dugue 2019	5606	NR	Cont	g/day in last week	cg04752680	RFX1	19	14114100	-0.00105732	1.46e-08	NR	NR	NR
Dugue 2019	5606	NR	Cont	g/day in last week	cg02015582	HLA-DMA	6	32918479	-0.00151733	2.6e-08	NR	NR	NR
Dugue 2019	5606	NR	Cont	g/day in last week	cg04252203		3	194696866	-0.00106449	2.58e-08	NR	NR	NR
Dugue 2019	5606	NR	Cont	g/day in last week	cg21022247	BIN2	12	51718310	-0.000874328	2.58e-08	NR	NR	NR
Dugue 2019	5606	NR	Cont	g/day in last week	cg12044213	CCHCR1	6	31124978	-0.000850518	2.58e-08	NR	NR	NR
Dugue 2019	5606	NR	Cont	g/day in last week	cg04730882	HOXD9	2	176986535	-0.000894776	2.57e-08	NR	NR	NR
Dugue 2019	5606	NR	Cont	g/day in last week	cg18500300	NACAD	7	45128199	-0.00107193	2.56e-08	NR	NR	NR
Dugue 2019	5606	NR	Cont	g/day in last week	cg07826859	MYO1G	7	45020086	-0.00108541	2.55e-08	NR	NR	NR
Dugue 2019	5606	NR	Cont	g/day in last week	cg20811236		18	46501400	-0.00166706	2.54e-08	NR	NR	NR
Dugue 2019	5606	NR	Cont	g/day in last week	cg01179256	CHST11	12	105141965	-0.000952477	2.52e-08	NR	NR	NR
Dugue 2019	5606	NR	Cont	g/day in last week	cg02543850	HIPK3	11	33346306	-0.00126984	2.52e-08	NR	NR	NR
Dugue 2019	5606	NR	Cont	g/day in last week	cg04862321	PPP1R10	6	30580928	-0.00128181	9.04e-08	NR	NR	NR
Dugue 2019	5606	NR	Cont	g/day in last week	cg25256723	F5	1	169555944	-0.00129279	2.5e-08	NR	NR	NR
Dugue 2019	5606	NR	Cont	g/day in last week	cg12354192	TNIK	3	171159987	-0.00194284	2.48e-08	NR	NR	NR
Dugue 2019	5606	NR	Cont	g/day in last week	cg15221739	GPR98	5	90236557	-0.00189142	2.46e-08	NR	NR	NR
Dugue 2019	5606	NR	Cont	g/day in last week	cg23445461	PCDHGA4	5	140864733	-0.00276424	2.45e-08	NR	NR	NR
Dugue 2019	5606	NR	Cont	g/day in last week	cg13311440	CD48	1	160681404	-0.0014015	2.45e-08	NR	NR	NR
Dugue 2019	5606	NR	Cont	g/day in last week	cg18177814	NOD2	16	50730881	-0.000922807	2.45e-08	NR	NR	NR
Dugue 2019	5606	NR	Cont	g/day in last week	cg04885881		1	11123118	-0.00139402	7.75e-09	NR	NR	NR
Dugue 2019	5606	NR	Cont	g/day in last week	cg18854872	SF3B1	2	198292151	-0.00107931	2.36e-08	NR	NR	NR
Dugue 2019	5606	NR	Cont	g/day in last week	cg27455781	IGDCC3	15	65647600	-0.000878853	2.35e-08	NR	NR	NR
Dugue 2019	5606	NR	Cont	g/day in last week	cg06009267	EPPK1	8	144948764	-0.00117997	2.35e-08	NR	NR	NR
Dugue 2019	5606	NR	Cont	g/day in last week	cg04161365	DHRS13	17	27230393	-0.000745658	2.34e-08	NR	NR	NR
Dugue 2019	5606	NR	Cont	g/day in last week	cg08266095		5	123149716	-0.00171633	2.34e-08	NR	NR	NR
Dugue 2019	5606	NR	Cont	g/day in last week	cg03418876	LUC7L3	17	48799340	-0.00155866	2.33e-08	NR	NR	NR
Dugue 2019	5606	NR	Cont	g/day in last week	cg03697881	C7orf10	7	40803287	-0.00141997	2.32e-08	NR	NR	NR
Dugue 2019	5606	NR	Cont	g/day in last week	cg26864395	RUNX3	1	25259106	-0.000712953	2.32e-08	NR	NR	NR
Dugue 2019	5606	NR	Cont	g/day in last week	cg04891961	ANKRD13B	17	27939900	-0.00185626	2.01e-09	NR	NR	NR
Dugue 2019	5606	NR	Cont	g/day in last week	cg10869531	SH3BP2	4	2808489	-0.00157221	2.29e-08	NR	NR	NR
Dugue 2019	5606	NR	Cont	g/day in last week	cg01017147	DNM3	1	171810105	-0.00117936	2.25e-08	NR	NR	NR
Dugue 2019	5606	NR	Cont	g/day in last week	cg03508063	DLG4	17	7124385	-0.00116968	2.22e-08	NR	NR	NR
Dugue 2019	5606	NR	Cont	g/day in last week	cg04907244	SNORD93	7	22894795	-0.00212021	3.39e-09	NR	NR	NR
Dugue 2019	5606	NR	Cont	g/day in last week	cg01634544	TTC9	14	71128147	-0.00159031	2.2e-08	NR	NR	NR
Dugue 2019	5606	NR	Cont	g/day in last week	cg21291385	MRPS6	21	35448215	-0.00151712	2.14e-08	NR	NR	NR
Dugue 2019	5606	NR	Cont	g/day in last week	cg02294302	FOXD2	1	47906276	-0.00088078	2.13e-08	NR	NR	NR
Dugue 2019	5606	NR	Cont	g/day in last week	cg04916802	MIR548F5	13	36052985	-0.00239876	2.4e-15	NR	NR	NR
Dugue 2019	5606	NR	Cont	g/day in last week	cg22877129	C8A	1	57376284	-0.00167372	2.09e-08	NR	NR	NR
Dugue 2019	5606	NR	Cont	g/day in last week	cg20902353	ASB2	14	94425114	-0.00126927	2.09e-08	NR	NR	NR
Dugue 2019	5606	NR	Cont	g/day in last week	cg01459052	CCDC12	3	47016537	-0.000830756	2.07e-08	NR	NR	NR
Dugue 2019	5606	NR	Cont	g/day in last week	cg13201644	STOML1	15	74277634	-0.00106548	2.06e-08	NR	NR	NR
Dugue 2019	5606	NR	Cont	g/day in last week	cg05235540	PPP1R10	6	30582174	-0.00156794	2.06e-08	NR	NR	NR
Dugue 2019	5606	NR	Cont	g/day in last week	cg01557798	OBSCN	1	228400628	-0.00111991	2.03e-08	NR	NR	NR
Dugue 2019	5606	NR	Cont	g/day in last week	cg01062024	IMPDH2	3	49065979	-0.00159617	2.03e-08	NR	NR	NR
Dugue 2019	5606	NR	Cont	g/day in last week	cg11027717		11	33713904	-0.00119903	2.02e-08	NR	NR	NR
Dugue 2019	5606	NR	Cont	g/day in last week	cg07413467	CDK6	7	92238086	-0.00155102	2.01e-08	NR	NR	NR
Dugue 2019	5606	NR	Cont	g/day in last week	cg20747073		19	56148037	-0.00126848	2e-08	NR	NR	NR
Dugue 2019	5606	NR	Cont	g/day in last week	cg16855355		4	185269126	-0.00121168	1.99e-08	NR	NR	NR
Dugue 2019	5606	NR	Cont	g/day in last week	cg19132462	AMPD3	11	10476608	-0.00114077	1.98e-08	NR	NR	NR
Dugue 2019	5606	NR	Cont	g/day in last week	cg15609237	TTN	2	179395885	-0.00124108	1.97e-08	NR	NR	NR
Dugue 2019	5606	NR	Cont	g/day in last week	cg03680873		3	148844300	-0.0031994	1.94e-08	NR	NR	NR
Dugue 2019	5606	NR	Cont	g/day in last week	cg07237979	LSP1	11	1874017	-0.00198519	1.92e-08	NR	NR	NR
Dugue 2019	5606	NR	Cont	g/day in last week	cg04957757	ST3GAL2	16	70463218	-0.00150407	2.2e-10	NR	NR	NR
Dugue 2019	5606	NR	Cont	g/day in last week	cg04445427		8	133699791	-0.00169412	1.84e-08	NR	NR	NR
Dugue 2019	5606	NR	Cont	g/day in last week	cg12699865	RALY	20	32583031	-0.000980679	1.84e-08	NR	NR	NR
Dugue 2019	5606	NR	Cont	g/day in last week	cg23994468		19	56147306	-0.000750331	1.84e-08	NR	NR	NR
Dugue 2019	5606	NR	Cont	g/day in last week	cg18439080		X	70273384	-0.00175028	1.83e-08	NR	NR	NR
Dugue 2019	5606	NR	Cont	g/day in last week	cg07286341	PDLIM7	5	176923805	-0.00113515	1.83e-08	NR	NR	NR
Dugue 2019	5606	NR	Cont	g/day in last week	cg16427752	MSH4	1	76262302	-0.000961957	1.82e-08	NR	NR	NR
Dugue 2019	5606	NR	Cont	g/day in last week	cg04983821		5	133407209	-0.00147689	1.06e-09	NR	NR	NR
Dugue 2019	5606	NR	Cont	g/day in last week	cg20814312	GPR39	2	133339746	-0.00162751	1.8e-08	NR	NR	NR
Dugue 2019	5606	NR	Cont	g/day in last week	cg16357582	CSRP1	1	201476557	-0.00101529	1.78e-08	NR	NR	NR
Dugue 2019	5606	NR	Cont	g/day in last week	cg03832440	HS3ST3B1	17	14207241	-0.00212958	1.78e-08	NR	NR	NR
Dugue 2019	5606	NR	Cont	g/day in last week	cg09193791	FXYD6	11	117740722	-0.00114202	1.77e-08	NR	NR	NR
Dugue 2019	5606	NR	Cont	g/day in last week	cg04992150	NUP210	3	13457267	-0.00144563	5.59e-11	NR	NR	NR
Dugue 2019	5606	NR	Cont	g/day in last week	cg05012902	VAMP2	17	8065517	-0.0012859	2.41e-09	NR	NR	NR
Dugue 2019	5606	NR	Cont	g/day in last week	cg03576748	DECR2	16	452547	-0.00128205	1.68e-08	NR	NR	NR
Dugue 2019	5606	NR	Cont	g/day in last week	cg26021714	RNASE2	14	21424117	-0.000869439	1.66e-08	NR	NR	NR
Dugue 2019	5606	NR	Cont	g/day in last week	cg08681689	EIF4G1	3	184034132	-0.000698491	1.66e-08	NR	NR	NR
Dugue 2019	5606	NR	Cont	g/day in last week	cg22078805	FAM171A2	17	42432046	-0.00263693	1.66e-08	NR	NR	NR
Dugue 2019	5606	NR	Cont	g/day in last week	cg16321846	SDK1	7	4050114	-0.00176419	1.65e-08	NR	NR	NR
Dugue 2019	5606	NR	Cont	g/day in last week	cg17295878	TBC1D16	17	77924665	-0.00262988	1.65e-08	NR	NR	NR
Dugue 2019	5606	NR	Cont	g/day in last week	cg13050716	MGLL	3	127416580	-0.00125949	1.65e-08	NR	NR	NR
Dugue 2019	5606	NR	Cont	g/day in last week	cg05093686	MAB21L1	13	36050788	-0.00142106	1.03e-08	NR	NR	NR
Dugue 2019	5606	NR	Cont	g/day in last week	cg05104080	ILKAP	2	239112693	-0.00118942	1.6e-09	NR	NR	NR
Dugue 2019	5606	NR	Cont	g/day in last week	cg02145310	ZMIZ1	10	80844809	-0.000685345	1.61e-08	NR	NR	NR
Dugue 2019	5606	NR	Cont	g/day in last week	cg22814740	FUBP1	1	78442554	-0.000990934	1.61e-08	NR	NR	NR
Dugue 2019	5606	NR	Cont	g/day in last week	cg06628679	CLNK	4	10609880	-0.00100935	1.6e-08	NR	NR	NR
Dugue 2019	5606	NR	Cont	g/day in last week	cg10128479	MEF2D	1	156465749	-0.000774452	1.6e-08	NR	NR	NR
Dugue 2019	5606	NR	Cont	g/day in last week	cg22843803		11	65196125	-0.00145078	1.58e-08	NR	NR	NR
Dugue 2019	5606	NR	Cont	g/day in last week	cg23766254	FAM171A2	17	42431859	-0.00227317	1.58e-08	NR	NR	NR
Dugue 2019	5606	NR	Cont	g/day in last week	cg05652328	EIF4A1	17	7479977	-0.000824429	1.55e-08	NR	NR	NR
Dugue 2019	5606	NR	Cont	g/day in last week	cg11397301	SCG5	15	32933661	-0.00122044	1.55e-08	NR	NR	NR
Dugue 2019	5606	NR	Cont	g/day in last week	cg12140977	ST3GAL1	8	134513309	-0.00098998	1.54e-08	NR	NR	NR
Dugue 2019	5606	NR	Cont	g/day in last week	cg10784813	SOCS1	16	11348678	-0.00143659	1.53e-08	NR	NR	NR
Dugue 2019	5606	NR	Cont	g/day in last week	cg05185634	ADCY4	14	24804750	-0.000875974	3.55e-10	NR	NR	NR
Dugue 2019	5606	NR	Cont	g/day in last week	cg22858169	SMO	7	128832645	-0.000660135	1.53e-08	NR	NR	NR
Dugue 2019	5606	NR	Cont	g/day in last week	cg24331475	TTC39C	18	21596915	-0.00147471	1.51e-08	NR	NR	NR
Dugue 2019	5606	NR	Cont	g/day in last week	cg05205351	NOP56	20	2634775	-0.00140006	1.46e-10	NR	NR	NR
Dugue 2019	5606	NR	Cont	g/day in last week	cg24727216	ASXL1	20	30947724	-0.000792442	1.51e-08	NR	NR	NR
Dugue 2019	5606	NR	Cont	g/day in last week	cg17836487	TMEM131	2	98607810	-0.00167195	1.48e-08	NR	NR	NR
Dugue 2019	5606	NR	Cont	g/day in last week	cg16926809	CASZ1	1	10732464	-0.00169336	1.47e-08	NR	NR	NR
Dugue 2019	5606	NR	Cont	g/day in last week	cg16717008		3	148037650	-0.00242779	1.47e-08	NR	NR	NR
Dugue 2019	5606	NR	Cont	g/day in last week	cg05242244	CSAD	12	53553086	-0.00108124	1.78e-14	NR	NR	NR
Dugue 2019	5606	NR	Cont	g/day in last week	cg23015991	PDE3A	12	20556313	-0.0013631	1.41e-08	NR	NR	NR
Dugue 2019	5606	NR	Cont	g/day in last week	cg21534578	DENND1B	1	197745159	-0.000961307	1.41e-08	NR	NR	NR
Dugue 2019	5606	NR	Cont	g/day in last week	cg05262369	NUCKS1	1	205716365	-0.00161748	3.38e-09	NR	NR	NR
Dugue 2019	5606	NR	Cont	g/day in last week	cg03059247	C8orf12	8	11287657	-0.00116389	1.39e-08	NR	NR	NR
Dugue 2019	5606	NR	Cont	g/day in last week	cg16639915	ZNF609	15	64960011	-0.0015264	1.37e-08	NR	NR	NR
Dugue 2019	5606	NR	Cont	g/day in last week	cg14507891	KLHDC8B	3	49208514	-0.00189963	1.36e-08	NR	NR	NR
Dugue 2019	5606	NR	Cont	g/day in last week	cg02978139	KCNIP4	4	20730493	-0.00130162	1.35e-08	NR	NR	NR
Dugue 2019	5606	NR	Cont	g/day in last week	cg17835180		X	12995592	-0.00212875	1.35e-08	NR	NR	NR
Dugue 2019	5606	NR	Cont	g/day in last week	cg24032304	PTPN11	12	112860691	-0.00136908	1.32e-08	NR	NR	NR
Dugue 2019	5606	NR	Cont	g/day in last week	cg27593537		10	102810606	-0.0010537	1.32e-08	NR	NR	NR
Dugue 2019	5606	NR	Cont	g/day in last week	cg07618085	TBC1D16	17	77924582	-0.00237955	1.32e-08	NR	NR	NR
Dugue 2019	5606	NR	Cont	g/day in last week	cg05288253	ANKRD11	16	89552259	-0.00136954	9.92e-20	NR	NR	NR
Dugue 2019	5606	NR	Cont	g/day in last week	cg03223172		2	182171470	-0.00187847	1.24e-08	NR	NR	NR
Dugue 2019	5606	NR	Cont	g/day in last week	cg08376310	KCNQ1	11	2858621	-0.00246749	1.24e-08	NR	NR	NR
Dugue 2019	5606	NR	Cont	g/day in last week	cg26744362	U2AF2	19	56168861	-0.00118395	1.24e-08	NR	NR	NR
Dugue 2019	5606	NR	Cont	g/day in last week	cg18786171	ADK	10	75935758	-0.00106443	1.21e-08	NR	NR	NR
Dugue 2019	5606	NR	Cont	g/day in last week	cg08036668	GALK2	15	49462157	-0.00142742	1.2e-08	NR	NR	NR
Dugue 2019	5606	NR	Cont	g/day in last week	cg00907427	HNRNPR	1	23668691	-0.00167089	1.2e-08	NR	NR	NR
Dugue 2019	5606	NR	Cont	g/day in last week	cg18835596	MYB	6	135540107	-0.00106838	1.19e-08	NR	NR	NR
Dugue 2019	5606	NR	Cont	g/day in last week	cg25293806	TMEM190	19	55889387	-0.00163772	1.19e-08	NR	NR	NR
Dugue 2019	5606	NR	Cont	g/day in last week	cg22384801	NARG2	15	60767308	-0.00128845	1.19e-08	NR	NR	NR
Dugue 2019	5606	NR	Cont	g/day in last week	cg26687082	ZBTB12	6	31869120	-0.00107199	1.18e-08	NR	NR	NR
Dugue 2019	5606	NR	Cont	g/day in last week	cg08538032	ELAVL4	1	50574507	-0.00175363	1.17e-08	NR	NR	NR
Dugue 2019	5606	NR	Cont	g/day in last week	cg15161854	SNHG3-RCC1	1	28836139	-0.00113102	1.16e-08	NR	NR	NR
Dugue 2019	5606	NR	Cont	g/day in last week	cg06865845	CD300E	17	72608711	-0.000865637	1.15e-08	NR	NR	NR
Dugue 2019	5606	NR	Cont	g/day in last week	cg15644671	CYP26C1	10	94819989	-0.00211547	1.13e-08	NR	NR	NR
Dugue 2019	5606	NR	Cont	g/day in last week	cg08782002	CCDC47	17	61847885	-0.00132689	1.12e-08	NR	NR	NR
Dugue 2019	5606	NR	Cont	g/day in last week	cg15361590	PCDHGA4	5	140864701	-0.00208596	1.12e-08	NR	NR	NR
Dugue 2019	5606	NR	Cont	g/day in last week	cg21402364		15	74257642	-0.00116845	1.1e-08	NR	NR	NR
Dugue 2019	5606	NR	Cont	g/day in last week	cg05308656	ARL4C	2	235406291	-0.00173615	5.28e-08	NR	NR	NR
Dugue 2019	5606	NR	Cont	g/day in last week	cg16618493	ZBTB7B	1	154978980	-0.000815361	1.06e-08	NR	NR	NR
Dugue 2019	5606	NR	Cont	g/day in last week	cg25402049	PRDM2	1	14029875	-0.00182851	1.05e-08	NR	NR	NR
Dugue 2019	5606	NR	Cont	g/day in last week	cg00673191	DOPEY2	21	37536923	-0.00102754	1.05e-08	NR	NR	NR
Dugue 2019	5606	NR	Cont	g/day in last week	cg02696428	LCP1	13	46743535	-0.00155749	1.04e-08	NR	NR	NR
Dugue 2019	5606	NR	Cont	g/day in last week	cg05341260		17	37730450	-0.00197209	2.52e-10	NR	NR	NR
Dugue 2019	5606	NR	Cont	g/day in last week	cg09591519	RPS18	6	33241770	-0.00129589	1e-08	NR	NR	NR
Dugue 2019	5606	NR	Cont	g/day in last week	cg01695406	TMEM190	19	55889276	-0.00241636	1e-08	NR	NR	NR
Dugue 2019	5606	NR	Cont	g/day in last week	cg04871807	C5orf27	5	95186505	-0.00137321	9.99e-09	NR	NR	NR
Dugue 2019	5606	NR	Cont	g/day in last week	cg05356319	NFIX	19	13122449	-0.00237684	9.15e-17	NR	NR	NR
Dugue 2019	5606	NR	Cont	g/day in last week	cg11719049	NFIC	19	3434702	-0.0011281	9.85e-09	NR	NR	NR
Dugue 2019	5606	NR	Cont	g/day in last week	cg11491284	GK5	3	141888226	-0.00161513	9.75e-09	NR	NR	NR
Dugue 2019	5606	NR	Cont	g/day in last week	cg16362595	JARID2	6	15305678	-0.00136334	9.72e-09	NR	NR	NR
Dugue 2019	5606	NR	Cont	g/day in last week	cg00567854	BTG2	1	203273693	-0.00122525	9.69e-09	NR	NR	NR
Dugue 2019	5606	NR	Cont	g/day in last week	cg00723017	FER1L6	8	124953650	-0.00111525	9.67e-09	NR	NR	NR
Dugue 2019	5606	NR	Cont	g/day in last week	cg05359207	ZNF217	20	52196506	-0.00181264	2.32e-09	NR	NR	NR
Dugue 2019	5606	NR	Cont	g/day in last week	cg20149625	KLC2	11	66026159	-0.00123492	9.4e-09	NR	NR	NR
Dugue 2019	5606	NR	Cont	g/day in last week	cg04664897		11	72925852	-0.00212373	9.31e-09	NR	NR	NR
Dugue 2019	5606	NR	Cont	g/day in last week	cg25376651	EEF1DP3	13	32505135	-0.001812	9.29e-09	NR	NR	NR
Dugue 2019	5606	NR	Cont	g/day in last week	cg05391998	SPATS2L	2	201229134	-0.00157525	2.11e-08	NR	NR	NR
Dugue 2019	5606	NR	Cont	g/day in last week	cg23510764		5	166419955	-0.00178603	9.1e-09	NR	NR	NR
Dugue 2019	5606	NR	Cont	g/day in last week	cg04881228		2	64557277	-0.000978564	9.1e-09	NR	NR	NR
Dugue 2019	5606	NR	Cont	g/day in last week	cg16537483	MBNL1	3	152019539	-0.00198652	9.07e-09	NR	NR	NR
Dugue 2019	5606	NR	Cont	g/day in last week	cg05383531		3	49384054	-0.00135337	9.02e-09	NR	NR	NR
Dugue 2019	5606	NR	Cont	g/day in last week	cg17080371	CCNI	4	77994145	-0.0018035	8.97e-09	NR	NR	NR
Dugue 2019	5606	NR	Cont	g/day in last week	cg17755386	SNORD46	1	45242191	-0.00100274	8.94e-09	NR	NR	NR
Dugue 2019	5606	NR	Cont	g/day in last week	cg16167741	NFYC	1	41174793	-0.00219963	8.9e-09	NR	NR	NR
Dugue 2019	5606	NR	Cont	g/day in last week	cg05201185	HLA-E	6	30459139	-0.00112165	8.79e-09	NR	NR	NR
Dugue 2019	5606	NR	Cont	g/day in last week	cg19881557		14	20967426	-0.00113724	8.69e-09	NR	NR	NR
Dugue 2019	5606	NR	Cont	g/day in last week	cg05438378	SMAD3	15	67383736	-0.00185016	1.23e-09	NR	NR	NR
Dugue 2019	5606	NR	Cont	g/day in last week	cg17825400	WIPF1	2	175499639	-0.00108105	8.67e-09	NR	NR	NR
Dugue 2019	5606	NR	Cont	g/day in last week	cg17017272	MAN2A2	15	91447374	-0.000789471	8.63e-09	NR	NR	NR
Dugue 2019	5606	NR	Cont	g/day in last week	cg05510337	ESRP2	16	68268252	-0.000779158	7.09e-09	NR	NR	NR
Dugue 2019	5606	NR	Cont	g/day in last week	cg21301258	RCAN1	21	35898717	-0.0014005	8.54e-09	NR	NR	NR
Dugue 2019	5606	NR	Cont	g/day in last week	cg05641348	LMNB2	19	2455563	-0.00130051	8.33e-09	NR	NR	NR
Dugue 2019	5606	NR	Cont	g/day in last week	cg05512483	SNORD30	11	62621791	-0.00201608	5.73e-15	NR	NR	NR
Dugue 2019	5606	NR	Cont	g/day in last week	cg08691235	TTN	2	179395935	-0.00114284	8.15e-09	NR	NR	NR
Dugue 2019	5606	NR	Cont	g/day in last week	cg10418289	MMP14	14	23308294	-0.00114743	7.9e-09	NR	NR	NR
Dugue 2019	5606	NR	Cont	g/day in last week	cg22649124	LGALS7B	19	39282077	-0.00140393	7.9e-09	NR	NR	NR
Dugue 2019	5606	NR	Cont	g/day in last week	cg08772028	AMICA1	11	118085736	-0.00117759	7.87e-09	NR	NR	NR
Dugue 2019	5606	NR	Cont	g/day in last week	cg07683388	ANKRD44	2	198029332	-0.00127826	7.77e-09	NR	NR	NR
Dugue 2019	5606	NR	Cont	g/day in last week	cg09138671	TMCO4	1	20125846	-0.00144929	7.69e-09	NR	NR	NR
Dugue 2019	5606	NR	Cont	g/day in last week	cg18675610	ARHGAP12	10	32216311	-0.00188247	7.67e-09	NR	NR	NR
Dugue 2019	5606	NR	Cont	g/day in last week	cg02564523	ORAI2	7	102073539	-0.00161822	7.66e-09	NR	NR	NR
Dugue 2019	5606	NR	Cont	g/day in last week	cg07774299	RABGGTB	1	76253445	-0.00211096	7.64e-09	NR	NR	NR
Dugue 2019	5606	NR	Cont	g/day in last week	cg05232694		20	48809539	-0.00177593	7.61e-09	NR	NR	NR
Dugue 2019	5606	NR	Cont	g/day in last week	cg15855924	ANKRD10	13	111565111	-0.00138117	7.59e-09	NR	NR	NR
Dugue 2019	5606	NR	Cont	g/day in last week	cg04155086	YTHDC1	4	69207281	-0.00131924	7.52e-09	NR	NR	NR
Dugue 2019	5606	NR	Cont	g/day in last week	cg24474409	ACTR3C	7	150021518	-0.00160038	7.5e-09	NR	NR	NR
Dugue 2019	5606	NR	Cont	g/day in last week	cg05523603		22	50973101	-0.00170089	3.22e-10	NR	NR	NR
Dugue 2019	5606	NR	Cont	g/day in last week	cg26353783	GATAD2B	1	153892794	-0.00102818	7.45e-09	NR	NR	NR
Dugue 2019	5606	NR	Cont	g/day in last week	cg23651872	TBC1D16	17	77924733	-0.00283902	7.42e-09	NR	NR	NR
Dugue 2019	5606	NR	Cont	g/day in last week	cg06228828	DLEU2	13	50653048	-0.00105788	7.36e-09	NR	NR	NR
Dugue 2019	5606	NR	Cont	g/day in last week	cg00320980		10	134839587	-0.00107074	7.35e-09	NR	NR	NR
Dugue 2019	5606	NR	Cont	g/day in last week	cg03432225	MRPL55	1	228294401	-0.00125421	7.28e-09	NR	NR	NR
Dugue 2019	5606	NR	Cont	g/day in last week	cg03360992	TRIOBP	22	38093207	-0.00188436	7.25e-09	NR	NR	NR
Dugue 2019	5606	NR	Cont	g/day in last week	cg18008247	HEG1	3	124719009	-0.00115038	7.16e-09	NR	NR	NR
Dugue 2019	5606	NR	Cont	g/day in last week	cg13501527	PHF19	9	123640474	-0.00108072	6.93e-09	NR	NR	NR
Dugue 2019	5606	NR	Cont	g/day in last week	cg05928537	COTL1	16	84631739	-0.000918135	6.92e-09	NR	NR	NR
Dugue 2019	5606	NR	Cont	g/day in last week	cg08441314	SORL1	11	121446689	-0.00156985	6.87e-09	NR	NR	NR
Dugue 2019	5606	NR	Cont	g/day in last week	cg10773266	HNRNPF	10	43895225	-0.00113576	6.86e-09	NR	NR	NR
Dugue 2019	5606	NR	Cont	g/day in last week	cg03764274	C17orf90	17	79632335	-0.000841042	6.75e-09	NR	NR	NR
Dugue 2019	5606	NR	Cont	g/day in last week	cg02652361	MALAT1	11	65263917	-0.00145272	6.75e-09	NR	NR	NR
Dugue 2019	5606	NR	Cont	g/day in last week	cg01520105	TRAF3IP2	6	111887243	-0.000841436	6.7e-09	NR	NR	NR
Dugue 2019	5606	NR	Cont	g/day in last week	cg20319654	WDR43	2	29121607	-0.00121271	6.7e-09	NR	NR	NR
Dugue 2019	5606	NR	Cont	g/day in last week	cg14081226		10	5563419	-0.00164609	6.68e-09	NR	NR	NR
Dugue 2019	5606	NR	Cont	g/day in last week	cg24279017	ETV6	12	11877740	-0.00122134	6.63e-09	NR	NR	NR
Dugue 2019	5606	NR	Cont	g/day in last week	cg05603985	SKI	1	2161049	-0.00113668	3.79e-12	NR	NR	NR
Dugue 2019	5606	NR	Cont	g/day in last week	cg22160883	MATR3	5	138609222	-0.00151793	6.53e-09	NR	NR	NR
Dugue 2019	5606	NR	Cont	g/day in last week	cg02794984	KCNH4	17	40332140	-0.00105842	6.28e-09	NR	NR	NR
Dugue 2019	5606	NR	Cont	g/day in last week	cg11370064		3	78318277	-0.00185548	6.25e-09	NR	NR	NR
Dugue 2019	5606	NR	Cont	g/day in last week	cg14778169	CACNA2D1	7	82073751	-0.00143059	6.19e-09	NR	NR	NR
Dugue 2019	5606	NR	Cont	g/day in last week	cg11821200	PTGER4	5	40685989	-0.00121462	6.17e-09	NR	NR	NR
Dugue 2019	5606	NR	Cont	g/day in last week	cg04864179	IRF5	7	128579964	-0.00124674	6.1e-09	NR	NR	NR
Dugue 2019	5606	NR	Cont	g/day in last week	cg13430057	CRB2	9	126135300	-0.00141241	6.05e-09	NR	NR	NR
Dugue 2019	5606	NR	Cont	g/day in last week	cg27111444		12	54590808	-0.00187029	6.05e-09	NR	NR	NR
Dugue 2019	5606	NR	Cont	g/day in last week	cg07894352	ZNF233	19	44763993	-0.00239213	6.01e-09	NR	NR	NR
Dugue 2019	5606	NR	Cont	g/day in last week	cg01882566	RPGR	X	38187196	-0.00162449	5.96e-09	NR	NR	NR
Dugue 2019	5606	NR	Cont	g/day in last week	cg03474926	RALGDS	9	136023407	-0.000681417	5.89e-09	NR	NR	NR
Dugue 2019	5606	NR	Cont	g/day in last week	cg06616081	TSPAN3	15	77336938	-0.00122237	5.83e-09	NR	NR	NR
Dugue 2019	5606	NR	Cont	g/day in last week	cg16168570	TBL1XR1	3	176898830	-0.00181851	5.8e-09	NR	NR	NR
Dugue 2019	5606	NR	Cont	g/day in last week	cg06808571	KCNH2	7	150642256	-0.0010752	5.79e-09	NR	NR	NR
Dugue 2019	5606	NR	Cont	g/day in last week	cg03117379	SNORD17	20	17943971	-0.00128859	5.76e-09	NR	NR	NR
Dugue 2019	5606	NR	Cont	g/day in last week	cg18672030	RELL1	4	37668528	-0.00195124	5.68e-09	NR	NR	NR
Dugue 2019	5606	NR	Cont	g/day in last week	cg13151425	LFNG	7	2561116	-0.0012202	5.57e-09	NR	NR	NR
Dugue 2019	5606	NR	Cont	g/day in last week	cg05644767	ITGAX	16	31366118	-0.00127893	3.68e-10	NR	NR	NR
Dugue 2019	5606	NR	Cont	g/day in last week	cg15289466	UBE2D3	4	103740913	-0.00117524	5.42e-09	NR	NR	NR
Dugue 2019	5606	NR	Cont	g/day in last week	cg07351143		10	22623910	-0.00112328	5.41e-09	NR	NR	NR
Dugue 2019	5606	NR	Cont	g/day in last week	cg04915300	GPD2	2	157314925	-0.00111855	5.33e-09	NR	NR	NR
Dugue 2019	5606	NR	Cont	g/day in last week	cg05649922	ARID1A	1	27029290	-0.00107041	4.1e-11	NR	NR	NR
Dugue 2019	5606	NR	Cont	g/day in last week	cg08479476	PCBP1	2	70313163	-0.00251602	5.2e-09	NR	NR	NR
Dugue 2019	5606	NR	Cont	g/day in last week	cg23265096	CTSZ	20	57582594	-0.00130735	5.19e-09	NR	NR	NR
Dugue 2019	5606	NR	Cont	g/day in last week	cg05668853	RAB34	17	27044169	-0.00145981	1.61e-10	NR	NR	NR
Dugue 2019	5606	NR	Cont	g/day in last week	cg00001793	ETV6	12	11905390	-0.00247076	5.1e-09	NR	NR	NR
Dugue 2019	5606	NR	Cont	g/day in last week	cg04134965	PARVB	22	44423205	-0.00181954	5.06e-09	NR	NR	NR
Dugue 2019	5606	NR	Cont	g/day in last week	cg20033652	NIN	14	51290662	-0.00120885	5.05e-09	NR	NR	NR
Dugue 2019	5606	NR	Cont	g/day in last week	cg01979270	PDPK1	16	2589773	-0.00116408	5.04e-09	NR	NR	NR
Dugue 2019	5606	NR	Cont	g/day in last week	cg00923634	MAN1C1	1	25968448	-0.00145496	5.02e-09	NR	NR	NR
Dugue 2019	5606	NR	Cont	g/day in last week	cg05716556	ABI3	17	47287410	-0.00108428	5.7e-10	NR	NR	NR
Dugue 2019	5606	NR	Cont	g/day in last week	cg22609908		12	858759	-0.00121451	4.66e-09	NR	NR	NR
Dugue 2019	5606	NR	Cont	g/day in last week	cg02839351	HDGF2	19	4475009	-0.000820363	4.6e-09	NR	NR	NR
Dugue 2019	5606	NR	Cont	g/day in last week	cg05721773	FAIM3	1	207083336	-0.000983888	6.43e-13	NR	NR	NR
Dugue 2019	5606	NR	Cont	g/day in last week	cg01395047	TLR9	3	52260349	-0.000581939	4.59e-09	NR	NR	NR
Dugue 2019	5606	NR	Cont	g/day in last week	cg04004558	SOCS1	16	11348684	-0.00132394	4.51e-09	NR	NR	NR
Dugue 2019	5606	NR	Cont	g/day in last week	cg22129180		8	49892980	-0.00152018	4.47e-09	NR	NR	NR
Dugue 2019	5606	NR	Cont	g/day in last week	cg02364826	FEM1C	5	114878738	-0.00152363	4.45e-09	NR	NR	NR
Dugue 2019	5606	NR	Cont	g/day in last week	cg01278873	ZNF233	19	44764101	-0.00264883	4.41e-09	NR	NR	NR
Dugue 2019	5606	NR	Cont	g/day in last week	cg25008614	SPG11	15	44956192	-0.000946947	4.38e-09	NR	NR	NR
Dugue 2019	5606	NR	Cont	g/day in last week	cg24150385	LRIG1	3	66543263	-0.00173785	4.37e-09	NR	NR	NR
Dugue 2019	5606	NR	Cont	g/day in last week	cg04229928		11	119303807	-0.0021987	4.37e-09	NR	NR	NR
Dugue 2019	5606	NR	Cont	g/day in last week	cg23051123		1	226132841	-0.00124754	4.28e-09	NR	NR	NR
Dugue 2019	5606	NR	Cont	g/day in last week	cg03652339	DUSP5	10	112258641	-0.0013326	4.24e-09	NR	NR	NR
Dugue 2019	5606	NR	Cont	g/day in last week	cg18183961	RBM47	4	40519094	-0.00118645	4.23e-09	NR	NR	NR
Dugue 2019	5606	NR	Cont	g/day in last week	cg03547355		1	227003060	-0.00116576	4.22e-09	NR	NR	NR
Dugue 2019	5606	NR	Cont	g/day in last week	cg25710298	FAM150B	2	286830	-0.00211483	4.22e-09	NR	NR	NR
Dugue 2019	5606	NR	Cont	g/day in last week	cg05751148	PTPRCAP	11	67204799	0.00123342	1.52e-09	NR	NR	NR
Dugue 2019	5606	NR	Cont	g/day in last week	cg07669182	FYB	5	39203755	-0.00121694	4.18e-09	NR	NR	NR
Dugue 2019	5606	NR	Cont	g/day in last week	cg17016266	B3GNT7	2	232261238	-0.00171436	4.1e-09	NR	NR	NR
Dugue 2019	5606	NR	Cont	g/day in last week	cg18342964	C6orf114	6	13471187	-0.00146929	4.1e-09	NR	NR	NR
Dugue 2019	5606	NR	Cont	g/day in last week	cg08323277	LAPTM4A	2	20248420	-0.00133535	4.1e-09	NR	NR	NR
Dugue 2019	5606	NR	Cont	g/day in last week	cg18914962	MAP3K5	6	136914796	-0.00109861	4.05e-09	NR	NR	NR
Dugue 2019	5606	NR	Cont	g/day in last week	cg16119613		12	127762762	-0.00138592	3.97e-09	NR	NR	NR
Dugue 2019	5606	NR	Cont	g/day in last week	cg25167447	NAV1	1	201617042	-0.00210469	3.96e-09	NR	NR	NR
Dugue 2019	5606	NR	Cont	g/day in last week	cg05785989		10	3306812	-0.00111738	2.24e-09	NR	NR	NR
Dugue 2019	5606	NR	Cont	g/day in last week	cg03068319	FAM8A1	6	17600252	-0.0014053	3.89e-09	NR	NR	NR
Dugue 2019	5606	NR	Cont	g/day in last week	cg06686679		19	47139761	-0.000576429	3.77e-09	NR	NR	NR
Dugue 2019	5606	NR	Cont	g/day in last week	cg22306579	ZBTB12	6	31869057	-0.00206092	3.71e-09	NR	NR	NR
Dugue 2019	5606	NR	Cont	g/day in last week	cg02892925	TOX	8	60032926	-0.00210922	3.71e-09	NR	NR	NR
Dugue 2019	5606	NR	Cont	g/day in last week	cg14071869		6	41624407	-0.00111391	3.69e-09	NR	NR	NR
Dugue 2019	5606	NR	Cont	g/day in last week	cg17501982	NCK2	2	106417701	-0.00115858	3.65e-09	NR	NR	NR
Dugue 2019	5606	NR	Cont	g/day in last week	cg05796704	FBXO44	1	11714218	-0.00145537	1.47e-09	NR	NR	NR
Dugue 2019	5606	NR	Cont	g/day in last week	cg20941184	HSD11B1	1	209878178	-0.00116444	3.61e-09	NR	NR	NR
Dugue 2019	5606	NR	Cont	g/day in last week	cg26707646	WIPF1	2	175464253	-0.00140653	3.6e-09	NR	NR	NR
Dugue 2019	5606	NR	Cont	g/day in last week	cg26846781	KCNH6	17	61620942	-0.000741101	3.54e-09	NR	NR	NR
Dugue 2019	5606	NR	Cont	g/day in last week	cg25841008	TSPAN5	4	99534176	-0.00120267	3.48e-09	NR	NR	NR
Dugue 2019	5606	NR	Cont	g/day in last week	cg25840926	RHOB	2	20647987	-0.00176583	3.47e-09	NR	NR	NR
Dugue 2019	5606	NR	Cont	g/day in last week	cg16104139		5	134829480	-0.00100655	3.46e-09	NR	NR	NR
Dugue 2019	5606	NR	Cont	g/day in last week	cg19273683	ECE1	1	21656047	-0.001276	3.35e-09	NR	NR	NR
Dugue 2019	5606	NR	Cont	g/day in last week	cg15146567	ZNF662	3	42948626	-0.00127491	3.34e-09	NR	NR	NR
Dugue 2019	5606	NR	Cont	g/day in last week	cg08243524	DENND1C	19	6482011	-0.00195704	3.27e-09	NR	NR	NR
Dugue 2019	5606	NR	Cont	g/day in last week	cg13305415	SPRY4	5	141697464	-0.00153149	3.23e-09	NR	NR	NR
Dugue 2019	5606	NR	Cont	g/day in last week	cg00908631	CDKN2C	1	51433616	-0.00306736	3.22e-09	NR	NR	NR
Dugue 2019	5606	NR	Cont	g/day in last week	cg20686125	AKT3	1	243902978	-0.000886523	3.22e-09	NR	NR	NR
Dugue 2019	5606	NR	Cont	g/day in last week	cg26477856	DGKA	12	56324915	-0.00106042	3.18e-09	NR	NR	NR
Dugue 2019	5606	NR	Cont	g/day in last week	cg08677140	PPP1R10	6	30582241	-0.00196174	3.14e-09	NR	NR	NR
Dugue 2019	5606	NR	Cont	g/day in last week	cg18330338	SEMA5A	5	9047211	-0.00164724	3.14e-09	NR	NR	NR
Dugue 2019	5606	NR	Cont	g/day in last week	cg14756878		2	12568736	-0.00121498	3.11e-09	NR	NR	NR
Dugue 2019	5606	NR	Cont	g/day in last week	cg23779890	GDAP1	8	75262522	-0.00107686	3.06e-09	NR	NR	NR
Dugue 2019	5606	NR	Cont	g/day in last week	cg24067118		10	102806933	-0.00192416	3.05e-09	NR	NR	NR
Dugue 2019	5606	NR	Cont	g/day in last week	cg15172739	SNORD30	11	62621258	-0.00134184	3.04e-09	NR	NR	NR
Dugue 2019	5606	NR	Cont	g/day in last week	cg27156259	PXN	12	120688673	-0.00155062	3.03e-09	NR	NR	NR
Dugue 2019	5606	NR	Cont	g/day in last week	cg05951221		2	233284402	-0.00182369	6.7e-12	NR	NR	NR
Dugue 2019	5606	NR	Cont	g/day in last week	cg05958351	SRRM2	16	2804731	-0.00157809	5.36e-16	NR	NR	NR
Dugue 2019	5606	NR	Cont	g/day in last week	cg14475840	C9orf30	9	103191817	-0.00123715	2.68e-09	NR	NR	NR
Dugue 2019	5606	NR	Cont	g/day in last week	cg05522498	DCPS	11	126211099	-0.00130445	2.65e-09	NR	NR	NR
Dugue 2019	5606	NR	Cont	g/day in last week	cg17093466	BTBD19	1	45276537	-0.00117448	2.57e-09	NR	NR	NR
Dugue 2019	5606	NR	Cont	g/day in last week	cg04173586	DOT1L	19	2167496	-0.00226083	2.46e-09	NR	NR	NR
Dugue 2019	5606	NR	Cont	g/day in last week	cg06038367	CORO1A	16	30198370	-0.00246023	2.49e-09	NR	NR	NR
Dugue 2019	5606	NR	Cont	g/day in last week	cg01064373	HLA-C	6	31238245	-0.00125762	2.37e-09	NR	NR	NR
Dugue 2019	5606	NR	Cont	g/day in last week	cg06121808	SLC20A1	2	113404678	-0.00117599	2.35e-09	NR	NR	NR
Dugue 2019	5606	NR	Cont	g/day in last week	cg11027221	UNC93B1	11	67770665	-0.000958137	2.35e-09	NR	NR	NR
Dugue 2019	5606	NR	Cont	g/day in last week	cg24242519	FAM49A	2	16846569	-0.00229672	2.28e-09	NR	NR	NR
Dugue 2019	5606	NR	Cont	g/day in last week	cg00204748	FAR2	12	29376779	-0.00145685	2.23e-09	NR	NR	NR
Dugue 2019	5606	NR	Cont	g/day in last week	cg03737424		16	67550511	-0.00149016	2.21e-09	NR	NR	NR
Dugue 2019	5606	NR	Cont	g/day in last week	cg06180389	CD53	1	111436823	-0.00130469	1.43e-08	NR	NR	NR
Dugue 2019	5606	NR	Cont	g/day in last week	cg08973382	LOC151534	2	74728623	-0.00113131	2.16e-09	NR	NR	NR
Dugue 2019	5606	NR	Cont	g/day in last week	cg06188083	IFIT3	10	91093005	-0.00183272	1.94e-10	NR	NR	NR
Dugue 2019	5606	NR	Cont	g/day in last week	cg06398251	EIF4G1	3	184033620	-0.0015064	2.13e-09	NR	NR	NR
Dugue 2019	5606	NR	Cont	g/day in last week	cg08038291		1	234915028	-0.000787466	2.11e-09	NR	NR	NR
Dugue 2019	5606	NR	Cont	g/day in last week	cg15906260	SNORA4	3	186505240	-0.00150253	2.11e-09	NR	NR	NR
Dugue 2019	5606	NR	Cont	g/day in last week	cg12984877	ZNF827	4	146856745	-0.00137405	2.1e-09	NR	NR	NR
Dugue 2019	5606	NR	Cont	g/day in last week	cg04375784	RPS12	6	133137810	-0.00141511	2.08e-09	NR	NR	NR
Dugue 2019	5606	NR	Cont	g/day in last week	cg05308819		1	155959156	-0.000822676	2.08e-09	NR	NR	NR
Dugue 2019	5606	NR	Cont	g/day in last week	cg22277296		5	54180170	-0.00145025	2.07e-09	NR	NR	NR
Dugue 2019	5606	NR	Cont	g/day in last week	cg06225767	ETV6	12	11912232	-0.0020493	5.16e-11	NR	NR	NR
Dugue 2019	5606	NR	Cont	g/day in last week	cg23598480		2	60102800	-0.00102958	1.95e-09	NR	NR	NR
Dugue 2019	5606	NR	Cont	g/day in last week	cg03389720	ABAT	16	8780048	-0.00159543	1.92e-09	NR	NR	NR
Dugue 2019	5606	NR	Cont	g/day in last week	cg11771602		2	134976155	-0.00147884	1.91e-09	NR	NR	NR
Dugue 2019	5606	NR	Cont	g/day in last week	cg06372223	SLC7A5	16	87899784	-0.00116587	1.34e-12	NR	NR	NR
Dugue 2019	5606	NR	Cont	g/day in last week	cg25974617	TRAM1	8	71520962	-0.00145878	1.87e-09	NR	NR	NR
Dugue 2019	5606	NR	Cont	g/day in last week	cg11800635	DOK1	2	74783088	-0.00146272	1.85e-09	NR	NR	NR
Dugue 2019	5606	NR	Cont	g/day in last week	cg00060836	SNHG6	8	67834312	-0.00146908	1.85e-09	NR	NR	NR
Dugue 2019	5606	NR	Cont	g/day in last week	cg06382664	RELT	11	73098877	-0.00123862	3.11e-11	NR	NR	NR
Dugue 2019	5606	NR	Cont	g/day in last week	cg06414073	GAS2L3	12	100967130	-0.00107487	1.67e-08	NR	NR	NR
Dugue 2019	5606	NR	Cont	g/day in last week	cg17578642	SNORA69	X	118922670	-0.00168296	1.74e-09	NR	NR	NR
Dugue 2019	5606	NR	Cont	g/day in last week	cg22427797		1	214740759	-0.00179925	1.73e-09	NR	NR	NR
Dugue 2019	5606	NR	Cont	g/day in last week	cg18006637	FAM13A	4	89713820	-0.00136706	1.73e-09	NR	NR	NR
Dugue 2019	5606	NR	Cont	g/day in last week	cg25406442	RBM12B	8	94750120	-0.00195158	1.69e-09	NR	NR	NR
Dugue 2019	5606	NR	Cont	g/day in last week	cg05600496		13	80357187	-0.00154603	1.68e-09	NR	NR	NR
Dugue 2019	5606	NR	Cont	g/day in last week	cg14613594	SIRPA	20	1878646	-0.000894238	1.67e-09	NR	NR	NR
Dugue 2019	5606	NR	Cont	g/day in last week	cg06441398	SHANK2	11	70317455	-0.00139305	6.99e-09	NR	NR	NR
Dugue 2019	5606	NR	Cont	g/day in last week	cg22732731	SLC4A3	2	220491907	-0.000711879	1.61e-09	NR	NR	NR
Dugue 2019	5606	NR	Cont	g/day in last week	cg26783727		16	67204807	-0.000983835	1.54e-09	NR	NR	NR
Dugue 2019	5606	NR	Cont	g/day in last week	cg02430584	PRKRIP1	7	102065866	-0.000882295	1.53e-09	NR	NR	NR
Dugue 2019	5606	NR	Cont	g/day in last week	cg24469729	HOXA3	7	27160520	-0.00146659	1.53e-09	NR	NR	NR
Dugue 2019	5606	NR	Cont	g/day in last week	cg13659542		2	31044986	-0.0012985	1.52e-09	NR	NR	NR
Dugue 2019	5606	NR	Cont	g/day in last week	cg10861731	C10orf128	10	50395528	-0.00254577	1.49e-09	NR	NR	NR
Dugue 2019	5606	NR	Cont	g/day in last week	cg02765403	MZF1	19	59075349	-0.000893014	1.44e-09	NR	NR	NR
Dugue 2019	5606	NR	Cont	g/day in last week	cg14364797	FNBP1	9	132651576	-0.00180468	1.39e-09	NR	NR	NR
Dugue 2019	5606	NR	Cont	g/day in last week	cg00874073		17	73073329	-0.0013216	1.36e-09	NR	NR	NR
Dugue 2019	5606	NR	Cont	g/day in last week	cg18541581	CHD8	14	21905982	-0.00080945	1.35e-09	NR	NR	NR
Dugue 2019	5606	NR	Cont	g/day in last week	cg06468626	FAM196B	5	169409235	-0.00213287	1.3e-08	NR	NR	NR
Dugue 2019	5606	NR	Cont	g/day in last week	cg25961567	NCK2	2	106363603	-0.00148643	1.33e-09	NR	NR	NR
Dugue 2019	5606	NR	Cont	g/day in last week	cg06469895	TERF2	16	69418206	-0.00163377	2.36e-19	NR	NR	NR
Dugue 2019	5606	NR	Cont	g/day in last week	cg14817867	PRPSAP2	17	18825380	-0.00228459	1.23e-09	NR	NR	NR
Dugue 2019	5606	NR	Cont	g/day in last week	cg19793809		5	132166663	-0.000900256	1.23e-09	NR	NR	NR
Dugue 2019	5606	NR	Cont	g/day in last week	cg19712659	SNHG12	1	28906356	-0.000803931	1.22e-09	NR	NR	NR
Dugue 2019	5606	NR	Cont	g/day in last week	cg26010110	SMARCA1	X	128657699	-0.00259421	1.19e-09	NR	NR	NR
Dugue 2019	5606	NR	Cont	g/day in last week	cg17002899	HNRNPC	14	21727471	-0.00141504	1.15e-09	NR	NR	NR
Dugue 2019	5606	NR	Cont	g/day in last week	cg01284415	BAX	19	49457725	-0.00158568	1.13e-09	NR	NR	NR
Dugue 2019	5606	NR	Cont	g/day in last week	cg01902758	ST5	11	8816428	-0.00101408	1.1e-09	NR	NR	NR
Dugue 2019	5606	NR	Cont	g/day in last week	cg02959006	DPEP2	16	68033589	-0.000846831	1.09e-09	NR	NR	NR
Dugue 2019	5606	NR	Cont	g/day in last week	cg27407423	GDI2	10	5851600	-0.0013254	1.09e-09	NR	NR	NR
Dugue 2019	5606	NR	Cont	g/day in last week	cg25045785	INPP5F	10	121578639	-0.00147769	1.06e-09	NR	NR	NR
Dugue 2019	5606	NR	Cont	g/day in last week	cg02707799	MYST3	8	41814854	-0.0018844	1.05e-09	NR	NR	NR
Dugue 2019	5606	NR	Cont	g/day in last week	cg23902550	EEF1D	8	144681106	-0.000870704	1.05e-09	NR	NR	NR
Dugue 2019	5606	NR	Cont	g/day in last week	cg06487082	ZNF532	18	56530106	-0.0015998	1.17e-09	NR	NR	NR
Dugue 2019	5606	NR	Cont	g/day in last week	cg22104103	C21orf34	21	17565450	-0.00123399	1.05e-09	NR	NR	NR
Dugue 2019	5606	NR	Cont	g/day in last week	cg02257517	SLC2A6	9	136340262	-0.00110986	1.04e-09	NR	NR	NR
Dugue 2019	5606	NR	Cont	g/day in last week	cg00898920		2	241504756	-0.00101195	1.03e-09	NR	NR	NR
Dugue 2019	5606	NR	Cont	g/day in last week	cg00700039	SMCHD1	18	2659555	-0.00161261	1.02e-09	NR	NR	NR
Dugue 2019	5606	NR	Cont	g/day in last week	cg22239727		11	19264434	-0.000890522	1.01e-09	NR	NR	NR
Dugue 2019	5606	NR	Cont	g/day in last week	cg06534313		16	16405520	-0.000580422	1.09e-11	NR	NR	NR
Dugue 2019	5606	NR	Cont	g/day in last week	cg07970325		6	106497542	-0.00101267	9.97e-10	NR	NR	NR
Dugue 2019	5606	NR	Cont	g/day in last week	cg06577850		7	84002356	-0.00178104	9.66e-10	NR	NR	NR
Dugue 2019	5606	NR	Cont	g/day in last week	cg10502206	ZEB2	2	145182344	-0.00146707	9.64e-10	NR	NR	NR
Dugue 2019	5606	NR	Cont	g/day in last week	cg05439368	TRIM69	15	45028098	-0.00150417	9.55e-10	NR	NR	NR
Dugue 2019	5606	NR	Cont	g/day in last week	cg00880872		9	124887818	-0.00127931	9.44e-10	NR	NR	NR
Dugue 2019	5606	NR	Cont	g/day in last week	cg18923906	TSPAN14	10	82225771	-0.00156481	8.91e-10	NR	NR	NR
Dugue 2019	5606	NR	Cont	g/day in last week	cg00025211	NUDT17	1	145588627	-0.000980623	8.7e-10	NR	NR	NR
Dugue 2019	5606	NR	Cont	g/day in last week	cg20631044	C19orf54	19	41255890	-0.000770262	8.66e-10	NR	NR	NR
Dugue 2019	5606	NR	Cont	g/day in last week	cg24326574	UBL4A	X	153713930	-0.00195329	8.61e-10	NR	NR	NR
Dugue 2019	5606	NR	Cont	g/day in last week	cg06644515	SNORD47	1	173834831	-0.002355	1.47e-30	NR	NR	NR
Dugue 2019	5606	NR	Cont	g/day in last week	cg08617833	SMARCA1	X	128657697	-0.00185877	8.43e-10	NR	NR	NR
Dugue 2019	5606	NR	Cont	g/day in last week	cg04425005	ZNF827	4	146783253	-0.00104507	8.37e-10	NR	NR	NR
Dugue 2019	5606	NR	Cont	g/day in last week	cg04737087	ANKRD53	2	71205052	-0.00161449	8.21e-10	NR	NR	NR
Dugue 2019	5606	NR	Cont	g/day in last week	cg21253590	ORAI2	7	102073120	-0.00158981	8.14e-10	NR	NR	NR
Dugue 2019	5606	NR	Cont	g/day in last week	cg05174975	RPL23	17	37008030	-0.00131536	8.02e-10	NR	NR	NR
Dugue 2019	5606	NR	Cont	g/day in last week	cg03671431		18	61604367	-0.00212357	7.84e-10	NR	NR	NR
Dugue 2019	5606	NR	Cont	g/day in last week	cg04839835		1	159881334	-0.00143942	7.7e-10	NR	NR	NR
Dugue 2019	5606	NR	Cont	g/day in last week	cg16047471	BHLHE41	12	26274563	-0.00146762	7.62e-10	NR	NR	NR
Dugue 2019	5606	NR	Cont	g/day in last week	cg00091302		1	182602986	-0.0012362	7.19e-10	NR	NR	NR
Dugue 2019	5606	NR	Cont	g/day in last week	cg16359901	RNF207	1	6269635	-0.000887	7.13e-10	NR	NR	NR
Dugue 2019	5606	NR	Cont	g/day in last week	cg16407699		10	74020428	-0.00161418	7.11e-10	NR	NR	NR
Dugue 2019	5606	NR	Cont	g/day in last week	cg06647600		1	221051188	-0.00110359	8.42e-09	NR	NR	NR
Dugue 2019	5606	NR	Cont	g/day in last week	cg00609948	NDFIP1	5	141488100	-0.00136077	6.92e-10	NR	NR	NR
Dugue 2019	5606	NR	Cont	g/day in last week	cg06688763	CDK6	7	92238207	-0.00354375	6.25e-16	NR	NR	NR
Dugue 2019	5606	NR	Cont	g/day in last week	cg15150970	DNMT3A	2	25473529	-0.00100741	6.27e-10	NR	NR	NR
Dugue 2019	5606	NR	Cont	g/day in last week	cg14519515	ADRBK1	11	67033594	-0.0024231	6.21e-10	NR	NR	NR
Dugue 2019	5606	NR	Cont	g/day in last week	cg06690548	SLC7A11	4	139162808	-0.00793314	1.36e-86	NR	NR	NR
Dugue 2019	5606	NR	Cont	g/day in last week	cg17889623	KIF21B	1	200990247	-0.00163557	5.93e-10	NR	NR	NR
Dugue 2019	5606	NR	Cont	g/day in last week	cg03538814	LSM14A	19	34667843	-0.00145108	5.86e-10	NR	NR	NR
Dugue 2019	5606	NR	Cont	g/day in last week	cg17918556	LASS6	2	169372300	-0.00150168	5.85e-10	NR	NR	NR
Dugue 2019	5606	NR	Cont	g/day in last week	cg06693983	TMEM190	19	55889216	-0.0039958	4.76e-10	NR	NR	NR
Dugue 2019	5606	NR	Cont	g/day in last week	cg23509869	LST1	6	31553441	-0.000961656	5.47e-10	NR	NR	NR
Dugue 2019	5606	NR	Cont	g/day in last week	cg01573306	DNM3	1	172330400	-0.00225453	5.44e-10	NR	NR	NR
Dugue 2019	5606	NR	Cont	g/day in last week	cg04424621	HIST1H2BJ	6	27101941	-0.00222049	5.44e-10	NR	NR	NR
Dugue 2019	5606	NR	Cont	g/day in last week	cg06720467	SFN	1	27189440	-0.00113354	2.02e-11	NR	NR	NR
Dugue 2019	5606	NR	Cont	g/day in last week	cg06738786	LOC100130264	20	19265058	-0.0015516	5.34e-08	NR	NR	NR
Dugue 2019	5606	NR	Cont	g/day in last week	cg14093127		2	8714417	-0.00232344	4.92e-10	NR	NR	NR
Dugue 2019	5606	NR	Cont	g/day in last week	cg06750564	TBXAS1	7	139637446	-0.000767415	2.45e-08	NR	NR	NR
Dugue 2019	5606	NR	Cont	g/day in last week	cg02011520	RPL32	3	12881672	-0.00101794	4.59e-10	NR	NR	NR
Dugue 2019	5606	NR	Cont	g/day in last week	cg20338754	RNF138	18	29677086	-0.00132053	4.59e-10	NR	NR	NR
Dugue 2019	5606	NR	Cont	g/day in last week	cg06759518	RYBP	3	72496799	-0.00146238	5.23e-09	NR	NR	NR
Dugue 2019	5606	NR	Cont	g/day in last week	cg01481251		11	32912719	-0.00235462	4.55e-10	NR	NR	NR
Dugue 2019	5606	NR	Cont	g/day in last week	cg07519485	MLN	6	33762594	-0.00149621	4.53e-10	NR	NR	NR
Dugue 2019	5606	NR	Cont	g/day in last week	cg13772414	EPHA4	2	222383060	-0.00133429	4.47e-10	NR	NR	NR
Dugue 2019	5606	NR	Cont	g/day in last week	cg06799321	CES3	16	66995143	-0.0016244	9.05e-12	NR	NR	NR
Dugue 2019	5606	NR	Cont	g/day in last week	cg04852339	TANC1	2	159841571	-0.000823955	4.32e-10	NR	NR	NR
Dugue 2019	5606	NR	Cont	g/day in last week	cg09296453	HLA-F	6	29692035	-0.00322804	3.88e-10	NR	NR	NR
Dugue 2019	5606	NR	Cont	g/day in last week	cg10930901		5	146885434	-0.00191669	3.85e-10	NR	NR	NR
Dugue 2019	5606	NR	Cont	g/day in last week	cg06826457		12	12867669	-0.00163994	3.54e-10	NR	NR	NR
Dugue 2019	5606	NR	Cont	g/day in last week	cg09723161	LFNG	7	2563909	-0.00102701	3.74e-10	NR	NR	NR
Dugue 2019	5606	NR	Cont	g/day in last week	cg08595501	IQGAP2	5	75878300	-0.00214706	3.73e-10	NR	NR	NR
Dugue 2019	5606	NR	Cont	g/day in last week	cg19704902		2	8445893	-0.00178869	3.7e-10	NR	NR	NR
Dugue 2019	5606	NR	Cont	g/day in last week	cg15551881	TRAF1	9	123688715	-0.00201627	3.69e-10	NR	NR	NR
Dugue 2019	5606	NR	Cont	g/day in last week	cg06829760	FAM49A	2	16845412	-0.00153763	6.14e-20	NR	NR	NR
Dugue 2019	5606	NR	Cont	g/day in last week	cg06846495	NCL	2	232326668	-0.00167416	2.52e-08	NR	NR	NR
Dugue 2019	5606	NR	Cont	g/day in last week	cg19638749		2	70312615	-0.00257205	3.25e-10	NR	NR	NR
Dugue 2019	5606	NR	Cont	g/day in last week	cg21680729	PEMT	17	17426422	-0.00121636	3.22e-10	NR	NR	NR
Dugue 2019	5606	NR	Cont	g/day in last week	cg06850687		12	56587526	-0.00152562	3.84e-08	NR	NR	NR
Dugue 2019	5606	NR	Cont	g/day in last week	cg17467968		15	77711092	-0.001554	3.18e-10	NR	NR	NR
Dugue 2019	5606	NR	Cont	g/day in last week	cg19779810	SC65	17	39969264	-0.00158379	3.09e-10	NR	NR	NR
Dugue 2019	5606	NR	Cont	g/day in last week	cg22571135		7	55377050	-0.00190079	3.06e-10	NR	NR	NR
Dugue 2019	5606	NR	Cont	g/day in last week	cg06855983	MIR181C	19	13984313	-0.00147262	1.51e-08	NR	NR	NR
Dugue 2019	5606	NR	Cont	g/day in last week	cg06868100	PRR15	7	29606349	-0.00313283	3.35e-10	NR	NR	NR
Dugue 2019	5606	NR	Cont	g/day in last week	cg22984631		3	23803182	-0.00175491	2.88e-10	NR	NR	NR
Dugue 2019	5606	NR	Cont	g/day in last week	cg06874016	NKIRAS2	17	40177415	-0.0012051	3.06e-08	NR	NR	NR
Dugue 2019	5606	NR	Cont	g/day in last week	cg12495559		17	78415034	-0.00140824	2.64e-10	NR	NR	NR
Dugue 2019	5606	NR	Cont	g/day in last week	cg05587627	DDX6	11	118657363	-0.00134454	2.63e-10	NR	NR	NR
Dugue 2019	5606	NR	Cont	g/day in last week	cg08471846	PTBP1	19	799621	-0.0016014	2.62e-10	NR	NR	NR
Dugue 2019	5606	NR	Cont	g/day in last week	cg06899970	DKK4	8	42234669	-0.00193606	5.46e-09	NR	NR	NR
Dugue 2019	5606	NR	Cont	g/day in last week	cg06934523	KIAA0247	14	70077930	-0.001215	5.69e-08	NR	NR	NR
Dugue 2019	5606	NR	Cont	g/day in last week	cg06974428	PIP4K2A	10	22972299	-0.00173923	9.1e-12	NR	NR	NR
Dugue 2019	5606	NR	Cont	g/day in last week	cg10526841	TRIM26	6	30182507	-0.00127557	2.33e-10	NR	NR	NR
Dugue 2019	5606	NR	Cont	g/day in last week	cg06373240	PLEKHF1	19	30162566	-0.00202508	2.33e-10	NR	NR	NR
Dugue 2019	5606	NR	Cont	g/day in last week	cg26316599	ATP6V0E1	5	172456055	-0.000914823	2.2e-10	NR	NR	NR
Dugue 2019	5606	NR	Cont	g/day in last week	cg24028809	RGS17	6	153414101	-0.00178963	2.17e-10	NR	NR	NR
Dugue 2019	5606	NR	Cont	g/day in last week	cg04079760	ESRP2	16	68269694	-0.00132124	2.05e-10	NR	NR	NR
Dugue 2019	5606	NR	Cont	g/day in last week	cg26485844		5	77256916	-0.00159325	2.05e-10	NR	NR	NR
Dugue 2019	5606	NR	Cont	g/day in last week	cg26196087	NOTCH2	1	120530251	-0.00134987	2.01e-10	NR	NR	NR
Dugue 2019	5606	NR	Cont	g/day in last week	cg06983052	LRRC8D	1	90288099	-0.00152296	3.95e-11	NR	NR	NR
Dugue 2019	5606	NR	Cont	g/day in last week	cg22549408	PMAIP1	18	57566300	-0.00218263	1.9e-10	NR	NR	NR
Dugue 2019	5606	NR	Cont	g/day in last week	cg14938561	PSTPIP2	18	43649078	-0.00195499	1.83e-10	NR	NR	NR
Dugue 2019	5606	NR	Cont	g/day in last week	cg14064762	TRAF1	9	123688745	-0.00201423	1.77e-10	NR	NR	NR
Dugue 2019	5606	NR	Cont	g/day in last week	cg08752433	PPTC7	12	111016566	-0.00160906	1.63e-10	NR	NR	NR
Dugue 2019	5606	NR	Cont	g/day in last week	cg09307264	INCA1	17	4902281	-0.00129867	1.62e-10	NR	NR	NR
Dugue 2019	5606	NR	Cont	g/day in last week	cg01180628	BHLHE40	3	5023394	-0.00132044	1.62e-10	NR	NR	NR
Dugue 2019	5606	NR	Cont	g/day in last week	cg15557459	YBX1	1	43152179	-0.001633	1.61e-10	NR	NR	NR
Dugue 2019	5606	NR	Cont	g/day in last week	cg07028396		10	93805682	-0.00210496	1.19e-09	NR	NR	NR
Dugue 2019	5606	NR	Cont	g/day in last week	cg21166916		22	42316481	-0.000954635	1.58e-10	NR	NR	NR
Dugue 2019	5606	NR	Cont	g/day in last week	cg07268332	AMPD3	11	10476494	-0.00146321	1.55e-10	NR	NR	NR
Dugue 2019	5606	NR	Cont	g/day in last week	cg18422972	BCOR	X	40029227	-0.00146717	1.47e-10	NR	NR	NR
Dugue 2019	5606	NR	Cont	g/day in last week	cg07054502	ANKRD11	16	89405478	-0.00092486	1.08e-08	NR	NR	NR
Dugue 2019	5606	NR	Cont	g/day in last week	cg08261702	LOC728743	7	150103112	-0.000940445	1.41e-10	NR	NR	NR
Dugue 2019	5606	NR	Cont	g/day in last week	cg07091481	C10orf58	10	82169149	-0.00111606	6.07e-08	NR	NR	NR
Dugue 2019	5606	NR	Cont	g/day in last week	cg18010131	AMPD3	11	10476620	-0.00159342	1.38e-10	NR	NR	NR
Dugue 2019	5606	NR	Cont	g/day in last week	cg11851129	SHMT2	12	57624530	-0.000984656	1.36e-10	NR	NR	NR
Dugue 2019	5606	NR	Cont	g/day in last week	cg06619959	IL17RE	3	9956506	-0.0010097	1.31e-10	NR	NR	NR
Dugue 2019	5606	NR	Cont	g/day in last week	cg07091529	FAM49A	2	16804409	-0.00134497	2.67e-10	NR	NR	NR
Dugue 2019	5606	NR	Cont	g/day in last week	cg19585100	PAPLN	14	73703023	-0.00126426	1.25e-10	NR	NR	NR
Dugue 2019	5606	NR	Cont	g/day in last week	cg11685223	GZF1	20	23344170	-0.00145879	1.21e-10	NR	NR	NR
Dugue 2019	5606	NR	Cont	g/day in last week	cg07104958	ANUBL1	10	46168551	-0.00135413	5.23e-09	NR	NR	NR
Dugue 2019	5606	NR	Cont	g/day in last week	cg00163372	MYC	8	128752988	-0.00209334	1.19e-10	NR	NR	NR
Dugue 2019	5606	NR	Cont	g/day in last week	cg07175797		16	50317656	-0.00106923	3.06e-13	NR	NR	NR
Dugue 2019	5606	NR	Cont	g/day in last week	cg16209364	MATR3	5	138632600	-0.00244854	1e-10	NR	NR	NR
Dugue 2019	5606	NR	Cont	g/day in last week	cg07298431	PRDM10	11	129817649	-0.000929912	3.08e-08	NR	NR	NR
Dugue 2019	5606	NR	Cont	g/day in last week	cg23689615	LOXL1	15	74228839	-0.00125349	7.34e-11	NR	NR	NR
Dugue 2019	5606	NR	Cont	g/day in last week	cg16663980	MNDA	1	158809049	-0.00157461	7.26e-11	NR	NR	NR
Dugue 2019	5606	NR	Cont	g/day in last week	cg13626881		1	203059178	-0.00114522	6.72e-11	NR	NR	NR
Dugue 2019	5606	NR	Cont	g/day in last week	cg18390959	CLDND2	19	51872257	-0.000827676	6.67e-11	NR	NR	NR
Dugue 2019	5606	NR	Cont	g/day in last week	cg19913291	HCG18	6	30295432	-0.0019035	6.61e-11	NR	NR	NR
Dugue 2019	5606	NR	Cont	g/day in last week	cg07333545		6	52170606	-0.001467	6.98e-10	NR	NR	NR
Dugue 2019	5606	NR	Cont	g/day in last week	cg02766482	SNORA8	11	93466826	-0.00172553	5.64e-11	NR	NR	NR
Dugue 2019	5606	NR	Cont	g/day in last week	cg08186900	TRIM26	6	30182518	-0.00115955	5.44e-11	NR	NR	NR
Dugue 2019	5606	NR	Cont	g/day in last week	cg05400498		10	32049926	-0.00144279	5.3e-11	NR	NR	NR
Dugue 2019	5606	NR	Cont	g/day in last week	cg27230067	AK5	1	77933593	-0.00130336	4.73e-11	NR	NR	NR
Dugue 2019	5606	NR	Cont	g/day in last week	cg22945457	LBR	1	225612608	-0.00131187	4.65e-11	NR	NR	NR
Dugue 2019	5606	NR	Cont	g/day in last week	cg13803234	RAD51L1	14	68830813	-0.00146743	4.52e-11	NR	NR	NR
Dugue 2019	5606	NR	Cont	g/day in last week	cg07519229		22	41486835	-0.0017828	3.14e-08	NR	NR	NR
Dugue 2019	5606	NR	Cont	g/day in last week	cg16657244	NOLC1	10	103911592	-0.00145556	4.1e-11	NR	NR	NR
Dugue 2019	5606	NR	Cont	g/day in last week	cg07529392	FIGNL2	12	52215972	-0.00118554	7.22e-09	NR	NR	NR
Dugue 2019	5606	NR	Cont	g/day in last week	cg07013148		8	146233339	-0.00321149	3.99e-11	NR	NR	NR
Dugue 2019	5606	NR	Cont	g/day in last week	cg07567724	GATAD2B	1	153777721	-0.00210959	3.12e-21	NR	NR	NR
Dugue 2019	5606	NR	Cont	g/day in last week	cg04273431	GNL1	6	30523215	-0.00171513	3.3e-11	NR	NR	NR
Dugue 2019	5606	NR	Cont	g/day in last week	cg15843331	VWCE	11	61063144	-0.00110548	3.24e-11	NR	NR	NR
Dugue 2019	5606	NR	Cont	g/day in last week	cg02341503	ZMYND8	20	45947123	-0.000838699	3.23e-11	NR	NR	NR
Dugue 2019	5606	NR	Cont	g/day in last week	cg09644065	C6orf174	6	127835750	-0.00162794	3.19e-11	NR	NR	NR
Dugue 2019	5606	NR	Cont	g/day in last week	cg25814096	UNK	17	73782472	-0.00140191	3.01e-11	NR	NR	NR
Dugue 2019	5606	NR	Cont	g/day in last week	cg07577824	SNX5	20	17943403	-0.00170119	3.07e-18	NR	NR	NR
Dugue 2019	5606	NR	Cont	g/day in last week	cg22455082	UBE2K	4	39702470	-0.00123585	2.7e-11	NR	NR	NR
Dugue 2019	5606	NR	Cont	g/day in last week	cg10973762	DUT	15	48625931	-0.00178737	2.62e-11	NR	NR	NR
Dugue 2019	5606	NR	Cont	g/day in last week	cg07621224	IKZF1	7	50355506	-0.00126124	9.45e-10	NR	NR	NR
Dugue 2019	5606	NR	Cont	g/day in last week	cg07525202	RHBDL3	17	30591850	-0.00195014	2.31e-11	NR	NR	NR
Dugue 2019	5606	NR	Cont	g/day in last week	cg25420507	LGALS7	19	39261921	-0.0018341	2.19e-11	NR	NR	NR
Dugue 2019	5606	NR	Cont	g/day in last week	cg26531804	SPINT1	15	41135847	-0.00107579	2.1e-11	NR	NR	NR
Dugue 2019	5606	NR	Cont	g/day in last week	cg07626482	SLC1A5	19	47289503	-0.00140752	3.96e-20	NR	NR	NR
Dugue 2019	5606	NR	Cont	g/day in last week	cg06366374	LOC285780	6	6543659	-0.00113836	1.9e-11	NR	NR	NR
Dugue 2019	5606	NR	Cont	g/day in last week	cg08754067	SNORD72	5	40833236	-0.00139436	1.76e-11	NR	NR	NR
Dugue 2019	5606	NR	Cont	g/day in last week	cg26588061	UPF2	10	12086036	-0.00177619	1.73e-11	NR	NR	NR
Dugue 2019	5606	NR	Cont	g/day in last week	cg04474366	SNORA4	3	186505347	-0.00165349	1.52e-11	NR	NR	NR
Dugue 2019	5606	NR	Cont	g/day in last week	cg05008975	SCN4B	11	118022317	-0.00112665	1.49e-11	NR	NR	NR
Dugue 2019	5606	NR	Cont	g/day in last week	cg07631435	ZBTB16	11	114043903	-0.00118644	8.31e-09	NR	NR	NR
Dugue 2019	5606	NR	Cont	g/day in last week	cg07714319	FAM49A	2	16822974	-0.00156239	7.14e-09	NR	NR	NR
Dugue 2019	5606	NR	Cont	g/day in last week	cg07797660	PRDM16	1	3239139	-0.00101363	4.31e-14	NR	NR	NR
Dugue 2019	5606	NR	Cont	g/day in last week	cg07807470	SNHG3-RCC1	1	28837350	-0.00145415	1.61e-10	NR	NR	NR
Dugue 2019	5606	NR	Cont	g/day in last week	cg07814318	KLF13	15	31624584	-0.00197575	2.63e-15	NR	NR	NR
Dugue 2019	5606	NR	Cont	g/day in last week	cg07856667		10	94455710	-0.00440037	6.84e-13	NR	NR	NR
Dugue 2019	5606	NR	Cont	g/day in last week	cg00718036	SGMS2	4	108745325	-0.00164636	8.73e-12	NR	NR	NR
Dugue 2019	5606	NR	Cont	g/day in last week	cg08496737	NXF1	11	62573844	-0.00133354	8.37e-12	NR	NR	NR
Dugue 2019	5606	NR	Cont	g/day in last week	cg07870378	FAM100A	16	4665298	-0.00138348	9.47e-08	NR	NR	NR
Dugue 2019	5606	NR	Cont	g/day in last week	cg07945582	NFE2L3	7	26206579	-0.00145632	1.41e-08	NR	NR	NR
Dugue 2019	5606	NR	Cont	g/day in last week	cg00008671	FAM190B	10	86087961	-0.00168833	7.69e-12	NR	NR	NR
Dugue 2019	5606	NR	Cont	g/day in last week	cg25720264	PLEKHA5	12	19389751	-0.00129435	7.57e-12	NR	NR	NR
Dugue 2019	5606	NR	Cont	g/day in last week	cg01020987	C1orf174	1	3816166	-0.00198221	7.12e-12	NR	NR	NR
Dugue 2019	5606	NR	Cont	g/day in last week	cg14836555		14	24743391	-0.00179631	6.47e-12	NR	NR	NR
Dugue 2019	5606	NR	Cont	g/day in last week	cg08062273	LIMD1	3	45641120	-0.000761975	1.07e-08	NR	NR	NR
Dugue 2019	5606	NR	Cont	g/day in last week	cg03533141	SNORD38A	1	45243518	-0.00103635	5.56e-12	NR	NR	NR
Dugue 2019	5606	NR	Cont	g/day in last week	cg08077617	CES1	16	55868196	-0.00292148	6.23e-10	NR	NR	NR
Dugue 2019	5606	NR	Cont	g/day in last week	cg21522988	FAR2	12	29376872	-0.00167265	4.27e-12	NR	NR	NR
Dugue 2019	5606	NR	Cont	g/day in last week	cg08115371	ODZ4	11	79115706	-0.00288087	1.4e-19	NR	NR	NR
Dugue 2019	5606	NR	Cont	g/day in last week	cg18405341	ATF4	22	39918625	-0.00134423	3.53e-12	NR	NR	NR
Dugue 2019	5606	NR	Cont	g/day in last week	cg24679007	RGS13	1	192604413	-0.00126691	3.53e-12	NR	NR	NR
Dugue 2019	5606	NR	Cont	g/day in last week	cg26607228	HNRNPF	10	43889109	-0.00129702	3.13e-12	NR	NR	NR
Dugue 2019	5606	NR	Cont	g/day in last week	cg08170227	ACTN1	14	69422517	-0.00153204	8.93e-14	NR	NR	NR
Dugue 2019	5606	NR	Cont	g/day in last week	cg08170911	PRKCD	3	53202324	-0.00103797	5.68e-17	NR	NR	NR
Dugue 2019	5606	NR	Cont	g/day in last week	cg08189198	NIN	14	51290136	-0.0015529	6.81e-10	NR	NR	NR
Dugue 2019	5606	NR	Cont	g/day in last week	cg02913882		3	177196501	-0.0018625	2.18e-12	NR	NR	NR
Dugue 2019	5606	NR	Cont	g/day in last week	cg08244750	OTUB2	14	94494115	-0.00153094	1.98e-08	NR	NR	NR
Dugue 2019	5606	NR	Cont	g/day in last week	cg20962215		19	54713514	-0.000998099	2.08e-12	NR	NR	NR
Dugue 2019	5606	NR	Cont	g/day in last week	cg08297686	RAD51L1	14	68943486	-0.001532	7.28e-15	NR	NR	NR
Dugue 2019	5606	NR	Cont	g/day in last week	cg07313882	TMC6	17	76121348	-0.00150482	9.08e-13	NR	NR	NR
Dugue 2019	5606	NR	Cont	g/day in last week	cg08301612	HEXIM1	17	43228571	-0.00173853	1.92e-11	NR	NR	NR
Dugue 2019	5606	NR	Cont	g/day in last week	cg02806322	CMTM7	3	32446568	-0.00176347	7.65e-13	NR	NR	NR
Dugue 2019	5606	NR	Cont	g/day in last week	cg20520115	HK2	2	75063838	-0.00143797	7.65e-13	NR	NR	NR
Dugue 2019	5606	NR	Cont	g/day in last week	cg08312149	HDGF2	19	4475055	-0.000979785	4.21e-09	NR	NR	NR
Dugue 2019	5606	NR	Cont	g/day in last week	cg08335767	HMGA1	6	34206495	-0.0010815	2.2e-08	NR	NR	NR
Dugue 2019	5606	NR	Cont	g/day in last week	cg08529852	EGFL7	9	139557920	-0.000855987	3.31e-08	NR	NR	NR
Dugue 2019	5606	NR	Cont	g/day in last week	cg09121339		2	7571733	-0.0014249	2.57e-13	NR	NR	NR
Dugue 2019	5606	NR	Cont	g/day in last week	cg08604960	ADAM19	5	157003436	-0.00152072	9.69e-10	NR	NR	NR
Dugue 2019	5606	NR	Cont	g/day in last week	cg08616943		7	130552600	-0.00126223	4.06e-09	NR	NR	NR
Dugue 2019	5606	NR	Cont	g/day in last week	cg08647039	NFIX	19	13120987	-0.00153106	4.05e-13	NR	NR	NR
Dugue 2019	5606	NR	Cont	g/day in last week	cg08761535	ZNRF1	16	75079000	-0.0015486	2.96e-10	NR	NR	NR
Dugue 2019	5606	NR	Cont	g/day in last week	cg08763102	HTT	4	3079751	-0.000924301	1.75e-08	NR	NR	NR
Dugue 2019	5606	NR	Cont	g/day in last week	cg08790319	RAB26	16	2203008	-0.00110613	5.66e-09	NR	NR	NR
Dugue 2019	5606	NR	Cont	g/day in last week	cg08841048	ZNF428	19	44124409	-0.00172474	4.76e-08	NR	NR	NR
Dugue 2019	5606	NR	Cont	g/day in last week	cg08893087	FAM69A	1	93416982	-0.00176008	3.18e-09	NR	NR	NR
Dugue 2019	5606	NR	Cont	g/day in last week	cg08899105	CHD2	15	93450671	-0.00140693	1.45e-18	NR	NR	NR
Dugue 2019	5606	NR	Cont	g/day in last week	cg08900404	PRR15	7	29605808	-0.00322219	9.86e-11	NR	NR	NR
Dugue 2019	5606	NR	Cont	g/day in last week	cg10944833	NUP153	6	17702460	-0.00207627	2.5e-14	NR	NR	NR
Dugue 2019	5606	NR	Cont	g/day in last week	cg08984272		2	149884320	-0.00143102	6.41e-12	NR	NR	NR
Dugue 2019	5606	NR	Cont	g/day in last week	cg26282731	ARHGAP10	4	148939288	-0.00189207	1.98e-14	NR	NR	NR
Dugue 2019	5606	NR	Cont	g/day in last week	cg09008322	NSD1	5	176726772	-0.00087856	4.33e-11	NR	NR	NR
Dugue 2019	5606	NR	Cont	g/day in last week	cg09098195	BEND4	4	42155260	-0.00173945	1.43e-09	NR	NR	NR
Dugue 2019	5606	NR	Cont	g/day in last week	cg09154256	RAB1A	2	65352897	-0.000940377	4.22e-11	NR	NR	NR
Dugue 2019	5606	NR	Cont	g/day in last week	cg09175009	FAM18A	16	10912699	-0.000793995	8.99e-08	NR	NR	NR
Dugue 2019	5606	NR	Cont	g/day in last week	cg09190408	PPP1CA	11	67170610	-0.00111859	7.37e-09	NR	NR	NR
Dugue 2019	5606	NR	Cont	g/day in last week	cg09191173	NPAT	11	108090159	-0.00162468	1.4e-10	NR	NR	NR
Dugue 2019	5606	NR	Cont	g/day in last week	cg09257526	IL6R	1	154379696	-0.000936834	9.55e-13	NR	NR	NR
Dugue 2019	5606	NR	Cont	g/day in last week	cg09297903	DKK4	8	42234798	-0.00157032	2.47e-12	NR	NR	NR
Dugue 2019	5606	NR	Cont	g/day in last week	cg09395195	EVI2A	17	29645782	-0.00129094	9.9e-10	NR	NR	NR
Dugue 2019	5606	NR	Cont	g/day in last week	cg09424896	CIB3	19	16284351	-0.00101075	5.26e-10	NR	NR	NR
Dugue 2019	5606	NR	Cont	g/day in last week	cg09448652	SNORD30	11	62621367	-0.00150109	4.03e-11	NR	NR	NR
Dugue 2019	5606	NR	Cont	g/day in last week	cg09496748	ANKRD44	2	198029215	-0.00192174	1.19e-10	NR	NR	NR
Dugue 2019	5606	NR	Cont	g/day in last week	cg09540738	TPD52	8	81080281	-0.00155891	3.15e-08	NR	NR	NR
Dugue 2019	5606	NR	Cont	g/day in last week	cg09613192		2	181388538	-0.00168561	2.59e-09	NR	NR	NR
Dugue 2019	5606	NR	Cont	g/day in last week	cg09635954	PRR15	7	29605624	-0.00251134	1.46e-12	NR	NR	NR
Dugue 2019	5606	NR	Cont	g/day in last week	cg09646173	PDE6A	5	149317669	-0.00213655	6.45e-16	NR	NR	NR
Dugue 2019	5606	NR	Cont	g/day in last week	cg09737197	CPT1A	11	68607675	-0.00298153	5.17e-13	NR	NR	NR
Dugue 2019	5606	NR	Cont	g/day in last week	cg09791504	C1orf230	1	151701849	-0.00101348	8.2e-09	NR	NR	NR
Dugue 2019	5606	NR	Cont	g/day in last week	cg09791743	CNPY3	6	42898508	-0.00129321	5.52e-08	NR	NR	NR
Dugue 2019	5606	NR	Cont	g/day in last week	cg09898793	KCNC4	1	110756235	-0.0010842	5.85e-08	NR	NR	NR
Dugue 2019	5606	NR	Cont	g/day in last week	cg09906145	FAM65A	16	67562424	-0.000935939	4.38e-13	NR	NR	NR
Dugue 2019	5606	NR	Cont	g/day in last week	cg09981830		7	55376098	-0.00219013	1.57e-14	NR	NR	NR
Dugue 2019	5606	NR	Cont	g/day in last week	cg10005565		2	235578952	-0.00175939	6.59e-13	NR	NR	NR
Dugue 2019	5606	NR	Cont	g/day in last week	cg10040131	SFXN5	2	73178866	-0.00145583	5.83e-09	NR	NR	NR
Dugue 2019	5606	NR	Cont	g/day in last week	cg10105237	ZFAT	8	135726091	-0.00162207	1.37e-08	NR	NR	NR
Dugue 2019	5606	NR	Cont	g/day in last week	cg10143507		2	118943004	-0.00180558	5.08e-15	NR	NR	NR
Dugue 2019	5606	NR	Cont	g/day in last week	cg10203483		2	85646239	-0.0013779	1.66e-08	NR	NR	NR
Dugue 2019	5606	NR	Cont	g/day in last week	cg10317175		10	25247855	-0.00159363	9.75e-14	NR	NR	NR
Dugue 2019	5606	NR	Cont	g/day in last week	cg10317380	HSPA8	11	122934257	-0.00228357	7.82e-09	NR	NR	NR
Dugue 2019	5606	NR	Cont	g/day in last week	cg10361922	VPS25	17	40925790	-0.00183897	1.02e-11	NR	NR	NR
Dugue 2019	5606	NR	Cont	g/day in last week	cg10370262	PRKAG2	7	151396512	-0.00099939	9.34e-08	NR	NR	NR
Dugue 2019	5606	NR	Cont	g/day in last week	cg10416593	TYMP	22	50966123	-0.00164419	3.19e-09	NR	NR	NR
Dugue 2019	5606	NR	Cont	g/day in last week	cg10439456	TRIM69	15	45028270	-0.00256894	1.1e-13	NR	NR	NR
Dugue 2019	5606	NR	Cont	g/day in last week	cg10440877		2	208378475	-0.00124417	3.17e-09	NR	NR	NR
Dugue 2019	5606	NR	Cont	g/day in last week	cg10488031	IRS2	13	110437561	-0.00115001	5.95e-08	NR	NR	NR
Dugue 2019	5606	NR	Cont	g/day in last week	cg10580293	PRR15	7	29605897	-0.00342132	1.53e-08	NR	NR	NR
Dugue 2019	5606	NR	Cont	g/day in last week	cg10589813		20	48809978	-0.00182818	2.54e-24	NR	NR	NR
Dugue 2019	5606	NR	Cont	g/day in last week	cg10676309		5	137685565	-0.00120208	2.09e-09	NR	NR	NR
Dugue 2019	5606	NR	Cont	g/day in last week	cg10692140		6	30496072	-0.00139584	1.26e-11	NR	NR	NR
Dugue 2019	5606	NR	Cont	g/day in last week	cg10788371	LRRC32	11	76381040	-0.00130259	2.65e-08	NR	NR	NR
Dugue 2019	5606	NR	Cont	g/day in last week	cg10816169		11	66080868	-0.00106248	8.1e-11	NR	NR	NR
Dugue 2019	5606	NR	Cont	g/day in last week	cg10855746	PRKCH	14	61938004	-0.000989477	5.59e-09	NR	NR	NR
Dugue 2019	5606	NR	Cont	g/day in last week	cg10975863	RAD51L1	14	68830704	-0.00166353	1.28e-09	NR	NR	NR
Dugue 2019	5606	NR	Cont	g/day in last week	cg11007850		2	129216138	-0.00187026	8.29e-10	NR	NR	NR
Dugue 2019	5606	NR	Cont	g/day in last week	cg11014740		2	129079223	-0.000983963	2.48e-10	NR	NR	NR
Dugue 2019	5606	NR	Cont	g/day in last week	cg11067714	PURA	5	139492230	-0.00147116	1.11e-08	NR	NR	NR
Dugue 2019	5606	NR	Cont	g/day in last week	cg11068337	HEXIM1	17	43224582	-0.002487	9.29e-14	NR	NR	NR
Dugue 2019	5606	NR	Cont	g/day in last week	cg11127915	NFIX	19	13122381	-0.00293377	1.82e-14	NR	NR	NR
Dugue 2019	5606	NR	Cont	g/day in last week	cg11177833	GLTPD2	17	4692377	-0.00123174	1.51e-08	NR	NR	NR
Dugue 2019	5606	NR	Cont	g/day in last week	cg11220565		20	47934802	-0.00113047	6.14e-08	NR	NR	NR
Dugue 2019	5606	NR	Cont	g/day in last week	cg11288801	DAZAP1	19	1406661	-0.00159025	2e-10	NR	NR	NR
Dugue 2019	5606	NR	Cont	g/day in last week	cg11316386	C1orf229	1	247275808	-0.0015469	2.63e-08	NR	NR	NR
Dugue 2019	5606	NR	Cont	g/day in last week	cg11327857	FGF2	4	123747558	-0.0013406	3.95e-12	NR	NR	NR
Dugue 2019	5606	NR	Cont	g/day in last week	cg11376147	SLC43A1	11	57261198	-0.0020684	2.43e-29	NR	NR	NR
Dugue 2019	5606	NR	Cont	g/day in last week	cg11405200		6	14212128	-0.0013178	3.55e-08	NR	NR	NR
Dugue 2019	5606	NR	Cont	g/day in last week	cg11440375	DKFZP686I15217	6	2988321	-0.000854351	1.11e-08	NR	NR	NR
Dugue 2019	5606	NR	Cont	g/day in last week	cg11551560		15	70528789	-0.00132061	2.75e-12	NR	NR	NR
Dugue 2019	5606	NR	Cont	g/day in last week	cg11555067	INPP4A	2	99081350	-0.00170044	8.08e-11	NR	NR	NR
Dugue 2019	5606	NR	Cont	g/day in last week	cg11576424	C5orf56	5	131750756	-0.001271	1.93e-09	NR	NR	NR
Dugue 2019	5606	NR	Cont	g/day in last week	cg11604426	RHBDL3	17	30592406	-0.0015004	6.89e-09	NR	NR	NR
Dugue 2019	5606	NR	Cont	g/day in last week	cg11613559	INPP5F	10	121577971	-0.00281791	7.98e-13	NR	NR	NR
Dugue 2019	5606	NR	Cont	g/day in last week	cg11660018	PRSS23	11	86510915	-0.00115802	7.95e-08	NR	NR	NR
Dugue 2019	5606	NR	Cont	g/day in last week	cg11681597	SH3BP5L	1	249116587	-0.000997702	1.63e-11	NR	NR	NR
Dugue 2019	5606	NR	Cont	g/day in last week	cg11697038	AHDC1	1	27931284	-0.00173455	5.42e-08	NR	NR	NR
Dugue 2019	5606	NR	Cont	g/day in last week	cg11700584	RPL36AL	14	50088544	-0.00189224	2.67e-10	NR	NR	NR
Dugue 2019	5606	NR	Cont	g/day in last week	cg11701312	RPS5	19	58897497	-0.0012749	5.31e-13	NR	NR	NR
Dugue 2019	5606	NR	Cont	g/day in last week	cg11704631	RUNX1	21	36395663	-0.00141601	3.95e-09	NR	NR	NR
Dugue 2019	5606	NR	Cont	g/day in last week	cg11719283		19	42574717	-0.00122073	7.84e-09	NR	NR	NR
Dugue 2019	5606	NR	Cont	g/day in last week	cg11724055	HNRNPR	1	23667475	-0.00170103	8.19e-12	NR	NR	NR
Dugue 2019	5606	NR	Cont	g/day in last week	cg11753018	RASSF4	10	45469396	-0.00140664	1.38e-08	NR	NR	NR
Dugue 2019	5606	NR	Cont	g/day in last week	cg11826008	CPNE1	20	34249284	-0.00217356	1.48e-22	NR	NR	NR
Dugue 2019	5606	NR	Cont	g/day in last week	cg11927233	NPM1	5	170816542	-0.00201556	1.77e-13	NR	NR	NR
Dugue 2019	5606	NR	Cont	g/day in last week	cg11938386	USP3	15	63807633	-0.00106454	3.3e-08	NR	NR	NR
Dugue 2019	5606	NR	Cont	g/day in last week	cg12069540	C10orf58	10	82173570	-0.00107453	9.28e-11	NR	NR	NR
Dugue 2019	5606	NR	Cont	g/day in last week	cg12147622		10	74021432	-0.00146671	2.31e-08	NR	NR	NR
Dugue 2019	5606	NR	Cont	g/day in last week	cg12194745	BAHCC1	17	79423649	-0.00128576	5.11e-10	NR	NR	NR
Dugue 2019	5606	NR	Cont	g/day in last week	cg12258344		2	47550528	-0.000903429	3.06e-09	NR	NR	NR
Dugue 2019	5606	NR	Cont	g/day in last week	cg12340144	XYLB	3	38388808	-0.00183588	7.96e-13	NR	NR	NR
Dugue 2019	5606	NR	Cont	g/day in last week	cg12467090	PIK3C2B	1	204459139	-0.00165499	6.52e-08	NR	NR	NR
Dugue 2019	5606	NR	Cont	g/day in last week	cg12490835		10	22623821	-0.00147897	1.97e-12	NR	NR	NR
Dugue 2019	5606	NR	Cont	g/day in last week	cg12499872	TEPP	16	58019893	-0.00184545	7.36e-08	NR	NR	NR
Dugue 2019	5606	NR	Cont	g/day in last week	cg12501995		7	142333497	-0.00180438	8.85e-12	NR	NR	NR
Dugue 2019	5606	NR	Cont	g/day in last week	cg12670943	POLDIP3	22	43006541	-0.00121039	5.99e-10	NR	NR	NR
Dugue 2019	5606	NR	Cont	g/day in last week	cg12754982	IGF2R	6	160409942	-0.0014801	3.93e-09	NR	NR	NR
Dugue 2019	5606	NR	Cont	g/day in last week	cg12807764		5	146864669	-0.00197617	1.69e-12	NR	NR	NR
Dugue 2019	5606	NR	Cont	g/day in last week	cg12825509	TRA2B	3	185648568	-0.0032645	7.41e-41	NR	NR	NR
Dugue 2019	5606	NR	Cont	g/day in last week	cg12866859	HEXIM1	17	43224332	-0.00158028	7.91e-16	NR	NR	NR
Dugue 2019	5606	NR	Cont	g/day in last week	cg12916723	NKG7	19	51876788	-0.0011428	1.58e-08	NR	NR	NR
Dugue 2019	5606	NR	Cont	g/day in last week	cg12934382	GRM2	3	51741135	-0.00204183	2.32e-11	NR	NR	NR
Dugue 2019	5606	NR	Cont	g/day in last week	cg12967093	DIRC3	2	218621493	-0.00086321	3.11e-08	NR	NR	NR
Dugue 2019	5606	NR	Cont	g/day in last week	cg13092108	RPS6KA1	1	26857284	-0.00120989	5.51e-15	NR	NR	NR
Dugue 2019	5606	NR	Cont	g/day in last week	cg13182599		14	69282992	-0.00171588	7.76e-10	NR	NR	NR
Dugue 2019	5606	NR	Cont	g/day in last week	cg13238479	MAB21L1	13	36049673	-0.00115163	9.15e-09	NR	NR	NR
Dugue 2019	5606	NR	Cont	g/day in last week	cg13408712	PRDM10	11	129817591	-0.00115445	4.44e-19	NR	NR	NR
Dugue 2019	5606	NR	Cont	g/day in last week	cg13409704		22	22012495	-0.00182487	5.11e-09	NR	NR	NR
Dugue 2019	5606	NR	Cont	g/day in last week	cg13442969	DYRK2	12	68044208	-0.00147077	4.5e-08	NR	NR	NR
Dugue 2019	5606	NR	Cont	g/day in last week	cg13446906	MIR548F5	13	36051073	-0.00259647	7.64e-12	NR	NR	NR
Dugue 2019	5606	NR	Cont	g/day in last week	cg13458211	B4GALT2	1	44444217	-0.0010622	9.32e-11	NR	NR	NR
Dugue 2019	5606	NR	Cont	g/day in last week	cg13477101	C7orf50	7	1067302	-0.000973718	6.91e-08	NR	NR	NR
Dugue 2019	5606	NR	Cont	g/day in last week	cg13490403	LHX6	9	124982413	-0.00326974	2.6e-09	NR	NR	NR
Dugue 2019	5606	NR	Cont	g/day in last week	cg13522406	PPP1R10	6	30581820	-0.0013347	2.59e-12	NR	NR	NR
Dugue 2019	5606	NR	Cont	g/day in last week	cg13526915		14	24164078	-0.00206525	8.29e-13	NR	NR	NR
[truncated: 6,784 more rows]

## Sheet: S8
Supplementary Table 8: All differentially methylated regions (DMR) associated with alcohol consumption identified from four studies included in the review (only data available online)
Study	n	Ethnicity	Variable type	Variable	Chr	Block Start	Block End	Probe: * Probe names included in the region * no. of CpGs	Value: * T-value for Clark * meanbetafc for Dugue * beta_min; beta_max for Perrier	p-value	q-value	Genes
Clark 2015	619	NR	Cat	Regular user/Never regular user	20	58761092	58761152	NR	-6.10	1.93E-09	0.008
Clark 2015	619	NR	Cat	Regular user/Never regular user	12	20088334	20088355	NR	-5.68	2.14E-08	0.046
Clark 2015	619	NR	Cat	Regular user/Never regular user	15	102383775	102383775	NR	-5.54	4.54E-08	0.065	GPCRLTM7
Clark 2015	619	NR	Cat	Regular user/Never regular user	18	592215	592241	NR	-5.44	7.68E-08	0.066	CETN1/CLUL1
Clark 2015	619	NR	Cat	Regular user/Never regular user	6	11012186	11012186	NR	-5.44	7.72E-08	0.066	ELOVL2
Clark 2015	619	NR	Cat	Regular user/Never regular user	8	26168818	26168887	NR	-5.39	1.02E-07	0.072	PPP2R2A
Clark 2015	619	NR	Cat	Regular user/Never regular user	7	84887803	84887816	NR	-5.36	1.18E-07	0.072
Clark 2015	619	NR	Cat	Regular user/Never regular user	4	140427487	140427494	NR	-5.33	1.40E-07	0.074	SETD7
Clark 2015	619	NR	Cat	Regular user/Never regular user	12	10829931	10829931	NR	-5.31	1.56E-07	0.074	STYK1
Clark 2015	619	NR	Cat	Regular user/Never regular user	17	37504336	37504433	NR	-5.27	1.92E-07	0.079	FBXL20
Clark 2015	619	NR	Cat	Regular user/Never regular user	12	70152252	70152293	NR	-5.24	2.25E-07	0.079	RAB3IP
Clark 2015	619	NR	Cat	Regular user/Never regular user	5	112271135	112271135	NR	-5.22	2.43E-07	0.079	REEP5
Clark 2015	619	NR	Cat	Regular user/Never regular user	8	16136003	16136078	NR	-5.22	2.44E-07	0.079
Clark 2015	619	NR	Cat	Regular user/Never regular user	6	36529872	36529954	NR	-5.21	2.59E-07	0.079	STK38
Clark 2015	619	NR	Cat	Regular user/Never regular user	5	29305151	29305155	NR	-5.19	2.84E-07	0.081
Clark 2015	619	NR	Cat	Regular user/Never regular user	7	123887980	123888000	NR	-5.15	3.54E-07	0.086
Clark 2015	619	NR	Cat	Regular user/Never regular user	15	66622358	66622368	NR	-5.14	3.66E-07	0.086	DIS3L/TIPIN/SCARNA14
Clark 2015	619	NR	Cat	Regular user/Never regular user	13	77687117	77687210	NR	-5.13	3.99E-07	0.086	MYCBP2
Clark 2015	619	NR	Cat	Regular user/Never regular user	18	57638757	57638757	NR	-5.12	4.13E-07	0.086
Clark 2015	619	NR	Cat	Regular user/Never regular user	12	74585726	74585731	NR	-5.11	4.27E-07	0.086	LOC100507377
Clark 2015	619	NR	Cat	Regular user/Never regular user	5	37626839	37626839	NR	-5.11	4.39E-07	0.086	WDR70
Clark 2015	619	NR	Cat	Regular user/Never regular user	6	14523209	14523289	NR	-5.10	4.60E-07	0.086
Clark 2015	619	NR	Cat	Regular user/Never regular user	3	179634002	179634111	NR	-5.09	4.87E-07	0.086	PEX5L
Clark 2015	619	NR	Cat	Regular user/Never regular user	8	113454886	113454986	NR	-5.07	5.29E-07	0.086	CSMD3
Clark 2015	619	NR	Cat	Regular user/Never regular user	6	139500651	139500795	NR	-5.07	5.34E-07	0.086	HECA
Clark 2015	619	NR	Cat	Regular user/Never regular user	1	66275102	66275102	NR	-5.06	5.47E-07	0.086	PDE4B
Clark 2015	619	NR	Cat	Regular user/Never regular user	8	125900827	125900847	NR	-5.06	5.70E-07	0.086
Clark 2015	619	NR	Cat	Regular user/Never regular user	1	108047119	108047119	NR	-5.05	5.77E-07	0.086
Clark 2015	619	NR	Cat	Regular user/Never regular user	2	67680420	67680514	NR	-5.05	5.86E-07	0.086
Clark 2015	619	NR	Cat	Regular user/Never regular user	3	108017604	108017633	NR	-5.02	6.81E-07	0.097	HHLA2
Clark 2015	619	NR	Cat	Regular user/Never regular user	6	10951883	10951912	NR	-5.00	7.68E-07	0.099	SYCP2L
Clark 2015	619	NR	Cat	Regular user/Never regular user	6	38371404	38371450	NR	-5.00	7.69E-07	0.099	BTBD9
Clark 2015	619	NR	Cat	Regular user/Never regular user	5	127258073	127258108	NR	-4.99	7.71E-07	0.099
Langdon 2020	409	NR	Cont	units per week	4	139162808	139163020	cg06690548, cg13903162	NR	1.45 × 10−10	NR	SLC7A11
Dugue 2019	5606	NR	Cont	g/day in last week	13	36048892	36053408	23	-0.000155805	2.13e-38	NR	MAB21L1
Dugue 2019	5606	NR	Cont	g/day in last week	19	13120555	13123217	7	-0.000296122	1.49e-36	NR	NFIX
Dugue 2019	5606	NR	Cont	g/day in last week	19	47287778	47288263	7	-0.000149877	6.81e-32	NR	SLC1A5
Dugue 2019	5606	NR	Cont	g/day in last week	7	27169674	27171528	25	-0.000227214	3.2e-31	NR	HOXA4
Dugue 2019	5606	NR	Cont	g/day in last week	1	173834077	173836636	9	-0.000234462	3.93e-30	NR	GAS5
Dugue 2019	5606	NR	Cont	g/day in last week	11	62620843	62622234	9	-0.000168435	6.05e-30	NR	SNHG1
Dugue 2019	5606	NR	Cont	g/day in last week	19	47289410	47289611	3	-0.000161143	7.05e-29	NR	SLC1A5
Dugue 2019	5606	NR	Cont	g/day in last week	7	29605237	29606985	8	-0.000369661	5.67e-27	NR	PRR15
Dugue 2019	5606	NR	Cont	g/day in last week	15	45027253	45028595	6	-0.000243812	2.22e-26	NR	TRIM69
Dugue 2019	5606	NR	Cont	g/day in last week	3	51740201	51741473	8	-0.000250051	3.25e-25	NR	GRM2
Dugue 2019	5606	NR	Cont	g/day in last week	4	139162808	139163780	5	-0.000158977	3.51e-23	NR	SLC7A11
Dugue 2019	5606	NR	Cont	g/day in last week	7	30635214	30636176	6	-0.000302899	1.05e-21	NR	GARS
Dugue 2019	5606	NR	Cont	g/day in last week	2	16845412	16846569	3	-0.000263499	2.36e-21	NR	FAM49A
Dugue 2019	5606	NR	Cont	g/day in last week	8	42234243	42234975	8	-0.000214384	3.87e-21	NR	DKK4
Dugue 2019	5606	NR	Cont	g/day in last week	11	68606654	68608813	9	-0.000122601	4.61e-20	NR	CPT1A
Dugue 2019	5606	NR	Cont	g/day in last week	16	46918160	46920075	9	-0.000131371	1.96e-19	NR	GPT2
Dugue 2019	5606	NR	Cont	g/day in last week	22	39918625	39919237	3	-0.000191722	2.34e-19	NR
Dugue 2019	5606	NR	Cont	g/day in last week	7	55376098	55377050	3	-0.000287547	6.26e-19	NR
Dugue 2019	5606	NR	Cont	g/day in last week	17	25798202	25799447	9	-0.000132225	1.08e-18	NR	KSR1
Dugue 2019	5606	NR	Cont	g/day in last week	16	68268252	68270882	14	-0.000136054	1.5e-18	NR	ESRP2
Dugue 2019	5606	NR	Cont	g/day in last week	5	139490895	139492727	7	-0.000196579	4.58e-18	NR	PURA
Dugue 2019	5606	NR	Cont	g/day in last week	2	118942638	118943736	8	-0.000168881	6.44e-18	NR	AC093901.1
Dugue 2019	5606	NR	Cont	g/day in last week	7	5567503	5568411	5	-0.000129832	1.09e-17	NR	ACTB
Dugue 2019	5606	NR	Cont	g/day in last week	20	17943403	17944526	4	-0.000180815	4.08e-16	NR	SNORD17
Dugue 2019	5606	NR	Cont	g/day in last week	15	74218418	74219669	14	-0.00012073	5.1e-16	NR	LOXL1
Dugue 2019	5606	NR	Cont	g/day in last week	10	94819559	94821773	14	-0.000145809	6.16e-16	NR	CYP26C1
Dugue 2019	5606	NR	Cont	g/day in last week	2	233283819	233285607	8	-0.000157854	1.16e-15	NR	AC068134.5
Dugue 2019	5606	NR	Cont	g/day in last week	19	52390810	52391789	14	-0.000191353	1.68e-15	NR	ZNF577
Dugue 2019	5606	NR	Cont	g/day in last week	4	123747447	123748386	8	-0.00018597	3.33e-15	NR	FGF2
Dugue 2019	5606	NR	Cont	g/day in last week	20	57581478	57583709	30	-9.2e-05	1.19e-14	NR	CTSZ
Dugue 2019	5606	NR	Cont	g/day in last week	10	121577530	121579393	8	-0.000144143	1.81e-14	NR	INPP5F
Dugue 2019	5606	NR	Cont	g/day in last week	6	31506723	31508934	20	-0.000122408	2.05e-14	NR	DDX39B
Dugue 2019	5606	NR	Cont	g/day in last week	6	31650735	31651362	21	-0.000219968	3.71e-14	NR	LY6G5C
Dugue 2019	5606	NR	Cont	g/day in last week	1	248902767	248903933	7	-0.000133994	7.46e-14	NR	LYPD8
Dugue 2019	5606	NR	Cont	g/day in last week	4	159093841	159095085	8	-0.000128384	7.63e-14	NR	FAM198B
Dugue 2019	5606	NR	Cont	g/day in last week	3	45077070	45078075	9	-0.000230152	1.04e-13	NR	RNU5B
Dugue 2019	5606	NR	Cont	g/day in last week	20	48809539	48810617	3	-0.000217347	1.13e-13	NR
Dugue 2019	5606	NR	Cont	g/day in last week	6	30580928	30583082	10	-0.000122427	1.47e-13	NR	PPP1R10
Dugue 2019	5606	NR	Cont	g/day in last week	8	22560922	22561951	9	-0.000179694	1.6e-13	NR
Dugue 2019	5606	NR	Cont	g/day in last week	1	120255011	120255992	6	-0.000174567	1.64e-13	NR	PHGDH
Dugue 2019	5606	NR	Cont	g/day in last week	5	140864020	140865433	10	-0.000137914	2.17e-13	NR	PCDHGC4
Dugue 2019	5606	NR	Cont	g/day in last week	2	198029141	198029885	4	-0.000181497	2.27e-13	NR
Dugue 2019	5606	NR	Cont	g/day in last week	16	10912331	10912718	6	-0.000183176	2.37e-13	NR	TVP23A
Dugue 2019	5606	NR	Cont	g/day in last week	10	94455543	94455895	4	-0.00015401	2.48e-13	NR
Dugue 2019	5606	NR	Cont	g/day in last week	1	156251280	156251456	3	-0.000176761	2.74e-13	NR	TMEM79
Dugue 2019	5606	NR	Cont	g/day in last week	1	111742515	111744309	10	-0.000126788	2.98e-13	NR	DENND2D
Dugue 2019	5606	NR	Cont	g/day in last week	7	26236069	26236721	2	-0.000216087	3.56e-13	NR	HNRNPA2B1
Dugue 2019	5606	NR	Cont	g/day in last week	19	55887704	55889611	13	-0.000174208	3.87e-13	NR	TMEM190
Dugue 2019	5606	NR	Cont	g/day in last week	5	78985425	78986160	12	-0.000165648	4.89e-13	NR	CMYA5
Dugue 2019	5606	NR	Cont	g/day in last week	3	186505240	186505713	3	-0.000227617	5.49e-13	NR	SNORA63
Dugue 2019	5606	NR	Cont	g/day in last week	11	129817418	129818518	6	-0.000109059	6.17e-13	NR	PRDM10
Dugue 2019	5606	NR	Cont	g/day in last week	10	102806871	102808252	7	-0.000173236	1.04e-12	NR
Dugue 2019	5606	NR	Cont	g/day in last week	17	40438312	40439628	7	-9.57e-05	1.1e-12	NR	STAT5A
Dugue 2019	5606	NR	Cont	g/day in last week	17	56401623	56402669	6	-0.000152787	1.38e-12	NR	BZRAP1
Dugue 2019	5606	NR	Cont	g/day in last week	19	58220080	58220837	11	-0.000157451	1.64e-12	NR	ZNF154
Dugue 2019	5606	NR	Cont	g/day in last week	17	78417789	78418426	7	-0.000216924	1.67e-12	NR
Dugue 2019	5606	NR	Cont	g/day in last week	2	70311984	70313833	9	-0.000165041	1.72e-12	NR	PCBP
Dugue 2019	5606	NR	Cont	g/day in last week	6	33240215	33243120	19	-0.000121914	1.77e-12	NR	VPS52
Dugue 2019	5606	NR	Cont	g/day in last week	20	3148785	3149777	10	-0.000129137	2.18e-12	NR	LZTS3
Dugue 2019	5606	NR	Cont	g/day in last week	22	50983415	50985117	5	-0.000141316	2.82e-12	NR	KLHDC7B
Dugue 2019	5606	NR	Cont	g/day in last week	6	32117401	32121758	69	-9.5e-05	2.99e-12	NR	PRRT1
Dugue 2019	5606	NR	Cont	g/day in last week	1	202130344	202131184	5	-0.000147295	3.15e-12	NR	PTPN7
Dugue 2019	5606	NR	Cont	g/day in last week	6	34205665	34206683	8	-8.88e-05	3.2e-12	NR	HMGA1
Dugue 2019	5606	NR	Cont	g/day in last week	7	2563184	2564966	8	-0.00013174	3.49e-12	NR	LFNG
Dugue 2019	5606	NR	Cont	g/day in last week	13	110436740	110439453	16	-0.000146419	5.12e-12	NR	IRS2
Dugue 2019	5606	NR	Cont	g/day in last week	20	47895899	47897451	9	-0.000151672	7.21e-12	NR	ZFAS1
Dugue 2019	5606	NR	Cont	g/day in last week	4	81117647	81119473	14	-0.00022249	7.85e-12	NR	PRDM8
Dugue 2019	5606	NR	Cont	g/day in last week	10	102278918	102280551	13	-0.000135431	8.85e-12	NR	SEC31B
Dugue 2019	5606	NR	Cont	g/day in last week	12	56390073	56391451	12	-8.82e-05	9.2e-12	NR	SUOX
Dugue 2019	5606	NR	Cont	g/day in last week	17	6946527	6948023	12	-0.000107897	1e-11	NR	SLC16A11
Dugue 2019	5606	NR	Cont	g/day in last week	17	42431109	42432488	7	-0.000246409	1.06e-11	NR	GRN
Dugue 2019	5606	NR	Cont	g/day in last week	11	65194933	65198137	18	-0.000111386	1.54e-11	NR
Dugue 2019	5606	NR	Cont	g/day in last week	3	183958478	183960177	13	-0.000138709	1.62e-11	NR	MIR1224
Dugue 2019	5606	NR	Cont	g/day in last week	13	36046056	36046577	2	-0.000345101	2.02e-11	NR
Dugue 2019	5606	NR	Cont	g/day in last week	3	24535774	24537801	27	-0.000101434	2.09e-11	NR	THRB
Dugue 2019	5606	NR	Cont	g/day in last week	2	202899877	202901470	8	-0.000207894	2.12e-11	NR	FZD7
Dugue 2019	5606	NR	Cont	g/day in last week	22	36806001	36806655	6	-0.000201095	2.31e-11	NR
Dugue 2019	5606	NR	Cont	g/day in last week	1	26857284	26857774	2	-0.000183481	2.77e-11	NR	RPS6KA1
Dugue 2019	5606	NR	Cont	g/day in last week	17	72931569	72932588	13	-0.000112445	3.04e-11	NR	OTOP3
Dugue 2019	5606	NR	Cont	g/day in last week	17	26708226	26708773	3	-0.000204232	3.14e-11	NR
Dugue 2019	5606	NR	Cont	g/day in last week	10	43891459	43892075	3	-0.000183267	3.36e-11	NR	HNRNPF
Dugue 2019	5606	NR	Cont	g/day in last week	12	29376421	29376872	4	-0.00018208	4.48e-11	NR	FAR2
Dugue 2019	5606	NR	Cont	g/day in last week	16	75150456	75150880	8	-0.000198343	4.61e-11	NR	LDHD
Dugue 2019	5606	NR	Cont	g/day in last week	14	74251018	74251926	3	-0.000140721	4.64e-11	NR
Dugue 2019	5606	NR	Cont	g/day in last week	19	19280969	19282451	12	-0.000133791	4.73e-11	NR	MEF2B
Dugue 2019	5606	NR	Cont	g/day in last week	X	48685182	48686200	6	-0.000315441	5.77e-11	NR	ERAS
Dugue 2019	5606	NR	Cont	g/day in last week	16	58019359	58019984	4	-0.000128062	6.63e-11	NR	TEPP
Dugue 2019	5606	NR	Cont	g/day in last week	19	46386030	46386226	2	-0.000223062	6.67e-11	NR
Dugue 2019	5606	NR	Cont	g/day in last week	7	92237376	92238364	7	-0.000176348	6.93e-11	NR
Dugue 2019	5606	NR	Cont	g/day in last week	19	56158209	56160065	12	-0.000120138	6.98e-11	NR	CCDC106
Dugue 2019	5606	NR	Cont	g/day in last week	9	139557460	139557920	2	-0.000167948	7.08e-11	NR	EGFL7
Dugue 2019	5606	NR	Cont	g/day in last week	14	51290136	51290751	4	-0.000174108	7.73e-11	NR	NIN
Dugue 2019	5606	NR	Cont	g/day in last week	7	102072549	102073947	5	-0.00013615	9.16e-11	NR	ORAI2
Dugue 2019	5606	NR	Cont	g/day in last week	6	127835189	127836731	8	-0.000115816	9.53e-11	NR	SOGA3
Dugue 2019	5606	NR	Cont	g/day in last week	8	22735111	22735478	5	-0.000190252	1.02e-10	NR	RP11
Dugue 2019	5606	NR	Cont	g/day in last week	11	128561675	128562908	9	-0.000126461	1.2e-10	NR	FLI1
Dugue 2019	5606	NR	Cont	g/day in last week	6	32941825	32943839	13	-0.000118936	1.42e-10	NR	BRD2
Dugue 2019	5606	NR	Cont	g/day in last week	11	67272636	67274402	6	-9.14e-05	1.42e-10	NR	CDK2AP2
Dugue 2019	5606	NR	Cont	g/day in last week	11	118657127	118657363	2	-0.000176366	1.43e-10	NR
Dugue 2019	5606	NR	Cont	g/day in last week	9	123688715	123689193	3	-0.000195268	1.47e-10	NR	TRAF1
Dugue 2019	5606	NR	Cont	g/day in last week	1	159869223	159870915	10	-0.000129391	1.88e-10	NR	CCDC19
Dugue 2019	5606	NR	Cont	g/day in last week	5	140749735	140750160	6	-0.000224594	1.92e-10	NR	PCDHGB3
Dugue 2019	5606	NR	Cont	g/day in last week	17	42081179	42082647	11	-0.000103029	2.01e-10	NR	NAGS
Dugue 2019	5606	NR	Cont	g/day in last week	17	43224158	43225229	13	-7.18e-05	2.24e-10	NR	HEXIM1
Dugue 2019	5606	NR	Cont	g/day in last week	6	29591706	29593246	5	-0.000145991	2.65e-10	NR	GABBR1
Dugue 2019	5606	NR	Cont	g/day in last week	15	48625058	48625931	2	-0.000245797	2.8e-10	NR	DUT
Dugue 2019	5606	NR	Cont	g/day in last week	4	20253130	20255985	16	-7.64e-05	2.89e-10	NR	SLIT2
Dugue 2019	5606	NR	Cont	g/day in last week	16	67188614	67189948	5	-0.000171119	3.2e-10	NR	TRADD
Dugue 2019	5606	NR	Cont	g/day in last week	1	200990247	200990482	2	-0.000221497	3.33e-10	NR
Dugue 2019	5606	NR	Cont	g/day in last week	15	74724562	74724918	2	-0.000171018	3.37e-10	NR	SEMA7A
Dugue 2019	5606	NR	Cont	g/day in last week	6	30094300	30095802	31	-0.00010252	3.48e-10	NR
Dugue 2019	5606	NR	Cont	g/day in last week	2	223288331	223290515	15	-0.000110491	3.98e-10	NR	SGPP2
Dugue 2019	5606	NR	Cont	g/day in last week	15	93450129	93450671	2	-0.000176602	4.32e-10	NR
Dugue 2019	5606	NR	Cont	g/day in last week	4	3079751	3080113	2	-0.000192191	4.41e-10	NR
Dugue 2019	5606	NR	Cont	g/day in last week	11	129992297	129992368	4	-0.000182975	4.43e-10	NR
Dugue 2019	5606	NR	Cont	g/day in last week	18	42261980	42262885	2	-0.000243178	5.6e-10	NR	SETBP1
Dugue 2019	5606	NR	Cont	g/day in last week	19	44763334	44764603	7	-0.000172878	5.97e-10	NR	ZNF233
Dugue 2019	5606	NR	Cont	g/day in last week	9	130211749	130212635	3	-0.000142875	6.59e-10	NR	LRSAM1
Dugue 2019	5606	NR	Cont	g/day in last week	22	26875499	26876075	7	-0.000140756	7.06e-10	NR	HPS4
Dugue 2019	5606	NR	Cont	g/day in last week	5	135364060	135365401	14	-0.000143162	7.55e-10	NR	TGFBI
Dugue 2019	5606	NR	Cont	g/day in last week	19	799190	800229	3	-0.00015004	9.02e-10	NR	PTBP1
Dugue 2019	5606	NR	Cont	g/day in last week	17	43505638	43507153	10	-8.92e-05	9.2e-10	NR	ARHGAP27
Dugue 2019	5606	NR	Cont	g/day in last week	6	30457711	30460798	44	-7.35e-05	9.28e-10	NR	HLA-E
Dugue 2019	5606	NR	Cont	g/day in last week	2	25473529	25475916	12	-0.000102173	9.34e-10	NR	DNMT3A
Dugue 2019	5606	NR	Cont	g/day in last week	11	10476023	10477452	10	-0.000116213	1.06e-09	NR	AMPD3
Dugue 2019	5606	NR	Cont	g/day in last week	15	41803428	41804283	5	-0.000157522	1.48e-09	NR	LTK
Dugue 2019	5606	NR	Cont	g/day in last week	8	67834312	67835351	4	-0.00016962	1.5e-09	NR	SNHG6
Dugue 2019	5606	NR	Cont	g/day in last week	17	27048708	27050723	9	-0.000109719	1.55e-09	NR	RPL23A
Dugue 2019	5606	NR	Cont	g/day in last week	4	2819393	2820479	7	-0.000272362	1.56e-09	NR	SH3BP2
Dugue 2019	5606	NR	Cont	g/day in last week	20	2634697	2635586	5	-0.000162822	1.58e-09	NR	NOP56
Dugue 2019	5606	NR	Cont	g/day in last week	16	66994879	66995461	5	-0.000155035	1.62e-09	NR	CES3
Dugue 2019	5606	NR	Cont	g/day in last week	10	104953276	104954103	3	-0.000220068	1.83e-09	NR	NT5C2
Dugue 2019	5606	NR	Cont	g/day in last week	13	79968216	79968324	2	-0.000225444	1.87e-09	NR
Dugue 2019	5606	NR	Cont	g/day in last week	X	118921379	118922670	6	-0.000167688	1.96e-09	NR	SNORA69
Dugue 2019	5606	NR	Cont	g/day in last week	4	53010	54036	11	-9.06e-05	2.17e-09	NR	ZNF595
Dugue 2019	5606	NR	Cont	g/day in last week	11	503807	504937	8	-0.000142351	2.46e-09	NR	RNH1
Dugue 2019	5606	NR	Cont	g/day in last week	2	232259281	232261238	12	-0.000127552	2.51e-09	NR	B3GNT7
Dugue 2019	5606	NR	Cont	g/day in last week	1	200859871	200860682	6	-0.000147532	2.53e-09	NR	C1orf106
Dugue 2019	5606	NR	Cont	g/day in last week	6	31322121	31324024	19	-0.00013518	2.77e-09	NR	HLA-B
Dugue 2019	5606	NR	Cont	g/day in last week	17	74557104	74557703	4	-0.000125371	3.1e-09	NR	SNORD1B
Dugue 2019	5606	NR	Cont	g/day in last week	19	30162566	30162771	2	-0.000207511	3.4e-09	NR
Dugue 2019	5606	NR	Cont	g/day in last week	1	47905067	47906276	4	-0.000143162	4.08e-09	NR
Dugue 2019	5606	NR	Cont	g/day in last week	15	67383147	67383736	2	-0.000211253	4.16e-09	NR
Dugue 2019	5606	NR	Cont	g/day in last week	10	22622793	22624374	10	-0.000110718	4.46e-09	NR	RP11
Dugue 2019	5606	NR	Cont	g/day in last week	22	50965373	50966123	3	-0.000169617	5.01e-09	NR	SCO2
Dugue 2019	5606	NR	Cont	g/day in last week	16	8806359	8807043	13	-0.000168627	5.14e-09	NR	ABAT
Dugue 2019	5606	NR	Cont	g/day in last week	1	3239139	3239992	4	-0.000109573	5.32e-09	NR
Dugue 2019	5606	NR	Cont	g/day in last week	22	38485294	38485757	3	-0.000204848	5.55e-09	NR	BAIAP2L2
Dugue 2019	5606	NR	Cont	g/day in last week	19	52995647	52996617	5	-0.000218549	5.61e-09	NR	ZNF578
Dugue 2019	5606	NR	Cont	g/day in last week	18	11148510	11149841	13	-0.000112022	6.09e-09	NR	PIEZO2
Dugue 2019	5606	NR	Cont	g/day in last week	9	123691163	123691850	4	-0.000127049	6.41e-09	NR	TRAF1
Dugue 2019	5606	NR	Cont	g/day in last week	2	74742309	74743243	6	-0.00013627	6.65e-09	NR	TLX2
Dugue 2019	5606	NR	Cont	g/day in last week	X	70272390	70273384	7	-0.000180808	7.03e-09	NR
Dugue 2019	5606	NR	Cont	g/day in last week	15	32933661	32934185	7	-0.000146671	7.05e-09	NR	SCG5
Dugue 2019	5606	NR	Cont	g/day in last week	2	74612020	74612812	7	-0.000100032	7.98e-09	NR	DCTN1
Dugue 2019	5606	NR	Cont	g/day in last week	1	109203268	109204821	9	-0.000100576	7.99e-09	NR	HENMT1
Dugue 2019	5606	NR	Cont	g/day in last week	16	89044523	89044882	5	-0.000107502	8.1e-09	NR	CBFA2T3
Dugue 2019	5606	NR	Cont	g/day in last week	19	56147306	56148037	2	-0.000134282	8.54e-09	NR	ZNF581
Dugue 2019	5606	NR	Cont	g/day in last week	7	27141774	27143806	28	-0.000119289	8.81e-09	NR	HOXA2
Dugue 2019	5606	NR	Cont	g/day in last week	18	57566144	57566460	3	-0.000234675	9.34e-09	NR	PMAIP1
Dugue 2019	5606	NR	Cont	g/day in last week	3	181326706	181327125	3	-0.000232283	9.63e-09	NR	SOX2
Dugue 2019	5606	NR	Cont	g/day in last week	11	57408514	57408751	3	-0.000142444	1.01e-08	NR	MIR130A
Dugue 2019	5606	NR	Cont	g/day in last week	1	45241523	45244184	15	-7.15e-05	1.07e-08	NR	SNORD46
Dugue 2019	5606	NR	Cont	g/day in last week	14	74227441	74227875	3	-0.000176656	1.16e-08	NR	ELMSAN1
Dugue 2019	5606	NR	Cont	g/day in last week	5	179333932	179334739	4	-0.000111718	1.22e-08	NR	TBC1D9B
Dugue 2019	5606	NR	Cont	g/day in last week	3	9956506	9957221	5	-0.000119846	1.23e-08	NR	IL17RC
Dugue 2019	5606	NR	Cont	g/day in last week	1	1712885	1714271	7	-0.000125302	1.36e-08	NR	NADK
Dugue 2019	5606	NR	Cont	g/day in last week	1	20501558	20501757	2	-0.000185879	1.36e-08	NR	PLA2G2C
Dugue 2019	5606	NR	Cont	g/day in last week	2	16804409	16805111	4	-0.000178568	1.48e-08	NR	FAM49A
Dugue 2019	5606	NR	Cont	g/day in last week	6	31589161	31590870	18	-9e-05	1.48e-08	NR	SNORA38
Dugue 2019	5606	NR	Cont	g/day in last week	22	17090136	17091297	6	-0.000106078	1.56e-08	NR
Dugue 2019	5606	NR	Cont	g/day in last week	6	32916606	32921805	39	-7.12e-05	1.57e-08	NR	HLA-DMA
Dugue 2019	5606	NR	Cont	g/day in last week	1	6268790	6269635	6	-0.000145273	1.75e-08	NR	RNF207
Dugue 2019	5606	NR	Cont	g/day in last week	1	6419606	6420733	6	-9.82e-05	1.84e-08	NR	ACOT7
Dugue 2019	5606	NR	Cont	g/day in last week	11	67051977	67052992	5	-0.000133743	1.92e-08	NR	ADRBK1
Dugue 2019	5606	NR	Cont	g/day in last week	1	38412519	38412818	6	-0.000105002	2.02e-08	NR	INPP5B
Dugue 2019	5606	NR	Cont	g/day in last week	3	184033015	184034132	5	-0.000106748	2.04e-08	NR	EIF4G1
Dugue 2019	5606	NR	Cont	g/day in last week	X	152711731	152712221	9	-0.000144509	2.1e-08	NR	TREX2
Dugue 2019	5606	NR	Cont	g/day in last week	16	3161760	3163228	5	-0.000183033	2.18e-08	NR	ZNF205
Dugue 2019	5606	NR	Cont	g/day in last week	19	39737768	39737861	3	-0.00020812	2.23e-08	NR	IFNL4
Dugue 2019	5606	NR	Cont	g/day in last week	5	176558658	176560265	9	-0.000141857	2.41e-08	NR	NSD1
Dugue 2019	5606	NR	Cont	g/day in last week	1	3163970	3165391	8	-0.000125926	2.56e-08	NR
Dugue 2019	5606	NR	Cont	g/day in last week	21	43346184	43347094	4	-0.000110034	2.75e-08	NR	C2CD2
Dugue 2019	5606	NR	Cont	g/day in last week	8	129060815	129061665	6	-0.000151439	2.79e-08	NR	MIR1207
Dugue 2019	5606	NR	Cont	g/day in last week	6	6588089	6589075	6	-0.000127568	2.81e-08	NR	LY86
Dugue 2019	5606	NR	Cont	g/day in last week	17	33775295	33777219	16	-8.77e-05	2.85e-08	NR	SLFN13
Dugue 2019	5606	NR	Cont	g/day in last week	15	90543224	90544015	6	-0.000114613	2.88e-08	NR	ZNF710
Dugue 2019	5606	NR	Cont	g/day in last week	19	51871891	51872365	3	-0.000107319	3.04e-08	NR	CLDND2
Dugue 2019	5606	NR	Cont	g/day in last week	17	43228571	43229244	2	-0.000198384	3.09e-08	NR
Dugue 2019	5606	NR	Cont	g/day in last week	17	30591837	30592657	6	-0.000129587	3.16e-08	NR	RHBDL3
Dugue 2019	5606	NR	Cont	g/day in last week	20	31331814	31332353	6	-0.000115113	3.18e-08	NR	COMMD7
Dugue 2019	5606	NR	Cont	g/day in last week	17	79632187	79632662	5	-9.89e-05	3.41e-08	NR	CCDC137
Dugue 2019	5606	NR	Cont	g/day in last week	14	24640947	24641852	12	-0.000106047	3.54e-08	NR	REC8
Dugue 2019	5606	NR	Cont	g/day in last week	12	57624371	57624530	2	-0.000134268	3.71e-08	NR	SHMT2
Dugue 2019	5606	NR	Cont	g/day in last week	9	19378679	19379118	2	-0.00028983	3.83e-08	NR	RPS6
Dugue 2019	5606	NR	Cont	g/day in last week	19	46998383	46999840	12	-0.000131838	3.85e-08	NR	AC011484.1
Dugue 2019	5606	NR	Cont	g/day in last week	5	124070989	124071107	3	-0.000167793	4.05e-08	NR	RP11
Dugue 2019	5606	NR	Cont	g/day in last week	2	97524767	97525009	4	-0.000152848	4.09e-08	NR	ANKRD39
Dugue 2019	5606	NR	Cont	g/day in last week	9	126135169	126135998	6	-0.000201442	4.1e-08	NR
Dugue 2019	5606	NR	Cont	g/day in last week	2	179395885	179396688	5	-0.000139286	4.15e-08	NR	TTN
Dugue 2019	5606	NR	Cont	g/day in last week	19	10406935	10407538	5	-0.000180291	4.87e-08	NR
Dugue 2019	5606	NR	Cont	g/day in last week	1	27188505	27190088	11	-0.000102243	4.93e-08	NR	SFN
Dugue 2019	5606	NR	Cont	g/day in last week	4	682834	683772	6	-0.000119412	4.99e-08	NR	MFSD7
Dugue 2019	5606	NR	Cont	g/day in last week	2	241975756	241976658	5	-0.000276211	5.18e-08	NR	SNED1
Dugue 2019	5606	NR	Cont	g/day in last week	8	60032246	60032983	6	-0.000136288	5.52e-08	NR	TOX
Dugue 2019	5606	NR	Cont	g/day in last week	1	25258679	25259106	2	-0.00015612	5.57e-08	NR
Dugue 2019	5606	NR	Cont	g/day in last week	7	150021488	150021553	3	-7.84e-05	5.65e-08	NR	LRRC61
Dugue 2019	5606	NR	Cont	g/day in last week	1	51442133	51442318	2	-0.000285939	5.88e-08	NR
Dugue 2019	5606	NR	Cont	g/day in last week	17	42247565	42248358	8	-0.000127392	5.89e-08	NR	ASB16
Dugue 2019	5606	NR	Cont	g/day in last week	16	67562128	67564076	9	-8.63e-05	6.01e-08	NR	FAM65A
Dugue 2019	5606	NR	Cont	g/day in last week	6	1624386	1624720	3	-0.000205088	6.35e-08	NR	GMDS
Dugue 2019	5606	NR	Cont	g/day in last week	6	41512853	41513166	2	-0.000181376	6.68e-08	NR	FOXP4
Dugue 2019	5606	NR	Cont	g/day in last week	5	176936563	176938148	9	-0.00011812	7.48e-08	NR	DOK3
Dugue 2019	5606	NR	Cont	g/day in last week	22	30476089	30476525	11	-0.00010704	7.8e-08	NR	HORMAD2
Dugue 2019	5606	NR	Cont	g/day in last week	17	14206572	14207701	11	-0.000139705	7.94e-08	NR	RP11
Dugue 2019	5606	NR	Cont	g/day in last week	7	116138462	116140342	16	-0.000104151	8.52e-08	NR	CAV2
Dugue 2019	5606	NR	Cont	g/day in last week	6	26195910	26197071	7	-0.000220443	8.81e-08	NR	HIST1H3D
Dugue 2019	5606	NR	Cont	g/day in last week	14	73703023	73703193	2	-0.000132404	8.94e-08	NR	PAPLN
Dugue 2019	5606	NR	Cont	g/day in last week	12	46663407	46664096	4	-0.000152491	9.34e-08	NR	SLC38A1
Dugue 2019	5606	NR	Cont	g/day in last week	11	61062205	61063144	12	-6.24e-05	9.44e-08	NR	VWCE
Dugue 2019	5606	NR	Cont	g/day in last week	17	7461260	7462249	7	-0.00012406	9.57e-08	NR	TNFSF13
Perrier 2019	450	NR	Cont	no of drinks	8	144635260	144636462	9	0.0060; 0.020	NR	4.7e-14	GSDMD
Perrier 2019	450	NR	Cont	no of drinks	6	31650735	31651362	21	0.0049; 0.018	NR	1.8e-13
Perrier 2019	450	NR	Cont	no of drinks	7	99516603	99517509	14	-0.0007; 0.018	NR	3e-06	TRIM4
Perrier 2019	450	NR	Cont	no of drinks	19	11517079	11517436	5	0.0041; 0.020	NR	3.3e-06	RGL3
Perrier 2019	450	NR	Cont	no of drinks	20	61446962	61447992	32	-0.0004; -0.012	NR	4.8e-06	COL9A3
Perrier 2019	450	NR	Cont	no of drinks	8	38964500	38965492	10	0.0019; 0.014	NR	0.00013	ADAM32
Perrier 2019	450	NR	Cont	no of drinks	21	47604052	47605174	8	0.0191; 0.032	NR	0.00015	C21orf56
Perrier 2019	450	NR	Cont	no of drinks	2	118616155	118616576	5	0.0143; 0.019	NR	0.00019
Perrier 2019	450	NR	Cont	no of drinks	14	24780404	24780926	10	-0.0031; -0.012	NR	0.00023	LTB4R2, LTB4R, CIDEB
Perrier 2019	450	NR	Cont	no of drinks	11	457256	457304	3	0.0044; 0.011	NR	0.0003	PTDSS2
Perrier 2019	450	NR	Cont	no of drinks	22	45808669	45810043	16	0.0009; 0.019	NR	0.0003	SMC1B, RIBC2
Perrier 2019	450	NR	Cont	no of drinks	10	72013286	72013397	2	-0.0087; -0.014	NR	0.00084
Perrier 2019	450	NR	Cont	no of drinks	14	103366987	103367858	5	-0.0044; 0.013	NR	0.0014	TRAF3
Perrier 2019	450	NR	Cont	no of drinks	22	31317764	31318546	12	0.0016; 0.015	NR	0.0014	C22orf27
Perrier 2019	450	NR	Cont	no of drinks	1	153599479	153600156	8	0.0076; 0.019	NR	0.003	S100A13, S100A1
Perrier 2019	450	NR	Cont	no of drinks	6	31760521	31761076	12	0.0012; 0.007	NR	0.0031	VARS
Perrier 2019	450	NR	Cont	no of drinks	13	20781097	20781165	3	0.0071; 0.011	NR	0.0032
Perrier 2019	450	NR	Cont	no of drinks	6	5783800	5783863	2	-0.0038; 0.016	NR	0.0033
Perrier 2019	450	NR	Cont	no of drinks	19	19625761	19626599	6	0.0034; 0.010	NR	0.0038	TSSK6, NDUFA13
Perrier 2019	450	NR	Cont	no of drinks	6	27637302	27637537	4	0.0056; 0.014	NR	0.0039
Perrier 2019	450	NR	Cont	no of drinks	3	9404422	9405070	9	0.0045; 0.013	NR	0.0045	THUMPD3
Perrier 2019	450	NR	Cont	no of drinks	8	23562918	23564294	12	0.0006; 0.011	NR	0.0049	NKX2-6
Perrier 2019	450	NR	Cont	no of drinks	3	10370264	10370704	4	0.0069; 0.010	NR	0.0055	ATP2B2
Perrier 2019	450	NR	Cont	no of drinks	6	30094947	30095802	26	-0.0014; -0.011	NR	0.0055
Perrier 2019	450	NR	Cont	no of drinks	19	47287778	47288263	6	-0.0024; -0.008	NR	0.0055	SLC1A5
Perrier 2019	450	NR	Cont	no of drinks	1	1486986	1487605	5	0.0018; 0.014	NR	0.0057	PCSK4
Perrier 2019	450	NR	Cont	no of drinks	1	209979111	209979779	8	-0.0044; -0.021	NR	0.0057	IRF6
Perrier 2019	450	NR	Cont	no of drinks	7	31726494	31726912	6	-0.0038; -0.014	NR	0.0061	C7orf16
Perrier 2019	450	NR	Cont	no of drinks	22	50924745	50925337	5	0.0015; 0.015	NR	0.0063	ADM2, MIOX
Perrier 2019	450	NR	Cont	no of drinks	10	76803669	76803925	3	0.0043; 0.009	NR	0.0064	DUPD1
Perrier 2019	450	NR	Cont	no of drinks	1	150670196	150670422	2	0.0078; 0.023	NR	0.0069	GOLPH3L
Perrier 2019	450	NR	Cont	no of drinks	5	126408756	126409573	13	0.0012; 0.017	NR	0.0074	FLJ44606
Perrier 2019	450	NR	Cont	no of drinks	2	132558939	132559484	6	-0.0006; -0.015	NR	0.0074	C2orf27B
Perrier 2019	450	NR	Cont	no of drinks	7	157294107	157294502	5	-0.0007; 0.014	NR	0.0076
Perrier 2019	450	NR	Cont	no of drinks	5	125930870	125931275	6	0.0035; 0.012	NR	0.0079	ALDH7A1
Perrier 2019	450	NR	Cont	no of drinks	4	3449663	3449904	3	-0.0022; 0.013	NR	0.0086	HGFAC
Perrier 2019	450	NR	Cont	no of drinks	2	129494526	129494877	4	-0.0007; -0.007	NR	0.0087
Perrier 2019	450	NR	Cont	no of drinks	6	29599012	29599390	10	0.0023; 0.008	NR	0.0089	GABBR1
Perrier 2019	450	NR	Cont	no of drinks	8	145638202	145639181	5	0.0003; 0.015	NR	0.0089	SLC39A4
Perrier 2019	450	NR	Cont	no of drinks	11	8361190	8361530	3	0.0143; 0.016	NR	0.0089
Perrier 2019	450	NR	Cont	no of drinks	17	36997449	36997740	5	0.0103; 0.015	NR	0.0089	C17orf98
Perrier 2019	450	NR	Cont	no of drinks	11	128557481	128557965	3	-0.0039; -0.010	NR	0.0096
Perrier 2019	450	NR	Cont	no of drinks	2	98340425	98340921	4	0.0041; 0.017	NR	0.011	ZAP70
Perrier 2019	450	NR	Cont	no of drinks	12	132270218	132270829	4	0.0004; -0.014	NR	0.012	SFRS8
Perrier 2019	450	NR	Cont	no of drinks	2	91847976	91848218	8	-0.0004; -0.009	NR	0.012	LOC654342
Perrier 2019	450	NR	Cont	no of drinks	1	45242073	45242356	3	-0.0056; -0.009	NR	0.013	SNORD46, RPS8, SNORD38A
Perrier 2019	450	NR	Cont	no of drinks	5	80493	80900	2	-0.0068; 0.024	NR	0.013
Perrier 2019	450	NR	Cont	no of drinks	22	50165244	50165512	3	-0.0066; -0.016	NR	0.014
Perrier 2019	450	NR	Cont	no of drinks	21	40985387	40985406	2	0.0009; 0.011	NR	0.015	C21orf88
Perrier 2019	450	NR	Cont	no of drinks	6	32120623	32121261	23	0.0011; -0.012	NR	0.015	PPT2, PRRT1
Perrier 2019	450	NR	Cont	no of drinks	6	167559913	167560727	4	-0.0107; -0.017	NR	0.016
Perrier 2019	450	NR	Cont	no of drinks	10	128076910	128076941	3	0.0042; 0.010	NR	0.016	ADAM12
Perrier 2019	450	NR	Cont	no of drinks	13	110521956	110522297	5	-0.0055; -0.020	NR	0.017
Perrier 2019	450	NR	Cont	no of drinks	5	161494015	161494307	3	-0.0036; 0.017	NR	0.017	GABRG2
Perrier 2019	450	NR	Cont	no of drinks	11	289774	290292	4	0.0073; 0.029	NR	0.017	ATHL1
Perrier 2019	450	NR	Cont	no of drinks	19	51171061	51171247	2	0.0078; 0.014	NR	0.017	SHANK1
Perrier 2019	450	NR	Cont	no of drinks	3	187388128	187388281	4	0.0005; 0.010	NR	0.017	SST
Perrier 2019	450	NR	Cont	no of drinks	3	13114343	13114803	6	0.0008; -0.013	NR	0.018	IQSEC1
Perrier 2019	450	NR	Cont	no of drinks	15	96911165	96911531	2	0.0063; 0.007	NR	0.018
Perrier 2019	450	NR	Cont	no of drinks	18	14747888	14748298	9	-0.0022; -0.013	NR	0.019	ANKRD30B
Perrier 2019	450	NR	Cont	no of drinks	X	48814580	48815125	9	-0.0003; -0.006	NR	0.02	OTUD5
Perrier 2019	450	NR	Cont	no of drinks	16	82044738	82045183	7	0.0053; 0.012	NR	0.021	SDR42E1
Perrier 2019	450	NR	Cont	no of drinks	15	74427234	74427499	3	-0.0073; 0.010	NR	0.023	ISLR2
Perrier 2019	450	NR	Cont	no of drinks	3	37033625	37033903	5	0.0017; -0.013	NR	0.024	EPM2AIP1, MLH1
Perrier 2019	450	NR	Cont	no of drinks	21	44253516	44253611	2	0.0069; 0.008	NR	0.025
Perrier 2019	450	NR	Cont	no of drinks	13	24144483	24144985	6	0.0017; 0.011	NR	0.025	TNFRSF19
Perrier 2019	450	NR	Cont	no of drinks	5	180541684	180541897	3	0.0053; 0.012	NR	0.026
Perrier 2019	450	NR	Cont	no of drinks	12	113592319	113592619	4	-0.0017; -0.008	NR	0.03	CCDC42B
Perrier 2019	450	NR	Cont	no of drinks	22	20783497	20783963	3	0.0077; 0.015	NR	0.031	SCARF2
Perrier 2019	450	NR	Cont	no of drinks	19	55953951	55953996	2	0.0040; 0.016	NR	0.032	SHISA7
Perrier 2019	450	NR	Cont	no of drinks	6	163746113	163746175	2	0.0084; 0.012	NR	0.033	LOC285796
Perrier 2019	450	NR	Cont	no of drinks	20	30225517	30225851	6	0.0043; 0.009	NR	0.033	COX4I2
Perrier 2019	450	NR	Cont	no of drinks	16	3062597	3062975	4	-0.0044; -0.008	NR	0.034	CLDN9
Perrier 2019	450	NR	Cont	no of drinks	7	1896154	1896220	2	0.0087; 0.012	NR	0.034	MAD1L1
Perrier 2019	450	NR	Cont	no of drinks	3	122281881	122281975	3	-0.0029; -0.011	NR	0.035	PARP9, DTX3L
Perrier 2019	450	NR	Cont	no of drinks	1	2058417	2058790	2	-0.0121; -0.016	NR	0.035	PRKCZ
Perrier 2019	450	NR	Cont	no of drinks	12	54402431	54402717	7	0.0039; 0.018	NR	0.036	HOXC8
Perrier 2019	450	NR	Cont	no of drinks	15	35086890	35086985	4	0.0028; 0.012	NR	0.036	ACTC1
Perrier 2019	450	NR	Cont	no of drinks	11	2322500	2323083	13	0.0011; 0.010	NR	0.037	C11orf21, TSPAN32
Perrier 2019	450	NR	Cont	no of drinks	6	168197699	168197983	4	0.0011; -0.014	NR	0.039	C6orf123
Perrier 2019	450	NR	Cont	no of drinks	6	41376604	41376993	3	-0.0049; -0.014	NR	0.04
Perrier 2019	450	NR	Cont	no of drinks	17	38928324	38928380	2	0.0015; 0.022	NR	0.041	KRT26
Perrier 2019	450	NR	Cont	no of drinks	11	2292890	2293117	8	0.0008; -0.011	NR	0.043	ASCL2
Perrier 2019	450	NR	Cont	no of drinks	1	152595322	152595351	2	-0.0111; -0.012	NR	0.044	LCE3A
Perrier 2019	450	NR	Cont	no of drinks	12	130822603	130822674	3	-0.0131; -0.025	NR	0.045	PIWIL1
Perrier 2019	450	NR	Cont	no of drinks	1	53163523	53163758	3	-0.0030; 0.008	NR	0.045	C1orf163
Perrier 2019	450	NR	Cont	no of drinks	19	48675305	48676053	2	-0.0022; 0.006	NR	0.047
Perrier 2019	450	NR	Cont	no of drinks	1	15541182	15541349	4	-0.0015; 0.008	NR	0.048	TMEM51
Perrier 2019	450	NR	Cont	no of drinks	12	49319500	49319673	3	0.0022; 0.007	NR	0.049	FKBP11
Perrier 2019	450	NR	Cont	no of drinks	15	45028083	45028098	2	-0.0034; -0.004	NR	0.05	TRIM69

## Sheet: S9
Supplementary Table 9: KEGG (Kyoto Encyclopedia of Genes and Genomes) pathways and GO (Gene Ontology) pathways associated with identified DMP in Dugue et al.
Study	n	Ethnicity	Variable type	Variable	Collection	Pathway entry	Pathway name	Ont	N	DE	P.DE	FDR
Dugue 2019	5606	NR	Cont	g/day overlifetime	KEGG pathway	path:hsa04810	Regulation of actin cytoskeleton	NA	207	10	0.00104752	0.343588
Dugue 2019	5606	NR	Cont	g/day overlifetime	KEGG pathway	path:hsa01230	Biosynthesis of amino acids	NA	70	5	0.00389643	0.639014
Dugue 2019	5606	NR	Cont	g/day overlifetime	KEGG pathway	path:hsa04611	Platelet activation	NA	123	6	0.0103029	0.742212
Dugue 2019	5606	NR	Cont	g/day overlifetime	KEGG pathway	path:hsa00430	Taurine and hypotaurine metabolism	NA	11	2	0.0112667	0.742212
Dugue 2019	5606	NR	Cont	g/day overlifetime	KEGG pathway	path:hsa03010	Ribosome	NA	131	6	0.013768	0.742212
Dugue 2019	5606	NR	Cont	g/day overlifetime	KEGG pathway	path:hsa03450	Non-homologous end-joining	NA	13	2	0.0156688	0.742212
Dugue 2019	5606	NR	Cont	g/day overlifetime	KEGG pathway	path:hsa03030	DNA replication	NA	36	3	0.0164511	0.742212
Dugue 2019	5606	NR	Cont	g/day overlifetime	KEGG pathway	path:hsa00533	Glycosaminoglycan biosynthesis - keratan sulfate	NA	14	2	0.0181027	0.742212
Dugue 2019	5606	NR	Cont	g/day overlifetime	KEGG pathway	path:hsa04670	Leukocyte transendothelial migration	NA	110	5	0.0246312	0.74311
Dugue 2019	5606	NR	Cont	g/day overlifetime	KEGG pathway	path:hsa01210	2-Oxocarboxylic acid metabolism	NA	17	2	0.0262758	0.74311
Dugue 2019	5606	NR	Cont	g/day overlifetime	KEGG pathway	path:hsa00970	Aminoacyl-tRNA biosynthesis	NA	44	3	0.0279996	0.74311
Dugue 2019	5606	NR	Cont	g/day overlifetime	KEGG pathway	path:hsa05203	Viral carcinogenesis	NA	198	7	0.0291627	0.74311
Dugue 2019	5606	NR	Cont	g/day overlifetime	KEGG pathway	path:hsa01521	EGFR tyrosine kinase inhibitor resistance	NA	78	4	0.0294525	0.74311
Dugue 2019	5606	NR	Cont	g/day overlifetime	KEGG pathway	path:hsa04010	MAPK signaling pathway	NA	294	9	0.0322853	0.756399
Dugue 2019	5606	NR	Cont	g/day overlifetime	KEGG pathway	path:hsa00220	Arginine biosynthesis	NA	20	2	0.0356559	0.779677
Dugue 2019	5606	NR	Cont	g/day overlifetime	KEGG pathway	path:hsa04727	GABAergic synapse	NA	88	4	0.0430237	0.881987
Dugue 2019	5606	NR	Cont	g/day in last week	KEGG pathway	path:hsa05220	Chronic myeloid leukemia	NA	76	13	0.000138668	0.0433594
Dugue 2019	5606	NR	Cont	g/day in last week	KEGG pathway	path:hsa03010	Ribosome	NA	131	17	0.000458027	0.0433594
Dugue 2019	5606	NR	Cont	g/day in last week	KEGG pathway	path:hsa00533	Glycosaminoglycan biosynthesis - keratan sulfate	NA	14	5	0.000522558	0.0433594
Dugue 2019	5606	NR	Cont	g/day in last week	KEGG pathway	path:hsa04218	Cellular senescence	NA	157	19	0.000528773	0.0433594
Dugue 2019	5606	NR	Cont	g/day in last week	KEGG pathway	path:hsa04010	MAPK signaling pathway	NA	294	29	0.000711326	0.046663
Dugue 2019	5606	NR	Cont	g/day in last week	KEGG pathway	path:hsa04070	Phosphatidylinositol signaling system	NA	99	13	0.00188155	0.0759341
Dugue 2019	5606	NR	Cont	g/day in last week	KEGG pathway	path:hsa04371	Apelin signaling pathway	NA	136	16	0.00193041	0.0759341
Dugue 2019	5606	NR	Cont	g/day in last week	KEGG pathway	path:hsa04022	cGMP-PKG signaling pathway	NA	162	18	0.00198406	0.0759341
Dugue 2019	5606	NR	Cont	g/day in last week	KEGG pathway	path:hsa04210	Apoptosis	NA	137	16	0.00208356	0.0759341
Dugue 2019	5606	NR	Cont	g/day in last week	KEGG pathway	path:hsa04722	Neurotrophin signaling pathway	NA	119	14	0.00362895	0.119029
Dugue 2019	5606	NR	Cont	g/day in last week	KEGG pathway	path:hsa05167	Kaposi's sarcoma-associated herpesvirus infection	NA	176	18	0.00488354	0.137654
Dugue 2019	5606	NR	Cont	g/day in last week	KEGG pathway	path:hsa04971	Gastric acid secretion	NA	75	10	0.00548287	0.137654
Dugue 2019	5606	NR	Cont	g/day in last week	KEGG pathway	path:hsa05212	Pancreatic cancer	NA	75	10	0.00548287	0.137654
Dugue 2019	5606	NR	Cont	g/day in last week	KEGG pathway	path:hsa04810	Regulation of actin cytoskeleton	NA	207	20	0.00587548	0.137654
Dugue 2019	5606	NR	Cont	g/day in last week	KEGG pathway	path:hsa05223	Non-small cell lung cancer	NA	66	9	0.00712309	0.155758
Dugue 2019	5606	NR	Cont	g/day in last week	KEGG pathway	path:hsa05203	Viral carcinogenesis	NA	198	19	0.00769593	0.157767
Dugue 2019	5606	NR	Cont	g/day in last week	KEGG pathway	path:hsa05416	Viral myocarditis	NA	56	8	0.00828977	0.159944
Dugue 2019	5606	NR	Cont	g/day in last week	KEGG pathway	path:hsa04920	Adipocytokine signaling pathway	NA	69	9	0.009504	0.173184
Dugue 2019	5606	NR	Cont	g/day in last week	KEGG pathway	path:hsa04611	Platelet activation	NA	123	13	0.0120384	0.207821
Dugue 2019	5606	NR	Cont	g/day in last week	KEGG pathway	path:hsa00562	Inositol phosphate metabolism	NA	73	9	0.0135576	0.222345
Dugue 2019	5606	NR	Cont	g/day in last week	KEGG pathway	path:hsa05100	Bacterial invasion of epithelial cells	NA	74	9	0.0147456	0.230313
Dugue 2019	5606	NR	Cont	g/day in last week	KEGG pathway	path:hsa04724	Glutamatergic synapse	NA	114	12	0.0159837	0.238302
Dugue 2019	5606	NR	Cont	g/day in last week	KEGG pathway	path:hsa01521	EGFR tyrosine kinase inhibitor resistance	NA	78	9	0.020274	0.286428
Dugue 2019	5606	NR	Cont	g/day in last week	KEGG pathway	path:hsa04659	Th17 cell differentiation	NA	105	11	0.0212615	0.286428
Dugue 2019	5606	NR	Cont	g/day in last week	KEGG pathway	path:hsa04720	Long-term potentiation	NA	67	8	0.0231536	0.286428
Dugue 2019	5606	NR	Cont	g/day in last week	KEGG pathway	path:hsa05166	HTLV-I infection	NA	252	21	0.023458	0.286428
Dugue 2019	5606	NR	Cont	g/day in last week	KEGG pathway	path:hsa04931	Insulin resistance	NA	107	11	0.0241073	0.286428
Dugue 2019	5606	NR	Cont	g/day in last week	KEGG pathway	path:hsa04270	Vascular smooth muscle contraction	NA	121	12	0.0244512	0.286428
Dugue 2019	5606	NR	Cont	g/day in last week	KEGG pathway	path:hsa04612	Antigen processing and presentation	NA	69	8	0.0271308	0.306859
Dugue 2019	5606	NR	Cont	g/day in last week	KEGG pathway	path:hsa04014	Ras signaling pathway	NA	230	19	0.0326507	0.343492
Dugue 2019	5606	NR	Cont	g/day in last week	KEGG pathway	path:hsa04062	Chemokine signaling pathway	NA	185	16	0.0331867	0.343492
Dugue 2019	5606	NR	Cont	g/day in last week	KEGG pathway	path:hsa05330	Allograft rejection	NA	35	5	0.0343361	0.343492
Dugue 2019	5606	NR	Cont	g/day in last week	KEGG pathway	path:hsa05205	Proteoglycans in cancer	NA	201	17	0.0345586	0.343492
Dugue 2019	5606	NR	Cont	g/day in last week	KEGG pathway	path:hsa03040	Spliceosome	NA	130	12	0.0396727	0.360949
Dugue 2019	5606	NR	Cont	g/day in last week	KEGG pathway	path:hsa04919	Thyroid hormone signaling pathway	NA	116	11	0.0404038	0.360949
Dugue 2019	5606	NR	Cont	g/day in last week	KEGG pathway	path:hsa05332	Graft-versus-host disease	NA	37	5	0.0423686	0.360949
Dugue 2019	5606	NR	Cont	g/day in last week	KEGG pathway	path:hsa04213	Longevity regulating pathway - multiple species	NA	62	7	0.0425069	0.360949
Dugue 2019	5606	NR	Cont	g/day in last week	KEGG pathway	path:hsa04071	Sphingolipid signaling pathway	NA	117	11	0.0425953	0.360949
Dugue 2019	5606	NR	Cont	g/day in last week	KEGG pathway	path:hsa03015	mRNA surveillance pathway	NA	89	9	0.0429177	0.360949
Dugue 2019	5606	NR	Cont	g/day in last week	KEGG pathway	path:hsa05200	Pathways in cancer	NA	515	36	0.0450985	0.369454
Dugue 2019	5606	NR	Cont	g/day in last week	KEGG pathway	path:hsa04152	AMPK signaling pathway	NA	119	11	0.0472215	0.369454
Dugue 2019	5606	NR	Cont	g/day in last week	KEGG pathway	path:hsa05131	Shigellosis	NA	64	7	0.0491735	0.369454
Dugue 2019	5606	NR	Cont	g/day overlifetime	GO pathway	GO:0015175	neutral amino acid transmembrane transporter activity	MF	33	5	8.14e-05	0.266439
Dugue 2019	5606	NR	Cont	g/day overlifetime	GO pathway	GO:1905039	carboxylic acid transmembrane transport	BP	102	8	8.17e-05	0.266439
Dugue 2019	5606	NR	Cont	g/day overlifetime	GO pathway	GO:0019530	taurine metabolic process	BP	7	3	8.61e-05	0.266439
Dugue 2019	5606	NR	Cont	g/day overlifetime	GO pathway	GO:0019694	alkanesulfonate metabolic process	BP	7	3	8.61e-05	0.266439
Dugue 2019	5606	NR	Cont	g/day overlifetime	GO pathway	GO:0043484	regulation of RNA splicing	BP	105	8	0.0001	0.266439
Dugue 2019	5606	NR	Cont	g/day overlifetime	GO pathway	GO:0003723	RNA binding	MF	1581	40	0.000117	0.266439
Dugue 2019	5606	NR	Cont	g/day overlifetime	GO pathway	GO:0006268	DNA unwinding involved in DNA replication	BP	8	3	0.000136	0.266439
Dugue 2019	5606	NR	Cont	g/day overlifetime	GO pathway	GO:0098505	G-rich strand telomeric DNA binding	MF	8	3	0.000136	0.266439
Dugue 2019	5606	NR	Cont	g/day overlifetime	GO pathway	GO:0043227	membrane-bounded organelle	CC	11887	190	0.000139	0.266439
Dugue 2019	5606	NR	Cont	g/day overlifetime	GO pathway	GO:1903825	organic acid transmembrane transport	BP	112	8	0.000158	0.266439
Dugue 2019	5606	NR	Cont	g/day overlifetime	GO pathway	GO:0044422	organelle part	CC	8707	148	0.000176	0.266439
Dugue 2019	5606	NR	Cont	g/day overlifetime	GO pathway	GO:0031315	extrinsic component of mitochondrial outer membrane	CC	2	2	0.000188	0.266439
Dugue 2019	5606	NR	Cont	g/day overlifetime	GO pathway	GO:0044446	intracellular organelle part	CC	8502	145	0.000194	0.266439
Dugue 2019	5606	NR	Cont	g/day overlifetime	GO pathway	GO:0005488	binding	MF	13850	213	0.000204	0.266439
Dugue 2019	5606	NR	Cont	g/day overlifetime	GO pathway	GO:0031974	membrane-enclosed lumen	CC	4828	92	0.000209	0.266439
Dugue 2019	5606	NR	Cont	g/day overlifetime	GO pathway	GO:0043233	organelle lumen	CC	4828	92	0.000209	0.266439
Dugue 2019	5606	NR	Cont	g/day overlifetime	GO pathway	GO:0070013	intracellular organelle lumen	CC	4828	92	0.000209	0.266439
Dugue 2019	5606	NR	Cont	g/day overlifetime	GO pathway	GO:0005515	protein binding	MF	10696	174	0.00022	0.266439
Dugue 2019	5606	NR	Cont	g/day overlifetime	GO pathway	GO:0000027	ribosomal large subunit assembly	BP	23	4	0.000251	0.287725
Dugue 2019	5606	NR	Cont	g/day overlifetime	GO pathway	GO:0031981	nuclear lumen	CC	3818	76	0.000265	0.28931
Dugue 2019	5606	NR	Cont	g/day overlifetime	GO pathway	GO:0043047	single-stranded telomeric DNA binding	MF	10	3	0.000286	0.297275
Dugue 2019	5606	NR	Cont	g/day overlifetime	GO pathway	GO:0007160	cell-matrix adhesion	BP	196	10	0.000392	0.388394
Dugue 2019	5606	NR	Cont	g/day overlifetime	GO pathway	GO:0098847	sequence-specific single stranded DNA binding	MF	12	3	0.000514	0.434037
Dugue 2019	5606	NR	Cont	g/day overlifetime	GO pathway	GO:0016071	mRNA metabolic process	BP	684	21	0.000515	0.434037
Dugue 2019	5606	NR	Cont	g/day overlifetime	GO pathway	GO:0060249	anatomical structure homeostasis	BP	363	14	0.000521	0.434037
Dugue 2019	5606	NR	Cont	g/day overlifetime	GO pathway	GO:0051270	regulation of cellular component movement	BP	785	23	0.000536	0.434037
Dugue 2019	5606	NR	Cont	g/day overlifetime	GO pathway	GO:0043229	intracellular organelle	CC	11852	187	0.000543	0.434037
Dugue 2019	5606	NR	Cont	g/day overlifetime	GO pathway	GO:0048015	phosphatidylinositol-mediated signaling	BP	205	10	0.000557	0.434037
Dugue 2019	5606	NR	Cont	g/day overlifetime	GO pathway	GO:0048017	inositol lipid-mediated signaling	BP	208	10	0.000624	0.469145
Dugue 2019	5606	NR	Cont	g/day overlifetime	GO pathway	GO:0030374	ligand-dependent nuclear receptor transcription coactivator activity	MF	51	5	0.000659	0.479401
Dugue 2019	5606	NR	Cont	g/day overlifetime	GO pathway	GO:0016197	endosomal transport	BP	254	11	0.000806	0.556931
Dugue 2019	5606	NR	Cont	g/day overlifetime	GO pathway	GO:1902475	L-alpha-amino acid transmembrane transport	BP	31	4	0.000817	0.556931
Dugue 2019	5606	NR	Cont	g/day overlifetime	GO pathway	GO:0015179	L-amino acid transmembrane transporter activity	MF	54	5	0.000858	0.557316
Dugue 2019	5606	NR	Cont	g/day overlifetime	GO pathway	GO:0043226	organelle	CC	12810	198	0.000882	0.557316
Dugue 2019	5606	NR	Cont	g/day overlifetime	GO pathway	GO:0044428	nuclear part	CC	4170	79	0.00092	0.557316
Dugue 2019	5606	NR	Cont	g/day overlifetime	GO pathway	GO:2000145	regulation of cell motility	BP	717	21	0.00094	0.557316
Dugue 2019	5606	NR	Cont	g/day overlifetime	GO pathway	GO:0046942	carboxylic acid transport	BP	300	12	0.000945	0.557316
Dugue 2019	5606	NR	Cont	g/day overlifetime	GO pathway	GO:0005829	cytosol	CC	4712	87	0.001022	0.561783
Dugue 2019	5606	NR	Cont	g/day overlifetime	GO pathway	GO:0042162	telomeric DNA binding	MF	33	4	0.00104	0.561783
Dugue 2019	5606	NR	Cont	g/day overlifetime	GO pathway	GO:0030335	positive regulation of cell migration	BP	390	14	0.001045	0.561783
Dugue 2019	5606	NR	Cont	g/day overlifetime	GO pathway	GO:0050847	progesterone receptor signaling pathway	BP	4	2	0.001107	0.561783
Dugue 2019	5606	NR	Cont	g/day overlifetime	GO pathway	GO:0004095	carnitine O-palmitoyltransferase activity	MF	4	2	0.001107	0.561783
Dugue 2019	5606	NR	Cont	g/day overlifetime	GO pathway	GO:0008532	N-acetyllactosaminide beta-1,3-N-acetylglucosaminyltransferase activity	MF	4	2	0.001107	0.561783
Dugue 2019	5606	NR	Cont	g/day overlifetime	GO pathway	GO:0038179	neurotrophin signaling pathway	BP	34	4	0.001166	0.561797
Dugue 2019	5606	NR	Cont	g/day overlifetime	GO pathway	GO:0005622	intracellular	CC	13844	210	0.001176	0.561797
Dugue 2019	5606	NR	Cont	g/day overlifetime	GO pathway	GO:0015849	organic acid transport	BP	308	12	0.001185	0.561797
Dugue 2019	5606	NR	Cont	g/day overlifetime	GO pathway	GO:1902001	fatty acid transmembrane transport	BP	16	3	0.001256	0.571013
Dugue 2019	5606	NR	Cont	g/day overlifetime	GO pathway	GO:0032211	negative regulation of telomere maintenance via telomerase	BP	16	3	0.001256	0.571013
Dugue 2019	5606	NR	Cont	g/day overlifetime	GO pathway	GO:0016477	cell migration	BP	1215	30	0.001318	0.586705
Dugue 2019	5606	NR	Cont	g/day overlifetime	GO pathway	GO:0046907	intracellular transport	BP	1676	38	0.001441	0.628762
Dugue 2019	5606	NR	Cont	g/day overlifetime	GO pathway	GO:2000147	positive regulation of cell motility	BP	405	14	0.001492	0.638374
Dugue 2019	5606	NR	Cont	g/day overlifetime	GO pathway	GO:0001894	tissue homeostasis	BP	195	9	0.001537	0.644693
Dugue 2019	5606	NR	Cont	g/day overlifetime	GO pathway	GO:0015804	neutral amino acid transport	BP	37	4	0.001608	0.644795
Dugue 2019	5606	NR	Cont	g/day overlifetime	GO pathway	GO:0048870	cell motility	BP	1344	32	0.001634	0.644795
Dugue 2019	5606	NR	Cont	g/day overlifetime	GO pathway	GO:0051674	localization of cell	BP	1344	32	0.001634	0.644795
Dugue 2019	5606	NR	Cont	g/day overlifetime	GO pathway	GO:0007229	integrin-mediated signaling pathway	BP	92	6	0.001685	0.644795
Dugue 2019	5606	NR	Cont	g/day overlifetime	GO pathway	GO:0006614	SRP-dependent cotranslational protein targeting to membrane	BP	92	6	0.001685	0.644795
Dugue 2019	5606	NR	Cont	g/day overlifetime	GO pathway	GO:0016416	O-palmitoyltransferase activity	MF	5	2	0.001829	0.687865
Dugue 2019	5606	NR	Cont	g/day overlifetime	GO pathway	GO:0051272	positive regulation of cellular component movement	BP	415	14	0.001872	0.688452
Dugue 2019	5606	NR	Cont	g/day overlifetime	GO pathway	GO:0014065	phosphatidylinositol 3-kinase signaling	BP	163	8	0.001894	0.688452
Dugue 2019	5606	NR	Cont	g/day overlifetime	GO pathway	GO:0015807	L-amino acid transport	BP	65	5	0.001984	0.709654
Dugue 2019	5606	NR	Cont	g/day overlifetime	GO pathway	GO:0009892	negative regulation of metabolic process	BP	2676	54	0.002018	0.710082
Dugue 2019	5606	NR	Cont	g/day overlifetime	GO pathway	GO:0001952	regulation of cell-matrix adhesion	BP	96	6	0.002093	0.724827
Dugue 2019	5606	NR	Cont	g/day overlifetime	GO pathway	GO:0030334	regulation of cell migration	BP	666	19	0.0022	0.740409
Dugue 2019	5606	NR	Cont	g/day overlifetime	GO pathway	GO:0006613	cotranslational protein targeting to membrane	BP	97	6	0.002206	0.740409
Dugue 2019	5606	NR	Cont	g/day overlifetime	GO pathway	GO:0016482	cytosolic transport	BP	133	7	0.002436	0.770684
Dugue 2019	5606	NR	Cont	g/day overlifetime	GO pathway	GO:0048025	negative regulation of mRNA splicing, via spliceosome	BP	20	3	0.002456	0.770684
Dugue 2019	5606	NR	Cont	g/day overlifetime	GO pathway	GO:0031210	phosphatidylcholine binding	MF	20	3	0.002456	0.770684
Dugue 2019	5606	NR	Cont	g/day overlifetime	GO pathway	GO:0050997	quaternary ammonium group binding	MF	20	3	0.002456	0.770684
Dugue 2019	5606	NR	Cont	g/day overlifetime	GO pathway	GO:0043231	intracellular membrane-bounded organelle	CC	10188	162	0.00253	0.770684
Dugue 2019	5606	NR	Cont	g/day overlifetime	GO pathway	GO:0003333	amino acid transmembrane transport	BP	69	5	0.002583	0.770684
Dugue 2019	5606	NR	Cont	g/day overlifetime	GO pathway	GO:0048024	regulation of mRNA splicing, via spliceosome	BP	69	5	0.002583	0.770684
Dugue 2019	5606	NR	Cont	g/day overlifetime	GO pathway	GO:0044238	primary metabolic process	BP	9967	159	0.002587	0.770684
Dugue 2019	5606	NR	Cont	g/day overlifetime	GO pathway	GO:0044424	intracellular part	CC	13560	205	0.002677	0.770684
Dugue 2019	5606	NR	Cont	g/day overlifetime	GO pathway	GO:0045047	protein targeting to ER	BP	101	6	0.002704	0.770684
Dugue 2019	5606	NR	Cont	g/day overlifetime	GO pathway	GO:0016406	carnitine O-acyltransferase activity	MF	6	2	0.002719	0.770684
Dugue 2019	5606	NR	Cont	g/day overlifetime	GO pathway	GO:0040012	regulation of locomotion	BP	783	21	0.002738	0.770684
Dugue 2019	5606	NR	Cont	g/day overlifetime	GO pathway	GO:0040017	positive regulation of locomotion	BP	433	14	0.002756	0.770684
Dugue 2019	5606	NR	Cont	g/day overlifetime	GO pathway	GO:0050732	negative regulation of peptidyl-tyrosine phosphorylation	BP	43	4	0.002817	0.777984
Dugue 2019	5606	NR	Cont	g/day overlifetime	GO pathway	GO:0005925	focal adhesion	CC	389	13	0.00292	0.795509
Dugue 2019	5606	NR	Cont	g/day overlifetime	GO pathway	GO:0006865	amino acid transport	BP	138	7	0.002996	0.795509
Dugue 2019	5606	NR	Cont	g/day overlifetime	GO pathway	GO:0044282	small molecule catabolic process	BP	345	12	0.003039	0.795509
Dugue 2019	5606	NR	Cont	g/day overlifetime	GO pathway	GO:0044237	cellular metabolic process	BP	10072	160	0.003042	0.795509
Dugue 2019	5606	NR	Cont	g/day overlifetime	GO pathway	GO:0032991	macromolecular complex	CC	4678	84	0.003069	0.795509
Dugue 2019	5606	NR	Cont	g/day overlifetime	GO pathway	GO:0005924	cell-substrate adherens junction	CC	392	13	0.003118	0.795509
Dugue 2019	5606	NR	Cont	g/day overlifetime	GO pathway	GO:1901605	alpha-amino acid metabolic process	BP	217	9	0.003166	0.795509
Dugue 2019	5606	NR	Cont	g/day overlifetime	GO pathway	GO:0031589	cell-substrate adhesion	BP	303	11	0.003242	0.795509
Dugue 2019	5606	NR	Cont	g/day overlifetime	GO pathway	GO:0036464	cytoplasmic ribonucleoprotein granule	CC	178	8	0.003264	0.795509
Dugue 2019	5606	NR	Cont	g/day overlifetime	GO pathway	GO:0005654	nucleoplasm	CC	3244	62	0.003273	0.795509
Dugue 2019	5606	NR	Cont	g/day overlifetime	GO pathway	GO:0072599	establishment of protein localization to endoplasmic reticulum	BP	105	6	0.003282	0.795509
Dugue 2019	5606	NR	Cont	g/day overlifetime	GO pathway	GO:0030055	cell-substrate junction	CC	397	13	0.003471	0.832054
Dugue 2019	5606	NR	Cont	g/day overlifetime	GO pathway	GO:1901566	organonitrogen compound biosynthetic process	BP	1359	31	0.003696	0.868272
Dugue 2019	5606	NR	Cont	g/day overlifetime	GO pathway	GO:1904357	negative regulation of telomere maintenance via telomere lengthening	BP	23	3	0.003702	0.868272
Dugue 2019	5606	NR	Cont	g/day overlifetime	GO pathway	GO:0071704	organic substance metabolic process	BP	10339	163	0.003792	0.87404
Dugue 2019	5606	NR	Cont	g/day overlifetime	GO pathway	GO:0032844	regulation of homeostatic process	BP	449	14	0.003806	0.87404
Dugue 2019	5606	NR	Cont	g/day overlifetime	GO pathway	GO:0032845	negative regulation of homeostatic process	BP	183	8	0.003861	0.877354
Dugue 2019	5606	NR	Cont	g/day overlifetime	GO pathway	GO:0043534	blood vessel endothelial cell migration	BP	76	5	0.00393	0.883849
Dugue 2019	5606	NR	Cont	g/day overlifetime	GO pathway	GO:0071840	cellular component organization or biogenesis	BP	6088	104	0.004028	0.896576
Dugue 2019	5606	NR	Cont	g/day overlifetime	GO pathway	GO:0071702	organic substance transport	BP	2639	52	0.004086	0.900403
Dugue 2019	5606	NR	Cont	g/day overlifetime	GO pathway	GO:1901565	organonitrogen compound catabolic process	BP	359	12	0.004175	0.905172
Dugue 2019	5606	NR	Cont	g/day overlifetime	GO pathway	GO:0034660	ncRNA metabolic process	BP	553	16	0.004219	0.905172
Dugue 2019	5606	NR	Cont	g/day overlifetime	GO pathway	GO:0071705	nitrogen compound transport	BP	2270	46	0.004232	0.905172
Dugue 2019	5606	NR	Cont	g/day overlifetime	GO pathway	GO:0022626	cytosolic ribosome	CC	111	6	0.004315	0.913889
Dugue 2019	5606	NR	Cont	g/day overlifetime	GO pathway	GO:0006520	cellular amino acid metabolic process	BP	362	12	0.004458	0.934384
Dugue 2019	5606	NR	Cont	g/day overlifetime	GO pathway	GO:0006312	mitotic recombination	BP	49	4	0.004537	0.934384
Dugue 2019	5606	NR	Cont	g/day overlifetime	GO pathway	GO:0003676	nucleic acid binding	MF	3880	71	0.004644	0.934384
Dugue 2019	5606	NR	Cont	g/day overlifetime	GO pathway	GO:0035770	ribonucleoprotein granule	CC	189	8	0.004685	0.934384
Dugue 2019	5606	NR	Cont	g/day overlifetime	GO pathway	GO:0043436	oxoacid metabolic process	BP	1040	25	0.004703	0.934384
Dugue 2019	5606	NR	Cont	g/day overlifetime	GO pathway	GO:0033119	negative regulation of RNA splicing	BP	25	3	0.004711	0.934384
Dugue 2019	5606	NR	Cont	g/day overlifetime	GO pathway	GO:0010629	negative regulation of gene expression	BP	1620	35	0.004879	0.934384
Dugue 2019	5606	NR	Cont	g/day overlifetime	GO pathway	GO:0015171	amino acid transmembrane transporter activity	MF	80	5	0.004893	0.934384
Dugue 2019	5606	NR	Cont	g/day overlifetime	GO pathway	GO:0038180	nerve growth factor signaling pathway	BP	8	2	0.004983	0.934384
Dugue 2019	5606	NR	Cont	g/day overlifetime	GO pathway	GO:0043170	macromolecule metabolic process	BP	8767	141	0.005109	0.934384
Dugue 2019	5606	NR	Cont	g/day overlifetime	GO pathway	GO:0030529	intracellular ribonucleoprotein complex	CC	774	20	0.005178	0.934384
Dugue 2019	5606	NR	Cont	g/day overlifetime	GO pathway	GO:1990904	ribonucleoprotein complex	CC	775	20	0.005251	0.934384
Dugue 2019	5606	NR	Cont	g/day overlifetime	GO pathway	GO:0051649	establishment of localization in cell	BP	1989	41	0.005252	0.934384
Dugue 2019	5606	NR	Cont	g/day overlifetime	GO pathway	GO:0017148	negative regulation of translation	BP	153	7	0.005273	0.934384
Dugue 2019	5606	NR	Cont	g/day overlifetime	GO pathway	GO:1901363	heterocyclic compound binding	MF	5727	98	0.005432	0.934384
Dugue 2019	5606	NR	Cont	g/day overlifetime	GO pathway	GO:0006397	mRNA processing	BP	468	14	0.005457	0.934384
Dugue 2019	5606	NR	Cont	g/day overlifetime	GO pathway	GO:0007399	nervous system development	BP	2178	44	0.00548	0.934384
Dugue 2019	5606	NR	Cont	g/day overlifetime	GO pathway	GO:0005730	nucleolus	CC	889	22	0.005661	0.934384
Dugue 2019	5606	NR	Cont	g/day overlifetime	GO pathway	GO:0048522	positive regulation of cellular process	BP	4645	82	0.005687	0.934384
Dugue 2019	5606	NR	Cont	g/day overlifetime	GO pathway	GO:0048731	system development	BP	4377	78	0.005697	0.934384
Dugue 2019	5606	NR	Cont	g/day overlifetime	GO pathway	GO:0032392	DNA geometric change	BP	83	5	0.005718	0.934384
Dugue 2019	5606	NR	Cont	g/day overlifetime	GO pathway	GO:0006082	organic acid metabolic process	BP	1057	25	0.005757	0.934384
Dugue 2019	5606	NR	Cont	g/day overlifetime	GO pathway	GO:0048871	multicellular organismal homeostasis	BP	328	11	0.005845	0.934384
Dugue 2019	5606	NR	Cont	g/day overlifetime	GO pathway	GO:0001726	ruffle	CC	156	7	0.005853	0.934384
Dugue 2019	5606	NR	Cont	g/day overlifetime	GO pathway	GO:0043536	positive regulation of blood vessel endothelial cell migration	BP	27	3	0.005872	0.934384
Dugue 2019	5606	NR	Cont	g/day overlifetime	GO pathway	GO:0031312	extrinsic component of organelle membrane	CC	27	3	0.005872	0.934384
Dugue 2019	5606	NR	Cont	g/day overlifetime	GO pathway	GO:0036002	pre-mRNA binding	MF	27	3	0.005872	0.934384
Dugue 2019	5606	NR	Cont	g/day overlifetime	GO pathway	GO:0097159	organic cyclic compound binding	MF	5811	99	0.005898	0.934384
Dugue 2019	5606	NR	Cont	g/day overlifetime	GO pathway	GO:0042255	ribosome assembly	BP	53	4	0.006009	0.934384
Dugue 2019	5606	NR	Cont	g/day overlifetime	GO pathway	GO:0019843	rRNA binding	MF	53	4	0.006009	0.934384
Dugue 2019	5606	NR	Cont	g/day overlifetime	GO pathway	GO:0005884	actin filament	CC	84	5	0.006013	0.934384
Dugue 2019	5606	NR	Cont	g/day overlifetime	GO pathway	GO:0044444	cytoplasmic part	CC	8946	143	0.006024	0.934384
Dugue 2019	5606	NR	Cont	g/day overlifetime	GO pathway	GO:0006396	RNA processing	BP	896	22	0.00619	0.934384
Dugue 2019	5606	NR	Cont	g/day overlifetime	GO pathway	GO:0000184	nuclear-transcribed mRNA catabolic process, nonsense-mediated decay	BP	120	6	0.00629	0.934384
Dugue 2019	5606	NR	Cont	g/day overlifetime	GO pathway	GO:0010663	positive regulation of striated muscle cell apoptotic process	BP	9	2	0.006349	0.934384
Dugue 2019	5606	NR	Cont	g/day overlifetime	GO pathway	GO:0010666	positive regulation of cardiac muscle cell apoptotic process	BP	9	2	0.006349	0.934384
Dugue 2019	5606	NR	Cont	g/day overlifetime	GO pathway	GO:0032000	positive regulation of fatty acid beta-oxidation	BP	9	2	0.006349	0.934384
Dugue 2019	5606	NR	Cont	g/day overlifetime	GO pathway	GO:0002480	antigen processing and presentation of exogenous peptide antigen via MHC class I, TAP-independent	BP	9	2	0.006349	0.934384
Dugue 2019	5606	NR	Cont	g/day overlifetime	GO pathway	GO:0031053	primary miRNA processing	BP	9	2	0.006349	0.934384
Dugue 2019	5606	NR	Cont	g/day overlifetime	GO pathway	GO:0042612	MHC class I protein complex	CC	9	2	0.006349	0.934384
Dugue 2019	5606	NR	Cont	g/day overlifetime	GO pathway	GO:0003691	double-stranded telomeric DNA binding	MF	9	2	0.006349	0.934384
Dugue 2019	5606	NR	Cont	g/day overlifetime	GO pathway	GO:0010605	negative regulation of macromolecule metabolic process	BP	2446	48	0.006379	0.934384
Dugue 2019	5606	NR	Cont	g/day overlifetime	GO pathway	GO:0043535	regulation of blood vessel endothelial cell migration	BP	54	4	0.006421	0.934384
Dugue 2019	5606	NR	Cont	g/day overlifetime	GO pathway	GO:0050918	positive chemotaxis	BP	54	4	0.006421	0.934384
Dugue 2019	5606	NR	Cont	g/day overlifetime	GO pathway	GO:0033044	regulation of chromosome organization	BP	287	10	0.006509	0.934384
Dugue 2019	5606	NR	Cont	g/day overlifetime	GO pathway	GO:0016072	rRNA metabolic process	BP	287	10	0.006509	0.934384
Dugue 2019	5606	NR	Cont	g/day overlifetime	GO pathway	GO:2000772	regulation of cellular senescence	BP	28	3	0.006511	0.934384
Dugue 2019	5606	NR	Cont	g/day overlifetime	GO pathway	GO:0018146	keratan sulfate biosynthetic process	BP	28	3	0.006511	0.934384
Dugue 2019	5606	NR	Cont	g/day overlifetime	GO pathway	GO:0033120	positive regulation of RNA splicing	BP	28	3	0.006511	0.934384
Dugue 2019	5606	NR	Cont	g/day overlifetime	GO pathway	GO:0007044	cell-substrate junction assembly	BP	86	5	0.006636	0.946084
Dugue 2019	5606	NR	Cont	g/day overlifetime	GO pathway	GO:0051179	localization	BP	5977	101	0.006838	0.964217
Dugue 2019	5606	NR	Cont	g/day overlifetime	GO pathway	GO:1904356	regulation of telomere maintenance via telomere lengthening	BP	55	4	0.006851	0.964217
Dugue 2019	5606	NR	Cont	g/day overlifetime	GO pathway	GO:0006886	intracellular protein transport	BP	1130	26	0.006933	0.969429
Dugue 2019	5606	NR	Cont	g/day overlifetime	GO pathway	GO:0046685	response to arsenic-containing substance	BP	29	3	0.007189	0.990853
Dugue 2019	5606	NR	Cont	g/day overlifetime	GO pathway	GO:0050686	negative regulation of mRNA processing	BP	29	3	0.007189	0.990853
Dugue 2019	5606	NR	Cont	g/day overlifetime	GO pathway	GO:0019222	regulation of metabolic process	BP	6196	104	0.007222	0.990853
Dugue 2019	5606	NR	Cont	g/day overlifetime	GO pathway	GO:0043604	amide biosynthetic process	BP	692	18	0.007341	0.998971
Dugue 2019	5606	NR	Cont	g/day overlifetime	GO pathway	GO:0044260	cellular macromolecule metabolic process	BP	8115	131	0.007373	0.998971
Dugue 2019	5606	NR	Cont	g/day overlifetime	GO pathway	GO:0032060	bleb assembly	BP	10	2	0.007865	1
Dugue 2019	5606	NR	Cont	g/day overlifetime	GO pathway	GO:0034596	phosphatidylinositol phosphate 4-phosphatase activity	MF	10	2	0.007865	1
Dugue 2019	5606	NR	Cont	g/day overlifetime	GO pathway	GO:0034249	negative regulation of cellular amide metabolic process	BP	165	7	0.007879	1
Dugue 2019	5606	NR	Cont	g/day overlifetime	GO pathway	GO:0005912	adherens junction	CC	489	14	0.007906	1
Dugue 2019	5606	NR	Cont	g/day overlifetime	GO pathway	GO:0015711	organic anion transport	BP	440	13	0.008052	1
Dugue 2019	5606	NR	Cont	g/day overlifetime	GO pathway	GO:0016604	nuclear body	CC	700	18	0.008215	1
Dugue 2019	5606	NR	Cont	g/day overlifetime	GO pathway	GO:0070972	protein localization to endoplasmic reticulum	BP	127	6	0.008227	1
Dugue 2019	5606	NR	Cont	g/day overlifetime	GO pathway	GO:0048873	homeostasis of number of cells within a tissue	BP	31	3	0.008668	1
Dugue 2019	5606	NR	Cont	g/day overlifetime	GO pathway	GO:0016043	cellular component organization	BP	5886	99	0.008779	1
Dugue 2019	5606	NR	Cont	g/day overlifetime	GO pathway	GO:0006928	movement of cell or subcellular component	BP	1809	37	0.009046	1
Dugue 2019	5606	NR	Cont	g/day overlifetime	GO pathway	GO:0007275	multicellular organism development	BP	4934	85	0.009254	1
Dugue 2019	5606	NR	Cont	g/day overlifetime	GO pathway	GO:0042273	ribosomal large subunit biogenesis	BP	60	4	0.009289	1
Dugue 2019	5606	NR	Cont	g/day overlifetime	GO pathway	GO:0022625	cytosolic large ribosomal subunit	CC	60	4	0.009289	1
Dugue 2019	5606	NR	Cont	g/day overlifetime	GO pathway	GO:0040011	locomotion	BP	1570	33	0.009295	1
Dugue 2019	5606	NR	Cont	g/day overlifetime	GO pathway	GO:0048699	generation of neurons	BP	1333	29	0.009368	1
Dugue 2019	5606	NR	Cont	g/day overlifetime	GO pathway	GO:2000279	negative regulation of DNA biosynthetic process	BP	32	3	0.009469	1
Dugue 2019	5606	NR	Cont	g/day overlifetime	GO pathway	GO:0032205	negative regulation of telomere maintenance	BP	32	3	0.009469	1
Dugue 2019	5606	NR	Cont	g/day overlifetime	GO pathway	GO:0008305	integrin complex	CC	32	3	0.009469	1
Dugue 2019	5606	NR	Cont	g/day overlifetime	GO pathway	GO:0008152	metabolic process	BP	10824	167	0.009477	1
Dugue 2019	5606	NR	Cont	g/day overlifetime	GO pathway	GO:2000773	negative regulation of cellular senescence	BP	11	2	0.009526	1
Dugue 2019	5606	NR	Cont	g/day overlifetime	GO pathway	GO:0006853	carnitine shuttle	BP	11	2	0.009526	1
Dugue 2019	5606	NR	Cont	g/day overlifetime	GO pathway	GO:0019752	carboxylic acid metabolic process	BP	932	22	0.009593	1
Dugue 2019	5606	NR	Cont	g/day overlifetime	GO pathway	GO:0050839	cell adhesion molecule binding	MF	450	13	0.009608	1
Dugue 2019	5606	NR	Cont	g/day overlifetime	GO pathway	GO:0050767	regulation of neurogenesis	BP	659	17	0.009788	1
Dugue 2019	5606	NR	Cont	g/day overlifetime	GO pathway	GO:0006027	glycosaminoglycan catabolic process	BP	61	4	0.009836	1
Dugue 2019	5606	NR	Cont	g/day overlifetime	GO pathway	GO:0000118	histone deacetylase complex	CC	61	4	0.009836	1
Dugue 2019	5606	NR	Cont	g/day overlifetime	GO pathway	GO:0046943	carboxylic acid transmembrane transporter activity	MF	132	6	0.009851	1
Dugue 2019	5606	NR	Cont	g/day overlifetime	GO pathway	GO:2000278	regulation of DNA biosynthetic process	BP	95	5	0.010001	1
Dugue 2019	5606	NR	Cont	g/day overlifetime	GO pathway	GO:0051641	cellular localization	BP	2511	48	0.010286	1
Dugue 2019	5606	NR	Cont	g/day overlifetime	GO pathway	GO:0032456	endocytic recycling	BP	33	3	0.010312	1
Dugue 2019	5606	NR	Cont	g/day overlifetime	GO pathway	GO:0042339	keratan sulfate metabolic process	BP	33	3	0.010312	1
Dugue 2019	5606	NR	Cont	g/day overlifetime	GO pathway	GO:0030218	erythrocyte differentiation	BP	96	5	0.010435	1
Dugue 2019	5606	NR	Cont	g/day overlifetime	GO pathway	GO:0070161	anchoring junction	CC	507	14	0.01064	1
Dugue 2019	5606	NR	Cont	g/day overlifetime	GO pathway	GO:2000573	positive regulation of DNA biosynthetic process	BP	63	4	0.010992	1
Dugue 2019	5606	NR	Cont	g/day overlifetime	GO pathway	GO:0019083	viral transcription	BP	176	7	0.011008	1
Dugue 2019	5606	NR	Cont	g/day overlifetime	GO pathway	GO:0030198	extracellular matrix organization	BP	311	10	0.011093	1
Dugue 2019	5606	NR	Cont	g/day overlifetime	GO pathway	GO:0006261	DNA-dependent DNA replication	BP	136	6	0.011306	1
Dugue 2019	5606	NR	Cont	g/day overlifetime	GO pathway	GO:0043062	extracellular structure organization	BP	312	10	0.011326	1
Dugue 2019	5606	NR	Cont	g/day overlifetime	GO pathway	GO:0046929	negative regulation of neurotransmitter secretion	BP	12	2	0.011329	1
Dugue 2019	5606	NR	Cont	g/day overlifetime	GO pathway	GO:0051764	actin crosslink formation	BP	12	2	0.011329	1
Dugue 2019	5606	NR	Cont	g/day overlifetime	GO pathway	GO:0003697	single-stranded DNA binding	MF	98	5	0.011343	1
Dugue 2019	5606	NR	Cont	g/day overlifetime	GO pathway	GO:0098656	anion transmembrane transport	BP	266	9	0.011507	1
Dugue 2019	5606	NR	Cont	g/day overlifetime	GO pathway	GO:0018108	peptidyl-tyrosine phosphorylation	BP	361	11	0.01153	1
Dugue 2019	5606	NR	Cont	g/day overlifetime	GO pathway	GO:0006026	aminoglycan catabolic process	BP	64	4	0.011601	1
Dugue 2019	5606	NR	Cont	g/day overlifetime	GO pathway	GO:0098588	bounding membrane of organelle	CC	1903	38	0.011806	1
Dugue 2019	5606	NR	Cont	g/day overlifetime	GO pathway	GO:0043043	peptide biosynthetic process	BP	619	16	0.011825	1
Dugue 2019	5606	NR	Cont	g/day overlifetime	GO pathway	GO:0018212	peptidyl-tyrosine modification	BP	363	11	0.011976	1
Dugue 2019	5606	NR	Cont	g/day overlifetime	GO pathway	GO:0003674	molecular_function	MF	16365	235	0.011981	1
Dugue 2019	5606	NR	Cont	g/day overlifetime	GO pathway	GO:0090342	regulation of cell aging	BP	35	3	0.012125	1
Dugue 2019	5606	NR	Cont	g/day overlifetime	GO pathway	GO:0098636	protein complex involved in cell adhesion	CC	35	3	0.012125	1
Dugue 2019	5606	NR	Cont	g/day overlifetime	GO pathway	GO:0016441	posttranscriptional gene silencing	BP	65	4	0.012232	1
Dugue 2019	5606	NR	Cont	g/day overlifetime	GO pathway	GO:0060255	regulation of macromolecule metabolic process	BP	5747	96	0.012458	1
Dugue 2019	5606	NR	Cont	g/day overlifetime	GO pathway	GO:0006661	phosphatidylinositol biosynthetic process	BP	139	6	0.012492	1
Dugue 2019	5606	NR	Cont	g/day overlifetime	GO pathway	GO:0050684	regulation of mRNA processing	BP	101	5	0.012802	1
Dugue 2019	5606	NR	Cont	g/day overlifetime	GO pathway	GO:0000722	telomere maintenance via recombination	BP	36	3	0.013095	1
Dugue 2019	5606	NR	Cont	g/day overlifetime	GO pathway	GO:1903672	positive regulation of sprouting angiogenesis	BP	13	2	0.013268	1
Dugue 2019	5606	NR	Cont	g/day overlifetime	GO pathway	GO:0022008	neurogenesis	BP	1430	30	0.01331	1
Dugue 2019	5606	NR	Cont	g/day overlifetime	GO pathway	GO:0043603	cellular amide metabolic process	BP	905	21	0.013457	1
Dugue 2019	5606	NR	Cont	g/day overlifetime	GO pathway	GO:0048666	neuron development	BP	963	22	0.013619	1
Dugue 2019	5606	NR	Cont	g/day overlifetime	GO pathway	GO:0051172	negative regulation of nitrogen compound metabolic process	BP	1493	31	0.013649	1
Dugue 2019	5606	NR	Cont	g/day overlifetime	GO pathway	GO:0048872	homeostasis of number of cells	BP	228	8	0.013737	1
Dugue 2019	5606	NR	Cont	g/day overlifetime	GO pathway	GO:0002477	antigen processing and presentation of exogenous peptide antigen via MHC class Ib	BP	1	1	0.013737	1
Dugue 2019	5606	NR	Cont	g/day overlifetime	GO pathway	GO:0002481	antigen processing and presentation of exogenous protein antigen via MHC class Ib, TAP-dependent	BP	1	1	0.013737	1
Dugue 2019	5606	NR	Cont	g/day overlifetime	GO pathway	GO:0016036	cellular response to phosphate starvation	BP	1	1	0.013737	1
Dugue 2019	5606	NR	Cont	g/day overlifetime	GO pathway	GO:0031337	positive regulation of sulfur amino acid metabolic process	BP	1	1	0.013737	1
Dugue 2019	5606	NR	Cont	g/day overlifetime	GO pathway	GO:0050668	positive regulation of homocysteine metabolic process	BP	1	1	0.013737	1
Dugue 2019	5606	NR	Cont	g/day overlifetime	GO pathway	GO:0010814	substance P catabolic process	BP	1	1	0.013737	1
Dugue 2019	5606	NR	Cont	g/day overlifetime	GO pathway	GO:0010816	calcitonin catabolic process	BP	1	1	0.013737	1
Dugue 2019	5606	NR	Cont	g/day overlifetime	GO pathway	GO:0034959	endothelin maturation	BP	1	1	0.013737	1
Dugue 2019	5606	NR	Cont	g/day overlifetime	GO pathway	GO:0014843	growth factor dependent regulation of skeletal muscle satellite cell proliferation	BP	1	1	0.013737	1
Dugue 2019	5606	NR	Cont	g/day overlifetime	GO pathway	GO:0006683	galactosylceramide catabolic process	BP	1	1	0.013737	1
Dugue 2019	5606	NR	Cont	g/day overlifetime	GO pathway	GO:1990428	miRNA transport	BP	1	1	0.013737	1
Dugue 2019	5606	NR	Cont	g/day overlifetime	GO pathway	GO:0061534	gamma-aminobutyric acid secretion, neurotransmission	BP	1	1	0.013737	1
Dugue 2019	5606	NR	Cont	g/day overlifetime	GO pathway	GO:0006860	extracellular amino acid transport	BP	1	1	0.013737	1
Dugue 2019	5606	NR	Cont	g/day overlifetime	GO pathway	GO:0071393	cellular response to progesterone stimulus	BP	1	1	0.013737	1
Dugue 2019	5606	NR	Cont	g/day overlifetime	GO pathway	GO:0032207	regulation of telomere maintenance via recombination	BP	1	1	0.013737	1
Dugue 2019	5606	NR	Cont	g/day overlifetime	GO pathway	GO:0032208	negative regulation of telomere maintenance via recombination	BP	1	1	0.013737	1
Dugue 2019	5606	NR	Cont	g/day overlifetime	GO pathway	GO:1903516	regulation of single strand break repair	BP	1	1	0.013737	1
Dugue 2019	5606	NR	Cont	g/day overlifetime	GO pathway	GO:1903517	negative regulation of single strand break repair	BP	1	1	0.013737	1
Dugue 2019	5606	NR	Cont	g/day overlifetime	GO pathway	GO:1903770	negative regulation of beta-galactosidase activity	BP	1	1	0.013737	1
Dugue 2019	5606	NR	Cont	g/day overlifetime	GO pathway	GO:1903823	telomere single strand break repair	BP	1	1	0.013737	1
Dugue 2019	5606	NR	Cont	g/day overlifetime	GO pathway	GO:1903824	negative regulation of telomere single strand break repair	BP	1	1	0.013737	1
Dugue 2019	5606	NR	Cont	g/day overlifetime	GO pathway	GO:0035037	sperm entry	BP	1	1	0.013737	1
Dugue 2019	5606	NR	Cont	g/day overlifetime	GO pathway	GO:0032901	positive regulation of neurotrophin production	BP	1	1	0.013737	1
Dugue 2019	5606	NR	Cont	g/day overlifetime	GO pathway	GO:0035853	chromosome passenger complex localization to spindle midzone	BP	1	1	0.013737	1
Dugue 2019	5606	NR	Cont	g/day overlifetime	GO pathway	GO:0010849	regulation of proton-transporting ATPase activity, rotational mechanism	BP	1	1	0.013737	1
Dugue 2019	5606	NR	Cont	g/day overlifetime	GO pathway	GO:0071228	cellular response to tumor cell	BP	1	1	0.013737	1
Dugue 2019	5606	NR	Cont	g/day overlifetime	GO pathway	GO:0031161	phosphatidylinositol catabolic process	BP	1	1	0.013737	1
Dugue 2019	5606	NR	Cont	g/day overlifetime	GO pathway	GO:0061168	regulation of hair follicle placode formation	BP	1	1	0.013737	1
Dugue 2019	5606	NR	Cont	g/day overlifetime	GO pathway	GO:0061170	negative regulation of hair follicle placode formation	BP	1	1	0.013737	1
Dugue 2019	5606	NR	Cont	g/day overlifetime	GO pathway	GO:0035499	carnosine biosynthetic process	BP	1	1	0.013737	1
Dugue 2019	5606	NR	Cont	g/day overlifetime	GO pathway	GO:0034998	oligosaccharyltransferase I complex	CC	1	1	0.013737	1
Dugue 2019	5606	NR	Cont	g/day overlifetime	GO pathway	GO:0031302	intrinsic component of endosome membrane	CC	1	1	0.013737	1
Dugue 2019	5606	NR	Cont	g/day overlifetime	GO pathway	GO:0045160	myosin I complex	CC	1	1	0.013737	1
Dugue 2019	5606	NR	Cont	g/day overlifetime	GO pathway	GO:0070685	macropinocytic cup	CC	1	1	0.013737	1
Dugue 2019	5606	NR	Cont	g/day overlifetime	GO pathway	GO:0004336	galactosylceramidase activity	MF	1	1	0.013737	1
Dugue 2019	5606	NR	Cont	g/day overlifetime	GO pathway	GO:0003974	UDP-N-acetylglucosamine 4-epimerase activity	MF	1	1	0.013737	1
Dugue 2019	5606	NR	Cont	g/day overlifetime	GO pathway	GO:0003978	UDP-glucose 4-epimerase activity	MF	1	1	0.013737	1
Dugue 2019	5606	NR	Cont	g/day overlifetime	GO pathway	GO:0035605	peptidyl-cysteine S-nitrosylase activity	MF	1	1	0.013737	1
Dugue 2019	5606	NR	Cont	g/day overlifetime	GO pathway	GO:0001069	regulatory region RNA binding	MF	1	1	0.013737	1
Dugue 2019	5606	NR	Cont	g/day overlifetime	GO pathway	GO:0098619	selenocysteine-tRNA ligase activity	MF	1	1	0.013737	1
Dugue 2019	5606	NR	Cont	g/day overlifetime	GO pathway	GO:0015327	cystine:glutamate antiporter activity	MF	1	1	0.013737	1
Dugue 2019	5606	NR	Cont	g/day overlifetime	GO pathway	GO:0015328	cystine secondary active transmembrane transporter activity	MF	1	1	0.013737	1
Dugue 2019	5606	NR	Cont	g/day overlifetime	GO pathway	GO:1901680	sulfur-containing amino acid secondary active transmembrane transporter activity	MF	1	1	0.013737	1
Dugue 2019	5606	NR	Cont	g/day overlifetime	GO pathway	GO:0004617	phosphoglycerate dehydrogenase activity	MF	1	1	0.013737	1
Dugue 2019	5606	NR	Cont	g/day overlifetime	GO pathway	GO:0047730	carnosine synthase activity	MF	1	1	0.013737	1
Dugue 2019	5606	NR	Cont	g/day overlifetime	GO pathway	GO:0045027	DNA end binding	MF	1	1	0.013737	1
Dugue 2019	5606	NR	Cont	g/day overlifetime	GO pathway	GO:0047800	cysteamine dioxygenase activity	MF	1	1	0.013737	1
Dugue 2019	5606	NR	Cont	g/day overlifetime	GO pathway	GO:0004042	acetyl-CoA:L-glutamate N-acetyltransferase activity	MF	1	1	0.013737	1
Dugue 2019	5606	NR	Cont	g/day overlifetime	GO pathway	GO:0030372	high molecular weight B cell growth factor receptor binding	MF	1	1	0.013737	1
Dugue 2019	5606	NR	Cont	g/day overlifetime	GO pathway	GO:0005342	organic acid transmembrane transporter activity	MF	142	6	0.013763	1
Dugue 2019	5606	NR	Cont	g/day overlifetime	GO pathway	GO:0005178	integrin binding	MF	103	5	0.013843	1
Dugue 2019	5606	NR	Cont	g/day overlifetime	GO pathway	GO:0003712	transcription cofactor activity	MF	525	14	0.014065	1
Dugue 2019	5606	NR	Cont	g/day overlifetime	GO pathway	GO:0016409	palmitoyltransferase activity	MF	37	3	0.014109	1
Dugue 2019	5606	NR	Cont	g/day overlifetime	GO pathway	GO:0005623	cell	CC	15767	228	0.014165	1
Dugue 2019	5606	NR	Cont	g/day overlifetime	GO pathway	GO:0006612	protein targeting to membrane	BP	185	7	0.014171	1
Dugue 2019	5606	NR	Cont	g/day overlifetime	GO pathway	GO:0034101	erythrocyte homeostasis	BP	104	5	0.014384	1
Dugue 2019	5606	NR	Cont	g/day overlifetime	GO pathway	GO:0016054	organic acid catabolic process	BP	230	8	0.014411	1
Dugue 2019	5606	NR	Cont	g/day overlifetime	GO pathway	GO:0046395	carboxylic acid catabolic process	BP	230	8	0.014411	1
Dugue 2019	5606	NR	Cont	g/day overlifetime	GO pathway	GO:0046474	glycerophospholipid biosynthetic process	BP	230	8	0.014411	1
Dugue 2019	5606	NR	Cont	g/day overlifetime	GO pathway	GO:0043405	regulation of MAP kinase activity	BP	324	10	0.014428	1
Dugue 2019	5606	NR	Cont	g/day overlifetime	GO pathway	GO:0044707	single-multicellular organism process	BP	5989	99	0.014669	1
Dugue 2019	5606	NR	Cont	g/day overlifetime	GO pathway	GO:0044445	cytosolic part	CC	231	8	0.014758	1
Dugue 2019	5606	NR	Cont	g/day overlifetime	GO pathway	GO:0006810	transport	BP	4818	82	0.014768	1
Dugue 2019	5606	NR	Cont	g/day overlifetime	GO pathway	GO:0019080	viral gene expression	BP	187	7	0.014954	1
Dugue 2019	5606	NR	Cont	g/day overlifetime	GO pathway	GO:0048518	positive regulation of biological process	BP	5164	87	0.015059	1
Dugue 2019	5606	NR	Cont	g/day overlifetime	GO pathway	GO:0014066	regulation of phosphatidylinositol 3-kinase signaling	BP	145	6	0.015121	1
Dugue 2019	5606	NR	Cont	g/day overlifetime	GO pathway	GO:0045646	regulation of erythrocyte differentiation	BP	38	3	0.015166	1
Dugue 2019	5606	NR	Cont	g/day overlifetime	GO pathway	GO:1903312	negative regulation of mRNA metabolic process	BP	38	3	0.015166	1
Dugue 2019	5606	NR	Cont	g/day overlifetime	GO pathway	GO:0098927	vesicle-mediated transport between endosomal compartments	BP	38	3	0.015166	1
Dugue 2019	5606	NR	Cont	g/day overlifetime	GO pathway	GO:2001212	regulation of vasculogenesis	BP	14	2	0.015341	1
Dugue 2019	5606	NR	Cont	g/day overlifetime	GO pathway	GO:0046321	positive regulation of fatty acid oxidation	BP	14	2	0.015341	1
Dugue 2019	5606	NR	Cont	g/day overlifetime	GO pathway	GO:0001921	positive regulation of receptor recycling	BP	14	2	0.015341	1
Dugue 2019	5606	NR	Cont	g/day overlifetime	GO pathway	GO:0008499	UDP-galactose:beta-N-acetylglucosamine beta-1,3-galactosyltransferase activity	MF	14	2	0.015341	1
Dugue 2019	5606	NR	Cont	g/day overlifetime	GO pathway	GO:0042326	negative regulation of phosphorylation	BP	428	12	0.015607	1
Dugue 2019	5606	NR	Cont	g/day overlifetime	GO pathway	GO:0007045	cell-substrate adherens junction assembly	BP	70	4	0.015713	1
Dugue 2019	5606	NR	Cont	g/day overlifetime	GO pathway	GO:0048041	focal adhesion assembly	BP	70	4	0.015713	1
Dugue 2019	5606	NR	Cont	g/day overlifetime	GO pathway	GO:0044242	cellular lipid catabolic process	BP	189	7	0.015767	1
Dugue 2019	5606	NR	Cont	g/day overlifetime	GO pathway	GO:0000723	telomere maintenance	BP	147	6	0.016077	1
Dugue 2019	5606	NR	Cont	g/day overlifetime	GO pathway	GO:0005737	cytoplasm	CC	10803	165	0.017153	1
Dugue 2019	5606	NR	Cont	g/day overlifetime	GO pathway	GO:0050769	positive regulation of neurogenesis	BP	384	11	0.017499	1
Dugue 2019	5606	NR	Cont	g/day overlifetime	GO pathway	GO:0051589	negative regulation of neurotransmitter transport	BP	15	2	0.017542	1
Dugue 2019	5606	NR	Cont	g/day overlifetime	GO pathway	GO:0071243	cellular response to arsenic-containing substance	BP	15	2	0.017542	1
Dugue 2019	5606	NR	Cont	g/day overlifetime	GO pathway	GO:2000251	positive regulation of actin cytoskeleton reorganization	BP	15	2	0.017542	1
Dugue 2019	5606	NR	Cont	g/day overlifetime	GO pathway	GO:0046965	retinoid X receptor binding	MF	15	2	0.017542	1
Dugue 2019	5606	NR	Cont	g/day overlifetime	GO pathway	GO:1901575	organic substance catabolic process	BP	1832	36	0.017795	1
Dugue 2019	5606	NR	Cont	g/day overlifetime	GO pathway	GO:0034329	cell junction assembly	BP	194	7	0.017936	1
Dugue 2019	5606	NR	Cont	g/day overlifetime	GO pathway	GO:0010833	telomere maintenance via telomere lengthening	BP	73	4	0.018072	1
Dugue 2019	5606	NR	Cont	g/day overlifetime	GO pathway	GO:0032204	regulation of telomere maintenance	BP	73	4	0.018072	1
Dugue 2019	5606	NR	Cont	g/day overlifetime	GO pathway	GO:0032508	DNA duplex unwinding	BP	73	4	0.018072	1
Dugue 2019	5606	NR	Cont	g/day overlifetime	GO pathway	GO:0006412	translation	BP	596	15	0.018082	1
Dugue 2019	5606	NR	Cont	g/day overlifetime	GO pathway	GO:0031175	neuron projection development	BP	819	19	0.018335	1
Dugue 2019	5606	NR	Cont	g/day overlifetime	GO pathway	GO:0051168	nuclear export	BP	195	7	0.018394	1
Dugue 2019	5606	NR	Cont	g/day overlifetime	GO pathway	GO:0044767	single-organism developmental process	BP	5690	94	0.018511	1
Dugue 2019	5606	NR	Cont	g/day overlifetime	GO pathway	GO:0010494	cytoplasmic stress granule	CC	41	3	0.018599	1
Dugue 2019	5606	NR	Cont	g/day overlifetime	GO pathway	GO:0065008	regulation of biological quality	BP	3449	61	0.018608	1
Dugue 2019	5606	NR	Cont	g/day overlifetime	GO pathway	GO:0071897	DNA biosynthetic process	BP	196	7	0.01886	1
Dugue 2019	5606	NR	Cont	g/day overlifetime	GO pathway	GO:1901888	regulation of cell junction assembly	BP	74	4	0.018904	1
Dugue 2019	5606	NR	Cont	g/day overlifetime	GO pathway	GO:0034470	ncRNA processing	BP	389	11	0.019057	1
Dugue 2019	5606	NR	Cont	g/day overlifetime	GO pathway	GO:0034613	cellular protein localization	BP	1717	34	0.019068	1
Dugue 2019	5606	NR	Cont	g/day overlifetime	GO pathway	GO:0060284	regulation of cell development	BP	766	18	0.019074	1
Dugue 2019	5606	NR	Cont	g/day overlifetime	GO pathway	GO:0015833	peptide transport	BP	1967	38	0.019176	1
Dugue 2019	5606	NR	Cont	g/day overlifetime	GO pathway	GO:0006024	glycosaminoglycan biosynthetic process	BP	112	5	0.01923	1
Dugue 2019	5606	NR	Cont	g/day overlifetime	GO pathway	GO:1901564	organonitrogen compound metabolic process	BP	2220	42	0.019236	1
Dugue 2019	5606	NR	Cont	g/day overlifetime	GO pathway	GO:0051234	establishment of localization	BP	4945	83	0.019812	1
Dugue 2019	5606	NR	Cont	g/day overlifetime	GO pathway	GO:0005088	Ras guanyl-nucleotide exchange factor activity	MF	244	8	0.019823	1
Dugue 2019	5606	NR	Cont	g/day overlifetime	GO pathway	GO:1990090	cellular response to nerve growth factor stimulus	BP	42	3	0.019831	1
Dugue 2019	5606	NR	Cont	g/day overlifetime	GO pathway	GO:0097300	programmed necrotic cell death	BP	42	3	0.019831	1
Dugue 2019	5606	NR	Cont	g/day overlifetime	GO pathway	GO:0031998	regulation of fatty acid beta-oxidation	BP	16	2	0.019869	1
Dugue 2019	5606	NR	Cont	g/day overlifetime	GO pathway	GO:0048026	positive regulation of mRNA splicing, via spliceosome	BP	16	2	0.019869	1
Dugue 2019	5606	NR	Cont	g/day overlifetime	GO pathway	GO:0048531	beta-1,3-galactosyltransferase activity	MF	16	2	0.019869	1
Dugue 2019	5606	NR	Cont	g/day overlifetime	GO pathway	GO:0006023	aminoglycan biosynthetic process	BP	113	5	0.019902	1
Dugue 2019	5606	NR	Cont	g/day overlifetime	GO pathway	GO:1903510	mucopolysaccharide metabolic process	BP	113	5	0.019902	1
Dugue 2019	5606	NR	Cont	g/day overlifetime	GO pathway	GO:0005634	nucleus	CC	6829	110	0.01999	1
Dugue 2019	5606	NR	Cont	g/day overlifetime	GO pathway	GO:0032502	developmental process	BP	5777	95	0.020084	1
Dugue 2019	5606	NR	Cont	g/day overlifetime	GO pathway	GO:0010638	positive regulation of organelle organization	BP	604	15	0.020113	1
Dugue 2019	5606	NR	Cont	g/day overlifetime	GO pathway	GO:0043542	endothelial cell migration	BP	155	6	0.020318	1
Dugue 2019	5606	NR	Cont	g/day overlifetime	GO pathway	GO:0044431	Golgi apparatus part	CC	886	20	0.020457	1
Dugue 2019	5606	NR	Cont	g/day overlifetime	GO pathway	GO:0043005	neuron projection	CC	944	21	0.02052	1
Dugue 2019	5606	NR	Cont	g/day overlifetime	GO pathway	GO:0070727	cellular macromolecule localization	BP	1727	34	0.020592	1
Dugue 2019	5606	NR	Cont	g/day overlifetime	GO pathway	GO:0044464	cell part	CC	15742	227	0.020669	1
Dugue 2019	5606	NR	Cont	g/day overlifetime	GO pathway	GO:0045936	negative regulation of phosphate metabolic process	BP	552	14	0.020731	1
Dugue 2019	5606	NR	Cont	g/day overlifetime	GO pathway	GO:0003735	structural constituent of ribosome	MF	156	6	0.020896	1
Dugue 2019	5606	NR	Cont	g/day overlifetime	GO pathway	GO:0010563	negative regulation of phosphorus metabolic process	BP	553	14	0.021017	1
Dugue 2019	5606	NR	Cont	g/day overlifetime	GO pathway	GO:2001251	negative regulation of chromosome organization	BP	115	5	0.021292	1
Dugue 2019	5606	NR	Cont	g/day overlifetime	GO pathway	GO:0030054	cell junction	CC	1184	25	0.02149	1
Dugue 2019	5606	NR	Cont	g/day overlifetime	GO pathway	GO:0003713	transcription coactivator activity	MF	296	9	0.021543	1
Dugue 2019	5606	NR	Cont	g/day overlifetime	GO pathway	GO:0048856	anatomical structure development	BP	5376	89	0.021569	1
Dugue 2019	5606	NR	Cont	g/day overlifetime	GO pathway	GO:0000956	nuclear-transcribed mRNA catabolic process	BP	202	7	0.021832	1
Dugue 2019	5606	NR	Cont	g/day overlifetime	GO pathway	GO:0006807	nitrogen compound metabolic process	BP	6709	108	0.021975	1
Dugue 2019	5606	NR	Cont	g/day overlifetime	GO pathway	GO:0042886	amide transport	BP	1988	38	0.022279	1
Dugue 2019	5606	NR	Cont	g/day overlifetime	GO pathway	GO:0090344	negative regulation of cell aging	BP	17	2	0.022316	1
Dugue 2019	5606	NR	Cont	g/day overlifetime	GO pathway	GO:0010661	positive regulation of muscle cell apoptotic process	BP	17	2	0.022316	1
Dugue 2019	5606	NR	Cont	g/day overlifetime	GO pathway	GO:0006103	2-oxoglutarate metabolic process	BP	17	2	0.022316	1
Dugue 2019	5606	NR	Cont	g/day overlifetime	GO pathway	GO:0045738	negative regulation of DNA repair	BP	17	2	0.022316	1
Dugue 2019	5606	NR	Cont	g/day overlifetime	GO pathway	GO:0004812	aminoacyl-tRNA ligase activity	MF	44	3	0.022427	1
Dugue 2019	5606	NR	Cont	g/day overlifetime	GO pathway	GO:0016875	ligase activity, forming carbon-oxygen bonds	MF	44	3	0.022427	1
Dugue 2019	5606	NR	Cont	g/day overlifetime	GO pathway	GO:0016876	ligase activity, forming aminoacyl-tRNA and related compounds	MF	44	3	0.022427	1
Dugue 2019	5606	NR	Cont	g/day overlifetime	GO pathway	GO:0008652	cellular amino acid biosynthetic process	BP	78	4	0.02247	1
Dugue 2019	5606	NR	Cont	g/day overlifetime	GO pathway	GO:0009056	catabolic process	BP	2245	42	0.022761	1
Dugue 2019	5606	NR	Cont	g/day overlifetime	GO pathway	GO:0065007	biological regulation	BP	11170	169	0.022795	1
Dugue 2019	5606	NR	Cont	g/day overlifetime	GO pathway	GO:0006401	RNA catabolic process	BP	251	8	0.023013	1
Dugue 2019	5606	NR	Cont	g/day overlifetime	GO pathway	GO:0048589	developmental growth	BP	560	14	0.023103	1
Dugue 2019	5606	NR	Cont	g/day overlifetime	GO pathway	GO:0051348	negative regulation of transferase activity	BP	350	10	0.023273	1
Dugue 2019	5606	NR	Cont	g/day overlifetime	GO pathway	GO:0043234	protein complex	CC	2961	53	0.023301	1
Dugue 2019	5606	NR	Cont	g/day overlifetime	GO pathway	GO:0032200	telomere organization	BP	160	6	0.023322	1
Dugue 2019	5606	NR	Cont	g/day overlifetime	GO pathway	GO:0001909	leukocyte mediated cytotoxicity	BP	79	4	0.023421	1
Dugue 2019	5606	NR	Cont	g/day overlifetime	GO pathway	GO:0010594	regulation of endothelial cell migration	BP	118	5	0.023494	1
Dugue 2019	5606	NR	Cont	g/day overlifetime	GO pathway	GO:0015031	protein transport	BP	1933	37	0.023576	1
Dugue 2019	5606	NR	Cont	g/day overlifetime	GO pathway	GO:1990089	response to nerve growth factor	BP	45	3	0.023791	1
Dugue 2019	5606	NR	Cont	g/day overlifetime	GO pathway	GO:0001954	positive regulation of cell-matrix adhesion	BP	45	3	0.023791	1
Dugue 2019	5606	NR	Cont	g/day overlifetime	GO pathway	GO:0030203	glycosaminoglycan metabolic process	BP	161	6	0.023957	1
Dugue 2019	5606	NR	Cont	g/day overlifetime	GO pathway	GO:0021543	pallium development	BP	161	6	0.023957	1
Dugue 2019	5606	NR	Cont	g/day overlifetime	GO pathway	GO:0034333	adherens junction assembly	BP	80	4	0.024396	1
Dugue 2019	5606	NR	Cont	g/day overlifetime	GO pathway	GO:0031090	organelle membrane	CC	2773	50	0.024454	1
Dugue 2019	5606	NR	Cont	g/day overlifetime	GO pathway	GO:0033673	negative regulation of kinase activity	BP	254	8	0.024485	1
Dugue 2019	5606	NR	Cont	g/day overlifetime	GO pathway	GO:0006364	rRNA processing	BP	254	8	0.024485	1
Dugue 2019	5606	NR	Cont	g/day overlifetime	GO pathway	GO:0009084	glutamine family amino acid biosynthetic process	BP	18	2	0.024882	1
Dugue 2019	5606	NR	Cont	g/day overlifetime	GO pathway	GO:0050860	negative regulation of T cell receptor signaling pathway	BP	18	2	0.024882	1
Dugue 2019	5606	NR	Cont	g/day overlifetime	GO pathway	GO:1900745	positive regulation of p38MAPK cascade	BP	18	2	0.024882	1
Dugue 2019	5606	NR	Cont	g/day overlifetime	GO pathway	GO:0008171	O-methyltransferase activity	MF	18	2	0.024882	1
Dugue 2019	5606	NR	Cont	g/day overlifetime	GO pathway	GO:0031252	cell leading edge	CC	354	10	0.024921	1
Dugue 2019	5606	NR	Cont	g/day overlifetime	GO pathway	GO:0031901	early endosome membrane	CC	120	5	0.025041	1
Dugue 2019	5606	NR	Cont	g/day overlifetime	GO pathway	GO:0008307	structural constituent of muscle	MF	46	3	0.025199	1
Dugue 2019	5606	NR	Cont	g/day overlifetime	GO pathway	GO:0051276	chromosome organization	BP	1143	24	0.025466	1
Dugue 2019	5606	NR	Cont	g/day overlifetime	GO pathway	GO:0010467	gene expression	BP	5137	85	0.025658	1
Dugue 2019	5606	NR	Cont	g/day overlifetime	GO pathway	GO:0010468	regulation of gene expression	BP	4317	73	0.025864	1
Dugue 2019	5606	NR	Cont	g/day overlifetime	GO pathway	GO:0007169	transmembrane receptor protein tyrosine kinase signaling pathway	BP	680	16	0.025998	1
Dugue 2019	5606	NR	Cont	g/day overlifetime	GO pathway	GO:0045017	glycerolipid biosynthetic process	BP	257	8	0.026022	1
Dugue 2019	5606	NR	Cont	g/day overlifetime	GO pathway	GO:0008380	RNA splicing	BP	409	11	0.02633	1
Dugue 2019	5606	NR	Cont	g/day overlifetime	GO pathway	GO:0030425	dendrite	CC	462	12	0.026419	1
Dugue 2019	5606	NR	Cont	g/day overlifetime	GO pathway	GO:0000781	chromosome, telomeric region	CC	165	6	0.026612	1
Dugue 2019	5606	NR	Cont	g/day overlifetime	GO pathway	GO:0048008	platelet-derived growth factor receptor signaling pathway	BP	47	3	0.026651	1
Dugue 2019	5606	NR	Cont	g/day overlifetime	GO pathway	GO:0002181	cytoplasmic translation	BP	47	3	0.026651	1
Dugue 2019	5606	NR	Cont	g/day overlifetime	GO pathway	GO:0008375	acetylglucosaminyltransferase activity	MF	47	3	0.026651	1
Dugue 2019	5606	NR	Cont	g/day overlifetime	GO pathway	GO:0044248	cellular catabolic process	BP	1888	36	0.026759	1
Dugue 2019	5606	NR	Cont	g/day overlifetime	GO pathway	GO:1901361	organic cyclic compound catabolic process	BP	464	12	0.027192	1
Dugue 2019	5606	NR	Cont	g/day overlifetime	GO pathway	GO:0032899	regulation of neurotrophin production	BP	2	1	0.027287	1
Dugue 2019	5606	NR	Cont	g/day overlifetime	GO pathway	GO:0036309	protein localization to M-band	BP	2	1	0.027287	1
Dugue 2019	5606	NR	Cont	g/day overlifetime	GO pathway	GO:0034758	positive regulation of iron ion transport	BP	2	1	0.027287	1
Dugue 2019	5606	NR	Cont	g/day overlifetime	GO pathway	GO:0071283	cellular response to iron(III) ion	BP	2	1	0.027287	1
Dugue 2019	5606	NR	Cont	g/day overlifetime	GO pathway	GO:1900390	regulation of iron ion import	BP	2	1	0.027287	1
Dugue 2019	5606	NR	Cont	g/day overlifetime	GO pathway	GO:1903989	regulation of ferrous iron import into cell	BP	2	1	0.027287	1
Dugue 2019	5606	NR	Cont	g/day overlifetime	GO pathway	GO:1903991	positive regulation of ferrous iron import into cell	BP	2	1	0.027287	1
Dugue 2019	5606	NR	Cont	g/day overlifetime	GO pathway	GO:1904432	regulation of ferrous iron binding	BP	2	1	0.027287	1
Dugue 2019	5606	NR	Cont	g/day overlifetime	GO pathway	GO:1904434	positive regulation of ferrous iron binding	BP	2	1	0.027287	1
Dugue 2019	5606	NR	Cont	g/day overlifetime	GO pathway	GO:1904435	regulation of transferrin receptor binding	BP	2	1	0.027287	1
Dugue 2019	5606	NR	Cont	g/day overlifetime	GO pathway	GO:1904437	positive regulation of transferrin receptor binding	BP	2	1	0.027287	1
Dugue 2019	5606	NR	Cont	g/day overlifetime	GO pathway	GO:0031335	regulation of sulfur amino acid metabolic process	BP	2	1	0.027287	1
Dugue 2019	5606	NR	Cont	g/day overlifetime	GO pathway	GO:0050666	regulation of homocysteine metabolic process	BP	2	1	0.027287	1
Dugue 2019	5606	NR	Cont	g/day overlifetime	GO pathway	GO:0086098	angiotensin-activated signaling pathway involved in heart process	BP	2	1	0.027287	1
Dugue 2019	5606	NR	Cont	g/day overlifetime	GO pathway	GO:0042412	taurine biosynthetic process	BP	2	1	0.027287	1
Dugue 2019	5606	NR	Cont	g/day overlifetime	GO pathway	GO:0046305	alkanesulfonate biosynthetic process	BP	2	1	0.027287	1
Dugue 2019	5606	NR	Cont	g/day overlifetime	GO pathway	GO:0045914	negative regulation of catecholamine metabolic process	BP	2	1	0.027287	1
Dugue 2019	5606	NR	Cont	g/day overlifetime	GO pathway	GO:0045963	negative regulation of dopamine metabolic process	BP	2	1	0.027287	1
Dugue 2019	5606	NR	Cont	g/day overlifetime	GO pathway	GO:0010813	neuropeptide catabolic process	BP	2	1	0.027287	1
Dugue 2019	5606	NR	Cont	g/day overlifetime	GO pathway	GO:0042660	positive regulation of cell fate specification	BP	2	1	0.027287	1
Dugue 2019	5606	NR	Cont	g/day overlifetime	GO pathway	GO:0019376	galactolipid catabolic process	BP	2	1	0.027287	1
Dugue 2019	5606	NR	Cont	g/day overlifetime	GO pathway	GO:0035606	peptidyl-cysteine S-trans-nitrosylation	BP	2	1	0.027287	1
Dugue 2019	5606	NR	Cont	g/day overlifetime	GO pathway	GO:0006426	glycyl-tRNA aminoacylation	BP	2	1	0.027287	1
Dugue 2019	5606	NR	Cont	g/day overlifetime	GO pathway	GO:1905449	regulation of Fc-gamma receptor signaling pathway involved in phagocytosis	BP	2	1	0.027287	1
Dugue 2019	5606	NR	Cont	g/day overlifetime	GO pathway	GO:1905451	positive regulation of Fc-gamma receptor signaling pathway involved in phagocytosis	BP	2	1	0.027287	1
Dugue 2019	5606	NR	Cont	g/day overlifetime	GO pathway	GO:0090402	oncogene-induced cell senescence	BP	2	1	0.027287	1
Dugue 2019	5606	NR	Cont	g/day overlifetime	GO pathway	GO:1905661	regulation of telomerase RNA reverse transcriptase activity	BP	2	1	0.027287	1
Dugue 2019	5606	NR	Cont	g/day overlifetime	GO pathway	GO:1905663	positive regulation of telomerase RNA reverse transcriptase activity	BP	2	1	0.027287	1
Dugue 2019	5606	NR	Cont	g/day overlifetime	GO pathway	GO:0006858	extracellular transport	BP	2	1	0.027287	1
Dugue 2019	5606	NR	Cont	g/day overlifetime	GO pathway	GO:0021896	forebrain astrocyte differentiation	BP	2	1	0.027287	1
Dugue 2019	5606	NR	Cont	g/day overlifetime	GO pathway	GO:0021897	forebrain astrocyte development	BP	2	1	0.027287	1
Dugue 2019	5606	NR	Cont	g/day overlifetime	GO pathway	GO:0018277	protein deamination	BP	2	1	0.027287	1
Dugue 2019	5606	NR	Cont	g/day overlifetime	GO pathway	GO:0035279	mRNA cleavage involved in gene silencing by miRNA	BP	2	1	0.027287	1
Dugue 2019	5606	NR	Cont	g/day overlifetime	GO pathway	GO:0098795	mRNA cleavage involved in gene silencing	BP	2	1	0.027287	1
Dugue 2019	5606	NR	Cont	g/day overlifetime	GO pathway	GO:0032796	uropod organization	BP	2	1	0.027287	1
Dugue 2019	5606	NR	Cont	g/day overlifetime	GO pathway	GO:0061535	glutamate secretion, neurotransmission	BP	2	1	0.027287	1
Dugue 2019	5606	NR	Cont	g/day overlifetime	GO pathway	GO:1900220	semaphorin-plexin signaling pathway involved in bone trabecula morphogenesis	BP	2	1	0.027287	1
Dugue 2019	5606	NR	Cont	g/day overlifetime	GO pathway	GO:0006434	seryl-tRNA aminoacylation	BP	2	1	0.027287	1
Dugue 2019	5606	NR	Cont	g/day overlifetime	GO pathway	GO:0032213	regulation of telomere maintenance via semi-conservative replication	BP	2	1	0.027287	1
Dugue 2019	5606	NR	Cont	g/day overlifetime	GO pathway	GO:0032214	negative regulation of telomere maintenance via semi-conservative replication	BP	2	1	0.027287	1
Dugue 2019	5606	NR	Cont	g/day overlifetime	GO pathway	GO:1904534	negative regulation of telomeric loop disassembly	BP	2	1	0.027287	1
Dugue 2019	5606	NR	Cont	g/day overlifetime	GO pathway	GO:1905777	regulation of exonuclease activity	BP	2	1	0.027287	1
Dugue 2019	5606	NR	Cont	g/day overlifetime	GO pathway	GO:1905778	negative regulation of exonuclease activity	BP	2	1	0.027287	1
Dugue 2019	5606	NR	Cont	g/day overlifetime	GO pathway	GO:1905838	regulation of telomeric D-loop disassembly	BP	2	1	0.027287	1
Dugue 2019	5606	NR	Cont	g/day overlifetime	GO pathway	GO:1905839	negative regulation of telomeric D-loop disassembly	BP	2	1	0.027287	1
Dugue 2019	5606	NR	Cont	g/day overlifetime	GO pathway	GO:0048239	negative regulation of DNA recombination at telomere	BP	2	1	0.027287	1
Dugue 2019	5606	NR	Cont	g/day overlifetime	GO pathway	GO:0072695	regulation of DNA recombination at telomere	BP	2	1	0.027287	1
Dugue 2019	5606	NR	Cont	g/day overlifetime	GO pathway	GO:2000276	negative regulation of oxidative phosphorylation uncoupler activity	BP	2	1	0.027287	1
Dugue 2019	5606	NR	Cont	g/day overlifetime	GO pathway	GO:0006437	tyrosyl-tRNA aminoacylation	BP	2	1	0.027287	1
Dugue 2019	5606	NR	Cont	g/day overlifetime	GO pathway	GO:1904016	response to Thyroglobulin triiodothyronine	BP	2	1	0.027287	1
Dugue 2019	5606	NR	Cont	g/day overlifetime	GO pathway	GO:1904017	cellular response to Thyroglobulin triiodothyronine	BP	2	1	0.027287	1
Dugue 2019	5606	NR	Cont	g/day overlifetime	GO pathway	GO:0035498	carnosine metabolic process	BP	2	1	0.027287	1
Dugue 2019	5606	NR	Cont	g/day overlifetime	GO pathway	GO:0016256	N-glycan processing to lysosome	BP	2	1	0.027287	1
Dugue 2019	5606	NR	Cont	g/day overlifetime	GO pathway	GO:0031905	early endosome lumen	CC	2	1	0.027287	1
Dugue 2019	5606	NR	Cont	g/day overlifetime	GO pathway	GO:0034687	integrin alphaL-beta2 complex	CC	2	1	0.027287	1
Dugue 2019	5606	NR	Cont	g/day overlifetime	GO pathway	GO:0017102	methionyl glutamyl tRNA synthetase complex	CC	2	1	0.027287	1
Dugue 2019	5606	NR	Cont	g/day overlifetime	GO pathway	GO:0005668	RNA polymerase transcription factor SL1 complex	CC	2	1	0.027287	1
Dugue 2019	5606	NR	Cont	g/day overlifetime	GO pathway	GO:0004081	bis(5'-nucleosyl)-tetraphosphatase (asymmetrical) activity	MF	2	1	0.027287	1
Dugue 2019	5606	NR	Cont	g/day overlifetime	GO pathway	GO:0008796	bis(5'-nucleosyl)-tetraphosphatase activity	MF	2	1	0.027287	1
Dugue 2019	5606	NR	Cont	g/day overlifetime	GO pathway	GO:0098770	FBXO family protein binding	MF	2	1	0.027287	1
Dugue 2019	5606	NR	Cont	g/day overlifetime	GO pathway	GO:0038062	protein tyrosine kinase collagen receptor activity	MF	2	1	0.027287	1
Dugue 2019	5606	NR	Cont	g/day overlifetime	GO pathway	GO:0016206	catechol O-methyltransferase activity	MF	2	1	0.027287	1
Dugue 2019	5606	NR	Cont	g/day overlifetime	GO pathway	GO:0102084	L-dopa O-methyltransferase activity	MF	2	1	0.027287	1
Dugue 2019	5606	NR	Cont	g/day overlifetime	GO pathway	GO:1990698	palmitoleoyltransferase activity	MF	2	1	0.027287	1
Dugue 2019	5606	NR	Cont	g/day overlifetime	GO pathway	GO:0032422	purine-rich negative regulatory element binding	MF	2	1	0.027287	1
Dugue 2019	5606	NR	Cont	g/day overlifetime	GO pathway	GO:0004365	glyceraldehyde-3-phosphate dehydrogenase (NAD+) (phosphorylating) activity	MF	2	1	0.027287	1
Dugue 2019	5606	NR	Cont	g/day overlifetime	GO pathway	GO:0043891	glyceraldehyde-3-phosphate dehydrogenase (NAD(P)+) (phosphorylating) activity	MF	2	1	0.027287	1
Dugue 2019	5606	NR	Cont	g/day overlifetime	GO pathway	GO:0004820	glycine-tRNA ligase activity	MF	2	1	0.027287	1
Dugue 2019	5606	NR	Cont	g/day overlifetime	GO pathway	GO:0004021	L-alanine:2-oxoglutarate aminotransferase activity	MF	2	1	0.027287	1
Dugue 2019	5606	NR	Cont	g/day overlifetime	GO pathway	GO:0047635	alanine-oxo-acid transaminase activity	MF	2	1	0.027287	1
Dugue 2019	5606	NR	Cont	g/day overlifetime	GO pathway	GO:0001641	group II metabotropic glutamate receptor activity	MF	2	1	0.027287	1
Dugue 2019	5606	NR	Cont	g/day overlifetime	GO pathway	GO:0061752	telomeric repeat-containing RNA binding	MF	2	1	0.027287	1
Dugue 2019	5606	NR	Cont	g/day overlifetime	GO pathway	GO:0005153	interleukin-8 receptor binding	MF	2	1	0.027287	1
Dugue 2019	5606	NR	Cont	g/day overlifetime	GO pathway	GO:0016316	phosphatidylinositol-3,4-bisphosphate 4-phosphatase activity	MF	2	1	0.027287	1
Dugue 2019	5606	NR	Cont	g/day overlifetime	GO pathway	GO:0017161	inositol-1,3,4-trisphosphate 4-phosphatase activity	MF	2	1	0.027287	1
Dugue 2019	5606	NR	Cont	g/day overlifetime	GO pathway	GO:0052828	inositol-3,4-bisphosphate 4-phosphatase activity	MF	2	1	0.027287	1
Dugue 2019	5606	NR	Cont	g/day overlifetime	GO pathway	GO:0070404	NADH binding	MF	2	1	0.027287	1
Dugue 2019	5606	NR	Cont	g/day overlifetime	GO pathway	GO:0004828	serine-tRNA ligase activity	MF	2	1	0.027287	1
Dugue 2019	5606	NR	Cont	g/day overlifetime	GO pathway	GO:0047025	3-oxoacyl-[acyl-carrier-protein] reductase (NADH) activity	MF	2	1	0.027287	1
Dugue 2019	5606	NR	Cont	g/day overlifetime	GO pathway	GO:0004831	tyrosine-tRNA ligase activity	MF	2	1	0.027287	1
Dugue 2019	5606	NR	Cont	g/day overlifetime	GO pathway	GO:0004782	sulfinoalanine decarboxylase activity	MF	2	1	0.027287	1
Dugue 2019	5606	NR	Cont	g/day overlifetime	GO pathway	GO:0006022	aminoglycan metabolic process	BP	166	6	0.027305	1
Dugue 2019	5606	NR	Cont	g/day overlifetime	GO pathway	GO:0042254	ribosome biogenesis	BP	309	9	0.027429	1
Dugue 2019	5606	NR	Cont	g/day overlifetime	GO pathway	GO:0000377	RNA splicing, via transesterification reactions with bulged adenosine as nucleophile	BP	309	9	0.027429	1
Dugue 2019	5606	NR	Cont	g/day overlifetime	GO pathway	GO:0000398	mRNA splicing, via spliceosome	BP	309	9	0.027429	1
Dugue 2019	5606	NR	Cont	g/day overlifetime	GO pathway	GO:0071901	negative regulation of protein serine/threonine kinase activity	BP	123	5	0.027481	1
Dugue 2019	5606	NR	Cont	g/day overlifetime	GO pathway	GO:0048745	smooth muscle tissue development	BP	19	2	0.027561	1
Dugue 2019	5606	NR	Cont	g/day overlifetime	GO pathway	GO:0033522	histone H2A ubiquitination	BP	19	2	0.027561	1
Dugue 2019	5606	NR	Cont	g/day overlifetime	GO pathway	GO:0046827	positive regulation of protein export from nucleus	BP	19	2	0.027561	1
Dugue 2019	5606	NR	Cont	g/day overlifetime	GO pathway	GO:0001891	phagocytic cup	CC	19	2	0.027561	1
Dugue 2019	5606	NR	Cont	g/day overlifetime	GO pathway	GO:0030506	ankyrin binding	MF	19	2	0.027561	1
Dugue 2019	5606	NR	Cont	g/day overlifetime	GO pathway	GO:0052745	inositol phosphate phosphatase activity	MF	19	2	0.027561	1
Dugue 2019	5606	NR	Cont	g/day overlifetime	GO pathway	GO:0044033	multi-organism metabolic process	BP	213	7	0.028096	1
Dugue 2019	5606	NR	Cont	g/day overlifetime	GO pathway	GO:0006418	tRNA aminoacylation for protein translation	BP	48	3	0.028147	1
Dugue 2019	5606	NR	Cont	g/day overlifetime	GO pathway	GO:0032210	regulation of telomere maintenance via telomerase	BP	48	3	0.028147	1
Dugue 2019	5606	NR	Cont	g/day overlifetime	GO pathway	GO:0000380	alternative mRNA splicing, via spliceosome	BP	48	3	0.028147	1
Dugue 2019	5606	NR	Cont	g/day overlifetime	GO pathway	GO:0000139	Golgi membrane	CC	687	16	0.028211	1
Dugue 2019	5606	NR	Cont	g/day overlifetime	GO pathway	GO:0021782	glial cell development	BP	84	4	0.02854	1
Dugue 2019	5606	NR	Cont	g/day overlifetime	GO pathway	GO:0048534	hematopoietic or lymphoid organ development	BP	745	17	0.0286	1
Dugue 2019	5606	NR	Cont	g/day overlifetime	GO pathway	GO:0009059	macromolecule biosynthetic process	BP	5023	83	0.02864	1
Dugue 2019	5606	NR	Cont	g/day overlifetime	GO pathway	GO:0000375	RNA splicing, via transesterification reactions	BP	312	9	0.028934	1
Dugue 2019	5606	NR	Cont	g/day overlifetime	GO pathway	GO:0042542	response to hydrogen peroxide	BP	125	5	0.029189	1
Dugue 2019	5606	NR	Cont	g/day overlifetime	GO pathway	GO:0051960	regulation of nervous system development	BP	747	17	0.029237	1
Dugue 2019	5606	NR	Cont	g/day overlifetime	GO pathway	GO:0046488	phosphatidylinositol metabolic process	BP	215	7	0.029353	1
Dugue 2019	5606	NR	Cont	g/day overlifetime	GO pathway	GO:0006820	anion transport	BP	579	14	0.029547	1
Dugue 2019	5606	NR	Cont	g/day overlifetime	GO pathway	GO:0051169	nuclear transport	BP	470	12	0.029609	1
Dugue 2019	5606	NR	Cont	g/day overlifetime	GO pathway	GO:0070265	necrotic cell death	BP	49	3	0.029686	1
Dugue 2019	5606	NR	Cont	g/day overlifetime	GO pathway	GO:0045834	positive regulation of lipid metabolic process	BP	126	5	0.030068	1
Dugue 2019	5606	NR	Cont	g/day overlifetime	GO pathway	GO:0002262	myeloid cell homeostasis	BP	126	5	0.030068	1
Dugue 2019	5606	NR	Cont	g/day overlifetime	GO pathway	GO:0044451	nucleoplasm part	CC	1043	22	0.030363	1
Dugue 2019	5606	NR	Cont	g/day overlifetime	GO pathway	GO:0071900	regulation of protein serine/threonine kinase activity	BP	472	12	0.030449	1
Dugue 2019	5606	NR	Cont	g/day overlifetime	GO pathway	GO:0036092	phosphatidylinositol-3-phosphate biosynthetic process	BP	50	3	0.03127	1
Dugue 2019	5606	NR	Cont	g/day overlifetime	GO pathway	GO:0004520	endodeoxyribonuclease activity	MF	50	3	0.03127	1
Dugue 2019	5606	NR	Cont	g/day overlifetime	GO pathway	GO:0017112	Rab guanyl-nucleotide exchange factor activity	MF	50	3	0.03127	1
Dugue 2019	5606	NR	Cont	g/day overlifetime	GO pathway	GO:0006518	peptide metabolic process	BP	754	17	0.031549	1
Dugue 2019	5606	NR	Cont	g/day overlifetime	GO pathway	GO:0031532	actin cytoskeleton reorganization	BP	87	4	0.031906	1
Dugue 2019	5606	NR	Cont	g/day overlifetime	GO pathway	GO:0042592	homeostatic process	BP	1599	31	0.031929	1
Dugue 2019	5606	NR	Cont	g/day overlifetime	GO pathway	GO:0050730	regulation of peptidyl-tyrosine phosphorylation	BP	219	7	0.031981	1
Dugue 2019	5606	NR	Cont	g/day overlifetime	GO pathway	GO:0030258	lipid modification	BP	268	8	0.032232	1
Dugue 2019	5606	NR	Cont	g/day overlifetime	GO pathway	GO:0016032	viral process	BP	932	20	0.032598	1
Dugue 2019	5606	NR	Cont	g/day overlifetime	GO pathway	GO:0000989	transcription factor activity, transcription factor binding	MF	587	14	0.032623	1
Dugue 2019	5606	NR	Cont	g/day overlifetime	GO pathway	GO:0000784	nuclear chromosome, telomeric region	CC	129	5	0.032803	1
Dugue 2019	5606	NR	Cont	g/day overlifetime	GO pathway	GO:0043039	tRNA aminoacylation	BP	51	3	0.032897	1
Dugue 2019	5606	NR	Cont	g/day overlifetime	GO pathway	GO:0044273	sulfur compound catabolic process	BP	51	3	0.032897	1
Dugue 2019	5606	NR	Cont	g/day overlifetime	GO pathway	GO:0019320	hexose catabolic process	BP	51	3	0.032897	1
Dugue 2019	5606	NR	Cont	g/day overlifetime	GO pathway	GO:0000186	activation of MAPKK activity	BP	51	3	0.032897	1
Dugue 2019	5606	NR	Cont	g/day overlifetime	GO pathway	GO:0050858	negative regulation of antigen receptor-mediated signaling pathway	BP	21	2	0.033246	1
Dugue 2019	5606	NR	Cont	g/day overlifetime	GO pathway	GO:0030149	sphingolipid catabolic process	BP	21	2	0.033246	1
Dugue 2019	5606	NR	Cont	g/day overlifetime	GO pathway	GO:0006402	mRNA catabolic process	BP	221	7	0.033352	1
Dugue 2019	5606	NR	Cont	g/day overlifetime	GO pathway	GO:0060322	head development	BP	702	16	0.033423	1
Dugue 2019	5606	NR	Cont	g/day overlifetime	GO pathway	GO:0008654	phospholipid biosynthetic process	BP	270	8	0.033461	1
Dugue 2019	5606	NR	Cont	g/day overlifetime	GO pathway	GO:0044712	single-organism catabolic process	BP	936	20	0.033866	1
Dugue 2019	5606	NR	Cont	g/day overlifetime	GO pathway	GO:0033036	macromolecule localization	BP	2830	50	0.033942	1
Dugue 2019	5606	NR	Cont	g/day overlifetime	GO pathway	GO:0071103	DNA conformation change	BP	271	8	0.034087	1
Dugue 2019	5606	NR	Cont	g/day overlifetime	GO pathway	GO:0030838	positive regulation of actin filament polymerization	BP	89	4	0.034274	1
Dugue 2019	5606	NR	Cont	g/day overlifetime	GO pathway	GO:0044764	multi-organism cellular process	BP	938	20	0.034513	1
Dugue 2019	5606	NR	Cont	g/day overlifetime	GO pathway	GO:0030097	hemopoiesis	BP	705	16	0.034545	1
Dugue 2019	5606	NR	Cont	g/day overlifetime	GO pathway	GO:0043038	amino acid activation	BP	52	3	0.034567	1
Dugue 2019	5606	NR	Cont	g/day overlifetime	GO pathway	GO:0010632	regulation of epithelial cell migration	BP	176	6	0.034897	1
Dugue 2019	5606	NR	Cont	g/day overlifetime	GO pathway	GO:0009749	response to glucose	BP	176	6	0.034897	1
Dugue 2019	5606	NR	Cont	g/day overlifetime	GO pathway	GO:1903311	regulation of mRNA metabolic process	BP	132	5	0.035688	1
Dugue 2019	5606	NR	Cont	g/day overlifetime	GO pathway	GO:0048869	cellular developmental process	BP	3909	66	0.035763	1
Dugue 2019	5606	NR	Cont	g/day overlifetime	GO pathway	GO:0010640	regulation of platelet-derived growth factor receptor signaling pathway	BP	22	2	0.036246	1
Dugue 2019	5606	NR	Cont	g/day overlifetime	GO pathway	GO:0090398	cellular senescence	BP	53	3	0.036281	1
Dugue 2019	5606	NR	Cont	g/day overlifetime	GO pathway	GO:0046928	regulation of neurotransmitter secretion	BP	53	3	0.036281	1
Dugue 2019	5606	NR	Cont	g/day overlifetime	GO pathway	GO:0015030	Cajal body	CC	53	3	0.036281	1
Dugue 2019	5606	NR	Cont	g/day overlifetime	GO pathway	GO:0051287	NAD binding	MF	53	3	0.036281	1
Dugue 2019	5606	NR	Cont	g/day overlifetime	GO pathway	GO:0000988	transcription factor activity, protein binding	MF	596	14	0.036355	1
Dugue 2019	5606	NR	Cont	g/day overlifetime	GO pathway	GO:0006611	protein export from nucleus	BP	178	6	0.036563	1
Dugue 2019	5606	NR	Cont	g/day overlifetime	GO pathway	GO:0019439	aromatic compound catabolic process	BP	432	11	0.036967	1
Dugue 2019	5606	NR	Cont	g/day overlifetime	GO pathway	GO:0034248	regulation of cellular amide metabolic process	BP	379	10	0.037165	1
Dugue 2019	5606	NR	Cont	g/day overlifetime	GO pathway	GO:0010810	regulation of cell-substrate adhesion	BP	179	6	0.037415	1
Dugue 2019	5606	NR	Cont	g/day overlifetime	GO pathway	GO:0007569	cell aging	BP	92	4	0.038014	1
Dugue 2019	5606	NR	Cont	g/day overlifetime	GO pathway	GO:0043202	lysosomal lumen	CC	92	4	0.038014	1
Dugue 2019	5606	NR	Cont	g/day overlifetime	GO pathway	GO:0044391	ribosomal subunit	CC	180	6	0.03828	1
Dugue 2019	5606	NR	Cont	g/day overlifetime	GO pathway	GO:0008150	biological_process	BP	16360	233	0.038495	1
Dugue 2019	5606	NR	Cont	g/day overlifetime	GO pathway	GO:0031323	regulation of cellular metabolic process	BP	5786	93	0.038539	1
Dugue 2019	5606	NR	Cont	g/day overlifetime	GO pathway	GO:0051338	regulation of transferase activity	BP	950	20	0.038593	1
Dugue 2019	5606	NR	Cont	g/day overlifetime	GO pathway	GO:0051302	regulation of cell division	BP	135	5	0.038726	1
Dugue 2019	5606	NR	Cont	g/day overlifetime	GO pathway	GO:0009746	response to hexose	BP	181	6	0.039157	1
Dugue 2019	5606	NR	Cont	g/day overlifetime	GO pathway	GO:0030099	myeloid cell differentiation	BP	330	9	0.039193	1
Dugue 2019	5606	NR	Cont	g/day overlifetime	GO pathway	GO:0010631	epithelial cell migration	BP	229	7	0.039226	1
Dugue 2019	5606	NR	Cont	g/day overlifetime	GO pathway	GO:0009062	fatty acid catabolic process	BP	93	4	0.03931	1
Dugue 2019	5606	NR	Cont	g/day overlifetime	GO pathway	GO:0001919	regulation of receptor recycling	BP	23	2	0.039345	1
Dugue 2019	5606	NR	Cont	g/day overlifetime	GO pathway	GO:0060444	branching involved in mammary gland duct morphogenesis	BP	23	2	0.039345	1
Dugue 2019	5606	NR	Cont	g/day overlifetime	GO pathway	GO:0008210	estrogen metabolic process	BP	23	2	0.039345	1
Dugue 2019	5606	NR	Cont	g/day overlifetime	GO pathway	GO:0046835	carbohydrate phosphorylation	BP	23	2	0.039345	1
Dugue 2019	5606	NR	Cont	g/day overlifetime	GO pathway	GO:0042611	MHC protein complex	CC	23	2	0.039345	1
Dugue 2019	5606	NR	Cont	g/day overlifetime	GO pathway	GO:0016769	transferase activity, transferring nitrogenous groups	MF	23	2	0.039345	1
Dugue 2019	5606	NR	Cont	g/day overlifetime	GO pathway	GO:0051019	mitogen-activated protein kinase binding	MF	23	2	0.039345	1
Dugue 2019	5606	NR	Cont	g/day overlifetime	GO pathway	GO:0042605	peptide antigen binding	MF	23	2	0.039345	1
Dugue 2019	5606	NR	Cont	g/day overlifetime	GO pathway	GO:0030424	axon	CC	383	10	0.039453	1
Dugue 2019	5606	NR	Cont	g/day overlifetime	GO pathway	GO:0007417	central nervous system development	BP	893	19	0.039471	1
Dugue 2019	5606	NR	Cont	g/day overlifetime	GO pathway	GO:0022613	ribonucleoprotein complex biogenesis	BP	437	11	0.039629	1
Dugue 2019	5606	NR	Cont	g/day overlifetime	GO pathway	GO:0048513	animal organ development	BP	3191	55	0.039753	1
Dugue 2019	5606	NR	Cont	g/day overlifetime	GO pathway	GO:0008104	protein localization	BP	2530	45	0.039762	1
Dugue 2019	5606	NR	Cont	g/day overlifetime	GO pathway	GO:0061515	myeloid cell development	BP	55	3	0.039836	1
Dugue 2019	5606	NR	Cont	g/day overlifetime	GO pathway	GO:0030659	cytoplasmic vesicle membrane	CC	719	16	0.040149	1
Dugue 2019	5606	NR	Cont	g/day overlifetime	GO pathway	GO:0003705	transcription factor activity, RNA polymerase II distal enhancer sequence-specific binding	MF	94	4	0.040631	1
Dugue 2019	5606	NR	Cont	g/day overlifetime	GO pathway	GO:0002428	antigen processing and presentation of peptide antigen via MHC class Ib	BP	3	1	0.040651	1
Dugue 2019	5606	NR	Cont	g/day overlifetime	GO pathway	GO:1902445	regulation of mitochondrial membrane permeability involved in programmed necrotic cell death	BP	3	1	0.040651	1
Dugue 2019	5606	NR	Cont	g/day overlifetime	GO pathway	GO:0043696	dedifferentiation	BP	3	1	0.040651	1
Dugue 2019	5606	NR	Cont	g/day overlifetime	GO pathway	GO:0043697	cell dedifferentiation	BP	3	1	0.040651	1
Dugue 2019	5606	NR	Cont	g/day overlifetime	GO pathway	GO:0035986	senescence-associated heterochromatin focus assembly	BP	3	1	0.040651	1
Dugue 2019	5606	NR	Cont	g/day overlifetime	GO pathway	GO:0060414	aorta smooth muscle tissue morphogenesis	BP	3	1	0.040651	1
Dugue 2019	5606	NR	Cont	g/day overlifetime	GO pathway	GO:0045764	positive regulation of cellular amino acid metabolic process	BP	3	1	0.040651	1
Dugue 2019	5606	NR	Cont	g/day overlifetime	GO pathway	GO:0043137	DNA replication, removal of RNA primer	BP	3	1	0.040651	1
Dugue 2019	5606	NR	Cont	g/day overlifetime	GO pathway	GO:0032289	central nervous system myelin formation	BP	3	1	0.040651	1
Dugue 2019	5606	NR	Cont	g/day overlifetime	GO pathway	GO:0015960	diadenosine polyphosphate biosynthetic process	BP	3	1	0.040651	1
Dugue 2019	5606	NR	Cont	g/day overlifetime	GO pathway	GO:0015965	diadenosine tetraphosphate metabolic process	BP	3	1	0.040651	1
Dugue 2019	5606	NR	Cont	g/day overlifetime	GO pathway	GO:0015966	diadenosine tetraphosphate biosynthetic process	BP	3	1	0.040651	1
Dugue 2019	5606	NR	Cont	g/day overlifetime	GO pathway	GO:0010481	epidermal cell division	BP	3	1	0.040651	1
Dugue 2019	5606	NR	Cont	g/day overlifetime	GO pathway	GO:0010482	regulation of epidermal cell division	BP	3	1	0.040651	1
Dugue 2019	5606	NR	Cont	g/day overlifetime	GO pathway	GO:0031587	positive regulation of inositol 1,4,5-trisphosphate-sensitive calcium-release channel activity	BP	3	1	0.040651	1
Dugue 2019	5606	NR	Cont	g/day overlifetime	GO pathway	GO:1900748	positive regulation of vascular endothelial growth factor signaling pathway	BP	3	1	0.040651	1
Dugue 2019	5606	NR	Cont	g/day overlifetime	GO pathway	GO:0032252	secretory granule localization	BP	3	1	0.040651	1
Dugue 2019	5606	NR	Cont	g/day overlifetime	GO pathway	GO:0016259	selenocysteine metabolic process	BP	3	1	0.040651	1
Dugue 2019	5606	NR	Cont	g/day overlifetime	GO pathway	GO:0031627	telomeric loop formation	BP	3	1	0.040651	1
Dugue 2019	5606	NR	Cont	g/day overlifetime	GO pathway	GO:1904533	regulation of telomeric loop disassembly	BP	3	1	0.040651	1
Dugue 2019	5606	NR	Cont	g/day overlifetime	GO pathway	GO:1904430	negative regulation of t-circle formation	BP	3	1	0.040651	1
Dugue 2019	5606	NR	Cont	g/day overlifetime	GO pathway	GO:0010693	negative regulation of alkaline phosphatase activity	BP	3	1	0.040651	1
Dugue 2019	5606	NR	Cont	g/day overlifetime	GO pathway	GO:0033183	negative regulation of histone ubiquitination	BP	3	1	0.040651	1
Dugue 2019	5606	NR	Cont	g/day overlifetime	GO pathway	GO:1901314	regulation of histone H2A K63-linked ubiquitination	BP	3	1	0.040651	1
Dugue 2019	5606	NR	Cont	g/day overlifetime	GO pathway	GO:1901315	negative regulation of histone H2A K63-linked ubiquitination	BP	3	1	0.040651	1
Dugue 2019	5606	NR	Cont	g/day overlifetime	GO pathway	GO:0006566	threonine metabolic process	BP	3	1	0.040651	1
Dugue 2019	5606	NR	Cont	g/day overlifetime	GO pathway	GO:0060912	cardiac cell fate specification	BP	3	1	0.040651	1
Dugue 2019	5606	NR	Cont	g/day overlifetime	GO pathway	GO:0015783	GDP-fucose transport	BP	3	1	0.040651	1
Dugue 2019	5606	NR	Cont	g/day overlifetime	GO pathway	GO:0036079	purine nucleotide-sugar transport	BP	3	1	0.040651	1
Dugue 2019	5606	NR	Cont	g/day overlifetime	GO pathway	GO:0032807	DNA ligase IV complex	CC	3	1	0.040651	1
Dugue 2019	5606	NR	Cont	g/day overlifetime	GO pathway	GO:0060171	stereocilium membrane	CC	3	1	0.040651	1
Dugue 2019	5606	NR	Cont	g/day overlifetime	GO pathway	GO:1990635	proximal dendrite	CC	3	1	0.040651	1
Dugue 2019	5606	NR	Cont	g/day overlifetime	GO pathway	GO:0033565	ESCRT-0 complex	CC	3	1	0.040651	1
Dugue 2019	5606	NR	Cont	g/day overlifetime	GO pathway	GO:0000814	ESCRT II complex	CC	3	1	0.040651	1
Dugue 2019	5606	NR	Cont	g/day overlifetime	GO pathway	GO:0003976	UDP-N-acetylglucosamine-lysosomal-enzyme N-acetylglucosaminephosphotransferase activity	MF	3	1	0.040651	1
Dugue 2019	5606	NR	Cont	g/day overlifetime	GO pathway	GO:0008330	protein tyrosine/threonine phosphatase activity	MF	3	1	0.040651	1
Dugue 2019	5606	NR	Cont	g/day overlifetime	GO pathway	GO:0070051	fibrinogen binding	MF	3	1	0.040651	1
Dugue 2019	5606	NR	Cont	g/day overlifetime	GO pathway	GO:0008426	protein kinase C inhibitor activity	MF	3	1	0.040651	1
Dugue 2019	5606	NR	Cont	g/day overlifetime	GO pathway	GO:0030369	ICAM-3 receptor activity	MF	3	1	0.040651	1
Dugue 2019	5606	NR	Cont	g/day overlifetime	GO pathway	GO:0030144	alpha-1,6-mannosylglycoprotein 6-beta-N-acetylglucosaminyltransferase activity	MF	3	1	0.040651	1
Dugue 2019	5606	NR	Cont	g/day overlifetime	GO pathway	GO:0005166	neurotrophin p75 receptor binding	MF	3	1	0.040651	1
Dugue 2019	5606	NR	Cont	g/day overlifetime	GO pathway	GO:0048403	brain-derived neurotrophic factor binding	MF	3	1	0.040651	1
Dugue 2019	5606	NR	Cont	g/day overlifetime	GO pathway	GO:0016309	1-phosphatidylinositol-5-phosphate 4-kinase activity	MF	3	1	0.040651	1
Dugue 2019	5606	NR	Cont	g/day overlifetime	GO pathway	GO:1990932	5.8S rRNA binding	MF	3	1	0.040651	1
Dugue 2019	5606	NR	Cont	g/day overlifetime	GO pathway	GO:0005294	neutral L-amino acid secondary active transmembrane transporter activity	MF	3	1	0.040651	1
Dugue 2019	5606	NR	Cont	g/day overlifetime	GO pathway	GO:0005457	GDP-fucose transmembrane transporter activity	MF	3	1	0.040651	1
Dugue 2019	5606	NR	Cont	g/day overlifetime	GO pathway	GO:0036080	purine nucleotide-sugar transmembrane transporter activity	MF	3	1	0.040651	1
Dugue 2019	5606	NR	Cont	g/day overlifetime	GO pathway	GO:0090132	epithelium migration	BP	231	7	0.040794	1
Dugue 2019	5606	NR	Cont	g/day overlifetime	GO pathway	GO:0019318	hexose metabolic process	BP	231	7	0.040794	1
Dugue 2019	5606	NR	Cont	g/day overlifetime	GO pathway	GO:0098862	cluster of actin-based cell projections	CC	137	5	0.040836	1
Dugue 2019	5606	NR	Cont	g/day overlifetime	GO pathway	GO:0032403	protein complex binding	MF	722	16	0.041431	1
Dugue 2019	5606	NR	Cont	g/day overlifetime	GO pathway	GO:0044711	single-organism biosynthetic process	BP	1448	28	0.041611	1
Dugue 2019	5606	NR	Cont	g/day overlifetime	GO pathway	GO:0012507	ER to Golgi transport vesicle membrane	CC	56	3	0.041678	1
Dugue 2019	5606	NR	Cont	g/day overlifetime	GO pathway	GO:0045184	establishment of protein localization	BP	2085	38	0.042148	1
Dugue 2019	5606	NR	Cont	g/day overlifetime	GO pathway	GO:0006897	endocytosis	BP	609	14	0.042276	1
Dugue 2019	5606	NR	Cont	g/day overlifetime	GO pathway	GO:0014002	astrocyte development	BP	24	2	0.042541	1
Dugue 2019	5606	NR	Cont	g/day overlifetime	GO pathway	GO:0050685	positive regulation of mRNA processing	BP	24	2	0.042541	1
Dugue 2019	5606	NR	Cont	g/day overlifetime	GO pathway	GO:0046466	membrane lipid catabolic process	BP	24	2	0.042541	1
Dugue 2019	5606	NR	Cont	g/day overlifetime	GO pathway	GO:0042974	retinoic acid receptor binding	MF	24	2	0.042541	1
Dugue 2019	5606	NR	Cont	g/day overlifetime	GO pathway	GO:0008514	organic anion transmembrane transporter activity	MF	185	6	0.042793	1
Dugue 2019	5606	NR	Cont	g/day overlifetime	GO pathway	GO:0033043	regulation of organelle organization	BP	1143	23	0.042815	1
Dugue 2019	5606	NR	Cont	g/day overlifetime	GO pathway	GO:0021537	telencephalon development	BP	234	7	0.043222	1
Dugue 2019	5606	NR	Cont	g/day overlifetime	GO pathway	GO:0005903	brush border	CC	96	4	0.043349	1
Dugue 2019	5606	NR	Cont	g/day overlifetime	GO pathway	GO:0006996	organelle organization	BP	3612	61	0.043528	1
Dugue 2019	5606	NR	Cont	g/day overlifetime	GO pathway	GO:0006644	phospholipid metabolic process	BP	444	11	0.043576	1
Dugue 2019	5606	NR	Cont	g/day overlifetime	GO pathway	GO:0007420	brain development	BP	669	15	0.043586	1
Dugue 2019	5606	NR	Cont	g/day overlifetime	GO pathway	GO:0034284	response to monosaccharide	BP	186	6	0.043735	1
Dugue 2019	5606	NR	Cont	g/day overlifetime	GO pathway	GO:0002520	immune system development	BP	786	17	0.043874	1
Dugue 2019	5606	NR	Cont	g/day overlifetime	GO pathway	GO:1901576	organic substance biosynthetic process	BP	6100	97	0.044112	1
Dugue 2019	5606	NR	Cont	g/day overlifetime	GO pathway	GO:0010720	positive regulation of cell development	BP	445	11	0.044161	1
Dugue 2019	5606	NR	Cont	g/day overlifetime	GO pathway	GO:0051962	positive regulation of nervous system development	BP	445	11	0.044161	1
Dugue 2019	5606	NR	Cont	g/day overlifetime	GO pathway	GO:0006413	translational initiation	BP	187	6	0.044689	1
Dugue 2019	5606	NR	Cont	g/day overlifetime	GO pathway	GO:0043549	regulation of kinase activity	BP	788	17	0.044745	1
Dugue 2019	5606	NR	Cont	g/day overlifetime	GO pathway	GO:0008565	protein transporter activity	MF	97	4	0.044746	1
Dugue 2019	5606	NR	Cont	g/day overlifetime	GO pathway	GO:0050900	leukocyte migration	BP	392	10	0.044954	1
Dugue 2019	5606	NR	Cont	g/day overlifetime	GO pathway	GO:0003690	double-stranded DNA binding	MF	730	16	0.044993	1
Dugue 2019	5606	NR	Cont	g/day overlifetime	GO pathway	GO:0002376	immune system process	BP	2618	46	0.045022	1
Dugue 2019	5606	NR	Cont	g/day overlifetime	GO pathway	GO:0008283	cell proliferation	BP	1904	35	0.045393	1
Dugue 2019	5606	NR	Cont	g/day overlifetime	GO pathway	GO:0001933	negative regulation of protein phosphorylation	BP	393	10	0.045596	1
Dugue 2019	5606	NR	Cont	g/day overlifetime	GO pathway	GO:0090130	tissue migration	BP	237	7	0.045741	1
Dugue 2019	5606	NR	Cont	g/day overlifetime	GO pathway	GO:0032148	activation of protein kinase B activity	BP	25	2	0.045831	1
Dugue 2019	5606	NR	Cont	g/day overlifetime	GO pathway	GO:0021591	ventricular system development	BP	25	2	0.045831	1
Dugue 2019	5606	NR	Cont	g/day overlifetime	GO pathway	GO:0016891	endoribonuclease activity, producing 5'-phosphomonoesters	MF	25	2	0.045831	1
Dugue 2019	5606	NR	Cont	g/day overlifetime	GO pathway	GO:0030182	neuron differentiation	BP	1213	24	0.045897	1
Dugue 2019	5606	NR	Cont	g/day overlifetime	GO pathway	GO:0006260	DNA replication	BP	288	8	0.045977	1
Dugue 2019	5606	NR	Cont	g/day overlifetime	GO pathway	GO:0006469	negative regulation of protein kinase activity	BP	238	7	0.046601	1
Dugue 2019	5606	NR	Cont	g/day overlifetime	GO pathway	GO:0022618	ribonucleoprotein complex assembly	BP	189	6	0.046636	1
Dugue 2019	5606	NR	Cont	g/day overlifetime	GO pathway	GO:0031324	negative regulation of cellular metabolic process	BP	2362	42	0.046655	1
Dugue 2019	5606	NR	Cont	g/day overlifetime	GO pathway	GO:0010975	regulation of neuron projection development	BP	395	10	0.046898	1
Dugue 2019	5606	NR	Cont	g/day overlifetime	GO pathway	GO:0044403	symbiosis, encompassing mutualism through parasitism	BP	972	20	0.046982	1
Dugue 2019	5606	NR	Cont	g/day overlifetime	GO pathway	GO:0006417	regulation of translation	BP	342	9	0.047265	1
Dugue 2019	5606	NR	Cont	g/day overlifetime	GO pathway	GO:0006650	glycerophospholipid metabolic process	BP	342	9	0.047265	1
Dugue 2019	5606	NR	Cont	g/day overlifetime	GO pathway	GO:0012506	vesicle membrane	CC	735	16	0.047327	1
Dugue 2019	5606	NR	Cont	g/day overlifetime	GO pathway	GO:1902117	positive regulation of organelle assembly	BP	59	3	0.047455	1
Dugue 2019	5606	NR	Cont	g/day overlifetime	GO pathway	GO:0046854	phosphatidylinositol phosphorylation	BP	99	4	0.047613	1
Dugue 2019	5606	NR	Cont	g/day overlifetime	GO pathway	GO:0044419	interspecies interaction between organisms	BP	974	20	0.047805	1
Dugue 2019	5606	NR	Cont	g/day overlifetime	GO pathway	GO:0070207	protein homotrimerization	BP	26	2	0.049211	1
Dugue 2019	5606	NR	Cont	g/day overlifetime	GO pathway	GO:0010665	regulation of cardiac muscle cell apoptotic process	BP	26	2	0.049211	1
Dugue 2019	5606	NR	Cont	g/day overlifetime	GO pathway	GO:0048011	neurotrophin TRK receptor signaling pathway	BP	26	2	0.049211	1
Dugue 2019	5606	NR	Cont	g/day overlifetime	GO pathway	GO:1900078	positive regulation of cellular response to insulin stimulus	BP	26	2	0.049211	1
Dugue 2019	5606	NR	Cont	g/day overlifetime	GO pathway	GO:0006735	NADH regeneration	BP	26	2	0.049211	1
Dugue 2019	5606	NR	Cont	g/day overlifetime	GO pathway	GO:0061621	canonical glycolysis	BP	26	2	0.049211	1
Dugue 2019	5606	NR	Cont	g/day overlifetime	GO pathway	GO:0061718	glucose catabolic process to pyruvate	BP	26	2	0.049211	1
Dugue 2019	5606	NR	Cont	g/day overlifetime	GO pathway	GO:0036452	ESCRT complex	CC	26	2	0.049211	1
Dugue 2019	5606	NR	Cont	g/day overlifetime	GO pathway	GO:0009890	negative regulation of biosynthetic process	BP	1472	28	0.049406	1
Dugue 2019	5606	NR	Cont	g/day overlifetime	GO pathway	GO:0046365	monosaccharide catabolic process	BP	60	3	0.049464	1
Dugue 2019	5606	NR	Cont	g/day overlifetime	GO pathway	GO:0035195	gene silencing by miRNA	BP	60	3	0.049464	1
Dugue 2019	5606	NR	Cont	g/day overlifetime	GO pathway	GO:0030101	natural killer cell activation	BP	60	3	0.049464	1
Dugue 2019	5606	NR	Cont	g/day overlifetime	GO pathway	GO:0006006	glucose metabolic process	BP	192	6	0.049654	1
Dugue 2019	5606	NR	Cont	g/day in last week	GO pathway	GO:0010629	negative regulation of gene expression	BP	1620	135	5.1e-11	1.11e-06
Dugue 2019	5606	NR	Cont	g/day in last week	GO pathway	GO:1901363	heterocyclic compound binding	MF	5727	358	2.05e-10	2.23e-06
Dugue 2019	5606	NR	Cont	g/day in last week	GO pathway	GO:0048518	positive regulation of biological process	BP	5164	327	5.58e-10	3.16e-06
Dugue 2019	5606	NR	Cont	g/day in last week	GO pathway	GO:0097159	organic cyclic compound binding	MF	5811	359	8.99e-10	3.16e-06
Dugue 2019	5606	NR	Cont	g/day in last week	GO pathway	GO:0005488	binding	MF	13850	729	9.3e-10	3.16e-06
Dugue 2019	5606	NR	Cont	g/day in last week	GO pathway	GO:0010605	negative regulation of macromolecule metabolic process	BP	2446	179	1.07e-09	3.16e-06
Dugue 2019	5606	NR	Cont	g/day in last week	GO pathway	GO:0009892	negative regulation of metabolic process	BP	2676	192	1.1e-09	3.16e-06
Dugue 2019	5606	NR	Cont	g/day in last week	GO pathway	GO:0003676	nucleic acid binding	MF	3880	258	1.16e-09	3.16e-06
Dugue 2019	5606	NR	Cont	g/day in last week	GO pathway	GO:0048522	positive regulation of cellular process	BP	4645	297	2.28e-09	5.53e-06
Dugue 2019	5606	NR	Cont	g/day in last week	GO pathway	GO:0003723	RNA binding	MF	1581	125	7.7e-09	1.68e-05
Dugue 2019	5606	NR	Cont	g/day in last week	GO pathway	GO:0043604	amide biosynthetic process	BP	692	68	1.06e-08	2.09e-05
Dugue 2019	5606	NR	Cont	g/day in last week	GO pathway	GO:0006412	translation	BP	596	60	3.38e-08	6.14e-05
Dugue 2019	5606	NR	Cont	g/day in last week	GO pathway	GO:0048731	system development	BP	4377	276	4.98e-08	8.35e-05
Dugue 2019	5606	NR	Cont	g/day in last week	GO pathway	GO:0043043	peptide biosynthetic process	BP	619	61	5.61e-08	8.35e-05
Dugue 2019	5606	NR	Cont	g/day in last week	GO pathway	GO:0043603	cellular amide metabolic process	BP	905	80	5.74e-08	8.35e-05
Dugue 2019	5606	NR	Cont	g/day in last week	GO pathway	GO:0051172	negative regulation of nitrogen compound metabolic process	BP	1493	116	7.5e-08	0.000102
Dugue 2019	5606	NR	Cont	g/day in last week	GO pathway	GO:0016071	mRNA metabolic process	BP	684	65	8e-08	0.000103
Dugue 2019	5606	NR	Cont	g/day in last week	GO pathway	GO:0019222	regulation of metabolic process	BP	6196	367	9.94e-08	0.00012
Dugue 2019	5606	NR	Cont	g/day in last week	GO pathway	GO:0048856	anatomical structure development	BP	5376	325	1.33e-07	0.000152
Dugue 2019	5606	NR	Cont	g/day in last week	GO pathway	GO:0030529	intracellular ribonucleoprotein complex	CC	774	70	1.72e-07	0.000179
Dugue 2019	5606	NR	Cont	g/day in last week	GO pathway	GO:0060255	regulation of macromolecule metabolic process	BP	5747	343	1.77e-07	0.000179
Dugue 2019	5606	NR	Cont	g/day in last week	GO pathway	GO:1990904	ribonucleoprotein complex	CC	775	70	1.8e-07	0.000179
Dugue 2019	5606	NR	Cont	g/day in last week	GO pathway	GO:0007275	multicellular organism development	BP	4934	301	2.35e-07	0.000222
Dugue 2019	5606	NR	Cont	g/day in last week	GO pathway	GO:0048519	negative regulation of biological process	BP	4709	289	2.79e-07	0.000251
Dugue 2019	5606	NR	Cont	g/day in last week	GO pathway	GO:0006518	peptide metabolic process	BP	754	68	2.88e-07	0.000251
Dugue 2019	5606	NR	Cont	g/day in last week	GO pathway	GO:0007156	homophilic cell adhesion via plasma membrane adhesion molecules	BP	155	24	3.18e-07	0.000267
Dugue 2019	5606	NR	Cont	g/day in last week	GO pathway	GO:0010468	regulation of gene expression	BP	4317	268	3.7e-07	0.000298
Dugue 2019	5606	NR	Cont	g/day in last week	GO pathway	GO:0031324	negative regulation of cellular metabolic process	BP	2362	163	3.82e-07	0.000298
Dugue 2019	5606	NR	Cont	g/day in last week	GO pathway	GO:0044707	single-multicellular organism process	BP	5989	352	5.72e-07	0.000418
Dugue 2019	5606	NR	Cont	g/day in last week	GO pathway	GO:0044767	single-organism developmental process	BP	5690	337	5.75e-07	0.000418
Dugue 2019	5606	NR	Cont	g/day in last week	GO pathway	GO:0048583	regulation of response to stimulus	BP	3537	225	8.47e-07	0.000577
Dugue 2019	5606	NR	Cont	g/day in last week	GO pathway	GO:0002480	antigen processing and presentation of exogenous peptide antigen via MHC class I, TAP-independent	BP	9	6	8.47e-07	0.000577
Dugue 2019	5606	NR	Cont	g/day in last week	GO pathway	GO:0006413	translational initiation	BP	187	26	8.91e-07	0.000588
Dugue 2019	5606	NR	Cont	g/day in last week	GO pathway	GO:0044428	nuclear part	CC	4170	258	9.36e-07	0.000588
Dugue 2019	5606	NR	Cont	g/day in last week	GO pathway	GO:2000113	negative regulation of cellular macromolecule biosynthetic process	BP	1297	100	9.44e-07	0.000588
Dugue 2019	5606	NR	Cont	g/day in last week	GO pathway	GO:0043167	ion binding	MF	5943	348	1.06e-06	0.00064
Dugue 2019	5606	NR	Cont	g/day in last week	GO pathway	GO:0023052	signaling	BP	6007	351	1.13e-06	0.000667
Dugue 2019	5606	NR	Cont	g/day in last week	GO pathway	GO:0009890	negative regulation of biosynthetic process	BP	1472	110	1.16e-06	0.000668
Dugue 2019	5606	NR	Cont	g/day in last week	GO pathway	GO:0032502	developmental process	BP	5777	339	1.35e-06	0.000756
Dugue 2019	5606	NR	Cont	g/day in last week	GO pathway	GO:1901566	organonitrogen compound biosynthetic process	BP	1359	103	1.4e-06	0.000758
Dugue 2019	5606	NR	Cont	g/day in last week	GO pathway	GO:0044700	single organism signaling	BP	6000	350	1.42e-06	0.000758
Dugue 2019	5606	NR	Cont	g/day in last week	GO pathway	GO:0000122	negative regulation of transcription from RNA polymerase II promoter	BP	743	65	1.53e-06	0.000789
Dugue 2019	5606	NR	Cont	g/day in last week	GO pathway	GO:0010558	negative regulation of macromolecule biosynthetic process	BP	1379	104	1.56e-06	0.000789
Dugue 2019	5606	NR	Cont	g/day in last week	GO pathway	GO:0048523	negative regulation of cellular process	BP	4258	261	1.71e-06	0.000848
Dugue 2019	5606	NR	Cont	g/day in last week	GO pathway	GO:0031327	negative regulation of cellular biosynthetic process	BP	1451	108	1.77e-06	0.00086
Dugue 2019	5606	NR	Cont	g/day in last week	GO pathway	GO:0005634	nucleus	CC	6829	390	2.02e-06	0.000958
Dugue 2019	5606	NR	Cont	g/day in last week	GO pathway	GO:0007399	nervous system development	BP	2178	149	2.25e-06	0.001045
Dugue 2019	5606	NR	Cont	g/day in last week	GO pathway	GO:0034340	response to type I interferon	BP	76	15	2.41e-06	0.001093
Dugue 2019	5606	NR	Cont	g/day in last week	GO pathway	GO:0010608	posttranscriptional regulation of gene expression	BP	467	46	2.51e-06	0.001116
Dugue 2019	5606	NR	Cont	g/day in last week	GO pathway	GO:0031981	nuclear lumen	CC	3818	237	2.58e-06	0.001126
Dugue 2019	5606	NR	Cont	g/day in last week	GO pathway	GO:0006613	cotranslational protein targeting to membrane	BP	97	17	2.94e-06	0.001257
Dugue 2019	5606	NR	Cont	g/day in last week	GO pathway	GO:0007154	cell communication	BP	6024	349	3.05e-06	0.001278
Dugue 2019	5606	NR	Cont	g/day in last week	GO pathway	GO:0006401	RNA catabolic process	BP	251	30	3.37e-06	0.001387
Dugue 2019	5606	NR	Cont	g/day in last week	GO pathway	GO:0005515	protein binding	MF	10696	572	3.44e-06	0.001389
Dugue 2019	5606	NR	Cont	g/day in last week	GO pathway	GO:0043227	membrane-bounded organelle	CC	11887	626	3.54e-06	0.001402
Dugue 2019	5606	NR	Cont	g/day in last week	GO pathway	GO:0000184	nuclear-transcribed mRNA catabolic process, nonsense-mediated decay	BP	120	19	3.78e-06	0.001473
Dugue 2019	5606	NR	Cont	g/day in last week	GO pathway	GO:0002376	immune system process	BP	2618	172	3.89e-06	0.001487
Dugue 2019	5606	NR	Cont	g/day in last week	GO pathway	GO:0036464	cytoplasmic ribonucleoprotein granule	CC	178	24	4.02e-06	0.001511
Dugue 2019	5606	NR	Cont	g/day in last week	GO pathway	GO:0034248	regulation of cellular amide metabolic process	BP	379	39	5.19e-06	0.00192
Dugue 2019	5606	NR	Cont	g/day in last week	GO pathway	GO:0045934	negative regulation of nucleobase-containing compound metabolic process	BP	1350	100	5.49e-06	0.001998
Dugue 2019	5606	NR	Cont	g/day in last week	GO pathway	GO:0043231	intracellular membrane-bounded organelle	CC	10188	547	5.8e-06	0.002074
Dugue 2019	5606	NR	Cont	g/day in last week	GO pathway	GO:0060337	type I interferon signaling pathway	BP	72	14	6.24e-06	0.002137
Dugue 2019	5606	NR	Cont	g/day in last week	GO pathway	GO:0071357	cellular response to type I interferon	BP	72	14	6.24e-06	0.002137
Dugue 2019	5606	NR	Cont	g/day in last week	GO pathway	GO:0006614	SRP-dependent cotranslational protein targeting to membrane	BP	92	16	6.34e-06	0.002137
Dugue 2019	5606	NR	Cont	g/day in last week	GO pathway	GO:0040029	regulation of gene expression, epigenetic	BP	259	30	6.37e-06	0.002137
Dugue 2019	5606	NR	Cont	g/day in last week	GO pathway	GO:0030055	cell-substrate junction	CC	397	40	6.57e-06	0.002165
Dugue 2019	5606	NR	Cont	g/day in last week	GO pathway	GO:0043565	sequence-specific DNA binding	MF	954	76	6.65e-06	0.002165
Dugue 2019	5606	NR	Cont	g/day in last week	GO pathway	GO:0051253	negative regulation of RNA metabolic process	BP	1204	91	6.83e-06	0.002185
Dugue 2019	5606	NR	Cont	g/day in last week	GO pathway	GO:0003690	double-stranded DNA binding	MF	730	62	6.91e-06	0.002185
Dugue 2019	5606	NR	Cont	g/day in last week	GO pathway	GO:0006417	regulation of translation	BP	342	36	7.18e-06	0.002236
Dugue 2019	5606	NR	Cont	g/day in last week	GO pathway	GO:0005829	cytosol	CC	4712	280	8.2e-06	0.002506
Dugue 2019	5606	NR	Cont	g/day in last week	GO pathway	GO:0005509	calcium ion binding	MF	687	59	8.27e-06	0.002506
Dugue 2019	5606	NR	Cont	g/day in last week	GO pathway	GO:0005925	focal adhesion	CC	389	39	9.6e-06	0.002869
Dugue 2019	5606	NR	Cont	g/day in last week	GO pathway	GO:0045892	negative regulation of transcription, DNA-templated	BP	1100	84	1.08e-05	0.003177
Dugue 2019	5606	NR	Cont	g/day in last week	GO pathway	GO:0035770	ribonucleoprotein granule	CC	189	24	1.14e-05	0.003295
Dugue 2019	5606	NR	Cont	g/day in last week	GO pathway	GO:0005924	cell-substrate adherens junction	CC	392	39	1.15e-05	0.003295
Dugue 2019	5606	NR	Cont	g/day in last week	GO pathway	GO:0000956	nuclear-transcribed mRNA catabolic process	BP	202	25	1.18e-05	0.003319
Dugue 2019	5606	NR	Cont	g/day in last week	GO pathway	GO:0034249	negative regulation of cellular amide metabolic process	BP	165	22	1.2e-05	0.003319
Dugue 2019	5606	NR	Cont	g/day in last week	GO pathway	GO:0098742	cell-cell adhesion via plasma-membrane adhesion molecules	BP	228	27	1.22e-05	0.003319
Dugue 2019	5606	NR	Cont	g/day in last week	GO pathway	GO:0050789	regulation of biological process	BP	10562	562	1.23e-05	0.003319
Dugue 2019	5606	NR	Cont	g/day in last week	GO pathway	GO:0000976	transcription regulatory region sequence-specific DNA binding	MF	618	54	1.23e-05	0.003319
Dugue 2019	5606	NR	Cont	g/day in last week	GO pathway	GO:0001775	cell activation	BP	1275	94	1.3e-05	0.00342
Dugue 2019	5606	NR	Cont	g/day in last week	GO pathway	GO:0048534	hematopoietic or lymphoid organ development	BP	745	62	1.3e-05	0.00342
Dugue 2019	5606	NR	Cont	g/day in last week	GO pathway	GO:0001067	regulatory region nucleic acid binding	MF	778	64	1.36e-05	0.003524
Dugue 2019	5606	NR	Cont	g/day in last week	GO pathway	GO:1903507	negative regulation of nucleic acid-templated transcription	BP	1141	86	1.38e-05	0.003539
Dugue 2019	5606	NR	Cont	g/day in last week	GO pathway	GO:0009966	regulation of signal transduction	BP	2695	173	1.44e-05	0.003656
Dugue 2019	5606	NR	Cont	g/day in last week	GO pathway	GO:1990837	sequence-specific double-stranded DNA binding	MF	654	56	1.53e-05	0.003838
Dugue 2019	5606	NR	Cont	g/day in last week	GO pathway	GO:0019900	kinase binding	MF	609	53	1.66e-05	0.004068
Dugue 2019	5606	NR	Cont	g/day in last week	GO pathway	GO:0031323	regulation of cellular metabolic process	BP	5786	332	1.66e-05	0.004068
Dugue 2019	5606	NR	Cont	g/day in last week	GO pathway	GO:0000987	core promoter proximal region sequence-specific DNA binding	MF	343	35	1.87e-05	0.004518
Dugue 2019	5606	NR	Cont	g/day in last week	GO pathway	GO:0022626	cytosolic ribosome	CC	111	17	1.9e-05	0.004518
Dugue 2019	5606	NR	Cont	g/day in last week	GO pathway	GO:0010467	gene expression	BP	5137	299	1.93e-05	0.004518
Dugue 2019	5606	NR	Cont	g/day in last week	GO pathway	GO:0034655	nucleobase-containing compound catabolic process	BP	372	37	1.93e-05	0.004518
Dugue 2019	5606	NR	Cont	g/day in last week	GO pathway	GO:0008283	cell proliferation	BP	1904	129	1.96e-05	0.004531
Dugue 2019	5606	NR	Cont	g/day in last week	GO pathway	GO:0006402	mRNA catabolic process	BP	221	26	1.97e-05	0.004531
Dugue 2019	5606	NR	Cont	g/day in last week	GO pathway	GO:0098609	cell-cell adhesion	BP	772	63	2.03e-05	0.004606
Dugue 2019	5606	NR	Cont	g/day in last week	GO pathway	GO:0000978	RNA polymerase II core promoter proximal region sequence-specific DNA binding	MF	331	34	2.14e-05	0.004799
Dugue 2019	5606	NR	Cont	g/day in last week	GO pathway	GO:0045047	protein targeting to ER	BP	101	16	2.16e-05	0.004799
Dugue 2019	5606	NR	Cont	g/day in last week	GO pathway	GO:0000981	RNA polymerase II transcription factor activity, sequence-specific DNA binding	MF	678	57	2.18e-05	0.004809
Dugue 2019	5606	NR	Cont	g/day in last week	GO pathway	GO:0001159	core promoter proximal region DNA binding	MF	346	35	2.25e-05	0.004915
Dugue 2019	5606	NR	Cont	g/day in last week	GO pathway	GO:1902679	negative regulation of RNA biosynthetic process	BP	1157	86	2.31e-05	0.004976
Dugue 2019	5606	NR	Cont	g/day in last week	GO pathway	GO:0048584	positive regulation of response to stimulus	BP	1965	132	2.33e-05	0.004976
Dugue 2019	5606	NR	Cont	g/day in last week	GO pathway	GO:0000977	RNA polymerase II regulatory region sequence-specific DNA binding	MF	540	48	2.42e-05	0.005121
Dugue 2019	5606	NR	Cont	g/day in last week	GO pathway	GO:0000975	regulatory region DNA binding	MF	777	63	2.47e-05	0.005173
Dugue 2019	5606	NR	Cont	g/day in last week	GO pathway	GO:0001012	RNA polymerase II regulatory region DNA binding	MF	541	48	2.54e-05	0.005267
Dugue 2019	5606	NR	Cont	g/day in last week	GO pathway	GO:0042612	MHC class I protein complex	CC	9	5	2.59e-05	0.005326
Dugue 2019	5606	NR	Cont	g/day in last week	GO pathway	GO:0035556	intracellular signal transduction	BP	2544	163	3.02e-05	0.006163
Dugue 2019	5606	NR	Cont	g/day in last week	GO pathway	GO:0009893	positive regulation of metabolic process	BP	3069	191	3.06e-05	0.006179
Dugue 2019	5606	NR	Cont	g/day in last week	GO pathway	GO:0016032	viral process	BP	932	72	3.25e-05	0.006501
Dugue 2019	5606	NR	Cont	g/day in last week	GO pathway	GO:0002520	immune system development	BP	786	63	3.48e-05	0.006903
Dugue 2019	5606	NR	Cont	g/day in last week	GO pathway	GO:0072599	establishment of protein localization to endoplasmic reticulum	BP	105	16	3.53e-05	0.006903
Dugue 2019	5606	NR	Cont	g/day in last week	GO pathway	GO:0005622	intracellular	CC	13844	706	3.54e-05	0.006903
Dugue 2019	5606	NR	Cont	g/day in last week	GO pathway	GO:0003677	DNA binding	MF	2404	155	3.6e-05	0.00694
Dugue 2019	5606	NR	Cont	g/day in last week	GO pathway	GO:0009653	anatomical structure morphogenesis	BP	2368	153	3.67e-05	0.007017
Dugue 2019	5606	NR	Cont	g/day in last week	GO pathway	GO:0046649	lymphocyte activation	BP	596	51	3.73e-05	0.007075
Dugue 2019	5606	NR	Cont	g/day in last week	GO pathway	GO:0017148	negative regulation of translation	BP	153	20	3.94e-05	0.007394
Dugue 2019	5606	NR	Cont	g/day in last week	GO pathway	GO:0044764	multi-organism cellular process	BP	938	72	4e-05	0.007394
Dugue 2019	5606	NR	Cont	g/day in last week	GO pathway	GO:0023051	regulation of signaling	BP	3045	189	4e-05	0.007394
Dugue 2019	5606	NR	Cont	g/day in last week	GO pathway	GO:0044403	symbiosis, encompassing mutualism through parasitism	BP	972	74	4.08e-05	0.007475
Dugue 2019	5606	NR	Cont	g/day in last week	GO pathway	GO:0044212	transcription regulatory region DNA binding	MF	775	62	4.25e-05	0.007705
Dugue 2019	5606	NR	Cont	g/day in last week	GO pathway	GO:0043229	intracellular organelle	CC	11852	617	4.33e-05	0.007705
Dugue 2019	5606	NR	Cont	g/day in last week	GO pathway	GO:0044419	interspecies interaction between organisms	BP	974	74	4.36e-05	0.007705
Dugue 2019	5606	NR	Cont	g/day in last week	GO pathway	GO:0022610	biological adhesion	BP	1333	95	4.37e-05	0.007705
Dugue 2019	5606	NR	Cont	g/day in last week	GO pathway	GO:0010646	regulation of cell communication	BP	2993	186	4.38e-05	0.007705
Dugue 2019	5606	NR	Cont	g/day in last week	GO pathway	GO:0044424	intracellular part	CC	13560	693	4.46e-05	0.007776
Dugue 2019	5606	NR	Cont	g/day in last week	GO pathway	GO:0019901	protein kinase binding	MF	538	47	4.52e-05	0.007818
Dugue 2019	5606	NR	Cont	g/day in last week	GO pathway	GO:0046700	heterocycle catabolic process	BP	417	39	4.63e-05	0.007927
Dugue 2019	5606	NR	Cont	g/day in last week	GO pathway	GO:0019439	aromatic compound catabolic process	BP	432	40	4.65e-05	0.007927
Dugue 2019	5606	NR	Cont	g/day in last week	GO pathway	GO:0010604	positive regulation of macromolecule metabolic process	BP	2846	178	4.72e-05	0.007976
Dugue 2019	5606	NR	Cont	g/day in last week	GO pathway	GO:1901361	organic cyclic compound catabolic process	BP	464	42	5.11e-05	0.008575
Dugue 2019	5606	NR	Cont	g/day in last week	GO pathway	GO:0044270	cellular nitrogen compound catabolic process	BP	420	39	5.42e-05	0.009024
Dugue 2019	5606	NR	Cont	g/day in last week	GO pathway	GO:0046872	metal ion binding	MF	3987	237	5.86e-05	0.009618
Dugue 2019	5606	NR	Cont	g/day in last week	GO pathway	GO:0007155	cell adhesion	BP	1326	94	5.86e-05	0.009618
Dugue 2019	5606	NR	Cont	g/day in last week	GO pathway	GO:0032991	macromolecular complex	CC	4678	272	6.43e-05	0.010461
Dugue 2019	5606	NR	Cont	g/day in last week	GO pathway	GO:0009967	positive regulation of signal transduction	BP	1419	99	6.81e-05	0.010975
Dugue 2019	5606	NR	Cont	g/day in last week	GO pathway	GO:0051169	nuclear transport	BP	470	42	6.84e-05	0.010975
Dugue 2019	5606	NR	Cont	g/day in last week	GO pathway	GO:0006357	regulation of transcription from RNA polymerase II promoter	BP	1851	123	7.42e-05	0.011817
Dugue 2019	5606	NR	Cont	g/day in last week	GO pathway	GO:0005158	insulin receptor binding	MF	31	8	7.55e-05	0.011915
Dugue 2019	5606	NR	Cont	g/day in last week	GO pathway	GO:0031974	membrane-enclosed lumen	CC	4828	279	7.71e-05	0.011915
Dugue 2019	5606	NR	Cont	g/day in last week	GO pathway	GO:0043233	organelle lumen	CC	4828	279	7.71e-05	0.011915
Dugue 2019	5606	NR	Cont	g/day in last week	GO pathway	GO:0070013	intracellular organelle lumen	CC	4828	279	7.71e-05	0.011915
Dugue 2019	5606	NR	Cont	g/day in last week	GO pathway	GO:0065007	biological regulation	BP	11170	584	7.76e-05	0.011915
Dugue 2019	5606	NR	Cont	g/day in last week	GO pathway	GO:0072657	protein localization to membrane	BP	504	44	7.97e-05	0.012139
Dugue 2019	5606	NR	Cont	g/day in last week	GO pathway	GO:0090150	establishment of protein localization to membrane	BP	368	35	8.01e-05	0.012139
Dugue 2019	5606	NR	Cont	g/day in last week	GO pathway	GO:0035591	signaling adaptor activity	MF	79	13	8.38e-05	0.012551
Dugue 2019	5606	NR	Cont	g/day in last week	GO pathway	GO:0046907	intracellular transport	BP	1676	113	8.4e-05	0.012551
Dugue 2019	5606	NR	Cont	g/day in last week	GO pathway	GO:0007166	cell surface receptor signaling pathway	BP	2576	162	8.56e-05	0.012701
Dugue 2019	5606	NR	Cont	g/day in last week	GO pathway	GO:0023056	positive regulation of signaling	BP	1555	106	9.31e-05	0.013719
Dugue 2019	5606	NR	Cont	g/day in last week	GO pathway	GO:0043169	cation binding	MF	4075	240	9.57e-05	0.014009
Dugue 2019	5606	NR	Cont	g/day in last week	GO pathway	GO:0006913	nucleocytoplasmic transport	BP	462	41	9.69e-05	0.014092
Dugue 2019	5606	NR	Cont	g/day in last week	GO pathway	GO:0080090	regulation of primary metabolic process	BP	5643	319	9.94e-05	0.014353
Dugue 2019	5606	NR	Cont	g/day in last week	GO pathway	GO:0044763	single-organism cellular process	BP	10388	547	0.0001	0.014386
Dugue 2019	5606	NR	Cont	g/day in last week	GO pathway	GO:0051641	cellular localization	BP	2511	158	0.000104	0.014793
Dugue 2019	5606	NR	Cont	g/day in last week	GO pathway	GO:0045184	establishment of protein localization	BP	2085	135	0.000104	0.014793
Dugue 2019	5606	NR	Cont	g/day in last week	GO pathway	GO:0022625	cytosolic large ribosomal subunit	CC	60	11	0.000107	0.015074
Dugue 2019	5606	NR	Cont	g/day in last week	GO pathway	GO:0043226	organelle	CC	12810	657	0.000115	0.016057
Dugue 2019	5606	NR	Cont	g/day in last week	GO pathway	GO:0030097	hemopoiesis	BP	705	56	0.00012	0.016691
Dugue 2019	5606	NR	Cont	g/day in last week	GO pathway	GO:0019899	enzyme binding	MF	1801	119	0.000125	0.017244
Dugue 2019	5606	NR	Cont	g/day in last week	GO pathway	GO:0043484	regulation of RNA splicing	BP	105	15	0.000131	0.017907
Dugue 2019	5606	NR	Cont	g/day in last week	GO pathway	GO:0007254	JNK cascade	BP	193	22	0.000134	0.018269
Dugue 2019	5606	NR	Cont	g/day in last week	GO pathway	GO:0044459	plasma membrane part	CC	2509	157	0.000144	0.019561
Dugue 2019	5606	NR	Cont	g/day in last week	GO pathway	GO:0051716	cellular response to stimulus	BP	6666	368	0.00015	0.020239
Dugue 2019	5606	NR	Cont	g/day in last week	GO pathway	GO:1990247	N6-methyladenosine-containing RNA binding	MF	7	4	0.000159	0.02112
Dugue 2019	5606	NR	Cont	g/day in last week	GO pathway	GO:0003735	structural constituent of ribosome	MF	156	19	0.000159	0.02112
Dugue 2019	5606	NR	Cont	g/day in last week	GO pathway	GO:0044877	macromolecular complex binding	MF	896	67	0.00016	0.021153
Dugue 2019	5606	NR	Cont	g/day in last week	GO pathway	GO:0051171	regulation of nitrogen compound metabolic process	BP	4286	249	0.000166	0.021791
Dugue 2019	5606	NR	Cont	g/day in last week	GO pathway	GO:0072594	establishment of protein localization to organelle	BP	649	52	0.000169	0.022062
Dugue 2019	5606	NR	Cont	g/day in last week	GO pathway	GO:0042326	negative regulation of phosphorylation	BP	428	38	0.000171	0.022182
Dugue 2019	5606	NR	Cont	g/day in last week	GO pathway	GO:0002682	regulation of immune system process	BP	1297	90	0.000179	0.023102
Dugue 2019	5606	NR	Cont	g/day in last week	GO pathway	GO:0010647	positive regulation of cell communication	BP	1547	104	0.000184	0.023633
Dugue 2019	5606	NR	Cont	g/day in last week	GO pathway	GO:0030168	platelet activation	BP	158	19	0.000188	0.02396
Dugue 2019	5606	NR	Cont	g/day in last week	GO pathway	GO:0080134	regulation of response to stress	BP	1284	89	0.000202	0.025624
Dugue 2019	5606	NR	Cont	g/day in last week	GO pathway	GO:0044260	cellular macromolecule metabolic process	BP	8115	437	0.000207	0.026052
Dugue 2019	5606	NR	Cont	g/day in last week	GO pathway	GO:0034613	cellular protein localization	BP	1717	113	0.00022	0.02757
Dugue 2019	5606	NR	Cont	g/day in last week	GO pathway	GO:0006886	intracellular protein transport	BP	1130	80	0.000223	0.027742
Dugue 2019	5606	NR	Cont	g/day in last week	GO pathway	GO:0010628	positive regulation of gene expression	BP	1701	112	0.000231	0.028487
Dugue 2019	5606	NR	Cont	g/day in last week	GO pathway	GO:0031098	stress-activated protein kinase signaling cascade	BP	256	26	0.000231	0.028487
Dugue 2019	5606	NR	Cont	g/day in last week	GO pathway	GO:0007165	signal transduction	BP	5505	309	0.000242	0.029617
Dugue 2019	5606	NR	Cont	g/day in last week	GO pathway	GO:0048025	negative regulation of mRNA splicing, via spliceosome	BP	20	6	0.000249	0.030316
Dugue 2019	5606	NR	Cont	g/day in last week	GO pathway	GO:0031325	positive regulation of cellular metabolic process	BP	2860	174	0.000252	0.030497
Dugue 2019	5606	NR	Cont	g/day in last week	GO pathway	GO:0002521	leukocyte differentiation	BP	452	39	0.000253	0.030544
Dugue 2019	5606	NR	Cont	g/day in last week	GO pathway	GO:0070727	cellular macromolecule localization	BP	1727	113	0.000275	0.032968
Dugue 2019	5606	NR	Cont	g/day in last week	GO pathway	GO:0032269	negative regulation of cellular protein metabolic process	BP	1001	72	0.000292	0.034783
Dugue 2019	5606	NR	Cont	g/day in last week	GO pathway	GO:0030098	lymphocyte differentiation	BP	304	29	0.000303	0.035632
Dugue 2019	5606	NR	Cont	g/day in last week	GO pathway	GO:0071840	cellular component organization or biogenesis	BP	6088	337	0.000305	0.035632
Dugue 2019	5606	NR	Cont	g/day in last week	GO pathway	GO:0044464	cell part	CC	15742	781	0.000306	0.035632
Dugue 2019	5606	NR	Cont	g/day in last week	GO pathway	GO:0044446	intracellular organelle part	CC	8502	454	0.000307	0.035632
Dugue 2019	5606	NR	Cont	g/day in last week	GO pathway	GO:0016301	kinase activity	MF	832	62	0.000307	0.035632
Dugue 2019	5606	NR	Cont	g/day in last week	GO pathway	GO:0005623	cell	CC	15767	782	0.00031	0.03581
Dugue 2019	5606	NR	Cont	g/day in last week	GO pathway	GO:0005912	adherens junction	CC	489	41	0.000323	0.037139
Dugue 2019	5606	NR	Cont	g/day in last week	GO pathway	GO:0016070	RNA metabolic process	BP	4509	258	0.000327	0.037308
Dugue 2019	5606	NR	Cont	g/day in last week	GO pathway	GO:0016477	cell migration	BP	1215	84	0.000333	0.037787
Dugue 2019	5606	NR	Cont	g/day in last week	GO pathway	GO:0006928	movement of cell or subcellular component	BP	1809	117	0.000334	0.037787
Dugue 2019	5606	NR	Cont	g/day in last week	GO pathway	GO:0050794	regulation of cellular process	BP	9970	523	0.00034	0.038192
Dugue 2019	5606	NR	Cont	g/day in last week	GO pathway	GO:0044267	cellular protein metabolic process	BP	4770	271	0.000341	0.038192
Dugue 2019	5606	NR	Cont	g/day in last week	GO pathway	GO:0001227	transcriptional repressor activity, RNA polymerase II transcription regulatory region sequence-specific binding	MF	179	20	0.000347	0.03854
Dugue 2019	5606	NR	Cont	g/day in last week	GO pathway	GO:0070972	protein localization to endoplasmic reticulum	BP	127	16	0.000348	0.03854
Dugue 2019	5606	NR	Cont	g/day in last week	GO pathway	GO:0005654	nucleoplasm	CC	3244	193	0.000354	0.039007
Dugue 2019	5606	NR	Cont	g/day in last week	GO pathway	GO:0000139	Golgi membrane	CC	687	53	0.00037	0.040515
Dugue 2019	5606	NR	Cont	g/day in last week	GO pathway	GO:0045595	regulation of cell differentiation	BP	1488	99	0.000382	0.041516
Dugue 2019	5606	NR	Cont	g/day in last week	GO pathway	GO:0051403	stress-activated MAPK cascade	BP	250	25	0.000383	0.041516
Dugue 2019	5606	NR	Cont	g/day in last week	GO pathway	GO:0008284	positive regulation of cell proliferation	BP	823	61	0.000394	0.042443
Dugue 2019	5606	NR	Cont	g/day in last week	GO pathway	GO:0000377	RNA splicing, via transesterification reactions with bulged adenosine as nucleophile	BP	309	29	0.000397	0.042443
Dugue 2019	5606	NR	Cont	g/day in last week	GO pathway	GO:0000398	mRNA splicing, via spliceosome	BP	309	29	0.000397	0.042443
Dugue 2019	5606	NR	Cont	g/day in last week	GO pathway	GO:0009059	macromolecule biosynthetic process	BP	5023	283	0.000413	0.043963
Dugue 2019	5606	NR	Cont	g/day in last week	GO pathway	GO:0006469	negative regulation of protein kinase activity	BP	238	24	0.000439	0.046264
Dugue 2019	5606	NR	Cont	g/day in last week	GO pathway	GO:0042451	purine nucleoside biosynthetic process	BP	22	6	0.000441	0.046264
Dugue 2019	5606	NR	Cont	g/day in last week	GO pathway	GO:0046129	purine ribonucleoside biosynthetic process	BP	22	6	0.000441	0.046264
Dugue 2019	5606	NR	Cont	g/day in last week	GO pathway	GO:0015031	protein transport	BP	1933	123	0.000444	0.046264
Dugue 2019	5606	NR	Cont	g/day in last week	GO pathway	GO:0009987	cellular process	BP	14888	744	0.000445	0.046264
Dugue 2019	5606	NR	Cont	g/day in last week	GO pathway	GO:0051649	establishment of localization in cell	BP	1989	126	0.000448	0.046342
Dugue 2019	5606	NR	Cont	g/day in last week	GO pathway	GO:0044271	cellular nitrogen compound biosynthetic process	BP	4791	271	0.000457	0.047056
Dugue 2019	5606	NR	Cont	g/day in last week	GO pathway	GO:0043170	macromolecule metabolic process	BP	8767	465	0.000463	0.047402
Dugue 2019	5606	NR	Cont	g/day in last week	GO pathway	GO:0000375	RNA splicing, via transesterification reactions	BP	312	29	0.000465	0.047402
Dugue 2019	5606	NR	Cont	g/day in last week	GO pathway	GO:0046330	positive regulation of JNK cascade	BP	118	15	0.000478	0.048356
Dugue 2019	5606	NR	Cont	g/day in last week	GO pathway	GO:0006366	transcription from RNA polymerase II promoter	BP	2048	129	0.000479	0.048356
Dugue 2019	5606	NR	Cont	g/day in last week	GO pathway	GO:0033673	negative regulation of kinase activity	BP	254	25	0.000485	0.048758
Dugue 2019	5606	NR	Cont	g/day in last week	GO pathway	GO:0003729	mRNA binding	MF	184	20	0.000496	0.049531
Dugue 2019	5606	NR	Cont	g/day in last week	GO pathway	GO:0010595	positive regulation of endothelial cell migration	BP	71	11	0.000497	0.049531
Dugue 2019	5606	NR	Cont	g/day in last week	GO pathway	GO:0016773	phosphotransferase activity, alcohol group as acceptor	MF	764	57	0.000518	0.05128
Dugue 2019	5606	NR	Cont	g/day in last week	GO pathway	GO:0048873	homeostasis of number of cells within a tissue	BP	31	7	0.00052	0.05128
Dugue 2019	5606	NR	Cont	g/day in last week	GO pathway	GO:0044033	multi-organism metabolic process	BP	213	22	0.000541	0.05312
Dugue 2019	5606	NR	Cont	g/day in last week	GO pathway	GO:0046835	carbohydrate phosphorylation	BP	23	6	0.000573	0.055825
Dugue 2019	5606	NR	Cont	g/day in last week	GO pathway	GO:0042611	MHC protein complex	CC	23	6	0.000573	0.055825
Dugue 2019	5606	NR	Cont	g/day in last week	GO pathway	GO:0045936	negative regulation of phosphate metabolic process	BP	552	44	0.000584	0.056663
Dugue 2019	5606	NR	Cont	g/day in last week	GO pathway	GO:0001933	negative regulation of protein phosphorylation	BP	393	34	0.000588	0.05671
Dugue 2019	5606	NR	Cont	g/day in last week	GO pathway	GO:0051254	positive regulation of RNA metabolic process	BP	1417	94	0.000594	0.057122
Dugue 2019	5606	NR	Cont	g/day in last week	GO pathway	GO:1901576	organic substance biosynthetic process	BP	6100	335	0.000599	0.057309
Dugue 2019	5606	NR	Cont	g/day in last week	GO pathway	GO:0010563	negative regulation of phosphorus metabolic process	BP	553	44	0.000607	0.057683
Dugue 2019	5606	NR	Cont	g/day in last week	GO pathway	GO:0035326	enhancer binding	MF	96	13	0.00061	0.057683
Dugue 2019	5606	NR	Cont	g/day in last week	GO pathway	GO:0019080	viral gene expression	BP	187	20	0.000611	0.057683
Dugue 2019	5606	NR	Cont	g/day in last week	GO pathway	GO:0044422	organelle part	CC	8707	461	0.000615	0.057686
Dugue 2019	5606	NR	Cont	g/day in last week	GO pathway	GO:0005730	nucleolus	CC	889	64	0.000616	0.057686
Dugue 2019	5606	NR	Cont	g/day in last week	GO pathway	GO:0003727	single-stranded RNA binding	MF	73	11	0.000634	0.059098
Dugue 2019	5606	NR	Cont	g/day in last week	GO pathway	GO:0051248	negative regulation of protein metabolic process	BP	1064	74	0.000638	0.059181
Dugue 2019	5606	NR	Cont	g/day in last week	GO pathway	GO:0070161	anchoring junction	CC	507	41	0.00067	0.061899
Dugue 2019	5606	NR	Cont	g/day in last week	GO pathway	GO:0048869	cellular developmental process	BP	3909	225	0.000676	0.062243
Dugue 2019	5606	NR	Cont	g/day in last week	GO pathway	GO:0050793	regulation of developmental process	BP	2216	137	0.000681	0.062417
Dugue 2019	5606	NR	Cont	g/day in last week	GO pathway	GO:0048513	animal organ development	BP	3191	188	0.000709	0.064545
Dugue 2019	5606	NR	Cont	g/day in last week	GO pathway	GO:0040011	locomotion	BP	1570	102	0.00071	0.064545
Dugue 2019	5606	NR	Cont	g/day in last week	GO pathway	GO:1901564	organonitrogen compound metabolic process	BP	2220	137	0.000733	0.066262
Dugue 2019	5606	NR	Cont	g/day in last week	GO pathway	GO:0000982	transcription factor activity, RNA polymerase II core promoter proximal region sequence-specific binding	MF	367	32	0.000737	0.066262
Dugue 2019	5606	NR	Cont	g/day in last week	GO pathway	GO:0019083	viral transcription	BP	176	19	0.000738	0.066262
Dugue 2019	5606	NR	Cont	g/day in last week	GO pathway	GO:0042162	telomeric DNA binding	MF	33	7	0.000777	0.069454
Dugue 2019	5606	NR	Cont	g/day in last week	GO pathway	GO:0033554	cellular response to stress	BP	1796	114	0.0008	0.071253
Dugue 2019	5606	NR	Cont	g/day in last week	GO pathway	GO:0051173	positive regulation of nitrogen compound metabolic process	BP	1778	113	0.000808	0.071628
Dugue 2019	5606	NR	Cont	g/day in last week	GO pathway	GO:0050732	negative regulation of peptidyl-tyrosine phosphorylation	BP	43	8	0.000837	0.073649
Dugue 2019	5606	NR	Cont	g/day in last week	GO pathway	GO:0008104	protein localization	BP	2530	153	0.000837	0.073649
Dugue 2019	5606	NR	Cont	g/day in last week	GO pathway	GO:0015833	peptide transport	BP	1967	123	0.000866	0.075675
Dugue 2019	5606	NR	Cont	g/day in last week	GO pathway	GO:0045935	positive regulation of nucleobase-containing compound metabolic process	BP	1671	107	0.000867	0.075675
Dugue 2019	5606	NR	Cont	g/day in last week	GO pathway	GO:0007173	epidermal growth factor receptor signaling pathway	BP	125	15	0.000881	0.076305
Dugue 2019	5606	NR	Cont	g/day in last week	GO pathway	GO:0034645	cellular macromolecule biosynthetic process	BP	4860	272	0.000881	0.076305
Dugue 2019	5606	NR	Cont	g/day in last week	GO pathway	GO:0033365	protein localization to organelle	BP	902	64	0.000893	0.076837
Dugue 2019	5606	NR	Cont	g/day in last week	GO pathway	GO:0044238	primary metabolic process	BP	9967	519	0.000895	0.076837
Dugue 2019	5606	NR	Cont	g/day in last week	GO pathway	GO:0042127	regulation of cell proliferation	BP	1508	98	0.000898	0.076837
Dugue 2019	5606	NR	Cont	g/day in last week	GO pathway	GO:0003674	molecular_function	MF	16365	804	0.000915	0.077935
Dugue 2019	5606	NR	Cont	g/day in last week	GO pathway	GO:0033119	negative regulation of RNA splicing	BP	25	6	0.000927	0.078346
Dugue 2019	5606	NR	Cont	g/day in last week	GO pathway	GO:0072359	circulatory system development	BP	921	65	0.000934	0.078346
Dugue 2019	5606	NR	Cont	g/day in last week	GO pathway	GO:0009058	biosynthetic process	BP	6177	337	0.000934	0.078346
Dugue 2019	5606	NR	Cont	g/day in last week	GO pathway	GO:0016441	posttranscriptional gene silencing	BP	65	10	0.000937	0.078346
Dugue 2019	5606	NR	Cont	g/day in last week	GO pathway	GO:0000980	RNA polymerase II distal enhancer sequence-specific DNA binding	MF	65	10	0.000937	0.078346
Dugue 2019	5606	NR	Cont	g/day in last week	GO pathway	GO:0008134	transcription factor binding	MF	516	41	0.000943	0.078552
Dugue 2019	5606	NR	Cont	g/day in last week	GO pathway	GO:0044391	ribosomal subunit	CC	180	19	0.000969	0.080408
Dugue 2019	5606	NR	Cont	g/day in last week	GO pathway	GO:0010557	positive regulation of macromolecule biosynthetic process	BP	1604	103	0.00099	0.081833
Dugue 2019	5606	NR	Cont	g/day in last week	GO pathway	GO:0070934	CRD-mediated mRNA stabilization	BP	5	3	0.000999	0.081907
Dugue 2019	5606	NR	Cont	g/day in last week	GO pathway	GO:0034154	toll-like receptor 7 signaling pathway	BP	5	3	0.000999	0.081907
Dugue 2019	5606	NR	Cont	g/day in last week	GO pathway	GO:0080135	regulation of cellular response to stress	BP	600	46	0.001006	0.082179
Dugue 2019	5606	NR	Cont	g/day in last week	GO pathway	GO:0033036	macromolecule localization	BP	2830	168	0.001042	0.0848
Dugue 2019	5606	NR	Cont	g/day in last week	GO pathway	GO:0071702	organic substance transport	BP	2639	158	0.001052	0.085332
Dugue 2019	5606	NR	Cont	g/day in last week	GO pathway	GO:0098588	bounding membrane of organelle	CC	1903	119	0.001057	0.08541
Dugue 2019	5606	NR	Cont	g/day in last week	GO pathway	GO:0010556	regulation of macromolecule biosynthetic process	BP	4001	228	0.001075	0.08637
Dugue 2019	5606	NR	Cont	g/day in last week	GO pathway	GO:0031328	positive regulation of cellular biosynthetic process	BP	1737	110	0.001077	0.08637
Dugue 2019	5606	NR	Cont	g/day in last week	GO pathway	GO:0030099	myeloid cell differentiation	BP	330	29	0.001134	0.090578
Dugue 2019	5606	NR	Cont	g/day in last week	GO pathway	GO:0006338	chromatin remodeling	BP	155	17	0.001152	0.091715
Dugue 2019	5606	NR	Cont	g/day in last week	GO pathway	GO:0045321	leukocyte activation	BP	1123	76	0.001163	0.09228
Dugue 2019	5606	NR	Cont	g/day in last week	GO pathway	GO:0000932	P-body	CC	103	13	0.001192	0.093889
Dugue 2019	5606	NR	Cont	g/day in last week	GO pathway	GO:0008593	regulation of Notch signaling pathway	BP	67	10	0.001192	0.093889
Dugue 2019	5606	NR	Cont	g/day in last week	GO pathway	GO:0035639	purine ribonucleoside triphosphate binding	MF	1780	112	0.001211	0.095013
Dugue 2019	5606	NR	Cont	g/day in last week	GO pathway	GO:0019058	viral life cycle	BP	442	36	0.001227	0.095585
Dugue 2019	5606	NR	Cont	g/day in last week	GO pathway	GO:0007267	cell-cell signaling	BP	1541	99	0.001227	0.095585
Dugue 2019	5606	NR	Cont	g/day in last week	GO pathway	GO:0031326	regulation of cellular biosynthetic process	BP	4189	237	0.001233	0.095711
Dugue 2019	5606	NR	Cont	g/day in last week	GO pathway	GO:0042886	amide transport	BP	1988	123	0.001282	0.099132
Dugue 2019	5606	NR	Cont	g/day in last week	GO pathway	GO:0009891	positive regulation of biosynthetic process	BP	1765	111	0.001297	0.099969
Dugue 2019	5606	NR	Cont	g/day in last week	GO pathway	GO:0048870	cell motility	BP	1344	88	0.001321	0.100831
Dugue 2019	5606	NR	Cont	g/day in last week	GO pathway	GO:0051674	localization of cell	BP	1344	88	0.001321	0.100831
Dugue 2019	5606	NR	Cont	g/day in last week	GO pathway	GO:0005844	polysome	CC	46	8	0.001328	0.100831
Dugue 2019	5606	NR	Cont	g/day in last week	GO pathway	GO:0001078	transcriptional repressor activity, RNA polymerase II core promoter proximal region sequence-specific binding	MF	117	14	0.001329	0.100831
Dugue 2019	5606	NR	Cont	g/day in last week	GO pathway	GO:0032559	adenyl ribonucleotide binding	MF	1490	96	0.001331	0.100831
Dugue 2019	5606	NR	Cont	g/day in last week	GO pathway	GO:0046128	purine ribonucleoside metabolic process	BP	68	10	0.001339	0.100928
Dugue 2019	5606	NR	Cont	g/day in last week	GO pathway	GO:0006612	protein targeting to membrane	BP	185	19	0.001344	0.100928
Dugue 2019	5606	NR	Cont	g/day in last week	GO pathway	GO:0005524	ATP binding	MF	1454	94	0.001346	0.100928
Dugue 2019	5606	NR	Cont	g/day in last week	GO pathway	GO:0032555	purine ribonucleotide binding	MF	1823	114	0.001355	0.101209
Dugue 2019	5606	NR	Cont	g/day in last week	GO pathway	GO:0072358	cardiovascular system development	BP	609	46	0.001361	0.101364
Dugue 2019	5606	NR	Cont	g/day in last week	GO pathway	GO:0005070	SH3/SH2 adaptor activity	MF	57	9	0.001381	0.102456
Dugue 2019	5606	NR	Cont	g/day in last week	GO pathway	GO:0030029	actin filament-based process	BP	660	49	0.001387	0.102456
Dugue 2019	5606	NR	Cont	g/day in last week	GO pathway	GO:0006605	protein targeting	BP	677	50	0.00139	0.102456
Dugue 2019	5606	NR	Cont	g/day in last week	GO pathway	GO:0016043	cellular component organization	BP	5886	321	0.001409	0.103365
Dugue 2019	5606	NR	Cont	g/day in last week	GO pathway	GO:0010631	epithelial cell migration	BP	229	22	0.001412	0.103365
Dugue 2019	5606	NR	Cont	g/day in last week	GO pathway	GO:0016772	transferase activity, transferring phosphorus-containing groups	MF	973	67	0.001469	0.107163
Dugue 2019	5606	NR	Cont	g/day in last week	GO pathway	GO:0019538	protein metabolic process	BP	5344	294	0.001492	0.108236
Dugue 2019	5606	NR	Cont	g/day in last week	GO pathway	GO:0044249	cellular biosynthetic process	BP	6013	327	0.001493	0.108236
Dugue 2019	5606	NR	Cont	g/day in last week	GO pathway	GO:0048024	regulation of mRNA splicing, via spliceosome	BP	69	10	0.001501	0.108414
Dugue 2019	5606	NR	Cont	g/day in last week	GO pathway	GO:0090304	nucleic acid metabolic process	BP	5005	277	0.001552	0.111753
Dugue 2019	5606	NR	Cont	g/day in last week	GO pathway	GO:2000112	regulation of cellular macromolecule biosynthetic process	BP	3891	221	0.001574	0.112531
Dugue 2019	5606	NR	Cont	g/day in last week	GO pathway	GO:0051179	localization	BP	5977	325	0.001577	0.112531
Dugue 2019	5606	NR	Cont	g/day in last week	GO pathway	GO:0090132	epithelium migration	BP	231	22	0.001579	0.112531
Dugue 2019	5606	NR	Cont	g/day in last week	GO pathway	GO:0060307	regulation of ventricular cardiac muscle cell membrane repolarization	BP	19	5	0.001604	0.113598
Dugue 2019	5606	NR	Cont	g/day in last week	GO pathway	GO:0001891	phagocytic cup	CC	19	5	0.001604	0.113598
Dugue 2019	5606	NR	Cont	g/day in last week	GO pathway	GO:0031252	cell leading edge	CC	354	30	0.001659	0.117138
Dugue 2019	5606	NR	Cont	g/day in last week	GO pathway	GO:0030554	adenyl nucleotide binding	MF	1501	96	0.001672	0.117631
Dugue 2019	5606	NR	Cont	g/day in last week	GO pathway	GO:0030154	cell differentiation	BP	3739	213	0.001698	0.119094
Dugue 2019	5606	NR	Cont	g/day in last week	GO pathway	GO:0044444	cytoplasmic part	CC	8946	468	0.001715	0.119931
Dugue 2019	5606	NR	Cont	g/day in last week	GO pathway	GO:0017076	purine nucleotide binding	MF	1836	114	0.001729	0.120466
Dugue 2019	5606	NR	Cont	g/day in last week	GO pathway	GO:0018146	keratan sulfate biosynthetic process	BP	28	6	0.001746	0.120956
Dugue 2019	5606	NR	Cont	g/day in last week	GO pathway	GO:0050679	positive regulation of epithelial cell proliferation	BP	161	17	0.001747	0.120956
Dugue 2019	5606	NR	Cont	g/day in last week	GO pathway	GO:0043405	regulation of MAP kinase activity	BP	324	28	0.001753	0.120999
Dugue 2019	5606	NR	Cont	g/day in last week	GO pathway	GO:0009889	regulation of biosynthetic process	BP	4236	238	0.00176	0.121107
Dugue 2019	5606	NR	Cont	g/day in last week	GO pathway	GO:0016458	gene silencing	BP	248	23	0.001774	0.121705
Dugue 2019	5606	NR	Cont	g/day in last week	GO pathway	GO:0006397	mRNA processing	BP	468	37	0.001786	0.122163
Dugue 2019	5606	NR	Cont	g/day in last week	GO pathway	GO:0098847	sequence-specific single stranded DNA binding	MF	12	4	0.001854	0.125615
Dugue 2019	5606	NR	Cont	g/day in last week	GO pathway	GO:0019219	regulation of nucleobase-containing compound metabolic process	BP	4022	227	0.001856	0.125615
Dugue 2019	5606	NR	Cont	g/day in last week	GO pathway	GO:0032553	ribonucleotide binding	MF	1840	114	0.001861	0.125615
Dugue 2019	5606	NR	Cont	g/day in last week	GO pathway	GO:0005681	spliceosomal complex	CC	176	18	0.001861	0.125615
Dugue 2019	5606	NR	Cont	g/day in last week	GO pathway	GO:0001158	enhancer sequence-specific DNA binding	MF	83	11	0.00187	0.125615
Dugue 2019	5606	NR	Cont	g/day in last week	GO pathway	GO:0042278	purine nucleoside metabolic process	BP	71	10	0.001871	0.125615
Dugue 2019	5606	NR	Cont	g/day in last week	GO pathway	GO:0051239	regulation of multicellular organismal process	BP	2619	155	0.001914	0.128036
Dugue 2019	5606	NR	Cont	g/day in last week	GO pathway	GO:0070937	CRD-mediated mRNA stability complex	CC	6	3	0.001927	0.128036
Dugue 2019	5606	NR	Cont	g/day in last week	GO pathway	GO:0000155	phosphorelay sensor kinase activity	MF	6	3	0.001927	0.128036
Dugue 2019	5606	NR	Cont	g/day in last week	GO pathway	GO:0032403	protein complex binding	MF	722	52	0.001931	0.128036
Dugue 2019	5606	NR	Cont	g/day in last week	GO pathway	GO:0034641	cellular nitrogen compound metabolic process	BP	6261	338	0.001956	0.129305
Dugue 2019	5606	NR	Cont	g/day in last week	GO pathway	GO:0030175	filopodium	CC	96	12	0.001973	0.130037
Dugue 2019	5606	NR	Cont	g/day in last week	GO pathway	GO:0043487	regulation of RNA stability	BP	149	16	0.001979	0.130051
Dugue 2019	5606	NR	Cont	g/day in last week	GO pathway	GO:0031400	negative regulation of protein modification process	BP	587	44	0.001986	0.130088
Dugue 2019	5606	NR	Cont	g/day in last week	GO pathway	GO:0046328	regulation of JNK cascade	BP	163	17	0.001995	0.130287
Dugue 2019	5606	NR	Cont	g/day in last week	GO pathway	GO:0043228	non-membrane-bounded organelle	CC	3870	219	0.002012	0.130612
Dugue 2019	5606	NR	Cont	g/day in last week	GO pathway	GO:0043232	intracellular non-membrane-bounded organelle	CC	3870	219	0.002012	0.130612
Dugue 2019	5606	NR	Cont	g/day in last week	GO pathway	GO:0031491	nucleosome binding	MF	49	8	0.002024	0.131029
Dugue 2019	5606	NR	Cont	g/day in last week	GO pathway	GO:0032268	regulation of cellular protein metabolic process	BP	2317	139	0.002038	0.131509
Dugue 2019	5606	NR	Cont	g/day in last week	GO pathway	GO:0019200	carbohydrate kinase activity	MF	20	5	0.002056	0.132277
Dugue 2019	5606	NR	Cont	g/day in last week	GO pathway	GO:0045893	positive regulation of transcription, DNA-templated	BP	1347	87	0.002086	0.133471
Dugue 2019	5606	NR	Cont	g/day in last week	GO pathway	GO:1903508	positive regulation of nucleic acid-templated transcription	BP	1347	87	0.002086	0.133471
Dugue 2019	5606	NR	Cont	g/day in last week	GO pathway	GO:0050686	negative regulation of mRNA processing	BP	29	6	0.002114	0.134845
Dugue 2019	5606	NR	Cont	g/day in last week	GO pathway	GO:0046822	regulation of nucleocytoplasmic transport	BP	207	20	0.002129	0.135106
Dugue 2019	5606	NR	Cont	g/day in last week	GO pathway	GO:0034654	nucleobase-containing compound biosynthetic process	BP	4251	238	0.002131	0.135106
Dugue 2019	5606	NR	Cont	g/day in last week	GO pathway	GO:0090130	tissue migration	BP	237	22	0.002182	0.137973
Dugue 2019	5606	NR	Cont	g/day in last week	GO pathway	GO:0044237	cellular metabolic process	BP	10072	520	0.002226	0.13879
Dugue 2019	5606	NR	Cont	g/day in last week	GO pathway	GO:0000118	histone deacetylase complex	CC	61	9	0.002249	0.13879
Dugue 2019	5606	NR	Cont	g/day in last week	GO pathway	GO:0001667	ameboidal-type cell migration	BP	314	27	0.002252	0.13879
Dugue 2019	5606	NR	Cont	g/day in last week	GO pathway	GO:0046086	adenosine biosynthetic process	BP	2	2	0.002262	0.13879
Dugue 2019	5606	NR	Cont	g/day in last week	GO pathway	GO:0006196	AMP catabolic process	BP	2	2	0.002262	0.13879
Dugue 2019	5606	NR	Cont	g/day in last week	GO pathway	GO:1902359	Notch signaling pathway involved in somitogenesis	BP	2	2	0.002262	0.13879
Dugue 2019	5606	NR	Cont	g/day in last week	GO pathway	GO:1902366	regulation of Notch signaling pathway involved in somitogenesis	BP	2	2	0.002262	0.13879
Dugue 2019	5606	NR	Cont	g/day in last week	GO pathway	GO:1902367	negative regulation of Notch signaling pathway involved in somitogenesis	BP	2	2	0.002262	0.13879
Dugue 2019	5606	NR	Cont	g/day in last week	GO pathway	GO:0031905	early endosome lumen	CC	2	2	0.002262	0.13879
Dugue 2019	5606	NR	Cont	g/day in last week	GO pathway	GO:0031315	extrinsic component of mitochondrial outer membrane	CC	2	2	0.002262	0.13879
Dugue 2019	5606	NR	Cont	g/day in last week	GO pathway	GO:0006915	apoptotic process	BP	1776	110	0.002265	0.13879
Dugue 2019	5606	NR	Cont	g/day in last week	GO pathway	GO:0036092	phosphatidylinositol-3-phosphate biosynthetic process	BP	50	8	0.002311	0.141223
Dugue 2019	5606	NR	Cont	g/day in last week	GO pathway	GO:0030036	actin cytoskeleton organization	BP	575	43	0.00232	0.141373
Dugue 2019	5606	NR	Cont	g/day in last week	GO pathway	GO:0006139	nucleobase-containing compound metabolic process	BP	5625	306	0.002333	0.141761
Dugue 2019	5606	NR	Cont	g/day in last week	GO pathway	GO:0010634	positive regulation of epithelial cell migration	BP	111	13	0.002362	0.143153
Dugue 2019	5606	NR	Cont	g/day in last week	GO pathway	GO:0071705	nitrogen compound transport	BP	2270	136	0.002403	0.145196
Dugue 2019	5606	NR	Cont	g/day in last week	GO pathway	GO:0071704	organic substance metabolic process	BP	10339	532	0.002497	0.150443
Dugue 2019	5606	NR	Cont	g/day in last week	GO pathway	GO:0044699	single-organism process	BP	12900	650	0.00256	0.153199
Dugue 2019	5606	NR	Cont	g/day in last week	GO pathway	GO:0032874	positive regulation of stress-activated MAPK cascade	BP	139	15	0.002571	0.153199
Dugue 2019	5606	NR	Cont	g/day in last week	GO pathway	GO:0009650	UV protection	BP	13	4	0.002577	0.153199
Dugue 2019	5606	NR	Cont	g/day in last week	GO pathway	GO:0017119	Golgi transport complex	CC	13	4	0.002577	0.153199
Dugue 2019	5606	NR	Cont	g/day in last week	GO pathway	GO:0016775	phosphotransferase activity, nitrogenous group as acceptor	MF	13	4	0.002577	0.153199
Dugue 2019	5606	NR	Cont	g/day in last week	GO pathway	GO:0043555	regulation of translation in response to stress	BP	21	5	0.002594	0.153739
Dugue 2019	5606	NR	Cont	g/day in last week	GO pathway	GO:0009163	nucleoside biosynthetic process	BP	51	8	0.002629	0.155004
Dugue 2019	5606	NR	Cont	g/day in last week	GO pathway	GO:0000186	activation of MAPKK activity	BP	51	8	0.002629	0.155004
Dugue 2019	5606	NR	Cont	g/day in last week	GO pathway	GO:0005840	ribosome	CC	226	21	0.002685	0.157874
Dugue 2019	5606	NR	Cont	g/day in last week	GO pathway	GO:0051348	negative regulation of transferase activity	BP	350	29	0.002737	0.1605
Dugue 2019	5606	NR	Cont	g/day in last week	GO pathway	GO:0070304	positive regulation of stress-activated protein kinase signaling cascade	BP	140	15	0.002756	0.160745
Dugue 2019	5606	NR	Cont	g/day in last week	GO pathway	GO:0043488	regulation of mRNA stability	BP	140	15	0.002756	0.160745
Dugue 2019	5606	NR	Cont	g/day in last week	GO pathway	GO:0051223	regulation of protein transport	BP	735	52	0.002798	0.162731
Dugue 2019	5606	NR	Cont	g/day in last week	GO pathway	GO:0022603	regulation of anatomical structure morphogenesis	BP	928	63	0.002805	0.162731
Dugue 2019	5606	NR	Cont	g/day in last week	GO pathway	GO:0005887	integral component of plasma membrane	CC	1528	96	0.002856	0.16523
Dugue 2019	5606	NR	Cont	g/day in last week	GO pathway	GO:0043542	endothelial cell migration	BP	155	16	0.002958	0.170119
Dugue 2019	5606	NR	Cont	g/day in last week	GO pathway	GO:0050678	regulation of epithelial cell proliferation	BP	289	25	0.002968	0.170119
Dugue 2019	5606	NR	Cont	g/day in last week	GO pathway	GO:0051246	regulation of protein metabolic process	BP	2494	147	0.002975	0.170119
Dugue 2019	5606	NR	Cont	g/day in last week	GO pathway	GO:0048872	homeostasis of number of cells	BP	228	21	0.002982	0.170119
Dugue 2019	5606	NR	Cont	g/day in last week	GO pathway	GO:0043547	positive regulation of GTPase activity	BP	634	46	0.002987	0.170119
Dugue 2019	5606	NR	Cont	g/day in last week	GO pathway	GO:0042110	T cell activation	BP	433	34	0.002993	0.170119
Dugue 2019	5606	NR	Cont	g/day in last week	GO pathway	GO:0001944	vasculature development	BP	600	44	0.002995	0.170119
Dugue 2019	5606	NR	Cont	g/day in last week	GO pathway	GO:0032501	multicellular organismal process	BP	6938	369	0.00304	0.172242
Dugue 2019	5606	NR	Cont	g/day in last week	GO pathway	GO:0044262	cellular carbohydrate metabolic process	BP	244	22	0.003123	0.175991
Dugue 2019	5606	NR	Cont	g/day in last week	GO pathway	GO:0030054	cell junction	CC	1184	77	0.003127	0.175991
Dugue 2019	5606	NR	Cont	g/day in last week	GO pathway	GO:0030217	T cell differentiation	BP	214	20	0.003134	0.175991
Dugue 2019	5606	NR	Cont	g/day in last week	GO pathway	GO:0070201	regulation of establishment of protein localization	BP	809	56	0.003139	0.175991
Dugue 2019	5606	NR	Cont	g/day in last week	GO pathway	GO:0035194	posttranscriptional gene silencing by RNA	BP	64	9	0.003146	0.175991
Dugue 2019	5606	NR	Cont	g/day in last week	GO pathway	GO:0002252	immune effector process	BP	1059	70	0.003232	0.177398
Dugue 2019	5606	NR	Cont	g/day in last week	GO pathway	GO:0019904	protein domain specific binding	MF	654	47	0.003251	0.177398
Dugue 2019	5606	NR	Cont	g/day in last week	GO pathway	GO:0019530	taurine metabolic process	BP	7	3	0.003253	0.177398
Dugue 2019	5606	NR	Cont	g/day in last week	GO pathway	GO:0019694	alkanesulfonate metabolic process	BP	7	3	0.003253	0.177398
Dugue 2019	5606	NR	Cont	g/day in last week	GO pathway	GO:0060789	hair follicle placode formation	BP	7	3	0.003253	0.177398
Dugue 2019	5606	NR	Cont	g/day in last week	GO pathway	GO:0097623	potassium ion export across plasma membrane	BP	7	3	0.003253	0.177398
Dugue 2019	5606	NR	Cont	g/day in last week	GO pathway	GO:0098668	potassium ion export from cell	BP	7	3	0.003253	0.177398
Dugue 2019	5606	NR	Cont	g/day in last week	GO pathway	GO:0000160	phosphorelay signal transduction system	BP	7	3	0.003253	0.177398
Dugue 2019	5606	NR	Cont	g/day in last week	GO pathway	GO:0042518	negative regulation of tyrosine phosphorylation of Stat3 protein	BP	7	3	0.003253	0.177398
Dugue 2019	5606	NR	Cont	g/day in last week	GO pathway	GO:0004673	protein histidine kinase activity	MF	7	3	0.003253	0.177398
Dugue 2019	5606	NR	Cont	g/day in last week	GO pathway	GO:0003700	transcription factor activity, sequence-specific DNA binding	MF	1186	77	0.003264	0.177582
Dugue 2019	5606	NR	Cont	g/day in last week	GO pathway	GO:1902680	positive regulation of RNA biosynthetic process	BP	1369	87	0.003279	0.177915
Dugue 2019	5606	NR	Cont	g/day in last week	GO pathway	GO:0045335	phagocytic vesicle	CC	102	12	0.003294	0.178326
Dugue 2019	5606	NR	Cont	g/day in last week	GO pathway	GO:0098797	plasma membrane protein complex	CC	230	21	0.003306	0.178505
Dugue 2019	5606	NR	Cont	g/day in last week	GO pathway	GO:0001071	nucleic acid binding transcription factor activity	MF	1187	77	0.003335	0.17964
Dugue 2019	5606	NR	Cont	g/day in last week	GO pathway	GO:1901659	glycosyl compound biosynthetic process	BP	53	8	0.003367	0.180889
Dugue 2019	5606	NR	Cont	g/day in last week	GO pathway	GO:0097300	programmed necrotic cell death	BP	42	7	0.003384	0.18138
Dugue 2019	5606	NR	Cont	g/day in last week	GO pathway	GO:0032872	regulation of stress-activated MAPK cascade	BP	201	19	0.003462	0.184633
Dugue 2019	5606	NR	Cont	g/day in last week	GO pathway	GO:2001241	positive regulation of extrinsic apoptotic signaling pathway in absence of ligand	BP	14	4	0.003474	0.184633
Dugue 2019	5606	NR	Cont	g/day in last week	GO pathway	GO:0006684	sphingomyelin metabolic process	BP	14	4	0.003474	0.184633
Dugue 2019	5606	NR	Cont	g/day in last week	GO pathway	GO:0044445	cytosolic part	CC	231	21	0.003479	0.184633
Dugue 2019	5606	NR	Cont	g/day in last week	GO pathway	GO:0008152	metabolic process	BP	10824	553	0.003588	0.189981
Dugue 2019	5606	NR	Cont	g/day in last week	GO pathway	GO:0006955	immune response	BP	1821	111	0.003611	0.190747
Dugue 2019	5606	NR	Cont	g/day in last week	GO pathway	GO:0070302	regulation of stress-activated protein kinase signaling cascade	BP	202	19	0.003656	0.192181
Dugue 2019	5606	NR	Cont	g/day in last week	GO pathway	GO:0018130	heterocycle biosynthetic process	BP	4315	239	0.003656	0.192181
Dugue 2019	5606	NR	Cont	g/day in last week	GO pathway	GO:0006807	nitrogen compound metabolic process	BP	6709	357	0.003673	0.192595
Dugue 2019	5606	NR	Cont	g/day in last week	GO pathway	GO:0006325	chromatin organization	BP	728	51	0.003721	0.19433
Dugue 2019	5606	NR	Cont	g/day in last week	GO pathway	GO:0048585	negative regulation of response to stimulus	BP	1357	86	0.003724	0.19433
Dugue 2019	5606	NR	Cont	g/day in last week	GO pathway	GO:0050673	epithelial cell proliferation	BP	342	28	0.00379	0.196895
Dugue 2019	5606	NR	Cont	g/day in last week	GO pathway	GO:0030173	integral component of Golgi membrane	CC	54	8	0.003791	0.196895
Dugue 2019	5606	NR	Cont	g/day in last week	GO pathway	GO:1903845	negative regulation of cellular response to transforming growth factor beta stimulus	BP	66	9	0.003887	0.201414
Dugue 2019	5606	NR	Cont	g/day in last week	GO pathway	GO:0043168	anion binding	MF	2629	153	0.003962	0.202963
Dugue 2019	5606	NR	Cont	g/day in last week	GO pathway	GO:0001783	B cell apoptotic process	BP	23	5	0.003964	0.202963
Dugue 2019	5606	NR	Cont	g/day in last week	GO pathway	GO:0099623	regulation of cardiac muscle cell membrane repolarization	BP	23	5	0.003964	0.202963
Dugue 2019	5606	NR	Cont	g/day in last week	GO pathway	GO:0099625	ventricular cardiac muscle cell membrane repolarization	BP	23	5	0.003964	0.202963
Dugue 2019	5606	NR	Cont	g/day in last week	GO pathway	GO:0042605	peptide antigen binding	MF	23	5	0.003964	0.202963
Dugue 2019	5606	NR	Cont	g/day in last week	GO pathway	GO:0051252	regulation of RNA metabolic process	BP	3667	206	0.004017	0.205235
Dugue 2019	5606	NR	Cont	g/day in last week	GO pathway	GO:0010594	regulation of endothelial cell migration	BP	118	13	0.004041	0.20596
Dugue 2019	5606	NR	Cont	g/day in last week	GO pathway	GO:0003712	transcription cofactor activity	MF	525	39	0.00405	0.20596
Dugue 2019	5606	NR	Cont	g/day in last week	GO pathway	GO:0016020	membrane	CC	8736	454	0.00408	0.206966
Dugue 2019	5606	NR	Cont	g/day in last week	GO pathway	GO:0008380	RNA splicing	BP	409	32	0.00412	0.208529
Dugue 2019	5606	NR	Cont	g/day in last week	GO pathway	GO:0048514	blood vessel morphogenesis	BP	492	37	0.004133	0.208691
Dugue 2019	5606	NR	Cont	g/day in last week	GO pathway	GO:0016310	phosphorylation	BP	2171	129	0.004163	0.208859
Dugue 2019	5606	NR	Cont	g/day in last week	GO pathway	GO:2001235	positive regulation of apoptotic signaling pathway	BP	175	17	0.004186	0.208859
Dugue 2019	5606	NR	Cont	g/day in last week	GO pathway	GO:0001568	blood vessel development	BP	577	42	0.004193	0.208859
Dugue 2019	5606	NR	Cont	g/day in last week	GO pathway	GO:0042339	keratan sulfate metabolic process	BP	33	6	0.004194	0.208859
Dugue 2019	5606	NR	Cont	g/day in last week	GO pathway	GO:0099622	cardiac muscle cell membrane repolarization	BP	33	6	0.004194	0.208859
Dugue 2019	5606	NR	Cont	g/day in last week	GO pathway	GO:0015175	neutral amino acid transmembrane transporter activity	MF	33	6	0.004194	0.208859
Dugue 2019	5606	NR	Cont	g/day in last week	GO pathway	GO:1901575	organic substance catabolic process	BP	1832	111	0.004356	0.216454
Dugue 2019	5606	NR	Cont	g/day in last week	GO pathway	GO:0038127	ERBB signaling pathway	BP	147	15	0.004386	0.21743
Dugue 2019	5606	NR	Cont	g/day in last week	GO pathway	GO:0016482	cytosolic transport	BP	133	14	0.004405	0.217876
Dugue 2019	5606	NR	Cont	g/day in last week	GO pathway	GO:0000988	transcription factor activity, protein binding	MF	596	43	0.004439	0.219076
Dugue 2019	5606	NR	Cont	g/day in last week	GO pathway	GO:0005737	cytoplasm	CC	10803	551	0.004464	0.219836
Dugue 2019	5606	NR	Cont	g/day in last week	GO pathway	GO:0042058	regulation of epidermal growth factor receptor signaling pathway	BP	80	10	0.004551	0.223615
Dugue 2019	5606	NR	Cont	g/day in last week	GO pathway	GO:0007219	Notch signaling pathway	BP	162	16	0.004575	0.224257
Dugue 2019	5606	NR	Cont	g/day in last week	GO pathway	GO:0050896	response to stimulus	BP	8120	424	0.004596	0.22479
Dugue 2019	5606	NR	Cont	g/day in last week	GO pathway	GO:0030425	dendrite	CC	462	35	0.004634	0.22615
Dugue 2019	5606	NR	Cont	g/day in last week	GO pathway	GO:0006396	RNA processing	BP	896	60	0.004705	0.229096
Dugue 2019	5606	NR	Cont	g/day in last week	GO pathway	GO:0048468	cell development	BP	1875	113	0.00475	0.230395
Dugue 2019	5606	NR	Cont	g/day in last week	GO pathway	GO:0046902	regulation of mitochondrial membrane permeability	BP	68	9	0.004758	0.230395
Dugue 2019	5606	NR	Cont	g/day in last week	GO pathway	GO:0008219	cell death	BP	2008	120	0.004763	0.230395
Dugue 2019	5606	NR	Cont	g/day in last week	GO pathway	GO:0031226	intrinsic component of plasma membrane	CC	1593	98	0.004776	0.230487
Dugue 2019	5606	NR	Cont	g/day in last week	GO pathway	GO:0048699	generation of neurons	BP	1333	84	0.004792	0.230769
Dugue 2019	5606	NR	Cont	g/day in last week	GO pathway	GO:0086011	membrane repolarization during action potential	BP	24	5	0.004814	0.230775
Dugue 2019	5606	NR	Cont	g/day in last week	GO pathway	GO:0035412	regulation of catenin import into nucleus	BP	24	5	0.004814	0.230775
Dugue 2019	5606	NR	Cont	g/day in last week	GO pathway	GO:0043086	negative regulation of catalytic activity	BP	826	56	0.004836	0.23136
Dugue 2019	5606	NR	Cont	g/day in last week	GO pathway	GO:0045747	positive regulation of Notch signaling pathway	BP	34	6	0.004891	0.232951
Dugue 2019	5606	NR	Cont	g/day in last week	GO pathway	GO:0019438	aromatic compound biosynthetic process	BP	4320	238	0.004898	0.232951
Dugue 2019	5606	NR	Cont	g/day in last week	GO pathway	GO:0006606	protein import into nucleus	BP	269	23	0.004912	0.232951
Dugue 2019	5606	NR	Cont	g/day in last week	GO pathway	GO:0044744	protein targeting to nucleus	BP	269	23	0.004912	0.232951
Dugue 2019	5606	NR	Cont	g/day in last week	GO pathway	GO:0003705	transcription factor activity, RNA polymerase II distal enhancer sequence-specific binding	MF	94	11	0.004994	0.234553
Dugue 2019	5606	NR	Cont	g/day in last week	GO pathway	GO:0009158	ribonucleoside monophosphate catabolic process	BP	8	3	0.005021	0.234553
Dugue 2019	5606	NR	Cont	g/day in last week	GO pathway	GO:0009169	purine ribonucleoside monophosphate catabolic process	BP	8	3	0.005021	0.234553
Dugue 2019	5606	NR	Cont	g/day in last week	GO pathway	GO:0007172	signal complex assembly	BP	8	3	0.005021	0.234553
Dugue 2019	5606	NR	Cont	g/day in last week	GO pathway	GO:0006268	DNA unwinding involved in DNA replication	BP	8	3	0.005021	0.234553
Dugue 2019	5606	NR	Cont	g/day in last week	GO pathway	GO:0032009	early phagosome	CC	8	3	0.005021	0.234553
Dugue 2019	5606	NR	Cont	g/day in last week	GO pathway	GO:0098505	G-rich strand telomeric DNA binding	MF	8	3	0.005021	0.234553
Dugue 2019	5606	NR	Cont	g/day in last week	GO pathway	GO:0007265	Ras protein signal transduction	BP	317	26	0.005033	0.234572
Dugue 2019	5606	NR	Cont	g/day in last week	GO pathway	GO:0012501	programmed cell death	BP	1898	114	0.005077	0.236124
Dugue 2019	5606	NR	Cont	g/day in last week	GO pathway	GO:0043087	regulation of GTPase activity	BP	688	48	0.005186	0.240716
Dugue 2019	5606	NR	Cont	g/day in last week	GO pathway	GO:0022008	neurogenesis	BP	1430	89	0.005211	0.241356
Dugue 2019	5606	NR	Cont	g/day in last week	GO pathway	GO:0002040	sprouting angiogenesis	BP	69	9	0.005246	0.242466
Dugue 2019	5606	NR	Cont	g/day in last week	GO pathway	GO:0009116	nucleoside metabolic process	BP	122	13	0.005367	0.247015
Dugue 2019	5606	NR	Cont	g/day in last week	GO pathway	GO:0043197	dendritic spine	CC	122	13	0.005367	0.247015
Dugue 2019	5606	NR	Cont	g/day in last week	GO pathway	GO:0006996	organelle organization	BP	3612	202	0.005413	0.248286
Dugue 2019	5606	NR	Cont	g/day in last week	GO pathway	GO:1902580	single-organism cellular localization	BP	902	60	0.005418	0.248286
Dugue 2019	5606	NR	Cont	g/day in last week	GO pathway	GO:0031589	cell-substrate adhesion	BP	303	25	0.005454	0.249423
Dugue 2019	5606	NR	Cont	g/day in last week	GO pathway	GO:0006796	phosphate-containing compound metabolic process	BP	3042	173	0.005486	0.250373
Dugue 2019	5606	NR	Cont	g/day in last week	GO pathway	GO:0006725	cellular aromatic compound metabolic process	BP	5828	312	0.005601	0.254922
Dugue 2019	5606	NR	Cont	g/day in last week	GO pathway	GO:1902593	single-organism nuclear import	BP	272	23	0.005609	0.254922
Dugue 2019	5606	NR	Cont	g/day in last week	GO pathway	GO:0000989	transcription factor activity, transcription factor binding	MF	587	42	0.005636	0.255604
Dugue 2019	5606	NR	Cont	g/day in last week	GO pathway	GO:0044431	Golgi apparatus part	CC	886	59	0.005663	0.255842
Dugue 2019	5606	NR	Cont	g/day in last week	GO pathway	GO:1901362	organic cyclic compound biosynthetic process	BP	4453	244	0.005665	0.255842
Dugue 2019	5606	NR	Cont	g/day in last week	GO pathway	GO:0000166	nucleotide binding	MF	2058	122	0.005741	0.258051
Dugue 2019	5606	NR	Cont	g/day in last week	GO pathway	GO:0071901	negative regulation of protein serine/threonine kinase activity	BP	123	13	0.005748	0.258051
Dugue 2019	5606	NR	Cont	g/day in last week	GO pathway	GO:0046483	heterocycle metabolic process	BP	5790	310	0.005764	0.258051
Dugue 2019	5606	NR	Cont	g/day in last week	GO pathway	GO:0007045	cell-substrate adherens junction assembly	BP	70	9	0.005773	0.258051
Dugue 2019	5606	NR	Cont	g/day in last week	GO pathway	GO:0048041	focal adhesion assembly	BP	70	9	0.005773	0.258051
Dugue 2019	5606	NR	Cont	g/day in last week	GO pathway	GO:1901360	organic cyclic compound metabolic process	BP	6036	322	0.005818	0.259558
Dugue 2019	5606	NR	Cont	g/day in last week	GO pathway	GO:1901265	nucleoside phosphate binding	MF	2059	122	0.005831	0.259568
Dugue 2019	5606	NR	Cont	g/day in last week	GO pathway	GO:1902001	fatty acid transmembrane transport	BP	16	4	0.005854	0.259603
Dugue 2019	5606	NR	Cont	g/day in last week	GO pathway	GO:0006810	transport	BP	4818	262	0.005855	0.259603
Dugue 2019	5606	NR	Cont	g/day in last week	GO pathway	GO:0042060	wound healing	BP	520	38	0.005884	0.260366
Dugue 2019	5606	NR	Cont	g/day in last week	GO pathway	GO:0032392	DNA geometric change	BP	83	10	0.005921	0.260931
Dugue 2019	5606	NR	Cont	g/day in last week	GO pathway	GO:0060333	interferon-gamma-mediated signaling pathway	BP	83	10	0.005921	0.260931
Dugue 2019	5606	NR	Cont	g/day in last week	GO pathway	GO:0090087	regulation of peptide transport	BP	764	52	0.006019	0.264707
Dugue 2019	5606	NR	Cont	g/day in last week	GO pathway	GO:0032774	RNA biosynthetic process	BP	3800	211	0.006066	0.266247
Dugue 2019	5606	NR	Cont	g/day in last week	GO pathway	GO:0022613	ribonucleoprotein complex biogenesis	BP	437	33	0.006141	0.268645
Dugue 2019	5606	NR	Cont	g/day in last week	GO pathway	GO:0044309	neuron spine	CC	124	13	0.00615	0.268645
Dugue 2019	5606	NR	Cont	g/day in last week	GO pathway	GO:0051170	nuclear import	BP	290	24	0.006158	0.268645
Dugue 2019	5606	NR	Cont	g/day in last week	GO pathway	GO:0016740	transferase activity	MF	2332	136	0.00622	0.270808
Dugue 2019	5606	NR	Cont	g/day in last week	GO pathway	GO:0043044	ATP-dependent chromatin remodeling	BP	71	9	0.006339	0.275464
Dugue 2019	5606	NR	Cont	g/day in last week	GO pathway	GO:0023014	signal transduction by protein phosphorylation	BP	891	59	0.006359	0.27576
Dugue 2019	5606	NR	Cont	g/day in last week	GO pathway	GO:0002181	cytoplasmic translation	BP	47	7	0.006426	0.277207
Dugue 2019	5606	NR	Cont	g/day in last week	GO pathway	GO:0008150	biological_process	BP	16360	799	0.006469	0.277207
Dugue 2019	5606	NR	Cont	g/day in last week	GO pathway	GO:0032845	negative regulation of homeostatic process	BP	183	17	0.006533	0.277207
Dugue 2019	5606	NR	Cont	g/day in last week	GO pathway	GO:0031228	intrinsic component of Golgi membrane	CC	59	8	0.006563	0.277207
Dugue 2019	5606	NR	Cont	g/day in last week	GO pathway	GO:0009153	purine deoxyribonucleotide biosynthetic process	BP	3	2	0.00657	0.277207
Dugue 2019	5606	NR	Cont	g/day in last week	GO pathway	GO:0010616	negative regulation of cardiac muscle adaptation	BP	3	2	0.00657	0.277207
Dugue 2019	5606	NR	Cont	g/day in last week	GO pathway	GO:1903243	negative regulation of cardiac muscle hypertrophy in response to stress	BP	3	2	0.00657	0.277207
Dugue 2019	5606	NR	Cont	g/day in last week	GO pathway	GO:0002428	antigen processing and presentation of peptide antigen via MHC class Ib	BP	3	2	0.00657	0.277207
Dugue 2019	5606	NR	Cont	g/day in last week	GO pathway	GO:1902445	regulation of mitochondrial membrane permeability involved in programmed necrotic cell death	BP	3	2	0.00657	0.277207
Dugue 2019	5606	NR	Cont	g/day in last week	GO pathway	GO:0031587	positive regulation of inositol 1,4,5-trisphosphate-sensitive calcium-release channel activity	BP	3	2	0.00657	0.277207
Dugue 2019	5606	NR	Cont	g/day in last week	GO pathway	GO:0010728	regulation of hydrogen peroxide biosynthetic process	BP	3	2	0.00657	0.277207
Dugue 2019	5606	NR	Cont	g/day in last week	GO pathway	GO:0047374	methylumbelliferyl-acetate deacetylase activity	MF	3	2	0.00657	0.277207
Dugue 2019	5606	NR	Cont	g/day in last week	GO pathway	GO:0005220	inositol 1,4,5-trisphosphate-sensitive calcium-release channel activity	MF	3	2	0.00657	0.277207
Dugue 2019	5606	NR	Cont	g/day in last week	GO pathway	GO:0004699	calcium-independent protein kinase C activity	MF	3	2	0.00657	0.277207
Dugue 2019	5606	NR	Cont	g/day in last week	GO pathway	GO:0035411	catenin import into nucleus	BP	26	5	0.006887	0.289468
Dugue 2019	5606	NR	Cont	g/day in last week	GO pathway	GO:0006376	mRNA splice site selection	BP	26	5	0.006887	0.289468
Dugue 2019	5606	NR	Cont	g/day in last week	GO pathway	GO:1902531	regulation of intracellular signal transduction	BP	1690	102	0.006947	0.291432
Dugue 2019	5606	NR	Cont	g/day in last week	GO pathway	GO:0045944	positive regulation of transcription from RNA polymerase II promoter	BP	1040	67	0.006994	0.292845
Dugue 2019	5606	NR	Cont	g/day in last week	GO pathway	GO:0010941	regulation of cell death	BP	1485	91	0.007175	0.298394
Dugue 2019	5606	NR	Cont	g/day in last week	GO pathway	GO:1904589	regulation of protein import	BP	170	16	0.007238	0.298394
Dugue 2019	5606	NR	Cont	g/day in last week	GO pathway	GO:0035195	gene silencing by miRNA	BP	60	8	0.007266	0.298394
Dugue 2019	5606	NR	Cont	g/day in last week	GO pathway	GO:0009265	2'-deoxyribonucleotide biosynthetic process	BP	9	3	0.007267	0.298394
Dugue 2019	5606	NR	Cont	g/day in last week	GO pathway	GO:0046385	deoxyribose phosphate biosynthetic process	BP	9	3	0.007267	0.298394
Dugue 2019	5606	NR	Cont	g/day in last week	GO pathway	GO:0032000	positive regulation of fatty acid beta-oxidation	BP	9	3	0.007267	0.298394
Dugue 2019	5606	NR	Cont	g/day in last week	GO pathway	GO:0009128	purine nucleoside monophosphate catabolic process	BP	9	3	0.007267	0.298394
Dugue 2019	5606	NR	Cont	g/day in last week	GO pathway	GO:0002315	marginal zone B cell differentiation	BP	9	3	0.007267	0.298394
Dugue 2019	5606	NR	Cont	g/day in last week	GO pathway	GO:0031095	platelet dense tubular network membrane	CC	9	3	0.007267	0.298394
Dugue 2019	5606	NR	Cont	g/day in last week	GO pathway	GO:0016281	eukaryotic translation initiation factor 4F complex	CC	9	3	0.007267	0.298394
Dugue 2019	5606	NR	Cont	g/day in last week	GO pathway	GO:0005543	phospholipid binding	MF	359	28	0.007277	0.298394
Dugue 2019	5606	NR	Cont	g/day in last week	GO pathway	GO:0043558	regulation of translational initiation in response to stress	BP	17	4	0.007371	0.30168
Dugue 2019	5606	NR	Cont	g/day in last week	GO pathway	GO:0006950	response to stress	BP	3559	198	0.007418	0.303029
Dugue 2019	5606	NR	Cont	g/day in last week	GO pathway	GO:0015934	large ribosomal subunit	CC	113	12	0.007512	0.306285
Dugue 2019	5606	NR	Cont	g/day in last week	GO pathway	GO:0097367	carbohydrate derivative binding	MF	2172	127	0.007543	0.306996
Dugue 2019	5606	NR	Cont	g/day in last week	GO pathway	GO:0007044	cell-substrate junction assembly	BP	86	10	0.007592	0.308112
Dugue 2019	5606	NR	Cont	g/day in last week	GO pathway	GO:0090559	regulation of membrane permeability	BP	73	9	0.007599	0.308112
Dugue 2019	5606	NR	Cont	g/day in last week	GO pathway	GO:0051234	establishment of localization	BP	4945	267	0.007723	0.31256
Dugue 2019	5606	NR	Cont	g/day in last week	GO pathway	GO:0001525	angiogenesis	BP	411	31	0.007876	0.318165
Dugue 2019	5606	NR	Cont	g/day in last week	GO pathway	GO:0044248	cellular catabolic process	BP	1888	112	0.007922	0.319438
Dugue 2019	5606	NR	Cont	g/day in last week	GO pathway	GO:0010720	positive regulation of cell development	BP	445	33	0.00798	0.32117
Dugue 2019	5606	NR	Cont	g/day in last week	GO pathway	GO:0046824	positive regulation of nucleocytoplasmic transport	BP	114	12	0.008043	0.323129
Dugue 2019	5606	NR	Cont	g/day in last week	GO pathway	GO:0070265	necrotic cell death	BP	49	7	0.008088	0.324336
Dugue 2019	5606	NR	Cont	g/day in last week	GO pathway	GO:0050996	positive regulation of lipid catabolic process	BP	27	5	0.008128	0.324717
Dugue 2019	5606	NR	Cont	g/day in last week	GO pathway	GO:0036002	pre-mRNA binding	MF	27	5	0.008128	0.324717
Dugue 2019	5606	NR	Cont	g/day in last week	GO pathway	GO:0007264	small GTPase mediated signal transduction	BP	481	35	0.008514	0.339544
Dugue 2019	5606	NR	Cont	g/day in last week	GO pathway	GO:0050684	regulation of mRNA processing	BP	101	11	0.008531	0.339585
[truncated: 909 more rows]
